# Supplementary material for: Leveraging machine learning engineering to uncover insights into heterogeneous catalyst design for oxidative coupling of methane
Source: Royal Society of Chemistry journal article supplement (doi:10.1039/d3cy00596h), 2023-01-01
Supplement: d3cy00596h2.csv [file d3cy00596h2.csv]

List0.csv: Dataset history used as input data for prediction in the present study
M1	M2	M3	Support	Temperature	pch4	po2	pinert	CH4/O2	C2y	Resource	Ag	Al	Al2O3	Au	BEA	BN	Ba	BaO	Be	BeO	Bi	Bi2O3	Ca	CaO	Cd	Ce	CeO2	Co	Cr	Cs	Cu	Dy	Dy2O3	Er	Eu	Eu2O3	Fe	Fe2O3	Ga	Gd2O3	Ge	Hf	In	K	K2O	La	La2O3	Li	Li2O
Li	K	Mn	MgO	80	0.566666667	0.283333333	0.15	2	8.214982	1_HTS300	0	0	0	0	0	0	0	0	0	0	0	0	0	0	0	0	0	0	0	0	0	0	0	0	0	0	0	0	0	0	0	0	0	1	0	0	0	1	0
Li	Fe	Tb	MgO	85	0.4	0.2	0.4	2	4.712364521	1_HTS300	0	0	0	0	0	0	0	0	0	0	0	0	0	0	0	0	0	0	0	0	0	0	0	0	0	0	1	0	0	0	0	0	0	0	0	0	0	1	0
Na	Na	none	MgO	85	0.566666667	0.283333333	0.15	2	7.363833	1_HTS300	0	0	0	0	0	0	0	0	0	0	0	0	0	0	0	0	0	0	0	0	0	0	0	0	0	0	0	0	0	0	0	0	0	0	0	0	0	0	0
Na	Ni	Y	MgO	75	0.257142857	0.042857143	0.7	6	0.981481427	1_HTS300	0	0	0	0	0	0	0	0	0	0	0	0	0	0	0	0	0	0	0	0	0	0	0	0	0	0	0	0	0	0	0	0	0	0	0	0	0	0	0
Na	Ce	Tb	MgO	90	0.728571429	0.121428571	0.15	6	3.831034876	1_HTS300	0	0	0	0	0	0	0	0	0	0	0	0	0	0	0	1	0	0	0	0	0	0	0	0	0	0	0	0	0	0	0	0	0	0	0	0	0	0	0
Na	Tb	Hf	MgO	80	0.566666667	0.283333333	0.15	2	8.551982	1_HTS300	0	0	0	0	0	0	0	0	0	0	0	0	0	0	0	0	0	0	0	0	0	0	0	0	0	0	0	0	0	0	0	1	0	0	0	0	0	0	0
Mg	Ca	Zn	MgO	85	0.68	0.17	0.15	4	2.140482	1_HTS300	0	0	0	0	0	0	0	0	0	0	0	0	1	0	0	0	0	0	0	0	0	0	0	0	0	0	0	0	0	0	0	0	0	0	0	0	0	0	0
Mg	Mn	none	MgO	85	0.566666667	0.283333333	0.15	2	7.853492288	1_HTS300	0	0	0	0	0	0	0	0	0	0	0	0	0	0	0	0	0	0	0	0	0	0	0	0	0	0	0	0	0	0	0	0	0	0	0	0	0	0	0
Mg	Zn	Eu	MgO	70	0.566666667	0.283333333	0.15	2	15.494094	1_HTS300	0	0	0	0	0	0	0	0	0	0	0	0	0	0	0	0	0	0	0	0	0	0	0	0	1	0	0	0	0	0	0	0	0	0	0	0	0	0	0
Mg	Nd	none	MgO	85	0.2	0.1	0.7	2	9.503653	1_HTS300	0	0	0	0	0	0	0	0	0	0	0	0	0	0	0	0	0	0	0	0	0	0	0	0	0	0	0	0	0	0	0	0	0	0	0	0	0	0	0
Ca	Zr	La	MgO	75	0.566666667	0.283333333	0.15	2	16.08512799	1_HTS300	0	0	0	0	0	0	0	0	0	0	0	0	1	0	0	0	0	0	0	0	0	0	0	0	0	0	0	0	0	0	0	0	0	0	0	1	0	0	0
Ti	Ni	Cs	MgO	80	0.4	0.2	0.4	2	1.592734372	1_HTS300	0	0	0	0	0	0	0	0	0	0	0	0	0	0	0	0	0	0	0	1	0	0	0	0	0	0	0	0	0	0	0	0	0	0	0	0	0	0	0
V	Fe	Ni	MgO	80	0.566666667	0.283333333	0.15	2	7.558912	1_HTS300	0	0	0	0	0	0	0	0	0	0	0	0	0	0	0	0	0	0	0	0	0	0	0	0	0	0	1	0	0	0	0	0	0	0	0	0	0	0	0
V	Mo	Pd	MgO	90	0.257142857	0.042857143	0.7	6	0.571072197	1_HTS300	0	0	0	0	0	0	0	0	0	0	0	0	0	0	0	0	0	0	0	0	0	0	0	0	0	0	0	0	0	0	0	0	0	0	0	0	0	0	0
V	Tb	W	MgO	85	0.566666667	0.283333333	0.15	2	6.688506059	1_HTS300	0	0	0	0	0	0	0	0	0	0	0	0	0	0	0	0	0	0	0	0	0	0	0	0	0	0	0	0	0	0	0	0	0	0	0	0	0	0	0
Fe	Y	Nd	MgO	80	0.566666667	0.283333333	0.15	2	3.637092052	1_HTS300	0	0	0	0	0	0	0	0	0	0	0	0	0	0	0	0	0	0	0	0	0	0	0	0	0	0	1	0	0	0	0	0	0	0	0	0	0	0	0
Fe	Zr	none	MgO	85	0.566666667	0.283333333	0.15	2	7.061936	1_HTS300	0	0	0	0	0	0	0	0	0	0	0	0	0	0	0	0	0	0	0	0	0	0	0	0	0	0	1	0	0	0	0	0	0	0	0	0	0	0	0
Fe	Ce	Tb	MgO	80	0.566666667	0.283333333	0.15	2	6.236992	1_HTS300	0	0	0	0	0	0	0	0	0	0	0	0	0	0	0	1	0	0	0	0	0	0	0	0	0	0	1	0	0	0	0	0	0	0	0	0	0	0	0
Co	Zn	Sr	MgO	85	0.728571429	0.121428572	0.15	6	0.985061	1_HTS300	0	0	0	0	0	0	0	0	0	0	0	0	0	0	0	0	0	1	0	0	0	0	0	0	0	0	0	0	0	0	0	0	0	0	0	0	0	0	0
Co	Zn	Tb	MgO	90	0.566666667	0.283333333	0.15	2	5.721083	1_HTS300	0	0	0	0	0	0	0	0	0	0	0	0	0	0	0	0	0	1	0	0	0	0	0	0	0	0	0	0	0	0	0	0	0	0	0	0	0	0	0
Co	Y	Hf	MgO	70	0.566666667	0.283333333	0.15	2	7.038972457	1_HTS300	0	0	0	0	0	0	0	0	0	0	0	0	0	0	0	0	0	1	0	0	0	0	0	0	0	0	0	0	0	0	0	1	0	0	0	0	0	0	0
Ni	Y	Tb	MgO	90	0.24	0.06	0.7	4	5.633076	1_HTS300	0	0	0	0	0	0	0	0	0	0	0	0	0	0	0	0	0	0	0	0	0	0	0	0	0	0	0	0	0	0	0	0	0	0	0	0	0	0	0
Y	La	Ce	MgO	70	0.566666667	0.283333333	0.15	2	12.13071	1_HTS300	0	0	0	0	0	0	0	0	0	0	0	0	0	0	0	1	0	0	0	0	0	0	0	0	0	0	0	0	0	0	0	0	0	0	0	1	0	0	0
Mo	Cs	La	MgO	85	0.4	0.2	0.4	2	8.529655	1_HTS300	0	0	0	0	0	0	0	0	0	0	0	0	0	0	0	0	0	0	0	1	0	0	0	0	0	0	0	0	0	0	0	0	0	0	0	1	0	0	0
Mo	Ce	Tb	MgO	80	0.566666667	0.283333333	0.15	2	7.306633091	1_HTS300	0	0	0	0	0	0	0	0	0	0	0	0	0	0	0	1	0	0	0	0	0	0	0	0	0	0	0	0	0	0	0	0	0	0	0	0	0	0	0
Li	Mg	Hf	Al2O3	85	0.566666667	0.283333333	0.15	2	3.196445	1_HTS300	0	0	1	0	0	0	0	0	0	0	0	0	0	0	0	0	0	0	0	0	0	0	0	0	0	0	0	0	0	0	0	1	0	0	0	0	0	1	0
Li	Ca	Mn	Al2O3	85	0.566666667	0.283333333	0.15	2	7.20235	1_HTS300	0	0	1	0	0	0	0	0	0	0	0	0	1	0	0	0	0	0	0	0	0	0	0	0	0	0	0	0	0	0	0	0	0	0	0	0	0	1	0
Li	Ti	La	Al2O3	85	0.2	0.1	0.7	2	15.49130161	1_HTS300	0	0	1	0	0	0	0	0	0	0	0	0	0	0	0	0	0	0	0	0	0	0	0	0	0	0	0	0	0	0	0	0	0	0	0	1	0	1	0
Li	Fe	none	Al2O3	85	0.2	0.1	0.7	2	9.172113773	1_HTS300	0	0	1	0	0	0	0	0	0	0	0	0	0	0	0	0	0	0	0	0	0	0	0	0	0	0	1	0	0	0	0	0	0	0	0	0	0	1	0
Na	K	Hf	Al2O3	85	0.4	0.2	0.4	2	8.233361977	1_HTS300	0	0	1	0	0	0	0	0	0	0	0	0	0	0	0	0	0	0	0	0	0	0	0	0	0	0	0	0	0	0	0	1	0	1	0	0	0	0	0
Na	Ti	Cu	Al2O3	85	0.48	0.12	0.4	4	11.53843515	1_HTS300	0	0	1	0	0	0	0	0	0	0	0	0	0	0	0	0	0	0	0	0	1	0	0	0	0	0	0	0	0	0	0	0	0	0	0	0	0	0	0
Na	Mn	Ni	Al2O3	85	0.257142857	0.042857143	0.7	6	1.195965	1_HTS300	0	0	1	0	0	0	0	0	0	0	0	0	0	0	0	0	0	0	0	0	0	0	0	0	0	0	0	0	0	0	0	0	0	0	0	0	0	0	0
Na	Co	Ni	Al2O3	80	0.566666667	0.283333333	0.15	2	7.760119	1_HTS300	0	0	1	0	0	0	0	0	0	0	0	0	0	0	0	0	0	1	0	0	0	0	0	0	0	0	0	0	0	0	0	0	0	0	0	0	0	0	0
Na	Co	none	Al2O3	85	0.2	0.1	0.7	2	9.327097727	1_HTS300	0	0	1	0	0	0	0	0	0	0	0	0	0	0	0	0	0	1	0	0	0	0	0	0	0	0	0	0	0	0	0	0	0	0	0	0	0	0	0
Na	Cu	Ce	Al2O3	90	0.566666667	0.283333333	0.15	2	3.15607	1_HTS300	0	0	1	0	0	0	0	0	0	0	0	0	0	0	0	1	0	0	0	0	1	0	0	0	0	0	0	0	0	0	0	0	0	0	0	0	0	0	0
Mg	Mn	Cs	Al2O3	90	0.2	0.1	0.7	2	8.571361	1_HTS300	0	0	1	0	0	0	0	0	0	0	0	0	0	0	0	0	0	0	0	1	0	0	0	0	0	0	0	0	0	0	0	0	0	0	0	0	0	0	0
Mg	Co	Ba	Al2O3	90	0.566666667	0.283333333	0.15	2	2.68219	1_HTS300	0	0	1	0	0	0	1	0	0	0	0	0	0	0	0	0	0	1	0	0	0	0	0	0	0	0	0	0	0	0	0	0	0	0	0	0	0	0	0
Mg	La	Nd	Al2O3	85	0.566666667	0.283333333	0.15	2	8.155818	1_HTS300	0	0	1	0	0	0	0	0	0	0	0	0	0	0	0	0	0	0	0	0	0	0	0	0	0	0	0	0	0	0	0	0	0	0	0	1	0	0	0
K	Mn	Ni	Al2O3	90	0.257142857	0.042857143	0.7	6	1.536943	1_HTS300	0	0	1	0	0	0	0	0	0	0	0	0	0	0	0	0	0	0	0	0	0	0	0	0	0	0	0	0	0	0	0	0	0	1	0	0	0	0	0
K	Co	Cs	Al2O3	85	0.2	0.1	0.7	2	9.348595323	1_HTS300	0	0	1	0	0	0	0	0	0	0	0	0	0	0	0	0	0	1	0	1	0	0	0	0	0	0	0	0	0	0	0	0	0	1	0	0	0	0	0
K	Y	Hf	Al2O3	85	0.24	0.06	0.7	4	10.75102371	1_HTS300	0	0	1	0	0	0	0	0	0	0	0	0	0	0	0	0	0	0	0	0	0	0	0	0	0	0	0	0	0	0	0	1	0	1	0	0	0	0	0
K	La	W	Al2O3	80	0.4	0.2	0.4	2	4.712427	1_HTS300	0	0	1	0	0	0	0	0	0	0	0	0	0	0	0	0	0	0	0	0	0	0	0	0	0	0	0	0	0	0	0	0	0	1	0	1	0	0	0
Ti	Mn	Y	Al2O3	85	0.566666667	0.283333333	0.15	2	10.43194533	1_HTS300	0	0	1	0	0	0	0	0	0	0	0	0	0	0	0	0	0	0	0	0	0	0	0	0	0	0	0	0	0	0	0	0	0	0	0	0	0	0	0
Ti	Fe	Mo	Al2O3	85	0.4	0.2	0.4	2	9.393557463	1_HTS300	0	0	1	0	0	0	0	0	0	0	0	0	0	0	0	0	0	0	0	0	0	0	0	0	0	0	1	0	0	0	0	0	0	0	0	0	0	0	0
Ti	Cs	La	Al2O3	80	0.4	0.2	0.4	2	7.638206007	1_HTS300	0	0	1	0	0	0	0	0	0	0	0	0	0	0	0	0	0	0	0	1	0	0	0	0	0	0	0	0	0	0	0	0	0	0	0	1	0	0	0
V	Cu	Ba	Al2O3	90	0.566666667	0.283333333	0.15	2	1.772113	1_HTS300	0	0	1	0	0	0	1	0	0	0	0	0	0	0	0	0	0	0	0	0	1	0	0	0	0	0	0	0	0	0	0	0	0	0	0	0	0	0	0
Fe	Pd	Nd	Al2O3	85	0.68	0.17	0.15	4	11.62026986	1_HTS300	0	0	1	0	0	0	0	0	0	0	0	0	0	0	0	0	0	0	0	0	0	0	0	0	0	0	1	0	0	0	0	0	0	0	0	0	0	0	0
Fe	Ba	none	Al2O3	85	0.566666667	0.283333333	0.15	2	4.858876	1_HTS300	0	0	1	0	0	0	1	0	0	0	0	0	0	0	0	0	0	0	0	0	0	0	0	0	0	0	1	0	0	0	0	0	0	0	0	0	0	0	0
Fe	La	W	Al2O3	85	0.566666667	0.283333333	0.15	2	2.736186	1_HTS300	0	0	1	0	0	0	0	0	0	0	0	0	0	0	0	0	0	0	0	0	0	0	0	0	0	0	1	0	0	0	0	0	0	0	0	1	0	0	0
Co	Ni	Zr	Al2O3	90	0.566666667	0.283333333	0.15	2	1.319313	1_HTS300	0	0	1	0	0	0	0	0	0	0	0	0	0	0	0	0	0	1	0	0	0	0	0	0	0	0	0	0	0	0	0	0	0	0	0	0	0	0	0
Co	Zn	Nd	Al2O3	85	0.4	0.2	0.4	2	10.20222744	1_HTS300	0	0	1	0	0	0	0	0	0	0	0	0	0	0	0	0	0	1	0	0	0	0	0	0	0	0	0	0	0	0	0	0	0	0	0	0	0	0	0
Co	Y	Tb	Al2O3	80	0.566666667	0.283333333	0.15	2	5.915548	1_HTS300	0	0	1	0	0	0	0	0	0	0	0	0	0	0	0	0	0	1	0	0	0	0	0	0	0	0	0	0	0	0	0	0	0	0	0	0	0	0	0
Ni	Cu	Zr	Al2O3	75	0.24	0.06	0.7	4	1.58127	1_HTS300	0	0	1	0	0	0	0	0	0	0	0	0	0	0	0	0	0	0	0	0	1	0	0	0	0	0	0	0	0	0	0	0	0	0	0	0	0	0	0
Ni	Zn	La	Al2O3	75	0.257142857	0.042857143	0.7	6	0.964211	1_HTS300	0	0	1	0	0	0	0	0	0	0	0	0	0	0	0	0	0	0	0	0	0	0	0	0	0	0	0	0	0	0	0	0	0	0	0	1	0	0	0
Cu	Y	Ce	Al2O3	90	0.728571429	0.121428572	0.15	6	1.677541	1_HTS300	0	0	1	0	0	0	0	0	0	0	0	0	0	0	0	1	0	0	0	0	1	0	0	0	0	0	0	0	0	0	0	0	0	0	0	0	0	0	0
Zn	Pd	Cs	Al2O3	85	0.257142857	0.042857143	0.7	6	2.044943	1_HTS300	0	0	1	0	0	0	0	0	0	0	0	0	0	0	0	0	0	0	0	1	0	0	0	0	0	0	0	0	0	0	0	0	0	0	0	0	0	0	0
Sr	Pd	none	Al2O3	85	0.68	0.17	0.15	4	9.055672767	1_HTS300	0	0	1	0	0	0	0	0	0	0	0	0	0	0	0	0	0	0	0	0	0	0	0	0	0	0	0	0	0	0	0	0	0	0	0	0	0	0	0
Y	Pd	Ba	Al2O3	85	0.4	0.2	0.4	2	9.364501036	1_HTS300	0	0	1	0	0	0	1	0	0	0	0	0	0	0	0	0	0	0	0	0	0	0	0	0	0	0	0	0	0	0	0	0	0	0	0	0	0	0	0
Zr	Cs	La	Al2O3	85	0.2	0.1	0.7	2	9.279458299	1_HTS300	0	0	1	0	0	0	0	0	0	0	0	0	0	0	0	0	0	0	0	1	0	0	0	0	0	0	0	0	0	0	0	0	0	0	0	1	0	0	0
Li	K	Co	SiO2	85	0.2	0.1	0.7	2	10.435427	1_HTS300	0	0	0	0	0	0	0	0	0	0	0	0	0	0	0	0	0	1	0	0	0	0	0	0	0	0	0	0	0	0	0	0	0	1	0	0	0	1	0
Li	Fe	W	SiO2	90	0.4	0.2	0.4	2	6.518734	1_HTS300	0	0	0	0	0	0	0	0	0	0	0	0	0	0	0	0	0	0	0	0	0	0	0	0	0	0	1	0	0	0	0	0	0	0	0	0	0	1	0
Li	Ni	none	SiO2	85	0.4	0.2	0.4	2	8.130311	1_HTS300	0	0	0	0	0	0	0	0	0	0	0	0	0	0	0	0	0	0	0	0	0	0	0	0	0	0	0	0	0	0	0	0	0	0	0	0	0	1	0
Li	Nd	Tb	SiO2	85	0.4	0.2	0.4	2	8.416330491	1_HTS300	0	0	0	0	0	0	0	0	0	0	0	0	0	0	0	0	0	0	0	0	0	0	0	0	0	0	0	0	0	0	0	0	0	0	0	0	0	1	0
Na	Sr	Mo	SiO2	85	0.2	0.1	0.7	2	12.886254	1_HTS300	0	0	0	0	0	0	0	0	0	0	0	0	0	0	0	0	0	0	0	0	0	0	0	0	0	0	0	0	0	0	0	0	0	0	0	0	0	0	0
Mg	Cu	Sr	SiO2	80	0.566666667	0.283333333	0.15	2	7.306872	1_HTS300	0	0	0	0	0	0	0	0	0	0	0	0	0	0	0	0	0	0	0	0	1	0	0	0	0	0	0	0	0	0	0	0	0	0	0	0	0	0	0
K	Mn	La	SiO2	85	0.4	0.2	0.4	2	8.105403	1_HTS300	0	0	0	0	0	0	0	0	0	0	0	0	0	0	0	0	0	0	0	0	0	0	0	0	0	0	0	0	0	0	0	0	0	1	0	1	0	0	0
Mn	Tb	Hf	CaO	80	0.566666667	0.283333333	0.15	2	8.862521	1_HTS300	0	0	0	0	0	0	0	0	0	0	0	0	0	1	0	0	0	0	0	0	0	0	0	0	0	0	0	0	0	0	0	1	0	0	0	0	0	0	0
Ti	Sr	La	SiO2	85	0.566666667	0.283333333	0.15	2	8.410364008	1_HTS300	0	0	0	0	0	0	0	0	0	0	0	0	0	0	0	0	0	0	0	0	0	0	0	0	0	0	0	0	0	0	0	0	0	0	0	1	0	0	0
Ti	Mo	Nd	SiO2	90	0.728571429	0.121428571	0.15	6	4.547071575	1_HTS300	0	0	0	0	0	0	0	0	0	0	0	0	0	0	0	0	0	0	0	0	0	0	0	0	0	0	0	0	0	0	0	0	0	0	0	0	0	0	0
V	Cs	Nd	SiO2	85	0.566666667	0.283333333	0.15	2	8.0155786	1_HTS300	0	0	0	0	0	0	0	0	0	0	0	0	0	0	0	0	0	0	0	1	0	0	0	0	0	0	0	0	0	0	0	0	0	0	0	0	0	0	0
Mn	Fe	Cu	SiO2	85	0.566666667	0.283333333	0.15	2	7.395275	1_HTS300	0	0	0	0	0	0	0	0	0	0	0	0	0	0	0	0	0	0	0	0	1	0	0	0	0	0	1	0	0	0	0	0	0	0	0	0	0	0	0
Mn	Zn	Sr	SiO2	90	0.2	0.1	0.7	2	10.39965	1_HTS300	0	0	0	0	0	0	0	0	0	0	0	0	0	0	0	0	0	0	0	0	0	0	0	0	0	0	0	0	0	0	0	0	0	0	0	0	0	0	0
Co	Ni	Cu	SiO2	85	0.4	0.2	0.4	2	6.126648	1_HTS300	0	0	0	0	0	0	0	0	0	0	0	0	0	0	0	0	0	1	0	0	1	0	0	0	0	0	0	0	0	0	0	0	0	0	0	0	0	0	0
Co	Y	Nd	SiO2	80	0.566666667	0.283333333	0.15	2	8.70956182	1_HTS300	0	0	0	0	0	0	0	0	0	0	0	0	0	0	0	0	0	1	0	0	0	0	0	0	0	0	0	0	0	0	0	0	0	0	0	0	0	0	0
Ni	W	none	SiO2	70	0.2	0.1	0.7	2	0.6232145	1_HTS300	0	0	0	0	0	0	0	0	0	0	0	0	0	0	0	0	0	0	0	0	0	0	0	0	0	0	0	0	0	0	0	0	0	0	0	0	0	0	0
Cu	La	Tb	SiO2	90	0.4	0.2	0.4	2	3.901878	1_HTS300	0	0	0	0	0	0	0	0	0	0	0	0	0	0	0	0	0	0	0	0	1	0	0	0	0	0	0	0	0	0	0	0	0	0	0	1	0	0	0
Cu	none	none	SiO2	80	0.566666667	0.283333333	0.15	2	8.110494	1_HTS300	0	0	0	0	0	0	0	0	0	0	0	0	0	0	0	0	0	0	0	0	1	0	0	0	0	0	0	0	0	0	0	0	0	0	0	0	0	0	0
Zn	Sr	Pd	SiO2	85	0.2	0.1	0.7	2	1.199864	1_HTS300	0	0	0	0	0	0	0	0	0	0	0	0	0	0	0	0	0	0	0	0	0	0	0	0	0	0	0	0	0	0	0	0	0	0	0	0	0	0	0
Zr	Cs	Cs	SiO2	90	0.728571429	0.121428571	0.15	6	2.490951	1_HTS300	0	0	0	0	0	0	0	0	0	0	0	0	0	0	0	0	0	0	0	2	0	0	0	0	0	0	0	0	0	0	0	0	0	0	0	0	0	0	0
Mo	Ba	none	SiO2	85	0.4	0.2	0.4	2	8.501991	1_HTS300	0	0	0	0	0	0	1	0	0	0	0	0	0	0	0	0	0	0	0	0	0	0	0	0	0	0	0	0	0	0	0	0	0	0	0	0	0	0	0
Cs	Ba	Ce	SiO2	85	0.2	0.1	0.7	2	7.794678	1_HTS300	0	0	0	0	0	0	1	0	0	0	0	0	0	0	0	1	0	0	0	1	0	0	0	0	0	0	0	0	0	0	0	0	0	0	0	0	0	0	0
Li	V	Eu	CaO	85	0.2	0.1	0.7	2	13.643583	1_HTS300	0	0	0	0	0	0	0	0	0	0	0	0	0	1	0	0	0	0	0	0	0	0	0	0	1	0	0	0	0	0	0	0	0	0	0	0	0	1	0
Li	Co	Mo	CaO	75	0.566666667	0.283333333	0.15	2	4.800301	1_HTS300	0	0	0	0	0	0	0	0	0	0	0	0	0	1	0	0	0	1	0	0	0	0	0	0	0	0	0	0	0	0	0	0	0	0	0	0	0	1	0
Li	Cu	Cs	CaO	90	0.566666667	0.283333333	0.15	2	5.606295545	1_HTS300	0	0	0	0	0	0	0	0	0	0	0	0	0	1	0	0	0	0	0	1	1	0	0	0	0	0	0	0	0	0	0	0	0	0	0	0	0	1	0
Na	Mg	Hf	CaO	75	0.4	0.2	0.4	2	14.29566731	1_HTS300	0	0	0	0	0	0	0	0	0	0	0	0	0	1	0	0	0	0	0	0	0	0	0	0	0	0	0	0	0	0	0	1	0	0	0	0	0	0	0
Na	Ti	Ce	CaO	70	0.566666667	0.283333333	0.15	2	11.88124779	1_HTS300	0	0	0	0	0	0	0	0	0	0	0	0	0	1	0	1	0	0	0	0	0	0	0	0	0	0	0	0	0	0	0	0	0	0	0	0	0	0	0
Na	Mn	La	CaO	80	0.566666667	0.283333333	0.15	2	6.729278	1_HTS300	0	0	0	0	0	0	0	0	0	0	0	0	0	1	0	0	0	0	0	0	0	0	0	0	0	0	0	0	0	0	0	0	0	0	0	1	0	0	0
Na	Cu	Hf	CaO	80	0.566666667	0.283333333	0.15	2	4.165327518	1_HTS300	0	0	0	0	0	0	0	0	0	0	0	0	0	1	0	0	0	0	0	0	1	0	0	0	0	0	0	0	0	0	0	1	0	0	0	0	0	0	0
Mg	Co	Ce	CaO	80	0.566666667	0.283333333	0.15	2	7.998322	1_HTS300	0	0	0	0	0	0	0	0	0	0	0	0	0	1	0	1	0	1	0	0	0	0	0	0	0	0	0	0	0	0	0	0	0	0	0	0	0	0	0
Mg	Cu	Eu	CaO	90	0.566666667	0.283333333	0.15	2	4.602352	1_HTS300	0	0	0	0	0	0	0	0	0	0	0	0	0	1	0	0	0	0	0	0	1	0	0	0	1	0	0	0	0	0	0	0	0	0	0	0	0	0	0
Mg	Sr	Y	CaO	80	0.4	0.2	0.4	2	14.420646	1_HTS300	0	0	0	0	0	0	0	0	0	0	0	0	0	1	0	0	0	0	0	0	0	0	0	0	0	0	0	0	0	0	0	0	0	0	0	0	0	0	0
Mg	Sr	Ba	CaO	80	0.2	0.1	0.7	2	17.44742458	1_HTS300	0	0	0	0	0	0	1	0	0	0	0	0	0	1	0	0	0	0	0	0	0	0	0	0	0	0	0	0	0	0	0	0	0	0	0	0	0	0	0
Mg	Zr	Hf	CaO	75	0.566666667	0.283333333	0.15	2	15.94907133	1_HTS300	0	0	0	0	0	0	0	0	0	0	0	0	0	1	0	0	0	0	0	0	0	0	0	0	0	0	0	0	0	0	0	1	0	0	0	0	0	0	0
K	Sr	Y	CaO	70	0.4	0.2	0.4	2	9.865932	1_HTS300	0	0	0	0	0	0	0	0	0	0	0	0	0	1	0	0	0	0	0	0	0	0	0	0	0	0	0	0	0	0	0	0	0	1	0	0	0	0	0
K	Y	Eu	CaO	75	0.566666667	0.283333333	0.15	2	13.052708	1_HTS300	0	0	0	0	0	0	0	0	0	0	0	0	0	1	0	0	0	0	0	0	0	0	0	0	1	0	0	0	0	0	0	0	0	1	0	0	0	0	0
Ca	Mn	none	CaO	85	0.566666667	0.283333333	0.15	2	7.555964161	1_HTS300	0	0	0	0	0	0	0	0	0	0	0	0	1	1	0	0	0	0	0	0	0	0	0	0	0	0	0	0	0	0	0	0	0	0	0	0	0	0	0
Ca	Nd	Tb	CaO	85	0.566666667	0.283333333	0.15	2	7.20359	1_HTS300	0	0	0	0	0	0	0	0	0	0	0	0	1	1	0	0	0	0	0	0	0	0	0	0	0	0	0	0	0	0	0	0	0	0	0	0	0	0	0
Ti	Fe	Sr	CaO	70	0.566666667	0.283333333	0.15	2	10.27215963	1_HTS300	0	0	0	0	0	0	0	0	0	0	0	0	0	1	0	0	0	0	0	0	0	0	0	0	0	0	1	0	0	0	0	0	0	0	0	0	0	0	0
Ti	Zn	Tb	CaO	70	0.566666667	0.283333333	0.15	2	12.470184	1_HTS300	0	0	0	0	0	0	0	0	0	0	0	0	0	1	0	0	0	0	0	0	0	0	0	0	0	0	0	0	0	0	0	0	0	0	0	0	0	0	0
Ti	Cs	Ce	CaO	70	0.566666667	0.283333333	0.15	2	15.36752859	1_HTS300	0	0	0	0	0	0	0	0	0	0	0	0	0	1	0	1	0	0	0	1	0	0	0	0	0	0	0	0	0	0	0	0	0	0	0	0	0	0	0
V	Pd	W	CaO	90	0.257142857	0.042857143	0.7	6	0.55071388	1_HTS300	0	0	0	0	0	0	0	0	0	0	0	0	0	1	0	0	0	0	0	0	0	0	0	0	0	0	0	0	0	0	0	0	0	0	0	0	0	0	0
V	Ce	Hf	CaO	75	0.566666667	0.283333333	0.15	2	12.27420794	1_HTS300	0	0	0	0	0	0	0	0	0	0	0	0	0	1	0	1	0	0	0	0	0	0	0	0	0	0	0	0	0	0	0	1	0	0	0	0	0	0	0
Mn	Fe	Hf	CaO	80	0.566666667	0.283333333	0.15	2	7.68089657	1_HTS300	0	0	0	0	0	0	0	0	0	0	0	0	0	1	0	0	0	0	0	0	0	0	0	0	0	0	1	0	0	0	0	1	0	0	0	0	0	0	0
Fe	Y	Tb	CaO	75	0.566666667	0.283333333	0.15	2	9.366928	1_HTS300	0	0	0	0	0	0	0	0	0	0	0	0	0	1	0	0	0	0	0	0	0	0	0	0	0	0	1	0	0	0	0	0	0	0	0	0	0	0	0
Fe	Ba	Ce	CaO	75	0.566666667	0.283333333	0.15	2	11.622263	1_HTS300	0	0	0	0	0	0	1	0	0	0	0	0	0	1	0	1	0	0	0	0	0	0	0	0	0	0	1	0	0	0	0	0	0	0	0	0	0	0	0
Co	Cu	Nd	CaO	90	0.566666667	0.283333333	0.15	2	3.215459	1_HTS300	0	0	0	0	0	0	0	0	0	0	0	0	0	1	0	0	0	1	0	0	1	0	0	0	0	0	0	0	0	0	0	0	0	0	0	0	0	0	0
Sr	Cs	La	CaO	75	0.68	0.17	0.15	4	7.960522	1_HTS300	0	0	0	0	0	0	0	0	0	0	0	0	0	1	0	0	0	0	0	1	0	0	0	0	0	0	0	0	0	0	0	0	0	0	0	1	0	0	0
Li	Fe	Hf	MgO	90	0.566666667	0.283333333	0.15	2	2.480222	1_HTS300	0	0	0	0	0	0	0	0	0	0	0	0	0	0	0	0	0	0	0	0	0	0	0	0	0	0	1	0	0	0	0	1	0	0	0	0	0	1	0
Y	Mo	Nd	CaO	80	0.4	0.2	0.4	2	13.23374	1_HTS300	0	0	0	0	0	0	0	0	0	0	0	0	0	1	0	0	0	0	0	0	0	0	0	0	0	0	0	0	0	0	0	0	0	0	0	0	0	0	0
Ba	Eu	none	CaO	75	0.566666667	0.283333333	0.15	2	16.951361	1_HTS300	0	0	0	0	0	0	1	0	0	0	0	0	0	1	0	0	0	0	0	0	0	0	0	0	1	0	0	0	0	0	0	0	0	0	0	0	0	0	0
Li	Ti	V	TiO2	85	0.566666667	0.283333333	0.15	2	8.404034807	1_HTS300	0	0	0	0	0	0	0	0	0	0	0	0	0	0	0	0	0	0	0	0	0	0	0	0	0	0	0	0	0	0	0	0	0	0	0	0	0	1	0
Li	Fe	Ce	TiO2	90	0.2	0.1	0.7	2	11.574851	1_HTS300	0	0	0	0	0	0	0	0	0	0	0	0	0	0	0	1	0	0	0	0	0	0	0	0	0	0	1	0	0	0	0	0	0	0	0	0	0	1	0
Li	Zn	Pd	TiO2	85	0.566666667	0.283333333	0.15	2	7.49431	1_HTS300	0	0	0	0	0	0	0	0	0	0	0	0	0	0	0	0	0	0	0	0	0	0	0	0	0	0	0	0	0	0	0	0	0	0	0	0	0	1	0
Na	Fe	Pd	TiO2	85	0.566666667	0.283333333	0.15	2	2.105925	1_HTS300	0	0	0	0	0	0	0	0	0	0	0	0	0	0	0	0	0	0	0	0	0	0	0	0	0	0	1	0	0	0	0	0	0	0	0	0	0	0	0
Mg	Mn	Ce	TiO2	85	0.2	0.1	0.7	2	14.215056	1_HTS300	0	0	0	0	0	0	0	0	0	0	0	0	0	0	0	1	0	0	0	0	0	0	0	0	0	0	0	0	0	0	0	0	0	0	0	0	0	0	0
Mg	Sr	Tb	TiO2	90	0.2	0.1	0.7	2	10.335693	1_HTS300	0	0	0	0	0	0	0	0	0	0	0	0	0	0	0	0	0	0	0	0	0	0	0	0	0	0	0	0	0	0	0	0	0	0	0	0	0	0	0
Ca	V	Y	TiO2	80	0.4	0.2	0.4	2	8.56577926	1_HTS300	0	0	0	0	0	0	0	0	0	0	0	0	1	0	0	0	0	0	0	0	0	0	0	0	0	0	0	0	0	0	0	0	0	0	0	0	0	0	0
Ti	Zn	La	TiO2	80	0.4	0.2	0.4	2	10.37928732	1_HTS300	0	0	0	0	0	0	0	0	0	0	0	0	0	0	0	0	0	0	0	0	0	0	0	0	0	0	0	0	0	0	0	0	0	0	0	1	0	0	0
Ti	Zr	Ce	TiO2	80	0.4	0.2	0.4	2	15.19058847	1_HTS300	0	0	0	0	0	0	0	0	0	0	0	0	0	0	0	1	0	0	0	0	0	0	0	0	0	0	0	0	0	0	0	0	0	0	0	0	0	0	0
Ti	Cs	W	TiO2	75	0.4	0.2	0.4	2	16.590409	1_HTS300	0	0	0	0	0	0	0	0	0	0	0	0	0	0	0	0	0	0	0	1	0	0	0	0	0	0	0	0	0	0	0	0	0	0	0	0	0	0	0
V	Co	La	TiO2	80	0.566666667	0.283333333	0.15	2	8.128174	1_HTS300	0	0	0	0	0	0	0	0	0	0	0	0	0	0	0	0	0	1	0	0	0	0	0	0	0	0	0	0	0	0	0	0	0	0	0	1	0	0	0
V	Co	Ce	TiO2	70	0.566666667	0.283333333	0.15	2	5.479716989	1_HTS300	0	0	0	0	0	0	0	0	0	0	0	0	0	0	0	1	0	1	0	0	0	0	0	0	0	0	0	0	0	0	0	0	0	0	0	0	0	0	0
V	Ni	Zn	TiO2	80	0.566666667	0.283333333	0.15	2	6.113688	1_HTS300	0	0	0	0	0	0	0	0	0	0	0	0	0	0	0	0	0	0	0	0	0	0	0	0	0	0	0	0	0	0	0	0	0	0	0	0	0	0	0
Mn	Fe	Nd	TiO2	75	0.4	0.2	0.4	2	9.424678417	1_HTS300	0	0	0	0	0	0	0	0	0	0	0	0	0	0	0	0	0	0	0	0	0	0	0	0	0	0	1	0	0	0	0	0	0	0	0	0	0	0	0
Mn	Cu	Sr	TiO2	85	0.68	0.17	0.15	4	8.174712	1_HTS300	0	0	0	0	0	0	0	0	0	0	0	0	0	0	0	0	0	0	0	0	1	0	0	0	0	0	0	0	0	0	0	0	0	0	0	0	0	0	0
Mn	Nd	W	TiO2	90	0.4	0.2	0.4	2	7.902746	1_HTS300	0	0	0	0	0	0	0	0	0	0	0	0	0	0	0	0	0	0	0	0	0	0	0	0	0	0	0	0	0	0	0	0	0	0	0	0	0	0	0
Fe	Cu	Sr	TiO2	85	0.566666667	0.283333333	0.15	2	8.201472	1_HTS300	0	0	0	0	0	0	0	0	0	0	0	0	0	0	0	0	0	0	0	0	1	0	0	0	0	0	1	0	0	0	0	0	0	0	0	0	0	0	0
Fe	Zn	W	TiO2	85	0.68	0.17	0.15	4	15.432585	1_HTS300	0	0	0	0	0	0	0	0	0	0	0	0	0	0	0	0	0	0	0	0	0	0	0	0	0	0	1	0	0	0	0	0	0	0	0	0	0	0	0
Fe	Sr	Mo	TiO2	80	0.566666667	0.283333333	0.15	2	8.255974	1_HTS300	0	0	0	0	0	0	0	0	0	0	0	0	0	0	0	0	0	0	0	0	0	0	0	0	0	0	1	0	0	0	0	0	0	0	0	0	0	0	0
Co	Sr	Hf	TiO2	80	0.566666667	0.283333333	0.15	2	13.73599169	1_HTS300	0	0	0	0	0	0	0	0	0	0	0	0	0	0	0	0	0	1	0	0	0	0	0	0	0	0	0	0	0	0	0	1	0	0	0	0	0	0	0
Ni	Zn	La	TiO2	75	0.24	0.06	0.7	4	2.134821	1_HTS300	0	0	0	0	0	0	0	0	0	0	0	0	0	0	0	0	0	0	0	0	0	0	0	0	0	0	0	0	0	0	0	0	0	0	0	1	0	0	0
Ni	Ce	W	TiO2	75	0.566666667	0.283333333	0.15	2	9.223072528	1_HTS300	0	0	0	0	0	0	0	0	0	0	0	0	0	0	0	1	0	0	0	0	0	0	0	0	0	0	0	0	0	0	0	0	0	0	0	0	0	0	0
Cu	Zr	Tb	TiO2	85	0.566666667	0.283333333	0.15	2	7.410794	1_HTS300	0	0	0	0	0	0	0	0	0	0	0	0	0	0	0	0	0	0	0	0	1	0	0	0	0	0	0	0	0	0	0	0	0	0	0	0	0	0	0
Cu	Mo	Ce	TiO2	80	0.4	0.2	0.4	2	15.274742	1_HTS300	0	0	0	0	0	0	0	0	0	0	0	0	0	0	0	1	0	0	0	0	1	0	0	0	0	0	0	0	0	0	0	0	0	0	0	0	0	0	0
Cu	La	Tb	TiO2	85	0.4	0.2	0.4	2	10.297495	1_HTS300	0	0	0	0	0	0	0	0	0	0	0	0	0	0	0	0	0	0	0	0	1	0	0	0	0	0	0	0	0	0	0	0	0	0	0	1	0	0	0
Cu	Eu	Eu	TiO2	80	0.566666667	0.283333333	0.15	2	5.909738	1_HTS300	0	0	0	0	0	0	0	0	0	0	0	0	0	0	0	0	0	0	0	0	1	0	0	0	2	0	0	0	0	0	0	0	0	0	0	0	0	0	0
Zn	Zn	Nd	TiO2	85	0.68	0.17	0.15	4	11.380061	1_HTS300	0	0	0	0	0	0	0	0	0	0	0	0	0	0	0	0	0	0	0	0	0	0	0	0	0	0	0	0	0	0	0	0	0	0	0	0	0	0	0
Zn	Zr	Tb	TiO2	85	0.2	0.1	0.7	2	12.93759708	1_HTS300	0	0	0	0	0	0	0	0	0	0	0	0	0	0	0	0	0	0	0	0	0	0	0	0	0	0	0	0	0	0	0	0	0	0	0	0	0	0	0
Y	Cs	Ce	TiO2	85	0.4	0.2	0.4	2	12.438439	1_HTS300	0	0	0	0	0	0	0	0	0	0	0	0	0	0	0	1	0	0	0	1	0	0	0	0	0	0	0	0	0	0	0	0	0	0	0	0	0	0	0
Y	Nd	Tb	TiO2	85	0.566666667	0.283333333	0.15	2	8.665363	1_HTS300	0	0	0	0	0	0	0	0	0	0	0	0	0	0	0	0	0	0	0	0	0	0	0	0	0	0	0	0	0	0	0	0	0	0	0	0	0	0	0
Mo	Ba	Ce	TiO2	85	0.2	0.1	0.7	2	15.444334	1_HTS300	0	0	0	0	0	0	1	0	0	0	0	0	0	0	0	1	0	0	0	0	0	0	0	0	0	0	0	0	0	0	0	0	0	0	0	0	0	0	0
Mo	Ce	Nd	TiO2	90	0.2	0.1	0.7	2	6.977446	1_HTS300	0	0	0	0	0	0	0	0	0	0	0	0	0	0	0	1	0	0	0	0	0	0	0	0	0	0	0	0	0	0	0	0	0	0	0	0	0	0	0
Mo	Ce	W	TiO2	85	0.566666667	0.283333333	0.15	2	8.749742389	1_HTS300	0	0	0	0	0	0	0	0	0	0	0	0	0	0	0	1	0	0	0	0	0	0	0	0	0	0	0	0	0	0	0	0	0	0	0	0	0	0	0
Cs	Ba	Eu	TiO2	80	0.566666667	0.283333333	0.15	2	13.32673682	1_HTS300	0	0	0	0	0	0	1	0	0	0	0	0	0	0	0	0	0	0	0	1	0	0	0	0	1	0	0	0	0	0	0	0	0	0	0	0	0	0	0
Li	Ca	Ca	ZrO2	85	0.566666667	0.283333333	0.15	2	1.330861	1_HTS300	0	0	0	0	0	0	0	0	0	0	0	0	2	0	0	0	0	0	0	0	0	0	0	0	0	0	0	0	0	0	0	0	0	0	0	0	0	1	0
Li	Mo	Nd	ZrO2	70	0.4	0.2	0.4	2	16.688445	1_HTS300	0	0	0	0	0	0	0	0	0	0	0	0	0	0	0	0	0	0	0	0	0	0	0	0	0	0	0	0	0	0	0	0	0	0	0	0	0	1	0
Li	Ba	Nd	ZrO2	90	0.24	0.06	0.7	4	1.136416	1_HTS300	0	0	0	0	0	0	1	0	0	0	0	0	0	0	0	0	0	0	0	0	0	0	0	0	0	0	0	0	0	0	0	0	0	0	0	0	0	1	0
Li	La	Eu	ZrO2	80	0.566666667	0.283333333	0.15	2	6.28277863	1_HTS300	0	0	0	0	0	0	0	0	0	0	0	0	0	0	0	0	0	0	0	0	0	0	0	0	1	0	0	0	0	0	0	0	0	0	0	1	0	1	0
Na	Ba	Nd	ZrO2	75	0.566666667	0.283333333	0.15	2	10.535837	1_HTS300	0	0	0	0	0	0	1	0	0	0	0	0	0	0	0	0	0	0	0	0	0	0	0	0	0	0	0	0	0	0	0	0	0	0	0	0	0	0	0
Na	Eu	W	ZrO2	85	0.2	0.1	0.7	2	18.20442619	1_HTS300	0	0	0	0	0	0	0	0	0	0	0	0	0	0	0	0	0	0	0	0	0	0	0	0	1	0	0	0	0	0	0	0	0	0	0	0	0	0	0
Mg	V	Hf	ZrO2	85	0.566666667	0.283333333	0.15	2	3.175956	1_HTS300	0	0	0	0	0	0	0	0	0	0	0	0	0	0	0	0	0	0	0	0	0	0	0	0	0	0	0	0	0	0	0	1	0	0	0	0	0	0	0
Mg	Zr	W	ZrO2	85	0.2	0.1	0.7	2	9.637352	1_HTS300	0	0	0	0	0	0	0	0	0	0	0	0	0	0	0	0	0	0	0	0	0	0	0	0	0	0	0	0	0	0	0	0	0	0	0	0	0	0	0
K	Ba	Nd	ZrO2	70	0.4	0.2	0.4	2	8.478216621	1_HTS300	0	0	0	0	0	0	1	0	0	0	0	0	0	0	0	0	0	0	0	0	0	0	0	0	0	0	0	0	0	0	0	0	0	1	0	0	0	0	0
Ca	V	Cu	ZrO2	80	0.566666667	0.283333333	0.15	2	7.032775144	1_HTS300	0	0	0	0	0	0	0	0	0	0	0	0	1	0	0	0	0	0	0	0	1	0	0	0	0	0	0	0	0	0	0	0	0	0	0	0	0	0	0
Ca	Ni	Cu	ZrO2	75	0.566666667	0.283333333	0.15	2	6.329209	1_HTS300	0	0	0	0	0	0	0	0	0	0	0	0	1	0	0	0	0	0	0	0	1	0	0	0	0	0	0	0	0	0	0	0	0	0	0	0	0	0	0
Ca	Sr	Zr	ZrO2	70	0.4	0.2	0.4	2	10.43980175	1_HTS300	0	0	0	0	0	0	0	0	0	0	0	0	1	0	0	0	0	0	0	0	0	0	0	0	0	0	0	0	0	0	0	0	0	0	0	0	0	0	0
V	Mn	W	ZrO2	85	0.566666667	0.283333333	0.15	2	7.834854974	1_HTS300	0	0	0	0	0	0	0	0	0	0	0	0	0	0	0	0	0	0	0	0	0	0	0	0	0	0	0	0	0	0	0	0	0	0	0	0	0	0	0
Mn	Ba	none	ZrO2	75	0.566666667	0.283333333	0.15	2	5.449057435	1_HTS300	0	0	0	0	0	0	1	0	0	0	0	0	0	0	0	0	0	0	0	0	0	0	0	0	0	0	0	0	0	0	0	0	0	0	0	0	0	0	0
Mn	Tb	Hf	ZrO2	85	0.2	0.1	0.7	2	1.403385	1_HTS300	0	0	0	0	0	0	0	0	0	0	0	0	0	0	0	0	0	0	0	0	0	0	0	0	0	0	0	0	0	0	0	1	0	0	0	0	0	0	0
Fe	Cu	Zr	ZrO2	85	0.566666667	0.283333333	0.15	2	6.114935	1_HTS300	0	0	0	0	0	0	0	0	0	0	0	0	0	0	0	0	0	0	0	0	1	0	0	0	0	0	1	0	0	0	0	0	0	0	0	0	0	0	0
Ni	Cs	Ba	ZrO2	70	0.4	0.2	0.4	2	1.161530021	1_HTS300	0	0	0	0	0	0	1	0	0	0	0	0	0	0	0	0	0	0	0	1	0	0	0	0	0	0	0	0	0	0	0	0	0	0	0	0	0	0	0
Zn	La	Ce	ZrO2	90	0.566666667	0.283333333	0.15	2	3.441771	1_HTS300	0	0	0	0	0	0	0	0	0	0	0	0	0	0	0	1	0	0	0	0	0	0	0	0	0	0	0	0	0	0	0	0	0	0	0	1	0	0	0
Y	Mo	Nd	ZrO2	80	0.566666667	0.283333333	0.15	2	7.375684538	1_HTS300	0	0	0	0	0	0	0	0	0	0	0	0	0	0	0	0	0	0	0	0	0	0	0	0	0	0	0	0	0	0	0	0	0	0	0	0	0	0	0
Li	Mg	Zr	BaO	80	0.2	0.1	0.7	2	18.61456508	1_HTS300	0	0	0	0	0	0	0	1	0	0	0	0	0	0	0	0	0	0	0	0	0	0	0	0	0	0	0	0	0	0	0	0	0	0	0	0	0	1	0
Li	Co	Zn	BaO	90	0.2	0.1	0.7	2	6.217331	1_HTS300	0	0	0	0	0	0	0	1	0	0	0	0	0	0	0	0	0	1	0	0	0	0	0	0	0	0	0	0	0	0	0	0	0	0	0	0	0	1	0
Li	Co	Nd	BaO	90	0.68	0.17	0.15	4	7.123435	1_HTS300	0	0	0	0	0	0	0	1	0	0	0	0	0	0	0	0	0	1	0	0	0	0	0	0	0	0	0	0	0	0	0	0	0	0	0	0	0	1	0
Li	Co	Eu	BaO	80	0.566666667	0.283333333	0.15	2	13.7725198	1_HTS300	0	0	0	0	0	0	0	1	0	0	0	0	0	0	0	0	0	1	0	0	0	0	0	0	1	0	0	0	0	0	0	0	0	0	0	0	0	1	0
Li	Zr	Cs	BaO	85	0.2	0.1	0.7	2	16.43846824	1_HTS300	0	0	0	0	0	0	0	1	0	0	0	0	0	0	0	0	0	0	0	1	0	0	0	0	0	0	0	0	0	0	0	0	0	0	0	0	0	1	0
Na	Ca	Mn	BaO	80	0.4	0.2	0.4	2	9.029411	1_HTS300	0	0	0	0	0	0	0	1	0	0	0	0	1	0	0	0	0	0	0	0	0	0	0	0	0	0	0	0	0	0	0	0	0	0	0	0	0	0	0
Na	Fe	Ce	BaO	85	0.4	0.2	0.4	2	9.299244	1_HTS300	0	0	0	0	0	0	0	1	0	0	0	0	0	0	0	1	0	0	0	0	0	0	0	0	0	0	1	0	0	0	0	0	0	0	0	0	0	0	0
Mg	K	Y	BaO	85	0.2	0.1	0.7	2	16.971192	1_HTS300	0	0	0	0	0	0	0	1	0	0	0	0	0	0	0	0	0	0	0	0	0	0	0	0	0	0	0	0	0	0	0	0	0	1	0	0	0	0	0
Mg	V	Mn	BaO	75	0.566666667	0.283333333	0.15	2	10.21741072	1_HTS300	0	0	0	0	0	0	0	1	0	0	0	0	0	0	0	0	0	0	0	0	0	0	0	0	0	0	0	0	0	0	0	0	0	0	0	0	0	0	0
Mg	Mn	Ni	BaO	85	0.2	0.1	0.7	2	8.715181007	1_HTS300	0	0	0	0	0	0	0	1	0	0	0	0	0	0	0	0	0	0	0	0	0	0	0	0	0	0	0	0	0	0	0	0	0	0	0	0	0	0	0
Mg	Pd	none	BaO	90	0.257142857	0.042857143	0.7	6	0.836177	1_HTS300	0	0	0	0	0	0	0	1	0	0	0	0	0	0	0	0	0	0	0	0	0	0	0	0	0	0	0	0	0	0	0	0	0	0	0	0	0	0	0
K	Ca	Zr	BaO	85	0.2	0.1	0.7	2	13.65483	1_HTS300	0	0	0	0	0	0	0	1	0	0	0	0	1	0	0	0	0	0	0	0	0	0	0	0	0	0	0	0	0	0	0	0	0	1	0	0	0	0	0
K	V	Mo	BaO	85	0.2	0.1	0.7	2	18.53286096	1_HTS300	0	0	0	0	0	0	0	1	0	0	0	0	0	0	0	0	0	0	0	0	0	0	0	0	0	0	0	0	0	0	0	0	0	1	0	0	0	0	0
K	Zr	La	BaO	80	0.2	0.1	0.7	2	17.51343246	1_HTS300	0	0	0	0	0	0	0	1	0	0	0	0	0	0	0	0	0	0	0	0	0	0	0	0	0	0	0	0	0	0	0	0	0	1	0	1	0	0	0
Ca	Mn	Mo	BaO	85	0.4	0.2	0.4	2	10.301145	1_HTS300	0	0	0	0	0	0	0	1	0	0	0	0	1	0	0	0	0	0	0	0	0	0	0	0	0	0	0	0	0	0	0	0	0	0	0	0	0	0	0
Ca	Y	Zr	BaO	80	0.4	0.2	0.4	2	10.955218	1_HTS300	0	0	0	0	0	0	0	1	0	0	0	0	1	0	0	0	0	0	0	0	0	0	0	0	0	0	0	0	0	0	0	0	0	0	0	0	0	0	0
V	Mn	Cu	BaO	85	0.566666667	0.283333333	0.15	2	9.948276454	1_HTS300	0	0	0	0	0	0	0	1	0	0	0	0	0	0	0	0	0	0	0	0	1	0	0	0	0	0	0	0	0	0	0	0	0	0	0	0	0	0	0
V	Fe	none	BaO	85	0.68	0.17	0.15	4	13.868476	1_HTS300	0	0	0	0	0	0	0	1	0	0	0	0	0	0	0	0	0	0	0	0	0	0	0	0	0	0	1	0	0	0	0	0	0	0	0	0	0	0	0
V	Zr	Eu	BaO	90	0.2	0.1	0.7	2	12.88363812	1_HTS300	0	0	0	0	0	0	0	1	0	0	0	0	0	0	0	0	0	0	0	0	0	0	0	0	1	0	0	0	0	0	0	0	0	0	0	0	0	0	0
Fe	Ba	La	BaO	85	0.2	0.1	0.7	2	14.109229	1_HTS300	0	0	0	0	0	0	1	1	0	0	0	0	0	0	0	0	0	0	0	0	0	0	0	0	0	0	1	0	0	0	0	0	0	0	0	1	0	0	0
Co	Zn	Zr	BaO	90	0.2	0.1	0.7	2	12.42244625	1_HTS300	0	0	0	0	0	0	0	1	0	0	0	0	0	0	0	0	0	1	0	0	0	0	0	0	0	0	0	0	0	0	0	0	0	0	0	0	0	0	0
Zn	Hf	none	BaO	85	0.2	0.1	0.7	2	16.85489026	1_HTS300	0	0	0	0	0	0	0	1	0	0	0	0	0	0	0	0	0	0	0	0	0	0	0	0	0	0	0	0	0	0	0	1	0	0	0	0	0	0	0
Sr	Mo	none	BaO	85	0.2	0.1	0.7	2	21.23686236	1_HTS300	0	0	0	0	0	0	0	1	0	0	0	0	0	0	0	0	0	0	0	0	0	0	0	0	0	0	0	0	0	0	0	0	0	0	0	0	0	0	0
Mo	Cs	W	BaO	85	0.2	0.1	0.7	2	20.18585012	1_HTS300	0	0	0	0	0	0	0	1	0	0	0	0	0	0	0	0	0	0	0	1	0	0	0	0	0	0	0	0	0	0	0	0	0	0	0	0	0	0	0
Ce	Nd	Hf	BaO	80	0.566666667	0.283333333	0.15	2	15.22270207	1_HTS300	0	0	0	0	0	0	0	1	0	0	0	0	0	0	0	1	0	0	0	0	0	0	0	0	0	0	0	0	0	0	0	1	0	0	0	0	0	0	0
Li	Fe	Ba	La2O3	70	0.566666667	0.283333333	0.15	2	15.246033	1_HTS300	0	0	0	0	0	0	1	0	0	0	0	0	0	0	0	0	0	0	0	0	0	0	0	0	0	0	1	0	0	0	0	0	0	0	0	0	1	1	0
Li	Y	Eu	La2O3	70	0.566666667	0.283333333	0.15	2	15.38756192	1_HTS300	0	0	0	0	0	0	0	0	0	0	0	0	0	0	0	0	0	0	0	0	0	0	0	0	1	0	0	0	0	0	0	0	0	0	0	0	1	1	0
Li	Ba	La	La2O3	75	0.4	0.2	0.4	2	14.954234	1_HTS300	0	0	0	0	0	0	1	0	0	0	0	0	0	0	0	0	0	0	0	0	0	0	0	0	0	0	0	0	0	0	0	0	0	0	0	1	1	1	0
Li	Nd	Tb	La2O3	70	0.566666667	0.283333333	0.15	2	10.317098	1_HTS300	0	0	0	0	0	0	0	0	0	0	0	0	0	0	0	0	0	0	0	0	0	0	0	0	0	0	0	0	0	0	0	0	0	0	0	0	1	1	0
Na	Ca	none	La2O3	70	0.566666667	0.283333333	0.15	2	15.3747797	1_HTS300	0	0	0	0	0	0	0	0	0	0	0	0	1	0	0	0	0	0	0	0	0	0	0	0	0	0	0	0	0	0	0	0	0	0	0	0	1	0	0
Na	Fe	Tb	La2O3	85	0.566666667	0.283333333	0.15	2	7.48906	1_HTS300	0	0	0	0	0	0	0	0	0	0	0	0	0	0	0	0	0	0	0	0	0	0	0	0	0	0	1	0	0	0	0	0	0	0	0	0	1	0	0
Mg	K	Fe	La2O3	75	0.68	0.17	0.15	4	11.08413	1_HTS300	0	0	0	0	0	0	0	0	0	0	0	0	0	0	0	0	0	0	0	0	0	0	0	0	0	0	1	0	0	0	0	0	0	1	0	0	1	0	0
Mg	Ca	Nd	La2O3	75	0.4	0.2	0.4	2	16.170253	1_HTS300	0	0	0	0	0	0	0	0	0	0	0	0	1	0	0	0	0	0	0	0	0	0	0	0	0	0	0	0	0	0	0	0	0	0	0	0	1	0	0
K	Co	Ce	La2O3	80	0.566666667	0.283333333	0.15	2	2.373654029	1_HTS300	0	0	0	0	0	0	0	0	0	0	0	0	0	0	0	1	0	1	0	0	0	0	0	0	0	0	0	0	0	0	0	0	0	1	0	0	1	0	0
K	Cu	none	La2O3	85	0.566666667	0.283333333	0.15	2	7.517418	1_HTS300	0	0	0	0	0	0	0	0	0	0	0	0	0	0	0	0	0	0	0	0	1	0	0	0	0	0	0	0	0	0	0	0	0	1	0	0	1	0	0
K	none	none	La2O3	80	0.566666667	0.283333333	0.15	2	7.933804	1_HTS300	0	0	0	0	0	0	0	0	0	0	0	0	0	0	0	0	0	0	0	0	0	0	0	0	0	0	0	0	0	0	0	0	0	1	0	0	1	0	0
Ca	Mn	Sr	La2O3	70	0.566666667	0.283333333	0.15	2	10.643704	1_HTS300	0	0	0	0	0	0	0	0	0	0	0	0	1	0	0	0	0	0	0	0	0	0	0	0	0	0	0	0	0	0	0	0	0	0	0	0	1	0	0
Ca	Fe	Tb	La2O3	75	0.566666667	0.283333333	0.15	2	12.271202	1_HTS300	0	0	0	0	0	0	0	0	0	0	0	0	1	0	0	0	0	0	0	0	0	0	0	0	0	0	1	0	0	0	0	0	0	0	0	0	1	0	0
Ti	Co	Cu	La2O3	90	0.728571429	0.121428572	0.15	6	1.298072	1_HTS300	0	0	0	0	0	0	0	0	0	0	0	0	0	0	0	0	0	1	0	0	1	0	0	0	0	0	0	0	0	0	0	0	0	0	0	0	1	0	0
Ti	Co	Pd	La2O3	70	0.4	0.2	0.4	2	0.472979271	1_HTS300	0	0	0	0	0	0	0	0	0	0	0	0	0	0	0	0	0	1	0	0	0	0	0	0	0	0	0	0	0	0	0	0	0	0	0	0	1	0	0
Ti	Zr	Ba	La2O3	70	0.566666667	0.283333333	0.15	2	4.109466	1_HTS300	0	0	0	0	0	0	1	0	0	0	0	0	0	0	0	0	0	0	0	0	0	0	0	0	0	0	0	0	0	0	0	0	0	0	0	0	1	0	0
V	Fe	Mo	La2O3	80	0.566666667	0.283333333	0.15	2	7.698	1_HTS300	0	0	0	0	0	0	0	0	0	0	0	0	0	0	0	0	0	0	0	0	0	0	0	0	0	0	1	0	0	0	0	0	0	0	0	0	1	0	0
V	Mo	none	La2O3	90	0.2	0.1	0.7	2	14.855785	1_HTS300	0	0	0	0	0	0	0	0	0	0	0	0	0	0	0	0	0	0	0	0	0	0	0	0	0	0	0	0	0	0	0	0	0	0	0	0	1	0	0
V	La	W	La2O3	85	0.2	0.1	0.7	2	14.120749	1_HTS300	0	0	0	0	0	0	0	0	0	0	0	0	0	0	0	0	0	0	0	0	0	0	0	0	0	0	0	0	0	0	0	0	0	0	0	1	1	0	0
V	Ce	Nd	La2O3	70	0.566666667	0.283333333	0.15	2	8.367042652	1_HTS300	0	0	0	0	0	0	0	0	0	0	0	0	0	0	0	1	0	0	0	0	0	0	0	0	0	0	0	0	0	0	0	0	0	0	0	0	1	0	0
Mn	Sr	Mo	La2O3	70	0.566666667	0.283333333	0.15	2	10.81675632	1_HTS300	0	0	0	0	0	0	0	0	0	0	0	0	0	0	0	0	0	0	0	0	0	0	0	0	0	0	0	0	0	0	0	0	0	0	0	0	1	0	0
Fe	Cu	Zr	La2O3	85	0.566666667	0.283333333	0.15	2	4.852996	1_HTS300	0	0	0	0	0	0	0	0	0	0	0	0	0	0	0	0	0	0	0	0	1	0	0	0	0	0	1	0	0	0	0	0	0	0	0	0	1	0	0
Fe	Nd	Tb	La2O3	70	0.566666667	0.283333333	0.15	2	13.412299	1_HTS300	0	0	0	0	0	0	0	0	0	0	0	0	0	0	0	0	0	0	0	0	0	0	0	0	0	0	1	0	0	0	0	0	0	0	0	0	1	0	0
Ni	Hf	none	La2O3	75	0.4	0.2	0.4	2	0.823548562	1_HTS300	0	0	0	0	0	0	0	0	0	0	0	0	0	0	0	0	0	0	0	0	0	0	0	0	0	0	0	0	0	0	0	1	0	0	0	0	1	0	0
Cu	Mo	Pd	La2O3	90	0.257142857	0.042857143	0.7	6	0.471239353	1_HTS300	0	0	0	0	0	0	0	0	0	0	0	0	0	0	0	0	0	0	0	0	1	0	0	0	0	0	0	0	0	0	0	0	0	0	0	0	1	0	0
Cu	La	W	La2O3	85	0.566666667	0.283333333	0.15	2	8.155743	1_HTS300	0	0	0	0	0	0	0	0	0	0	0	0	0	0	0	0	0	0	0	0	1	0	0	0	0	0	0	0	0	0	0	0	0	0	0	1	1	0	0
Zn	Y	none	La2O3	75	0.566666667	0.283333333	0.15	2	15.070077	1_HTS300	0	0	0	0	0	0	0	0	0	0	0	0	0	0	0	0	0	0	0	0	0	0	0	0	0	0	0	0	0	0	0	0	0	0	0	0	1	0	0
Zn	Zr	Cs	La2O3	75	0.566666667	0.283333333	0.15	2	12.211521	1_HTS300	0	0	0	0	0	0	0	0	0	0	0	0	0	0	0	0	0	0	0	1	0	0	0	0	0	0	0	0	0	0	0	0	0	0	0	0	1	0	0
Sr	Y	Ce	La2O3	70	0.566666667	0.283333333	0.15	2	14.77693471	1_HTS300	0	0	0	0	0	0	0	0	0	0	0	0	0	0	0	1	0	0	0	0	0	0	0	0	0	0	0	0	0	0	0	0	0	0	0	0	1	0	0
Mo	Cs	Tb	La2O3	70	0.566666667	0.283333333	0.15	2	13.307038	1_HTS300	0	0	0	0	0	0	0	0	0	0	0	0	0	0	0	0	0	0	0	1	0	0	0	0	0	0	0	0	0	0	0	0	0	0	0	0	1	0	0
Ba	Ce	Hf	La2O3	75	0.566666667	0.283333333	0.15	2	13.948028	1_HTS300	0	0	0	0	0	0	1	0	0	0	0	0	0	0	0	1	0	0	0	0	0	0	0	0	0	0	0	0	0	0	0	1	0	0	0	0	1	0	0
La	Tb	none	La2O3	75	0.566666667	0.283333333	0.15	2	7.842780682	1_HTS300	0	0	0	0	0	0	0	0	0	0	0	0	0	0	0	0	0	0	0	0	0	0	0	0	0	0	0	0	0	0	0	0	0	0	0	1	1	0	0
Na	K	V	CeO2	85	0.566666667	0.283333333	0.15	2	6.647570788	1_HTS300	0	0	0	0	0	0	0	0	0	0	0	0	0	0	0	0	1	0	0	0	0	0	0	0	0	0	0	0	0	0	0	0	0	1	0	0	0	0	0
Mg	K	none	CeO2	80	0.566666667	0.283333333	0.15	2	8.507351	1_HTS300	0	0	0	0	0	0	0	0	0	0	0	0	0	0	0	0	1	0	0	0	0	0	0	0	0	0	0	0	0	0	0	0	0	1	0	0	0	0	0
Mg	Fe	none	CeO2	80	0.566666667	0.283333333	0.15	2	7.03468	1_HTS300	0	0	0	0	0	0	0	0	0	0	0	0	0	0	0	0	1	0	0	0	0	0	0	0	0	0	1	0	0	0	0	0	0	0	0	0	0	0	0
Mg	Ni	Zn	CeO2	80	0.728571429	0.121428572	0.15	6	1.309182	1_HTS300	0	0	0	0	0	0	0	0	0	0	0	0	0	0	0	0	1	0	0	0	0	0	0	0	0	0	0	0	0	0	0	0	0	0	0	0	0	0	0
K	Co	Sr	CeO2	90	0.4	0.2	0.4	2	6.403222	1_HTS300	0	0	0	0	0	0	0	0	0	0	0	0	0	0	0	0	1	1	0	0	0	0	0	0	0	0	0	0	0	0	0	0	0	1	0	0	0	0	0
K	La	Ce	CeO2	70	0.566666667	0.283333333	0.15	2	13.420735	1_HTS300	0	0	0	0	0	0	0	0	0	0	0	0	0	0	0	1	1	0	0	0	0	0	0	0	0	0	0	0	0	0	0	0	0	1	0	1	0	0	0
K	Ce	Eu	CeO2	90	0.4	0.2	0.4	2	5.084901	1_HTS300	0	0	0	0	0	0	0	0	0	0	0	0	0	0	0	1	1	0	0	0	0	0	0	0	1	0	0	0	0	0	0	0	0	1	0	0	0	0	0
Ti	Ni	Ba	CeO2	75	0.2	0.1	0.7	2	4.787673168	1_HTS300	0	0	0	0	0	0	1	0	0	0	0	0	0	0	0	0	1	0	0	0	0	0	0	0	0	0	0	0	0	0	0	0	0	0	0	0	0	0	0
Ti	Zn	Pd	CeO2	80	0.566666667	0.283333333	0.15	2	1.197316061	1_HTS300	0	0	0	0	0	0	0	0	0	0	0	0	0	0	0	0	1	0	0	0	0	0	0	0	0	0	0	0	0	0	0	0	0	0	0	0	0	0	0
V	Sr	W	CeO2	85	0.514285714	0.085714286	0.4	6	1.734474913	1_HTS300	0	0	0	0	0	0	0	0	0	0	0	0	0	0	0	0	1	0	0	0	0	0	0	0	0	0	0	0	0	0	0	0	0	0	0	0	0	0	0
V	Zr	Nd	CeO2	85	0.566666667	0.283333333	0.15	2	7.485939	1_HTS300	0	0	0	0	0	0	0	0	0	0	0	0	0	0	0	0	1	0	0	0	0	0	0	0	0	0	0	0	0	0	0	0	0	0	0	0	0	0	0
V	Pd	W	CeO2	80	0.2	0.1	0.7	2	1.572863	1_HTS300	0	0	0	0	0	0	0	0	0	0	0	0	0	0	0	0	1	0	0	0	0	0	0	0	0	0	0	0	0	0	0	0	0	0	0	0	0	0	0
Mn	Ni	Y	CeO2	90	0.4	0.2	0.4	2	2.910711	1_HTS300	0	0	0	0	0	0	0	0	0	0	0	0	0	0	0	0	1	0	0	0	0	0	0	0	0	0	0	0	0	0	0	0	0	0	0	0	0	0	0
Mn	Sr	La	CeO2	85	0.566666667	0.283333333	0.15	2	8.634161	1_HTS300	0	0	0	0	0	0	0	0	0	0	0	0	0	0	0	0	1	0	0	0	0	0	0	0	0	0	0	0	0	0	0	0	0	0	0	1	0	0	0
Mn	Y	Zr	CeO2	80	0.566666667	0.283333333	0.15	2	6.646888	1_HTS300	0	0	0	0	0	0	0	0	0	0	0	0	0	0	0	0	1	0	0	0	0	0	0	0	0	0	0	0	0	0	0	0	0	0	0	0	0	0	0
Mn	Ba	La	CeO2	85	0.566666667	0.283333333	0.15	2	8.647695	1_HTS300	0	0	0	0	0	0	1	0	0	0	0	0	0	0	0	0	1	0	0	0	0	0	0	0	0	0	0	0	0	0	0	0	0	0	0	1	0	0	0
Mn	none	none	CeO2	80	0.566666667	0.283333333	0.15	2	4.898105439	1_HTS300	0	0	0	0	0	0	0	0	0	0	0	0	0	0	0	0	1	0	0	0	0	0	0	0	0	0	0	0	0	0	0	0	0	0	0	0	0	0	0
Fe	Zn	La	CeO2	80	0.566666667	0.283333333	0.15	2	3.536593	1_HTS300	0	0	0	0	0	0	0	0	0	0	0	0	0	0	0	0	1	0	0	0	0	0	0	0	0	0	1	0	0	0	0	0	0	0	0	1	0	0	0
Fe	Y	La	CeO2	80	0.566666667	0.283333333	0.15	2	5.054916	1_HTS300	0	0	0	0	0	0	0	0	0	0	0	0	0	0	0	0	1	0	0	0	0	0	0	0	0	0	1	0	0	0	0	0	0	0	0	1	0	0	0
Ni	Sr	Nd	CeO2	80	0.4	0.2	0.4	2	10.249025	1_HTS300	0	0	0	0	0	0	0	0	0	0	0	0	0	0	0	0	1	0	0	0	0	0	0	0	0	0	0	0	0	0	0	0	0	0	0	0	0	0	0
Ni	Nd	Eu	CeO2	90	0.2	0.1	0.7	2	8.320305	1_HTS300	0	0	0	0	0	0	0	0	0	0	0	0	0	0	0	0	1	0	0	0	0	0	0	0	1	0	0	0	0	0	0	0	0	0	0	0	0	0	0
Zn	Pd	Ce	CeO2	80	0.566666667	0.283333333	0.15	2	2.184304	1_HTS300	0	0	0	0	0	0	0	0	0	0	0	0	0	0	0	1	1	0	0	0	0	0	0	0	0	0	0	0	0	0	0	0	0	0	0	0	0	0	0
Zn	La	Nd	CeO2	75	0.566666667	0.283333333	0.15	2	9.164069	1_HTS300	0	0	0	0	0	0	0	0	0	0	0	0	0	0	0	0	1	0	0	0	0	0	0	0	0	0	0	0	0	0	0	0	0	0	0	1	0	0	0
Sr	Cs	none	CeO2	80	0.4	0.2	0.4	2	12.540572	1_HTS300	0	0	0	0	0	0	0	0	0	0	0	0	0	0	0	0	1	0	0	1	0	0	0	0	0	0	0	0	0	0	0	0	0	0	0	0	0	0	0
Sr	Ce	none	CeO2	70	0.566666667	0.283333333	0.15	2	10.90652756	1_HTS300	0	0	0	0	0	0	0	0	0	0	0	0	0	0	0	1	1	0	0	0	0	0	0	0	0	0	0	0	0	0	0	0	0	0	0	0	0	0	0
Y	Zr	Eu	CeO2	85	0.566666667	0.283333333	0.15	2	7.182324	1_HTS300	0	0	0	0	0	0	0	0	0	0	0	0	0	0	0	0	1	0	0	0	0	0	0	0	1	0	0	0	0	0	0	0	0	0	0	0	0	0	0
Mo	Pd	Ba	CeO2	80	0.4	0.2	0.4	2	0.715220802	1_HTS300	0	0	0	0	0	0	1	0	0	0	0	0	0	0	0	0	1	0	0	0	0	0	0	0	0	0	0	0	0	0	0	0	0	0	0	0	0	0	0
Cs	Ce	Nd	CeO2	80	0.566666667	0.283333333	0.15	2	5.856872348	1_HTS300	0	0	0	0	0	0	0	0	0	0	0	0	0	0	0	1	1	0	0	1	0	0	0	0	0	0	0	0	0	0	0	0	0	0	0	0	0	0	0
Ba	La	W	Al2O3	80	0.4	0.2	0.4	2	3.513957	1_HTS300	0	0	1	0	0	0	1	0	0	0	0	0	0	0	0	0	0	0	0	0	0	0	0	0	0	0	0	0	0	0	0	0	0	0	0	1	0	0	0
Tb	Hf	W	La2O3	75	0.566666667	0.283333333	0.15	2	15.211479	1_HTS300	0	0	0	0	0	0	0	0	0	0	0	0	0	0	0	0	0	0	0	0	0	0	0	0	0	0	0	0	0	0	0	1	0	0	0	0	1	0	0
Ni	Ba	Hf	ZrO2	85	0.514285714	0.085714286	0.4	6	1.315615	1_HTS300	0	0	0	0	0	0	1	0	0	0	0	0	0	0	0	0	0	0	0	0	0	0	0	0	0	0	0	0	0	0	0	1	0	0	0	0	0	0	0
Li	La	W	ZrO2	85	0.2	0.1	0.7	2	13.616111	1_HTS300	0	0	0	0	0	0	0	0	0	0	0	0	0	0	0	0	0	0	0	0	0	0	0	0	0	0	0	0	0	0	0	0	0	0	0	1	0	1	0
K	Mn	Zn	ZrO2	75	0.566666667	0.283333333	0.15	2	6.207131	1_HTS300	0	0	0	0	0	0	0	0	0	0	0	0	0	0	0	0	0	0	0	0	0	0	0	0	0	0	0	0	0	0	0	0	0	1	0	0	0	0	0
Co	Ce	Nd	ZrO2	80	0.257142857	0.042857143	0.7	6	1.209233	1_HTS300	0	0	0	0	0	0	0	0	0	0	0	0	0	0	0	1	0	1	0	0	0	0	0	0	0	0	0	0	0	0	0	0	0	0	0	0	0	0	0
Li	Co	Y	ZrO2	75	0.566666667	0.283333333	0.15	2	2.206972	1_HTS300	0	0	0	0	0	0	0	0	0	0	0	0	0	0	0	0	0	1	0	0	0	0	0	0	0	0	0	0	0	0	0	0	0	0	0	0	0	1	0
La	Eu	W	ZrO2	85	0.4	0.2	0.4	2	4.810295	1_HTS300	0	0	0	0	0	0	0	0	0	0	0	0	0	0	0	0	0	0	0	0	0	0	0	0	1	0	0	0	0	0	0	0	0	0	0	1	0	0	0
Li	Hf	none	Al2O3	90	0.4	0.2	0.4	2	4.913097	1_HTS300	0	0	1	0	0	0	0	0	0	0	0	0	0	0	0	0	0	0	0	0	0	0	0	0	0	0	0	0	0	0	0	1	0	0	0	0	0	1	0
Mn	Eu	Hf	CeO2	80	0.566666667	0.283333333	0.15	2	6.205609	1_HTS300	0	0	0	0	0	0	0	0	0	0	0	0	0	0	0	0	1	0	0	0	0	0	0	0	1	0	0	0	0	0	0	1	0	0	0	0	0	0	0
Ca	W	none	BaO	80	0.4	0.2	0.4	2	6.20282	1_HTS300	0	0	0	0	0	0	0	1	0	0	0	0	1	0	0	0	0	0	0	0	0	0	0	0	0	0	0	0	0	0	0	0	0	0	0	0	0	0	0
Mn	Fe	Nd	ZrO2	85	0.4	0.2	0.4	2	4.713005	1_HTS300	0	0	0	0	0	0	0	0	0	0	0	0	0	0	0	0	0	0	0	0	0	0	0	0	0	0	1	0	0	0	0	0	0	0	0	0	0	0	0
Na	V	Mo	ZrO2	80	0.566666667	0.283333333	0.15	2	8.217481	1_HTS300	0	0	0	0	0	0	0	0	0	0	0	0	0	0	0	0	0	0	0	0	0	0	0	0	0	0	0	0	0	0	0	0	0	0	0	0	0	0	0
K	Mn	Ce	ZrO2	80	0.566666667	0.283333333	0.15	2	6.608805	1_HTS300	0	0	0	0	0	0	0	0	0	0	0	0	0	0	0	1	0	0	0	0	0	0	0	0	0	0	0	0	0	0	0	0	0	1	0	0	0	0	0
Ni	Y	Eu	ZrO2	80	0.257142857	0.042857143	0.7	6	1.013521	1_HTS300	0	0	0	0	0	0	0	0	0	0	0	0	0	0	0	0	0	0	0	0	0	0	0	0	1	0	0	0	0	0	0	0	0	0	0	0	0	0	0
Sr	Ba	Hf	BaO	85	0.2	0.1	0.7	2	10.612461	1_HTS300	0	0	0	0	0	0	1	1	0	0	0	0	0	0	0	0	0	0	0	0	0	0	0	0	0	0	0	0	0	0	0	1	0	0	0	0	0	0	0
Na	K	none	ZrO2	75	0.566666667	0.283333333	0.15	2	6.411834	1_HTS300	0	0	0	0	0	0	0	0	0	0	0	0	0	0	0	0	0	0	0	0	0	0	0	0	0	0	0	0	0	0	0	0	0	1	0	0	0	0	0
Sr	Pd	W	CaO	90	0.257142857	0.042857143	0.7	6	1.009589	1_HTS300	0	0	0	0	0	0	0	0	0	0	0	0	0	1	0	0	0	0	0	0	0	0	0	0	0	0	0	0	0	0	0	0	0	0	0	0	0	0	0
Ca	Cu	Hf	ZrO2	80	0.566666667	0.283333333	0.15	2	1.915152	1_HTS300	0	0	0	0	0	0	0	0	0	0	0	0	1	0	0	0	0	0	0	0	1	0	0	0	0	0	0	0	0	0	0	1	0	0	0	0	0	0	0
Na	Eu	Hf	MgO	75	0.566666667	0.283333333	0.15	2	16.61011	1_HTS300	0	0	0	0	0	0	0	0	0	0	0	0	0	0	0	0	0	0	0	0	0	0	0	0	1	0	0	0	0	0	0	1	0	0	0	0	0	0	0
Pd	Ce	Tb	La2O3	90	0.257142857	0.042857143	0.7	6	1.111173	1_HTS300	0	0	0	0	0	0	0	0	0	0	0	0	0	0	0	1	0	0	0	0	0	0	0	0	0	0	0	0	0	0	0	0	0	0	0	0	1	0	0
Na	Pd	W	La2O3	90	0.24	0.06	0.7	4	1.306809	1_HTS300	0	0	0	0	0	0	0	0	0	0	0	0	0	0	0	0	0	0	0	0	0	0	0	0	0	0	0	0	0	0	0	0	0	0	0	0	1	0	0
Ti	Y	Ce	TiO2	80	0.566666667	0.283333333	0.15	2	1.312776	1_HTS300	0	0	0	0	0	0	0	0	0	0	0	0	0	0	0	1	0	0	0	0	0	0	0	0	0	0	0	0	0	0	0	0	0	0	0	0	0	0	0
Na	Ce	Tb	SiO2	85	0.4	0.2	0.4	2	8.916006	1_HTS300	0	0	0	0	0	0	0	0	0	0	0	0	0	0	0	1	0	0	0	0	0	0	0	0	0	0	0	0	0	0	0	0	0	0	0	0	0	0	0
Ni	Mo	Eu	TiO2	85	0.2	0.1	0.7	2	4.20364	1_HTS300	0	0	0	0	0	0	0	0	0	0	0	0	0	0	0	0	0	0	0	0	0	0	0	0	1	0	0	0	0	0	0	0	0	0	0	0	0	0	0
Li	Tb	none	ZrO2	90	0.566666667	0.283333333	0.15	2	6.011748	1_HTS300	0	0	0	0	0	0	0	0	0	0	0	0	0	0	0	0	0	0	0	0	0	0	0	0	0	0	0	0	0	0	0	0	0	0	0	0	0	1	0
Mn	Y	Hf	BaO	90	0.68	0.17	0.15	4	6.10898	1_HTS300	0	0	0	0	0	0	0	1	0	0	0	0	0	0	0	0	0	0	0	0	0	0	0	0	0	0	0	0	0	0	0	1	0	0	0	0	0	0	0
Ca	Ti	Cu	SiO2	90	0.2	0.1	0.7	2	9.70987	1_HTS300	0	0	0	0	0	0	0	0	0	0	0	0	1	0	0	0	0	0	0	0	1	0	0	0	0	0	0	0	0	0	0	0	0	0	0	0	0	0	0
La	Ce	W	TiO2	85	0.566666667	0.283333333	0.15	2	12.515516	1_HTS300	0	0	0	0	0	0	0	0	0	0	0	0	0	0	0	1	0	0	0	0	0	0	0	0	0	0	0	0	0	0	0	0	0	0	0	1	0	0	0
Mg	Ni	W	BaO	85	0.2	0.1	0.7	2	9.613988	1_HTS300	0	0	0	0	0	0	0	1	0	0	0	0	0	0	0	0	0	0	0	0	0	0	0	0	0	0	0	0	0	0	0	0	0	0	0	0	0	0	0
Ce	Nd	Tb	TiO2	80	0.4	0.2	0.4	2	10.80872	1_HTS300	0	0	0	0	0	0	0	0	0	0	0	0	0	0	0	1	0	0	0	0	0	0	0	0	0	0	0	0	0	0	0	0	0	0	0	0	0	0	0
K	Zr	Tb	SiO2	90	0.68	0.17	0.15	4	7.715794	1_HTS300	0	0	0	0	0	0	0	0	0	0	0	0	0	0	0	0	0	0	0	0	0	0	0	0	0	0	0	0	0	0	0	0	0	1	0	0	0	0	0
Zn	Tb	Hf	TiO2	85	0.2	0.1	0.7	2	11.004799	1_HTS300	0	0	0	0	0	0	0	0	0	0	0	0	0	0	0	0	0	0	0	0	0	0	0	0	0	0	0	0	0	0	0	1	0	0	0	0	0	0	0
Mg	Ti	La	TiO2	85	0.2	0.1	0.7	2	12.01029	1_HTS300	0	0	0	0	0	0	0	0	0	0	0	0	0	0	0	0	0	0	0	0	0	0	0	0	0	0	0	0	0	0	0	0	0	0	0	1	0	0	0
Na	V	Y	CeO2	85	0.566666667	0.283333333	0.15	2	7.311141	1_HTS300	0	0	0	0	0	0	0	0	0	0	0	0	0	0	0	0	1	0	0	0	0	0	0	0	0	0	0	0	0	0	0	0	0	0	0	0	0	0	0
Mg	Zn	Eu	SiO2	85	0.566666667	0.283333333	0.15	2	7.614427	1_HTS300	0	0	0	0	0	0	0	0	0	0	0	0	0	0	0	0	0	0	0	0	0	0	0	0	1	0	0	0	0	0	0	0	0	0	0	0	0	0	0
Ti	V	Ba	MgO	90	0.2	0.1	0.7	2	8.219163	1_HTS300	0	0	0	0	0	0	1	0	0	0	0	0	0	0	0	0	0	0	0	0	0	0	0	0	0	0	0	0	0	0	0	0	0	0	0	0	0	0	0
Ni	Ce	Nd	SiO2	85	0.2	0.1	0.7	2	8.306126	1_HTS300	0	0	0	0	0	0	0	0	0	0	0	0	0	0	0	1	0	0	0	0	0	0	0	0	0	0	0	0	0	0	0	0	0	0	0	0	0	0	0
Ti	Ni	Hf	La2O3	90	0.2	0.1	0.7	2	9.615648	1_HTS300	0	0	0	0	0	0	0	0	0	0	0	0	0	0	0	0	0	0	0	0	0	0	0	0	0	0	0	0	0	0	0	1	0	0	0	0	1	0	0
Co	Sr	Ba	ZrO2	90	0.257142857	0.042857143	0.7	6	4.882481	1_HTS300	0	0	0	0	0	0	1	0	0	0	0	0	0	0	0	0	0	1	0	0	0	0	0	0	0	0	0	0	0	0	0	0	0	0	0	0	0	0	0
Fe	La	Hf	MgO	85	0.566666667	0.283333333	0.15	2	6.502292	1_HTS300	0	0	0	0	0	0	0	0	0	0	0	0	0	0	0	0	0	0	0	0	0	0	0	0	0	0	1	0	0	0	0	1	0	0	0	1	0	0	0
Li	Ni	Hf	SiO2	85	0.4	0.2	0.4	2	11.175053	1_HTS300	0	0	0	0	0	0	0	0	0	0	0	0	0	0	0	0	0	0	0	0	0	0	0	0	0	0	0	0	0	0	0	1	0	0	0	0	0	1	0
Li	K	Mn	ZrO2	75	0.566666667	0.283333333	0.15	2	10.698479	1_HTS300	0	0	0	0	0	0	0	0	0	0	0	0	0	0	0	0	0	0	0	0	0	0	0	0	0	0	0	0	0	0	0	0	0	1	0	0	0	1	0
none	none	none	Al2O3	75	0.153333333	3.695652174	0.505882353	2	7.37	2_HTS59	0	0	1	0	0	0	0	0	0	0	0	0	0	0	0	0	0	0	0	0	0	0	0	0	0	0	0	0	0	0	0	0	0	0	0	0	0	0	0
none	none	none	BEA	77.5	0.15	3.766666667	0.504424779	2	7.31	2_HTS59	0	0	0	0	1	0	0	0	0	0	0	0	0	0	0	0	0	0	0	0	0	0	0	0	0	0	0	0	0	0	0	0	0	0	0	0	0	0	0
none	none	none	BN	75	0.153333333	3.695652174	0.505882353	2	8.92	2_HTS59	0	0	0	0	0	1	0	0	0	0	0	0	0	0	0	0	0	0	0	0	0	0	0	0	0	0	0	0	0	0	0	0	0	0	0	0	0	0	0
Ce	Na	W	SiO2	80	0.7	0.285714286	0.5	2	16.75	2_HTS59	0	0	0	0	0	0	0	0	0	0	0	0	0	0	0	1	0	0	0	0	0	0	0	0	0	0	0	0	0	0	0	0	0	0	0	0	0	0	0
none	none	none	CeO2	77.5	0.15	4.266666667	0.3359375	3	8.84	2_HTS59	0	0	0	0	0	0	0	0	0	0	0	0	0	0	0	0	1	0	0	0	0	0	0	0	0	0	0	0	0	0	0	0	0	0	0	0	0	0	0
Co	Na	W	SiO2	85	0.7	0.321428571	0.333333333	3	16.14	2_HTS59	0	0	0	0	0	0	0	0	0	0	0	0	0	0	0	0	0	1	0	0	0	0	0	0	0	0	0	0	0	0	0	0	0	0	0	0	0	0	0
Cu	Na	W	SiO2	80	0.4	1	0.5	2	9.11	2_HTS59	0	0	0	0	0	0	0	0	0	0	0	0	0	0	0	0	0	0	0	0	1	0	0	0	0	0	0	0	0	0	0	0	0	0	0	0	0	0	0
Eu	Na	W	SiO2	85	0.7	0.285714286	0.5	2	16.09	2_HTS59	0	0	0	0	0	0	0	0	0	0	0	0	0	0	0	0	0	0	0	0	0	0	0	0	1	0	0	0	0	0	0	0	0	0	0	0	0	0	0
Fe	Na	W	SiO2	80	0.7	0.285714286	0.5	2	15.24	2_HTS59	0	0	0	0	0	0	0	0	0	0	0	0	0	0	0	0	0	0	0	0	0	0	0	0	0	0	1	0	0	0	0	0	0	0	0	0	0	0	0
Hf	Na	W	SiO2	85	0.7	0.285714286	0.5	2	16.01	2_HTS59	0	0	0	0	0	0	0	0	0	0	0	0	0	0	0	0	0	0	0	0	0	0	0	0	0	0	0	0	0	0	0	1	0	0	0	0	0	0	0
La	Na	W	SiO2	85	0.7	0.321428571	0.333333333	3	15.43	2_HTS59	0	0	0	0	0	0	0	0	0	0	0	0	0	0	0	0	0	0	0	0	0	0	0	0	0	0	0	0	0	0	0	0	0	0	0	1	0	0	0
none	none	none	MgO	75	0.4	1	0.5	2	7.47	2_HTS59	0	0	0	0	0	0	0	0	0	0	0	0	0	0	0	0	0	0	0	0	0	0	0	0	0	0	0	0	0	0	0	0	0	0	0	0	0	0	0
Mn	Ba	W	SiO2	85	0.7	0.364285714	0.176470588	6	10.17	2_HTS59	0	0	0	0	0	0	1	0	0	0	0	0	0	0	0	0	0	0	0	0	0	0	0	0	0	0	0	0	0	0	0	0	0	0	0	0	0	0	0
Mn	Ca	W	SiO2	85	0.7	0.342857143	0.25	4	8.51	2_HTS59	0	0	0	0	0	0	0	0	0	0	0	0	1	0	0	0	0	0	0	0	0	0	0	0	0	0	0	0	0	0	0	0	0	0	0	0	0	0	0
Mn	Fe	Mo	SiO2	85	0.7	0.364285714	0.176470588	6	12.57	2_HTS59	0	0	0	0	0	0	0	0	0	0	0	0	0	0	0	0	0	0	0	0	0	0	0	0	0	0	1	0	0	0	0	0	0	0	0	0	0	0	0
Mn	K	Mo	SiO2	80	0.7	0.321428571	0.333333333	3	16.6	2_HTS59	0	0	0	0	0	0	0	0	0	0	0	0	0	0	0	0	0	0	0	0	0	0	0	0	0	0	0	0	0	0	0	0	0	1	0	0	0	0	0
Mn	K	W	SiO2	77.5	0.7	0.285714286	0.5	2	18.55	2_HTS59	0	0	0	0	0	0	0	0	0	0	0	0	0	0	0	0	0	0	0	0	0	0	0	0	0	0	0	0	0	0	0	0	0	1	0	0	0	0	0
Mn	Li	Mo	SiO2	80	0.7	0.285714286	0.5	2	14	2_HTS59	0	0	0	0	0	0	0	0	0	0	0	0	0	0	0	0	0	0	0	0	0	0	0	0	0	0	0	0	0	0	0	0	0	0	0	0	0	1	0
Mn	Li	W	SiO2	80	0.7	0.285714286	0.5	2	18.81	2_HTS59	0	0	0	0	0	0	0	0	0	0	0	0	0	0	0	0	0	0	0	0	0	0	0	0	0	0	0	0	0	0	0	0	0	0	0	0	0	1	0
Mn	Mg	W	SiO2	77.5	0.7	0.285714286	0.5	2	16.08	2_HTS59	0	0	0	0	0	0	0	0	0	0	0	0	0	0	0	0	0	0	0	0	0	0	0	0	0	0	0	0	0	0	0	0	0	0	0	0	0	0	0
Mn	none	Mo	SiO2	85	0.15	4.266666667	0.3359375	3	6.92	2_HTS59	0	0	0	0	0	0	0	0	0	0	0	0	0	0	0	0	0	0	0	0	0	0	0	0	0	0	0	0	0	0	0	0	0	0	0	0	0	0	0
Mn	Na	none	SiO2	85	0.7	0.285714286	0.5	2	9.66	2_HTS59	0	0	0	0	0	0	0	0	0	0	0	0	0	0	0	0	0	0	0	0	0	0	0	0	0	0	0	0	0	0	0	0	0	0	0	0	0	0	0
Mn	Na	Mo	SiO2	77.5	0.7	0.285714286	0.5	2	15.43	2_HTS59	0	0	0	0	0	0	0	0	0	0	0	0	0	0	0	0	0	0	0	0	0	0	0	0	0	0	0	0	0	0	0	0	0	0	0	0	0	0	0
Mn	Na	W	Al2O3	75	0.15	4.266666667	0.3359375	3	8.08	2_HTS59	0	0	1	0	0	0	0	0	0	0	0	0	0	0	0	0	0	0	0	0	0	0	0	0	0	0	0	0	0	0	0	0	0	0	0	0	0	0	0
Mn	Na	W	BEA	80	0.7	0.321428571	0.333333333	3	15.56	2_HTS59	0	0	0	0	1	0	0	0	0	0	0	0	0	0	0	0	0	0	0	0	0	0	0	0	0	0	0	0	0	0	0	0	0	0	0	0	0	0	0
Mn	Na	W	BN	80	0.153333333	4.173913044	0.333333333	3	7.75	2_HTS59	0	0	0	0	0	1	0	0	0	0	0	0	0	0	0	0	0	0	0	0	0	0	0	0	0	0	0	0	0	0	0	0	0	0	0	0	0	0	0
Mn	Na	W	CeO2	77.5	0.7	0.285714286	0.5	2	18.04	2_HTS59	0	0	0	0	0	0	0	0	0	0	0	0	0	0	0	0	1	0	0	0	0	0	0	0	0	0	0	0	0	0	0	0	0	0	0	0	0	0	0
Mn	Na	W	MgO	80	0.7	0.323809524	0.323529412	3	9.32	2_HTS59	0	0	0	0	0	0	0	0	0	0	0	0	0	0	0	0	0	0	0	0	0	0	0	0	0	0	0	0	0	0	0	0	0	0	0	0	0	0	0
Mn	Na	W	Nb2O5	80	0.15	4.266666667	0.3359375	3	8.25	2_HTS59	0	0	0	0	0	0	0	0	0	0	0	0	0	0	0	0	0	0	0	0	0	0	0	0	0	0	0	0	0	0	0	0	0	0	0	0	0	0	0
Mn	Na	W	SiC	80	0.7	0.323809524	0.323529412	3	19.59	2_HTS59	0	0	0	0	0	0	0	0	0	0	0	0	0	0	0	0	0	0	0	0	0	0	0	0	0	0	0	0	0	0	0	0	0	0	0	0	0	0	0
Mn	Na	W	SiCnf	80	0.7	0.285714286	0.5	2	19.15	2_HTS59	0	0	0	0	0	0	0	0	0	0	0	0	0	0	0	0	0	0	0	0	0	0	0	0	0	0	0	0	0	0	0	0	0	0	0	0	0	0	0
Mn	Na	W	SiO2	80	0.7	0.285714286	0.5	2	21.03	2_HTS59	0	0	0	0	0	0	0	0	0	0	0	0	0	0	0	0	0	0	0	0	0	0	0	0	0	0	0	0	0	0	0	0	0	0	0	0	0	0	0
Mn	Na	W	TiO2	75	0.7	0.285714286	0.5	2	18.29	2_HTS59	0	0	0	0	0	0	0	0	0	0	0	0	0	0	0	0	0	0	0	0	0	0	0	0	0	0	0	0	0	0	0	0	0	0	0	0	0	0	0
Mn	Na	W	ZSM-5	80	0.7	0.321428571	0.333333333	3	19.9	2_HTS59	0	0	0	0	0	0	0	0	0	0	0	0	0	0	0	0	0	0	0	0	0	0	0	0	0	0	0	0	0	0	0	0	0	0	0	0	0	0	0
Mn	Na	W	ZrO2	80	0.7	0.342857143	0.25	4	11.21	2_HTS59	0	0	0	0	0	0	0	0	0	0	0	0	0	0	0	0	0	0	0	0	0	0	0	0	0	0	0	0	0	0	0	0	0	0	0	0	0	0	0
Mn	Sr	W	SiO2	85	0.7	0.342857143	0.25	4	10.65	2_HTS59	0	0	0	0	0	0	0	0	0	0	0	0	0	0	0	0	0	0	0	0	0	0	0	0	0	0	0	0	0	0	0	0	0	0	0	0	0	0	0
Mn	none	W	SiO2	85	0.7	0.371428571	0.153846154	6	9.94	2_HTS59	0	0	0	0	0	0	0	0	0	0	0	0	0	0	0	0	0	0	0	0	0	0	0	0	0	0	0	0	0	0	0	0	0	0	0	0	0	0	0
Mn	Zn	Mo	SiO2	85	0.7	0.371428571	0.153846154	6	12.96	2_HTS59	0	0	0	0	0	0	0	0	0	0	0	0	0	0	0	0	0	0	0	0	0	0	0	0	0	0	0	0	0	0	0	0	0	0	0	0	0	0	0
Mo	Na	W	SiO2	80	0.7	0.285714286	0.5	2	11.01	2_HTS59	0	0	0	0	0	0	0	0	0	0	0	0	0	0	0	0	0	0	0	0	0	0	0	0	0	0	0	0	0	0	0	0	0	0	0	0	0	0	0
none	Na	none	SiO2	75	0.153333333	3.695652174	0.505882353	2	8.23	2_HTS59	0	0	0	0	0	0	0	0	0	0	0	0	0	0	0	0	0	0	0	0	0	0	0	0	0	0	0	0	0	0	0	0	0	0	0	0	0	0	0
none	Na	W	SiO2	80	0.7	0.285714286	0.5	2	18.71	2_HTS59	0	0	0	0	0	0	0	0	0	0	0	0	0	0	0	0	0	0	0	0	0	0	0	0	0	0	0	0	0	0	0	0	0	0	0	0	0	0	0
none	none	none	Nb2O5	70	0.4	1	0.5	2	7.65	2_HTS59	0	0	0	0	0	0	0	0	0	0	0	0	0	0	0	0	0	0	0	0	0	0	0	0	0	0	0	0	0	0	0	0	0	0	0	0	0	0	0
Nd	Na	W	SiO2	85	0.7	0.321428571	0.333333333	3	15.88	2_HTS59	0	0	0	0	0	0	0	0	0	0	0	0	0	0	0	0	0	0	0	0	0	0	0	0	0	0	0	0	0	0	0	0	0	0	0	0	0	0	0
Ni	Na	W	SiO2	80	0.7	0.285714286	0.5	2	17.66	2_HTS59	0	0	0	0	0	0	0	0	0	0	0	0	0	0	0	0	0	0	0	0	0	0	0	0	0	0	0	0	0	0	0	0	0	0	0	0	0	0	0
Pd	Na	W	SiO2	80	0.7	0.285714286	0.5	2	15.45	2_HTS59	0	0	0	0	0	0	0	0	0	0	0	0	0	0	0	0	0	0	0	0	0	0	0	0	0	0	0	0	0	0	0	0	0	0	0	0	0	0	0
none	none	none	SiC	77.5	0.15	3.766666667	0.504424779	2	8.57	2_HTS59	0	0	0	0	0	0	0	0	0	0	0	0	0	0	0	0	0	0	0	0	0	0	0	0	0	0	0	0	0	0	0	0	0	0	0	0	0	0	0
none	none	none	SiCnf	90	0.15	4.866666667	0.164383562	6	6.2	2_HTS59	0	0	0	0	0	0	0	0	0	0	0	0	0	0	0	0	0	0	0	0	0	0	0	0	0	0	0	0	0	0	0	0	0	0	0	0	0	0	0
none	none	none	SiO2	75	0.15	4.266666667	0.3359375	3	8.06	2_HTS59	0	0	0	0	0	0	0	0	0	0	0	0	0	0	0	0	0	0	0	0	0	0	0	0	0	0	0	0	0	0	0	0	0	0	0	0	0	0	0
Tb	Na	W	SiO2	85	0.7	0.321428571	0.333333333	3	15.84	2_HTS59	0	0	0	0	0	0	0	0	0	0	0	0	0	0	0	0	0	0	0	0	0	0	0	0	0	0	0	0	0	0	0	0	0	0	0	0	0	0	0
Ti	Na	W	SiO2	80	0.7	0.285714286	0.5	2	20.23	2_HTS59	0	0	0	0	0	0	0	0	0	0	0	0	0	0	0	0	0	0	0	0	0	0	0	0	0	0	0	0	0	0	0	0	0	0	0	0	0	0	0
none	none	none	TiO2	85	0.15	4.266666667	0.3359375	3	7.63	2_HTS59	0	0	0	0	0	0	0	0	0	0	0	0	0	0	0	0	0	0	0	0	0	0	0	0	0	0	0	0	0	0	0	0	0	0	0	0	0	0	0
V	Na	W	SiO2	77.5	0.4	1	0.5	2	8.58	2_HTS59	0	0	0	0	0	0	0	0	0	0	0	0	0	0	0	0	0	0	0	0	0	0	0	0	0	0	0	0	0	0	0	0	0	0	0	0	0	0	0
none	none	W	SiO2	77.5	0.4	1	0.5	2	7.2	2_HTS59	0	0	0	0	0	0	0	0	0	0	0	0	0	0	0	0	0	0	0	0	0	0	0	0	0	0	0	0	0	0	0	0	0	0	0	0	0	0	0
Y	Na	W	SiO2	85	0.7	0.323809524	0.323529412	3	12.56	2_HTS59	0	0	0	0	0	0	0	0	0	0	0	0	0	0	0	0	0	0	0	0	0	0	0	0	0	0	0	0	0	0	0	0	0	0	0	0	0	0	0
none	none	none	ZSM-5	75	0.4	1	0.5	2	7.88	2_HTS59	0	0	0	0	0	0	0	0	0	0	0	0	0	0	0	0	0	0	0	0	0	0	0	0	0	0	0	0	0	0	0	0	0	0	0	0	0	0	0
Zn	Na	W	SiO2	85	0.7	0.285714286	0.5	2	12.62	2_HTS59	0	0	0	0	0	0	0	0	0	0	0	0	0	0	0	0	0	0	0	0	0	0	0	0	0	0	0	0	0	0	0	0	0	0	0	0	0	0	0
Zr	Na	W	SiO2	80	0.7	0.285714286	0.5	2	13.86	2_HTS59	0	0	0	0	0	0	0	0	0	0	0	0	0	0	0	0	0	0	0	0	0	0	0	0	0	0	0	0	0	0	0	0	0	0	0	0	0	0	0
none	none	none	ZrO2	75	0.15	3.766666667	0.504424779	2	8.07	2_HTS59	0	0	0	0	0	0	0	0	0	0	0	0	0	0	0	0	0	0	0	0	0	0	0	0	0	0	0	0	0	0	0	0	0	0	0	0	0	0	0
Mn	none	none	Al2O3	79.985	0.4	0.08	0.5	4.8	5	3_Literature	0	0	1	0	0	0	0	0	0	0	0	0	0	0	0	0	0	0	0	0	0	0	0	0	0	0	0	0	0	0	0	0	0	0	0	0	0	0	0
Cd	none	none	Al2O3	79.985	0.4	0.08	0.5	4.8	4	3_Literature	0	0	1	0	0	0	0	0	0	0	0	0	0	0	1	0	0	0	0	0	0	0	0	0	0	0	0	0	0	0	0	0	0	0	0	0	0	0	0
Sn	none	none	Al2O3	79.985	0.4	0.08	0.5	4.8	0.4	3_Literature	0	0	1	0	0	0	0	0	0	0	0	0	0	0	0	0	0	0	0	0	0	0	0	0	0	0	0	0	0	0	0	0	0	0	0	0	0	0	0
Ti	none	none	Al2O3	79.985	0.4	0.08	0.5	4.8	3	3_Literature	0	0	1	0	0	0	0	0	0	0	0	0	0	0	0	0	0	0	0	0	0	0	0	0	0	0	0	0	0	0	0	0	0	0	0	0	0	0	0
Pt	none	none	Al2O3	79.985	0.4	0.08	0.5	4.8	0.1	3_Literature	0	0	1	0	0	0	0	0	0	0	0	0	0	0	0	0	0	0	0	0	0	0	0	0	0	0	0	0	0	0	0	0	0	0	0	0	0	0	0
Ce	none	none	Al2O3	79.985	0.4	0.08	0.5	4.8	0.1	3_Literature	0	0	1	0	0	0	0	0	0	0	0	0	0	0	0	1	0	0	0	0	0	0	0	0	0	0	0	0	0	0	0	0	0	0	0	0	0	0	0
Pb	none	none	Al2O3	79.985	0.4	0.08	0.5	4.8	2	3_Literature	0	0	1	0	0	0	0	0	0	0	0	0	0	0	0	0	0	0	0	0	0	0	0	0	0	0	0	0	0	0	0	0	0	0	0	0	0	0	0
Bi	none	none	Al2O3	79.985	0.4	0.08	0.5	4.8	0.4	3_Literature	0	0	1	0	0	0	0	0	0	0	1	0	0	0	0	0	0	0	0	0	0	0	0	0	0	0	0	0	0	0	0	0	0	0	0	0	0	0	0
Mo	none	none	Al2O3	79.985	0.4	0.08	0.5	4.8	0.1	3_Literature	0	0	1	0	0	0	0	0	0	0	0	0	0	0	0	0	0	0	0	0	0	0	0	0	0	0	0	0	0	0	0	0	0	0	0	0	0	0	0
Cu	none	none	Al2O3	79.985	0.4	0.08	0.5	4.8	0	3_Literature	0	0	1	0	0	0	0	0	0	0	0	0	0	0	0	0	0	0	0	0	1	0	0	0	0	0	0	0	0	0	0	0	0	0	0	0	0	0	0
Sb	none	none	Al2O3	79.985	0.4	0.08	0.5	4.8	1.5	3_Literature	0	0	1	0	0	0	0	0	0	0	0	0	0	0	0	0	0	0	0	0	0	0	0	0	0	0	0	0	0	0	0	0	0	0	0	0	0	0	0
Li	none	none	Al2O3	79.985	0.4	0.08	0.5	4.8	0.2	3_Literature	0	0	1	0	0	0	0	0	0	0	0	0	0	0	0	0	0	0	0	0	0	0	0	0	0	0	0	0	0	0	0	0	0	0	0	0	0	1	0
Mg	none	none	Al2O3	79.985	0.4	0.08	0.5	4.8	0.8	3_Literature	0	0	1	0	0	0	0	0	0	0	0	0	0	0	0	0	0	0	0	0	0	0	0	0	0	0	0	0	0	0	0	0	0	0	0	0	0	0	0
Pb	none	none	Al2O3	69.985	0.26	0.05	0.7	5	3.5	3_Literature	0	0	1	0	0	0	0	0	0	0	0	0	0	0	0	0	0	0	0	0	0	0	0	0	0	0	0	0	0	0	0	0	0	0	0	0	0	0	0
Pb	none	none	Bi2O3	69.985	0.25	0.04	0.7	6.1	3.7	3_Literature	0	0	0	0	0	0	0	0	0	0	0	1	0	0	0	0	0	0	0	0	0	0	0	0	0	0	0	0	0	0	0	0	0	0	0	0	0	0	0
Pb	Bi	none	Sb2O3	69.985	0.47	0.03	0.5	14.2	5.4	3_Literature	0	0	0	0	0	0	0	0	0	0	1	0	0	0	0	0	0	0	0	0	0	0	0	0	0	0	0	0	0	0	0	0	0	0	0	0	0	0	0
Pb	none	none	Al2O3	74.985	0.51	0.05	0.5	9.8	3.7	3_Literature	0	0	1	0	0	0	0	0	0	0	0	0	0	0	0	0	0	0	0	0	0	0	0	0	0	0	0	0	0	0	0	0	0	0	0	0	0	0	0
Pb	none	none	Al2O3	74.985	0.5	0.05	0.5	10	6.3	3_Literature	0	0	1	0	0	0	0	0	0	0	0	0	0	0	0	0	0	0	0	0	0	0	0	0	0	0	0	0	0	0	0	0	0	0	0	0	0	0	0
Li	none	none	MgO	71.985	0.08	0.04	0.9	2	19	3_Literature	0	0	0	0	0	0	0	0	0	0	0	0	0	0	0	0	0	0	0	0	0	0	0	0	0	0	0	0	0	0	0	0	0	0	0	0	0	1	0
Na	none	none	CaO	74.785	0.64	0.08	0.3	8	10.1	3_Literature	0	0	0	0	0	0	0	0	0	0	0	0	0	1	0	0	0	0	0	0	0	0	0	0	0	0	0	0	0	0	0	0	0	0	0	0	0	0	0
Na	none	none	CaO	74.985	0.65	0.08	0.3	8.1	10.4	3_Literature	0	0	0	0	0	0	0	0	0	0	0	0	0	1	0	0	0	0	0	0	0	0	0	0	0	0	0	0	0	0	0	0	0	0	0	0	0	0	0
Pb	none	Si	CaO	73.985	0.66	0.08	0.3	8.3	4.1	3_Literature	0	0	0	0	0	0	0	0	0	0	0	0	0	1	0	0	0	0	0	0	0	0	0	0	0	0	0	0	0	0	0	0	0	0	0	0	0	0	0
Li	none	none	CaO	74.385	0.64	0.08	0.3	8	8.1	3_Literature	0	0	0	0	0	0	0	0	0	0	0	0	0	1	0	0	0	0	0	0	0	0	0	0	0	0	0	0	0	0	0	0	0	0	0	0	0	1	0
none	Ca	none	K2O	74.285	0.64	0.08	0.3	8	5.4	3_Literature	0	0	0	0	0	0	0	0	0	0	0	0	1	0	0	0	0	0	0	0	0	0	0	0	0	0	0	0	0	0	0	0	0	0	1	0	0	0	0
Li	none	none	CaO	75.385	0.67	0.07	0.3	9.6	9	3_Literature	0	0	0	0	0	0	0	0	0	0	0	0	0	1	0	0	0	0	0	0	0	0	0	0	0	0	0	0	0	0	0	0	0	0	0	0	0	1	0
K	none	none	CaO	78.285	0.66	0.08	0.3	8.3	6.1	3_Literature	0	0	0	0	0	0	0	0	0	0	0	0	0	1	0	0	0	0	0	0	0	0	0	0	0	0	0	0	0	0	0	0	0	1	0	0	0	0	0
Na	none	none	CaO	75.285	0.64	0.08	0.3	8	5.2	3_Literature	0	0	0	0	0	0	0	0	0	0	0	0	0	1	0	0	0	0	0	0	0	0	0	0	0	0	0	0	0	0	0	0	0	0	0	0	0	0	0
Li	none	none	Al2O3	75.085	0.65	0.08	0.3	8.1	5.5	3_Literature	0	0	1	0	0	0	0	0	0	0	0	0	0	0	0	0	0	0	0	0	0	0	0	0	0	0	0	0	0	0	0	0	0	0	0	0	0	1	0
none	none	none	BeO	74.385	0.65	0.08	0.3	8.3	2.2	3_Literature	0	0	0	0	0	0	0	0	0	1	0	0	0	0	0	0	0	0	0	0	0	0	0	0	0	0	0	0	0	0	0	0	0	0	0	0	0	0	0
none	none	none	MgO	75.285	0.64	0.08	0.3	8.2	2.2	3_Literature	0	0	0	0	0	0	0	0	0	0	0	0	0	0	0	0	0	0	0	0	0	0	0	0	0	0	0	0	0	0	0	0	0	0	0	0	0	0	0
none	none	none	SrO	74.585	0.77	0.05	0.2	15.4	6.5	3_Literature	0	0	0	0	0	0	0	0	0	0	0	0	0	0	0	0	0	0	0	0	0	0	0	0	0	0	0	0	0	0	0	0	0	0	0	0	0	0	0
none	none	none	MgO	60.685	0.64	0.08	0.3	8	0.2	3_Literature	0	0	0	0	0	0	0	0	0	0	0	0	0	0	0	0	0	0	0	0	0	0	0	0	0	0	0	0	0	0	0	0	0	0	0	0	0	0	0
none	none	none	CaO	77.085	0.65	0.08	0.3	8.1	7.3	3_Literature	0	0	0	0	0	0	0	0	0	0	0	0	0	1	0	0	0	0	0	0	0	0	0	0	0	0	0	0	0	0	0	0	0	0	0	0	0	0	0
none	none	none	SrO	84.985	0.63	0.08	0.3	8.1	7.2	3_Literature	0	0	0	0	0	0	0	0	0	0	0	0	0	0	0	0	0	0	0	0	0	0	0	0	0	0	0	0	0	0	0	0	0	0	0	0	0	0	0
none	none	none	BaO	73.985	0.6	0.09	0.3	6.7	8.9	3_Literature	0	0	0	0	0	0	0	1	0	0	0	0	0	0	0	0	0	0	0	0	0	0	0	0	0	0	0	0	0	0	0	0	0	0	0	0	0	0	0
none	Pb	none	CaO	83.985	0.65	0.08	0.3	8.1	6.4	3_Literature	0	0	0	0	0	0	0	0	0	0	0	0	0	1	0	0	0	0	0	0	0	0	0	0	0	0	0	0	0	0	0	0	0	0	0	0	0	0	0
Sr	none	none	CaO	84.685	0.66	0.08	0.3	8.3	6.9	3_Literature	0	0	0	0	0	0	0	0	0	0	0	0	0	1	0	0	0	0	0	0	0	0	0	0	0	0	0	0	0	0	0	0	0	0	0	0	0	0	0
none	none	none	Al2O3	75.185	0.67	0.07	0.3	9.6	4.9	3_Literature	0	0	1	0	0	0	0	0	0	0	0	0	0	0	0	0	0	0	0	0	0	0	0	0	0	0	0	0	0	0	0	0	0	0	0	0	0	0	0
Na	Mn	none	MgO	84.985	0.68	0.33	0	2	11.6	3_Literature	0	0	0	0	0	0	0	0	0	0	0	0	0	0	0	0	0	0	0	0	0	0	0	0	0	0	0	0	0	0	0	0	0	0	0	0	0	0	0
none	none	none	SiO2	89.985	0.9	0.09	0	9.6	6.7	3_Literature	0	0	0	0	0	0	0	0	0	0	0	0	0	0	0	0	0	0	0	0	0	0	0	0	0	0	0	0	0	0	0	0	0	0	0	0	0	0	0
none	none	none	Al2O3	94.485	0.96	0.04	0	24	2.4	3_Literature	0	0	1	0	0	0	0	0	0	0	0	0	0	0	0	0	0	0	0	0	0	0	0	0	0	0	0	0	0	0	0	0	0	0	0	0	0	0	0
Al	none	none	ZrO2	89.985	0.9	0.09	0	9.6	0.3	3_Literature	0	1	0	0	0	0	0	0	0	0	0	0	0	0	0	0	0	0	0	0	0	0	0	0	0	0	0	0	0	0	0	0	0	0	0	0	0	0	0
Pb	none	none	Al2O3	75.685	0.96	0.05	0	19.2	3.4	3_Literature	0	0	1	0	0	0	0	0	0	0	0	0	0	0	0	0	0	0	0	0	0	0	0	0	0	0	0	0	0	0	0	0	0	0	0	0	0	0	0
Pb	none	none	SiO2	82.985	0.96	0.05	0	19.2	7.3	3_Literature	0	0	0	0	0	0	0	0	0	0	0	0	0	0	0	0	0	0	0	0	0	0	0	0	0	0	0	0	0	0	0	0	0	0	0	0	0	0	0
Na	Pb	none	SiO2	85.485	0.96	0.05	0	19.2	6.3	3_Literature	0	0	0	0	0	0	0	0	0	0	0	0	0	0	0	0	0	0	0	0	0	0	0	0	0	0	0	0	0	0	0	0	0	0	0	0	0	0	0
Na	Pb	none	SiO2	78.885	0.97	0.03	0	32.3	3.4	3_Literature	0	0	0	0	0	0	0	0	0	0	0	0	0	0	0	0	0	0	0	0	0	0	0	0	0	0	0	0	0	0	0	0	0	0	0	0	0	0	0
Mg	Pb	none	SiO2	78.885	0.97	0.03	0	32.3	1.1	3_Literature	0	0	0	0	0	0	0	0	0	0	0	0	0	0	0	0	0	0	0	0	0	0	0	0	0	0	0	0	0	0	0	0	0	0	0	0	0	0	0
Pb	W	none	SiO2	84.985	0.97	0.03	0	32.3	2	3_Literature	0	0	0	0	0	0	0	0	0	0	0	0	0	0	0	0	0	0	0	0	0	0	0	0	0	0	0	0	0	0	0	0	0	0	0	0	0	0	0
Pb	Mo	none	SiO2	84.985	0.97	0.03	0	32.3	1	3_Literature	0	0	0	0	0	0	0	0	0	0	0	0	0	0	0	0	0	0	0	0	0	0	0	0	0	0	0	0	0	0	0	0	0	0	0	0	0	0	0
Li	none	none	La2O3	79.985	0.3	0.05	0.7	6	15.2	3_Literature	0	0	0	0	0	0	0	0	0	0	0	0	0	0	0	0	0	0	0	0	0	0	0	0	0	0	0	0	0	0	0	0	0	0	0	0	1	1	0
Na	none	none	La2O3	79.985	0.3	0.05	0.7	6	12.9	3_Literature	0	0	0	0	0	0	0	0	0	0	0	0	0	0	0	0	0	0	0	0	0	0	0	0	0	0	0	0	0	0	0	0	0	0	0	0	1	0	0
K	none	none	La2O3	79.985	0.3	0.05	0.7	6	12.4	3_Literature	0	0	0	0	0	0	0	0	0	0	0	0	0	0	0	0	0	0	0	0	0	0	0	0	0	0	0	0	0	0	0	0	0	1	0	0	1	0	0
Mg	none	none	La2O3	74.985	0.3	0.05	0.7	6	12.4	3_Literature	0	0	0	0	0	0	0	0	0	0	0	0	0	0	0	0	0	0	0	0	0	0	0	0	0	0	0	0	0	0	0	0	0	0	0	0	1	0	0
Ca	none	none	La2O3	74.985	0.3	0.05	0.7	6	11.6	3_Literature	0	0	0	0	0	0	0	0	0	0	0	0	1	0	0	0	0	0	0	0	0	0	0	0	0	0	0	0	0	0	0	0	0	0	0	0	1	0	0
Sr	none	none	La2O3	74.985	0.3	0.05	0.7	6	13.2	3_Literature	0	0	0	0	0	0	0	0	0	0	0	0	0	0	0	0	0	0	0	0	0	0	0	0	0	0	0	0	0	0	0	0	0	0	0	0	1	0	0
Ba	none	none	La2O3	79.985	0.3	0.05	0.7	6	13	3_Literature	0	0	0	0	0	0	1	0	0	0	0	0	0	0	0	0	0	0	0	0	0	0	0	0	0	0	0	0	0	0	0	0	0	0	0	0	1	0	0
Pb	none	none	La2O3	74.985	0.3	0.05	0.7	6	10.7	3_Literature	0	0	0	0	0	0	0	0	0	0	0	0	0	0	0	0	0	0	0	0	0	0	0	0	0	0	0	0	0	0	0	0	0	0	0	0	1	0	0
Bi	none	none	La2O3	74.985	0.3	0.05	0.7	6	11.3	3_Literature	0	0	0	0	0	0	0	0	0	0	1	0	0	0	0	0	0	0	0	0	0	0	0	0	0	0	0	0	0	0	0	0	0	0	0	0	1	0	0
Ag	none	none	La2O3	79.985	0.3	0.05	0.7	6	11.9	3_Literature	1	0	0	0	0	0	0	0	0	0	0	0	0	0	0	0	0	0	0	0	0	0	0	0	0	0	0	0	0	0	0	0	0	0	0	0	1	0	0
Li	none	none	MgO	84.985	0.3	0.05	0.7	6	14.2	3_Literature	0	0	0	0	0	0	0	0	0	0	0	0	0	0	0	0	0	0	0	0	0	0	0	0	0	0	0	0	0	0	0	0	0	0	0	0	0	1	0
Na	none	none	MgO	79.985	0.3	0.05	0.7	6	11.5	3_Literature	0	0	0	0	0	0	0	0	0	0	0	0	0	0	0	0	0	0	0	0	0	0	0	0	0	0	0	0	0	0	0	0	0	0	0	0	0	0	0
K	none	none	MgO	89.985	0.3	0.05	0.7	6	10.8	3_Literature	0	0	0	0	0	0	0	0	0	0	0	0	0	0	0	0	0	0	0	0	0	0	0	0	0	0	0	0	0	0	0	0	0	1	0	0	0	0	0
Y	none	none	MgO	89.985	0.3	0.05	0.7	6	9.2	3_Literature	0	0	0	0	0	0	0	0	0	0	0	0	0	0	0	0	0	0	0	0	0	0	0	0	0	0	0	0	0	0	0	0	0	0	0	0	0	0	0
La	none	none	MgO	84.985	0.3	0.05	0.7	6	9.3	3_Literature	0	0	0	0	0	0	0	0	0	0	0	0	0	0	0	0	0	0	0	0	0	0	0	0	0	0	0	0	0	0	0	0	0	0	0	1	0	0	0
Ba	none	none	MgO	84.985	0.3	0.05	0.7	6	9.8	3_Literature	0	0	0	0	0	0	1	0	0	0	0	0	0	0	0	0	0	0	0	0	0	0	0	0	0	0	0	0	0	0	0	0	0	0	0	0	0	0	0
Sr	none	none	La2O3	74.985	0.3	0.05	0.7	6	13.6	3_Literature	0	0	0	0	0	0	0	0	0	0	0	0	0	0	0	0	0	0	0	0	0	0	0	0	0	0	0	0	0	0	0	0	0	0	0	0	1	0	0
Sr	none	none	La2O3	74.985	0.3	0.05	0.7	6	14	3_Literature	0	0	0	0	0	0	0	0	0	0	0	0	0	0	0	0	0	0	0	0	0	0	0	0	0	0	0	0	0	0	0	0	0	0	0	0	1	0	0
Sr	none	none	La2O3	74.985	0.3	0.05	0.7	6	13.3	3_Literature	0	0	0	0	0	0	0	0	0	0	0	0	0	0	0	0	0	0	0	0	0	0	0	0	0	0	0	0	0	0	0	0	0	0	0	0	1	0	0
Sr	none	none	La2O3	74.985	0.3	0.05	0.7	6	13.6	3_Literature	0	0	0	0	0	0	0	0	0	0	0	0	0	0	0	0	0	0	0	0	0	0	0	0	0	0	0	0	0	0	0	0	0	0	0	0	1	0	0
Sr	none	none	La2O3	74.985	0.3	0.05	0.7	6	12.4	3_Literature	0	0	0	0	0	0	0	0	0	0	0	0	0	0	0	0	0	0	0	0	0	0	0	0	0	0	0	0	0	0	0	0	0	0	0	0	1	0	0
none	Ce	Re	La2O3	74.985	0.3	0.05	0.7	6	7.9	3_Literature	0	0	0	0	0	0	0	0	0	0	0	0	0	0	0	1	0	0	0	0	0	0	0	0	0	0	0	0	0	0	0	0	0	0	0	0	1	0	0
none	Ce	Re	La2O3	74.985	0.3	0.05	0.7	6	7.8	3_Literature	0	0	0	0	0	0	0	0	0	0	0	0	0	0	0	1	0	0	0	0	0	0	0	0	0	0	0	0	0	0	0	0	0	0	0	0	1	0	0
Pb	none	none	SiO2	89.985	0.3	0.05	0.7	6	4.9	3_Literature	0	0	0	0	0	0	0	0	0	0	0	0	0	0	0	0	0	0	0	0	0	0	0	0	0	0	0	0	0	0	0	0	0	0	0	0	0	0	0
none	none	none	MgO	89.985	0.3	0.05	0.7	6	9.1	3_Literature	0	0	0	0	0	0	0	0	0	0	0	0	0	0	0	0	0	0	0	0	0	0	0	0	0	0	0	0	0	0	0	0	0	0	0	0	0	0	0
none	none	none	CaO	74.985	0.3	0.05	0.7	6	6.3	3_Literature	0	0	0	0	0	0	0	0	0	0	0	0	0	1	0	0	0	0	0	0	0	0	0	0	0	0	0	0	0	0	0	0	0	0	0	0	0	0	0
none	none	none	SrO	84.985	0.3	0.05	0.7	6	5.5	3_Literature	0	0	0	0	0	0	0	0	0	0	0	0	0	0	0	0	0	0	0	0	0	0	0	0	0	0	0	0	0	0	0	0	0	0	0	0	0	0	0
none	none	none	Sc2O3	89.985	0.3	0.05	0.7	6	8.3	3_Literature	0	0	0	0	0	0	0	0	0	0	0	0	0	0	0	0	0	0	0	0	0	0	0	0	0	0	0	0	0	0	0	0	0	0	0	0	0	0	0
none	none	none	Y2O3	79.985	0.3	0.05	0.7	6	9.8	3_Literature	0	0	0	0	0	0	0	0	0	0	0	0	0	0	0	0	0	0	0	0	0	0	0	0	0	0	0	0	0	0	0	0	0	0	0	0	0	0	0
none	none	none	La2O3	74.985	0.3	0.05	0.7	6	11.1	3_Literature	0	0	0	0	0	0	0	0	0	0	0	0	0	0	0	0	0	0	0	0	0	0	0	0	0	0	0	0	0	0	0	0	0	0	0	0	1	0	0
none	none	none	Pr2O3	84.985	0.3	0.05	0.7	6	2.9	3_Literature	0	0	0	0	0	0	0	0	0	0	0	0	0	0	0	0	0	0	0	0	0	0	0	0	0	0	0	0	0	0	0	0	0	0	0	0	0	0	0
none	none	none	Nd2O3	74.985	0.3	0.05	0.7	6	9.7	3_Literature	0	0	0	0	0	0	0	0	0	0	0	0	0	0	0	0	0	0	0	0	0	0	0	0	0	0	0	0	0	0	0	0	0	0	0	0	0	0	0
none	none	none	Sm2O3	74.985	0.3	0.05	0.7	6	9.5	3_Literature	0	0	0	0	0	0	0	0	0	0	0	0	0	0	0	0	0	0	0	0	0	0	0	0	0	0	0	0	0	0	0	0	0	0	0	0	0	0	0
none	none	none	Eu2O3	69.985	0.3	0.05	0.7	6	9.6	3_Literature	0	0	0	0	0	0	0	0	0	0	0	0	0	0	0	0	0	0	0	0	0	0	0	0	0	1	0	0	0	0	0	0	0	0	0	0	0	0	0
none	none	none	Gd2O3	79.985	0.3	0.05	0.7	6	11.2	3_Literature	0	0	0	0	0	0	0	0	0	0	0	0	0	0	0	0	0	0	0	0	0	0	0	0	0	0	0	0	0	1	0	0	0	0	0	0	0	0	0
none	none	none	CeO2	74.985	0.3	0.05	0.7	6	0.2	3_Literature	0	0	0	0	0	0	0	0	0	0	0	0	0	0	0	0	1	0	0	0	0	0	0	0	0	0	0	0	0	0	0	0	0	0	0	0	0	0	0
Pb	none	none	SiO2	73.985	0.7	0.07	0.2	10	5.4	3_Literature	0	0	0	0	0	0	0	0	0	0	0	0	0	0	0	0	0	0	0	0	0	0	0	0	0	0	0	0	0	0	0	0	0	0	0	0	0	0	0
Na	none	none	MgO	79.985	0.03	0.01	1	1.9	22.2	3_Literature	0	0	0	0	0	0	0	0	0	0	0	0	0	0	0	0	0	0	0	0	0	0	0	0	0	0	0	0	0	0	0	0	0	0	0	0	0	0	0
Li	none	none	Sm2O3	74.985	0.05	0.02	0.9	2.5	20.2	3_Literature	0	0	0	0	0	0	0	0	0	0	0	0	0	0	0	0	0	0	0	0	0	0	0	0	0	0	0	0	0	0	0	0	0	0	0	0	0	1	0
Li	none	none	ZnO	73.985	0.11	0.06	0.8	1.9	24.8	3_Literature	0	0	0	0	0	0	0	0	0	0	0	0	0	0	0	0	0	0	0	0	0	0	0	0	0	0	0	0	0	0	0	0	0	0	0	0	0	1	0
Pb	none	none	MgO	74.985	0.61	0.02	0.4	38.3	6.6	3_Literature	0	0	0	0	0	0	0	0	0	0	0	0	0	0	0	0	0	0	0	0	0	0	0	0	0	0	0	0	0	0	0	0	0	0	0	0	0	0	0
Li	none	none	CaO	71.085	0.5	0.11	0.4	4.7	13.2	3_Literature	0	0	0	0	0	0	0	0	0	0	0	0	0	1	0	0	0	0	0	0	0	0	0	0	0	0	0	0	0	0	0	0	0	0	0	0	0	1	0
Li	none	none	Sm2O3	74.985	0.05	0.02	0.9	2.5	22.3	3_Literature	0	0	0	0	0	0	0	0	0	0	0	0	0	0	0	0	0	0	0	0	0	0	0	0	0	0	0	0	0	0	0	0	0	0	0	0	0	1	0
Li	none	none	BaO	79.985	0.03	0.01	1	1.9	18.5	3_Literature	0	0	0	0	0	0	0	1	0	0	0	0	0	0	0	0	0	0	0	0	0	0	0	0	0	0	0	0	0	0	0	0	0	0	0	0	0	1	0
Na	none	none	BaO	79.985	0.03	0.01	1	1.9	15.1	3_Literature	0	0	0	0	0	0	0	1	0	0	0	0	0	0	0	0	0	0	0	0	0	0	0	0	0	0	0	0	0	0	0	0	0	0	0	0	0	0	0
K	none	none	BaO	79.985	0.03	0.01	1	1.9	20.2	3_Literature	0	0	0	0	0	0	0	1	0	0	0	0	0	0	0	0	0	0	0	0	0	0	0	0	0	0	0	0	0	0	0	0	0	1	0	0	0	0	0
Rb	none	none	BaO	79.985	0.03	0.01	1	1.9	17.1	3_Literature	0	0	0	0	0	0	0	1	0	0	0	0	0	0	0	0	0	0	0	0	0	0	0	0	0	0	0	0	0	0	0	0	0	0	0	0	0	0	0
Pb	none	none	Al2O3	64.985	0.57	0.09	0.3	6.4	7.4	3_Literature	0	0	1	0	0	0	0	0	0	0	0	0	0	0	0	0	0	0	0	0	0	0	0	0	0	0	0	0	0	0	0	0	0	0	0	0	0	0	0
Bi	K	none	Al2O3	63.985	0.51	0.25	0.3	2	1.6	3_Literature	0	0	1	0	0	0	0	0	0	0	1	0	0	0	0	0	0	0	0	0	0	0	0	0	0	0	0	0	0	0	0	0	0	1	0	0	0	0	0
Li	Ca	none	CaO	73.985	0.52	0.06	0.4	9	10.5	3_Literature	0	0	0	0	0	0	0	0	0	0	0	0	1	1	0	0	0	0	0	0	0	0	0	0	0	0	0	0	0	0	0	0	0	0	0	0	0	1	0
Li	Ca	none	CaO	73.985	0.52	0.06	0.4	9	10.1	3_Literature	0	0	0	0	0	0	0	0	0	0	0	0	1	1	0	0	0	0	0	0	0	0	0	0	0	0	0	0	0	0	0	0	0	0	0	0	0	1	0
Li	Ca	none	CaO	73.985	0.52	0.06	0.4	9	10.1	3_Literature	0	0	0	0	0	0	0	0	0	0	0	0	1	1	0	0	0	0	0	0	0	0	0	0	0	0	0	0	0	0	0	0	0	0	0	0	0	1	0
Na	Ca	none	CaO	73.985	0.52	0.06	0.4	9	13.3	3_Literature	0	0	0	0	0	0	0	0	0	0	0	0	1	1	0	0	0	0	0	0	0	0	0	0	0	0	0	0	0	0	0	0	0	0	0	0	0	0	0
Na	Ca	none	CaO	73.985	0.52	0.06	0.4	9	12.2	3_Literature	0	0	0	0	0	0	0	0	0	0	0	0	1	1	0	0	0	0	0	0	0	0	0	0	0	0	0	0	0	0	0	0	0	0	0	0	0	0	0
Na	Ca	none	CaO	73.985	0.52	0.06	0.4	9	10.6	3_Literature	0	0	0	0	0	0	0	0	0	0	0	0	1	1	0	0	0	0	0	0	0	0	0	0	0	0	0	0	0	0	0	0	0	0	0	0	0	0	0
K	Ca	none	CaO	73.985	0.52	0.06	0.4	9	10.9	3_Literature	0	0	0	0	0	0	0	0	0	0	0	0	1	1	0	0	0	0	0	0	0	0	0	0	0	0	0	0	0	0	0	0	0	1	0	0	0	0	0
K	Ca	none	CaO	73.985	0.52	0.06	0.4	9	10.1	3_Literature	0	0	0	0	0	0	0	0	0	0	0	0	1	1	0	0	0	0	0	0	0	0	0	0	0	0	0	0	0	0	0	0	0	1	0	0	0	0	0
K	Ca	none	CaO	73.985	0.52	0.06	0.4	9	9.7	3_Literature	0	0	0	0	0	0	0	0	0	0	0	0	1	1	0	0	0	0	0	0	0	0	0	0	0	0	0	0	0	0	0	0	0	1	0	0	0	0	0
Ca	none	none	CaO	76.685	0.64	0.08	0.3	8.2	6.1	3_Literature	0	0	0	0	0	0	0	0	0	0	0	0	1	1	0	0	0	0	0	0	0	0	0	0	0	0	0	0	0	0	0	0	0	0	0	0	0	0	0
Pb	none	none	MgO	78.385	0.64	0.08	0.3	8.2	9	3_Literature	0	0	0	0	0	0	0	0	0	0	0	0	0	0	0	0	0	0	0	0	0	0	0	0	0	0	0	0	0	0	0	0	0	0	0	0	0	0	0
Pb	Si	none	CaO	78.085	0.64	0.08	0.3	8.2	4.1	3_Literature	0	0	0	0	0	0	0	0	0	0	0	0	0	1	0	0	0	0	0	0	0	0	0	0	0	0	0	0	0	0	0	0	0	0	0	0	0	0	0
Na	none	none	CaO	73.985	0.35	0.14	0.5	2.4	16.8	3_Literature	0	0	0	0	0	0	0	0	0	0	0	0	0	1	0	0	0	0	0	0	0	0	0	0	0	0	0	0	0	0	0	0	0	0	0	0	0	0	0
Li	none	none	CaO	73.985	0.52	0.06	0.4	9	12.3	3_Literature	0	0	0	0	0	0	0	0	0	0	0	0	0	1	0	0	0	0	0	0	0	0	0	0	0	0	0	0	0	0	0	0	0	0	0	0	0	1	0
Na	none	none	CaO	73.985	0.52	0.06	0.4	9	12.5	3_Literature	0	0	0	0	0	0	0	0	0	0	0	0	0	1	0	0	0	0	0	0	0	0	0	0	0	0	0	0	0	0	0	0	0	0	0	0	0	0	0
K	none	none	CaO	73.985	0.52	0.06	0.4	9	10.8	3_Literature	0	0	0	0	0	0	0	0	0	0	0	0	0	1	0	0	0	0	0	0	0	0	0	0	0	0	0	0	0	0	0	0	0	1	0	0	0	0	0
Pb	none	none	CaO	76.685	0.64	0.08	0.3	8.2	4.3	3_Literature	0	0	0	0	0	0	0	0	0	0	0	0	0	1	0	0	0	0	0	0	0	0	0	0	0	0	0	0	0	0	0	0	0	0	0	0	0	0	0
Pb	none	none	CaO	76.685	0.64	0.08	0.3	8.2	3.2	3_Literature	0	0	0	0	0	0	0	0	0	0	0	0	0	1	0	0	0	0	0	0	0	0	0	0	0	0	0	0	0	0	0	0	0	0	0	0	0	0	0
Pb	none	none	CaO	76.685	0.64	0.08	0.3	8.2	2.6	3_Literature	0	0	0	0	0	0	0	0	0	0	0	0	0	1	0	0	0	0	0	0	0	0	0	0	0	0	0	0	0	0	0	0	0	0	0	0	0	0	0
none	none	none	MgO	78.385	0.64	0.08	0.3	8.2	5.8	3_Literature	0	0	0	0	0	0	0	0	0	0	0	0	0	0	0	0	0	0	0	0	0	0	0	0	0	0	0	0	0	0	0	0	0	0	0	0	0	0	0
Pb	none	none	MgO	78.385	0.64	0.08	0.3	8.2	8.6	3_Literature	0	0	0	0	0	0	0	0	0	0	0	0	0	0	0	0	0	0	0	0	0	0	0	0	0	0	0	0	0	0	0	0	0	0	0	0	0	0	0
Pb	none	none	MgO	78.385	0.64	0.08	0.3	8.2	7.9	3_Literature	0	0	0	0	0	0	0	0	0	0	0	0	0	0	0	0	0	0	0	0	0	0	0	0	0	0	0	0	0	0	0	0	0	0	0	0	0	0	0
none	Si	none	CaO	78.385	0.64	0.08	0.3	8.2	4.7	3_Literature	0	0	0	0	0	0	0	0	0	0	0	0	0	1	0	0	0	0	0	0	0	0	0	0	0	0	0	0	0	0	0	0	0	0	0	0	0	0	0
none	none	none	SiO2	78.385	0.64	0.08	0.3	8.2	4.4	3_Literature	0	0	0	0	0	0	0	0	0	0	0	0	0	0	0	0	0	0	0	0	0	0	0	0	0	0	0	0	0	0	0	0	0	0	0	0	0	0	0
Pb	none	none	SiO2	78.385	0.64	0.08	0.3	8.2	2.6	3_Literature	0	0	0	0	0	0	0	0	0	0	0	0	0	0	0	0	0	0	0	0	0	0	0	0	0	0	0	0	0	0	0	0	0	0	0	0	0	0	0
Pb	none	none	SiO2	78.385	0.64	0.08	0.3	8.2	7	3_Literature	0	0	0	0	0	0	0	0	0	0	0	0	0	0	0	0	0	0	0	0	0	0	0	0	0	0	0	0	0	0	0	0	0	0	0	0	0	0	0
none	none	none	Al2O3	78.385	0.64	0.08	0.3	8.2	1.2	3_Literature	0	0	1	0	0	0	0	0	0	0	0	0	0	0	0	0	0	0	0	0	0	0	0	0	0	0	0	0	0	0	0	0	0	0	0	0	0	0	0
Na	none	none	CaO	73.985	0.66	0.08	0.3	8.3	9.6	3_Literature	0	0	0	0	0	0	0	0	0	0	0	0	0	1	0	0	0	0	0	0	0	0	0	0	0	0	0	0	0	0	0	0	0	0	0	0	0	0	0
none	none	none	MgO	73.985	0.64	0.08	0.3	8.2	4.5	3_Literature	0	0	0	0	0	0	0	0	0	0	0	0	0	0	0	0	0	0	0	0	0	0	0	0	0	0	0	0	0	0	0	0	0	0	0	0	0	0	0
Pb	none	none	Al2O3	73.985	0.66	0.07	0.3	9.4	5.7	3_Literature	0	0	1	0	0	0	0	0	0	0	0	0	0	0	0	0	0	0	0	0	0	0	0	0	0	0	0	0	0	0	0	0	0	0	0	0	0	0	0
Pb	none	none	SiO2	72.985	0.66	0.07	0.3	9.4	0.2	3_Literature	0	0	0	0	0	0	0	0	0	0	0	0	0	0	0	0	0	0	0	0	0	0	0	0	0	0	0	0	0	0	0	0	0	0	0	0	0	0	0
none	none	none	Pb2O3	73.985	0.65	0.07	0.3	9.3	0.3	3_Literature	0	0	0	0	0	0	0	0	0	0	0	0	0	0	0	0	0	0	0	0	0	0	0	0	0	0	0	0	0	0	0	0	0	0	0	0	0	0	0
Na	Pb	none	Al2O3	74.985	0.7	0.07	0.2	10	4.9	3_Literature	0	0	1	0	0	0	0	0	0	0	0	0	0	0	0	0	0	0	0	0	0	0	0	0	0	0	0	0	0	0	0	0	0	0	0	0	0	0	0
Li	Pb	none	Al2O3	74.985	0.7	0.07	0.2	10	5.7	3_Literature	0	0	1	0	0	0	0	0	0	0	0	0	0	0	0	0	0	0	0	0	0	0	0	0	0	0	0	0	0	0	0	0	0	0	0	0	0	1	0
K	Pb	none	Al2O3	74.985	0.7	0.07	0.2	10	5.7	3_Literature	0	0	1	0	0	0	0	0	0	0	0	0	0	0	0	0	0	0	0	0	0	0	0	0	0	0	0	0	0	0	0	0	0	1	0	0	0	0	0
Ca	Pb	none	Al2O3	74.985	0.7	0.07	0.2	10	5.6	3_Literature	0	0	1	0	0	0	0	0	0	0	0	0	1	0	0	0	0	0	0	0	0	0	0	0	0	0	0	0	0	0	0	0	0	0	0	0	0	0	0
none	none	none	Li2O	74.985	0.7	0.07	0.2	10	1	3_Literature	0	0	0	0	0	0	0	0	0	0	0	0	0	0	0	0	0	0	0	0	0	0	0	0	0	0	0	0	0	0	0	0	0	0	0	0	0	0	1
none	none	none	Na2O	74.985	0.7	0.07	0.2	10	0.6	3_Literature	0	0	0	0	0	0	0	0	0	0	0	0	0	0	0	0	0	0	0	0	0	0	0	0	0	0	0	0	0	0	0	0	0	0	0	0	0	0	0
none	none	none	CaO	74.985	0.7	0.07	0.2	10	3.4	3_Literature	0	0	0	0	0	0	0	0	0	0	0	0	0	1	0	0	0	0	0	0	0	0	0	0	0	0	0	0	0	0	0	0	0	0	0	0	0	0	0
none	none	none	MgO	74.985	0.7	0.07	0.2	10	1.7	3_Literature	0	0	0	0	0	0	0	0	0	0	0	0	0	0	0	0	0	0	0	0	0	0	0	0	0	0	0	0	0	0	0	0	0	0	0	0	0	0	0
none	none	none	BaO	74.985	0.7	0.07	0.2	10	0.1	3_Literature	0	0	0	0	0	0	0	1	0	0	0	0	0	0	0	0	0	0	0	0	0	0	0	0	0	0	0	0	0	0	0	0	0	0	0	0	0	0	0
Li	none	none	CaO	74.985	0.67	0.07	0.3	9.6	6.7	3_Literature	0	0	0	0	0	0	0	0	0	0	0	0	0	1	0	0	0	0	0	0	0	0	0	0	0	0	0	0	0	0	0	0	0	0	0	0	0	1	0
Na	none	none	CaO	74.985	0.67	0.07	0.3	9.6	7.1	3_Literature	0	0	0	0	0	0	0	0	0	0	0	0	0	1	0	0	0	0	0	0	0	0	0	0	0	0	0	0	0	0	0	0	0	0	0	0	0	0	0
K	none	none	CaO	74.985	0.67	0.07	0.3	9.6	7.6	3_Literature	0	0	0	0	0	0	0	0	0	0	0	0	0	1	0	0	0	0	0	0	0	0	0	0	0	0	0	0	0	0	0	0	0	1	0	0	0	0	0
Mg	none	none	CaO	74.985	0.67	0.07	0.3	9.6	4.1	3_Literature	0	0	0	0	0	0	0	0	0	0	0	0	0	1	0	0	0	0	0	0	0	0	0	0	0	0	0	0	0	0	0	0	0	0	0	0	0	0	0
Sr	none	none	CaO	74.985	0.67	0.07	0.3	9.6	5	3_Literature	0	0	0	0	0	0	0	0	0	0	0	0	0	1	0	0	0	0	0	0	0	0	0	0	0	0	0	0	0	0	0	0	0	0	0	0	0	0	0
Ba	none	none	CaO	74.985	0.67	0.07	0.3	9.6	6.3	3_Literature	0	0	0	0	0	0	1	0	0	0	0	0	0	1	0	0	0	0	0	0	0	0	0	0	0	0	0	0	0	0	0	0	0	0	0	0	0	0	0
Pb	none	none	CaO	74.985	0.67	0.07	0.3	9.6	2.7	3_Literature	0	0	0	0	0	0	0	0	0	0	0	0	0	1	0	0	0	0	0	0	0	0	0	0	0	0	0	0	0	0	0	0	0	0	0	0	0	0	0
Pb	none	none	Al2O3	78.385	0.64	0.08	0.3	8.2	1.3	3_Literature	0	0	1	0	0	0	0	0	0	0	0	0	0	0	0	0	0	0	0	0	0	0	0	0	0	0	0	0	0	0	0	0	0	0	0	0	0	0	0
Pb	none	none	Al2O3	78.385	0.64	0.08	0.3	8.2	5.7	3_Literature	0	0	1	0	0	0	0	0	0	0	0	0	0	0	0	0	0	0	0	0	0	0	0	0	0	0	0	0	0	0	0	0	0	0	0	0	0	0	0
Li	none	none	MgO	61.985	0.48	0.11	0.4	4.5	10.3	3_Literature	0	0	0	0	0	0	0	0	0	0	0	0	0	0	0	0	0	0	0	0	0	0	0	0	0	0	0	0	0	0	0	0	0	0	0	0	0	1	0
Li	none	none	MgO	69.985	0.47	0.11	0.4	4.4	15.6	3_Literature	0	0	0	0	0	0	0	0	0	0	0	0	0	0	0	0	0	0	0	0	0	0	0	0	0	0	0	0	0	0	0	0	0	0	0	0	0	1	0
Li	none	none	CaO	71.085	0.47	0.11	0.4	4.4	11.7	3_Literature	0	0	0	0	0	0	0	0	0	0	0	0	0	1	0	0	0	0	0	0	0	0	0	0	0	0	0	0	0	0	0	0	0	0	0	0	0	1	0
Na	none	none	CaO	70.885	0.47	0.11	0.4	4.4	11.2	3_Literature	0	0	0	0	0	0	0	0	0	0	0	0	0	1	0	0	0	0	0	0	0	0	0	0	0	0	0	0	0	0	0	0	0	0	0	0	0	0	0
Li	none	none	MgO	76.985	0.38	0.13	0.5	3	31.3	3_Literature	0	0	0	0	0	0	0	0	0	0	0	0	0	0	0	0	0	0	0	0	0	0	0	0	0	0	0	0	0	0	0	0	0	0	0	0	0	1	0
Sn	Li	none	MgO	70.385	0.47	0.11	0.4	4.4	14.3	3_Literature	0	0	0	0	0	0	0	0	0	0	0	0	0	0	0	0	0	0	0	0	0	0	0	0	0	0	0	0	0	0	0	0	0	0	0	0	0	1	0
none	none	none	ZrO2	69.985	0.47	0.11	0.4	4.2	0.3	3_Literature	0	0	0	0	0	0	0	0	0	0	0	0	0	0	0	0	0	0	0	0	0	0	0	0	0	0	0	0	0	0	0	0	0	0	0	0	0	0	0
Na	none	none	La2O3	70.285	0.5	0.1	0.4	4.7	31.8	3_Literature	0	0	0	0	0	0	0	0	0	0	0	0	0	0	0	0	0	0	0	0	0	0	0	0	0	0	0	0	0	0	0	0	0	0	0	0	1	0	0
K	none	none	La2O3	70.085	0.5	0.1	0.4	4.7	28.3	3_Literature	0	0	0	0	0	0	0	0	0	0	0	0	0	0	0	0	0	0	0	0	0	0	0	0	0	0	0	0	0	0	0	0	0	1	0	0	1	0	0
Li	none	none	La2O3	79.985	0.3	0.05	0.7	6	15.6	3_Literature	0	0	0	0	0	0	0	0	0	0	0	0	0	0	0	0	0	0	0	0	0	0	0	0	0	0	0	0	0	0	0	0	0	0	0	0	1	1	0
Sr	none	none	La2O3	74.985	0.3	0.05	0.7	6	13.4	3_Literature	0	0	0	0	0	0	0	0	0	0	0	0	0	0	0	0	0	0	0	0	0	0	0	0	0	0	0	0	0	0	0	0	0	0	0	0	1	0	0
none	none	none	La2O3	74.985	0.3	0.05	0.7	6	11.4	3_Literature	0	0	0	0	0	0	0	0	0	0	0	0	0	0	0	0	0	0	0	0	0	0	0	0	0	0	0	0	0	0	0	0	0	0	0	0	1	0	0
Na	Pb	none	SiO2	83.985	0.83	0.04	0.1	23.8	4.8	3_Literature	0	0	0	0	0	0	0	0	0	0	0	0	0	0	0	0	0	0	0	0	0	0	0	0	0	0	0	0	0	0	0	0	0	0	0	0	0	0	0
Li	none	none	MgO	69.985	0.47	0.11	0.4	4.4	14.6	3_Literature	0	0	0	0	0	0	0	0	0	0	0	0	0	0	0	0	0	0	0	0	0	0	0	0	0	0	0	0	0	0	0	0	0	0	0	0	0	1	0
Li	none	none	MgO	68.485	0.47	0.11	0.4	4.4	17.6	3_Literature	0	0	0	0	0	0	0	0	0	0	0	0	0	0	0	0	0	0	0	0	0	0	0	0	0	0	0	0	0	0	0	0	0	0	0	0	0	1	0
Sn	Li	none	MgO	70.385	0.47	0.11	0.4	4.4	16.6	3_Literature	0	0	0	0	0	0	0	0	0	0	0	0	0	0	0	0	0	0	0	0	0	0	0	0	0	0	0	0	0	0	0	0	0	0	0	0	0	1	0
none	none	none	MgO	70.485	0.47	0.11	0.4	4.4	2.5	3_Literature	0	0	0	0	0	0	0	0	0	0	0	0	0	0	0	0	0	0	0	0	0	0	0	0	0	0	0	0	0	0	0	0	0	0	0	0	0	0	0
Li	none	none	SiO2	71.585	0.47	0.11	0.4	4.4	0.2	3_Literature	0	0	0	0	0	0	0	0	0	0	0	0	0	0	0	0	0	0	0	0	0	0	0	0	0	0	0	0	0	0	0	0	0	0	0	0	0	1	0
Li	none	none	Al2O3	69.985	0.47	0.11	0.4	4.4	0.4	3_Literature	0	0	1	0	0	0	0	0	0	0	0	0	0	0	0	0	0	0	0	0	0	0	0	0	0	0	0	0	0	0	0	0	0	0	0	0	0	1	0
Pb	none	none	Al2O3	66.985	0.47	0.11	0.4	4.4	2.9	3_Literature	0	0	1	0	0	0	0	0	0	0	0	0	0	0	0	0	0	0	0	0	0	0	0	0	0	0	0	0	0	0	0	0	0	0	0	0	0	0	0
Pb	Li	none	Al2O3	70.485	0.47	0.11	0.4	4.4	2.1	3_Literature	0	0	1	0	0	0	0	0	0	0	0	0	0	0	0	0	0	0	0	0	0	0	0	0	0	0	0	0	0	0	0	0	0	0	0	0	0	1	0
Ba	none	none	CeO2	74.985	0.73	0.28	0	2.6	4.5	3_Literature	0	0	0	0	0	0	1	0	0	0	0	0	0	0	0	0	1	0	0	0	0	0	0	0	0	0	0	0	0	0	0	0	0	0	0	0	0	0	0
none	none	none	Sm2O3	74.985	0.87	0.14	0	6.1	12.2	3_Literature	0	0	0	0	0	0	0	0	0	0	0	0	0	0	0	0	0	0	0	0	0	0	0	0	0	0	0	0	0	0	0	0	0	0	0	0	0	0	0
Ba	none	none	CaO	79.985	0.4	0.08	0.5	5	12.3	3_Literature	0	0	0	0	0	0	1	0	0	0	0	0	0	1	0	0	0	0	0	0	0	0	0	0	0	0	0	0	0	0	0	0	0	0	0	0	0	0	0
Pb	none	none	MgO	79.985	0.14	0.02	0.9	8.9	9.1	3_Literature	0	0	0	0	0	0	0	0	0	0	0	0	0	0	0	0	0	0	0	0	0	0	0	0	0	0	0	0	0	0	0	0	0	0	0	0	0	0	0
Pb	none	none	MgO	79.985	0.14	0.02	0.9	8.9	9.2	3_Literature	0	0	0	0	0	0	0	0	0	0	0	0	0	0	0	0	0	0	0	0	0	0	0	0	0	0	0	0	0	0	0	0	0	0	0	0	0	0	0
Li	none	none	Al2O3	79.085	0.68	0.07	0.3	9.9	9.9	3_Literature	0	0	1	0	0	0	0	0	0	0	0	0	0	0	0	0	0	0	0	0	0	0	0	0	0	0	0	0	0	0	0	0	0	0	0	0	0	1	0
Pb	none	none	Al2O3	71.285	0.5	0.1	0.4	4.8	9.1	3_Literature	0	0	1	0	0	0	0	0	0	0	0	0	0	0	0	0	0	0	0	0	0	0	0	0	0	0	0	0	0	0	0	0	0	0	0	0	0	0	0
Na	none	none	Al2O3	82.885	0.52	0.1	0.4	5.1	2.8	3_Literature	0	0	1	0	0	0	0	0	0	0	0	0	0	0	0	0	0	0	0	0	0	0	0	0	0	0	0	0	0	0	0	0	0	0	0	0	0	0	0
Ca	none	none	Al2O3	83.885	0.68	0.07	0.3	9.9	2.5	3_Literature	0	0	1	0	0	0	0	0	0	0	0	0	1	0	0	0	0	0	0	0	0	0	0	0	0	0	0	0	0	0	0	0	0	0	0	0	0	0	0
Bi	none	none	Al2O3	74.885	0.5	0.1	0.4	5	1	3_Literature	0	0	1	0	0	0	0	0	0	0	1	0	0	0	0	0	0	0	0	0	0	0	0	0	0	0	0	0	0	0	0	0	0	0	0	0	0	0	0
Mn	none	none	Al2O3	83.985	0.5	0.1	0.4	5	0.7	3_Literature	0	0	1	0	0	0	0	0	0	0	0	0	0	0	0	0	0	0	0	0	0	0	0	0	0	0	0	0	0	0	0	0	0	0	0	0	0	0	0
Fe	Cr	none	Al2O3	79.985	0.5	0.1	0.4	5	0.8	3_Literature	0	0	1	0	0	0	0	0	0	0	0	0	0	0	0	0	0	0	1	0	0	0	0	0	0	0	1	0	0	0	0	0	0	0	0	0	0	0	0
none	none	none	MgO	86.585	0.67	0.07	0.3	10.1	2.4	3_Literature	0	0	0	0	0	0	0	0	0	0	0	0	0	0	0	0	0	0	0	0	0	0	0	0	0	0	0	0	0	0	0	0	0	0	0	0	0	0	0
Li	none	none	MgO	80.285	0.51	0.11	0.4	4.7	12.4	3_Literature	0	0	0	0	0	0	0	0	0	0	0	0	0	0	0	0	0	0	0	0	0	0	0	0	0	0	0	0	0	0	0	0	0	0	0	0	0	1	0
Li	none	none	Al2O3	80.285	0.5	0.1	0.4	4.8	12.4	3_Literature	0	0	1	0	0	0	0	0	0	0	0	0	0	0	0	0	0	0	0	0	0	0	0	0	0	0	0	0	0	0	0	0	0	0	0	0	0	1	0
Na	Pb	none	Al2O3	82.185	0.5	0.1	0.4	4.8	10.4	3_Literature	0	0	1	0	0	0	0	0	0	0	0	0	0	0	0	0	0	0	0	0	0	0	0	0	0	0	0	0	0	0	0	0	0	0	0	0	0	0	0
Li	none	none	MgO	69.985	0.1	0.05	0.9	2	12.8	3_Literature	0	0	0	0	0	0	0	0	0	0	0	0	0	0	0	0	0	0	0	0	0	0	0	0	0	0	0	0	0	0	0	0	0	0	0	0	0	1	0
Pb	none	none	MgO	79.985	0.14	0.02	0.9	8.8	9.2	3_Literature	0	0	0	0	0	0	0	0	0	0	0	0	0	0	0	0	0	0	0	0	0	0	0	0	0	0	0	0	0	0	0	0	0	0	0	0	0	0	0
Li	none	none	MgO	76.985	0.91	0.09	0	10	7.9	3_Literature	0	0	0	0	0	0	0	0	0	0	0	0	0	0	0	0	0	0	0	0	0	0	0	0	0	0	0	0	0	0	0	0	0	0	0	0	0	1	0
Li	none	none	MgO	73.485	0.67	0.07	0.3	10	7.3	3_Literature	0	0	0	0	0	0	0	0	0	0	0	0	0	0	0	0	0	0	0	0	0	0	0	0	0	0	0	0	0	0	0	0	0	0	0	0	0	1	0
Ti	none	none	Li2O	75.985	0.67	0.33	0	2	12.1	3_Literature	0	0	0	0	0	0	0	0	0	0	0	0	0	0	0	0	0	0	0	0	0	0	0	0	0	0	0	0	0	0	0	0	0	0	0	0	0	0	1
Ce	none	none	Li2O	78.785	0.67	0.33	0	2	18.2	3_Literature	0	0	0	0	0	0	0	0	0	0	0	0	0	0	0	1	0	0	0	0	0	0	0	0	0	0	0	0	0	0	0	0	0	0	0	0	0	0	1
Zr	none	none	Li2O	79.385	0.67	0.33	0	2	17.1	3_Literature	0	0	0	0	0	0	0	0	0	0	0	0	0	0	0	0	0	0	0	0	0	0	0	0	0	0	0	0	0	0	0	0	0	0	0	0	0	0	1
Li	none	none	Pr2O3	78.385	0.67	0.33	0	2	17.6	3_Literature	0	0	0	0	0	0	0	0	0	0	0	0	0	0	0	0	0	0	0	0	0	0	0	0	0	0	0	0	0	0	0	0	0	0	0	0	0	1	0
Li	Na	none	Pr2O3	75.785	0.67	0.33	0	2	18.5	3_Literature	0	0	0	0	0	0	0	0	0	0	0	0	0	0	0	0	0	0	0	0	0	0	0	0	0	0	0	0	0	0	0	0	0	0	0	0	0	1	0
Ca	none	none	ZnO	77.585	0.75	0.25	0	3	9.8	3_Literature	0	0	0	0	0	0	0	0	0	0	0	0	1	0	0	0	0	0	0	0	0	0	0	0	0	0	0	0	0	0	0	0	0	0	0	0	0	0	0
Na	Mn	none	MgO	82.485	0.5	0.1	0.4	4.8	18.8	3_Literature	0	0	0	0	0	0	0	0	0	0	0	0	0	0	0	0	0	0	0	0	0	0	0	0	0	0	0	0	0	0	0	0	0	0	0	0	0	0	0
none	W	none	Na2O	84.985	0.9	0.1	0	9	2.4	3_Literature	0	0	0	0	0	0	0	0	0	0	0	0	0	0	0	0	0	0	0	0	0	0	0	0	0	0	0	0	0	0	0	0	0	0	0	0	0	0	0
none	Mo	none	Na2O	84.985	0.9	0.1	0	9	1.4	3_Literature	0	0	0	0	0	0	0	0	0	0	0	0	0	0	0	0	0	0	0	0	0	0	0	0	0	0	0	0	0	0	0	0	0	0	0	0	0	0	0
W	Mo	Co	SiO2	54.985	0.18	0.03	0.8	6	1.1	3_Literature	0	0	0	0	0	0	0	0	0	0	0	0	0	0	0	0	0	1	0	0	0	0	0	0	0	0	0	0	0	0	0	0	0	0	0	0	0	0	0
Mo	W	Co	SiO2	54.985	0.17	0.04	0.8	4.3	3.5	3_Literature	0	0	0	0	0	0	0	0	0	0	0	0	0	0	0	0	0	1	0	0	0	0	0	0	0	0	0	0	0	0	0	0	0	0	0	0	0	0	0
Mo	W	Co	SiO2	54.985	0.08	0.01	0.9	8	1.7	3_Literature	0	0	0	0	0	0	0	0	0	0	0	0	0	0	0	0	0	1	0	0	0	0	0	0	0	0	0	0	0	0	0	0	0	0	0	0	0	0	0
Mo	W	V	SiO2	54.985	0.49	0.1	0.4	4.7	3.3	3_Literature	0	0	0	0	0	0	0	0	0	0	0	0	0	0	0	0	0	0	0	0	0	0	0	0	0	0	0	0	0	0	0	0	0	0	0	0	0	0	0
Li	Ce	none	MgO	69.985	0.22	0.11	0.7	2	22.8	3_Literature	0	0	0	0	0	0	0	0	0	0	0	0	0	0	0	1	0	0	0	0	0	0	0	0	0	0	0	0	0	0	0	0	0	0	0	0	0	1	0
Na	Mn	none	MgO	92.485	0.5	0.1	0.4	5	15.4	3_Literature	0	0	0	0	0	0	0	0	0	0	0	0	0	0	0	0	0	0	0	0	0	0	0	0	0	0	0	0	0	0	0	0	0	0	0	0	0	0	0
Pb	none	none	MgO	79.985	0.69	0.1	0.2	6.7	12.5	3_Literature	0	0	0	0	0	0	0	0	0	0	0	0	0	0	0	0	0	0	0	0	0	0	0	0	0	0	0	0	0	0	0	0	0	0	0	0	0	0	0
La	none	none	SrO	74.985	0.3	0.05	0.7	6	13.4	3_Literature	0	0	0	0	0	0	0	0	0	0	0	0	0	0	0	0	0	0	0	0	0	0	0	0	0	0	0	0	0	0	0	0	0	0	0	1	0	0	0
Li	none	none	MgO	84.985	0.3	0.05	0.6	6	14.1	3_Literature	0	0	0	0	0	0	0	0	0	0	0	0	0	0	0	0	0	0	0	0	0	0	0	0	0	0	0	0	0	0	0	0	0	0	0	0	0	1	0
Ag	none	none	La2O3	79.985	0.3	0.05	0.7	6	12	3_Literature	1	0	0	0	0	0	0	0	0	0	0	0	0	0	0	0	0	0	0	0	0	0	0	0	0	0	0	0	0	0	0	0	0	0	0	0	1	0	0
Ca	none	none	La2O3	74.985	0.3	0.05	0.7	6	11.4	3_Literature	0	0	0	0	0	0	0	0	0	0	0	0	1	0	0	0	0	0	0	0	0	0	0	0	0	0	0	0	0	0	0	0	0	0	0	0	1	0	0
Zn	none	none	Fe2O3	82.985	0.42	0.08	0.5	5	13	3_Literature	0	0	0	0	0	0	0	0	0	0	0	0	0	0	0	0	0	0	0	0	0	0	0	0	0	0	0	1	0	0	0	0	0	0	0	0	0	0	0
Li	none	none	ZnO	74.985	0.08	0.04	0.9	2	15.1	3_Literature	0	0	0	0	0	0	0	0	0	0	0	0	0	0	0	0	0	0	0	0	0	0	0	0	0	0	0	0	0	0	0	0	0	0	0	0	0	1	0
Na	none	none	CaO	67.485	0.4	0.03	0.6	14.6	6.4	3_Literature	0	0	0	0	0	0	0	0	0	0	0	0	0	1	0	0	0	0	0	0	0	0	0	0	0	0	0	0	0	0	0	0	0	0	0	0	0	0	0
Na	none	none	Pb2O3	89.985	0.5	0.1	0.4	5	14.1	3_Literature	0	0	0	0	0	0	0	0	0	0	0	0	0	0	0	0	0	0	0	0	0	0	0	0	0	0	0	0	0	0	0	0	0	0	0	0	0	0	0
none	Ti	none	Li2O	74.985	0.32	0.08	0.6	4	6.7	3_Literature	0	0	0	0	0	0	0	0	0	0	0	0	0	0	0	0	0	0	0	0	0	0	0	0	0	0	0	0	0	0	0	0	0	0	0	0	0	0	1
Ni	Ti	none	Li2O	74.985	0.32	0.08	0.6	4	13.3	3_Literature	0	0	0	0	0	0	0	0	0	0	0	0	0	0	0	0	0	0	0	0	0	0	0	0	0	0	0	0	0	0	0	0	0	0	0	0	0	0	1
Ce	Li	none	MgO	69.985	0.22	0.11	0.7	2	20.2	3_Literature	0	0	0	0	0	0	0	0	0	0	0	0	0	0	0	1	0	0	0	0	0	0	0	0	0	0	0	0	0	0	0	0	0	0	0	0	0	1	0
Ce	Li	none	CaO	69.985	0.22	0.11	0.7	2	21.2	3_Literature	0	0	0	0	0	0	0	0	0	0	0	0	0	1	0	1	0	0	0	0	0	0	0	0	0	0	0	0	0	0	0	0	0	0	0	0	0	1	0
Ce	Li	none	SrO	69.985	0.22	0.11	0.7	2	12.3	3_Literature	0	0	0	0	0	0	0	0	0	0	0	0	0	0	0	1	0	0	0	0	0	0	0	0	0	0	0	0	0	0	0	0	0	0	0	0	0	1	0
Ce	Li	none	BaO	69.985	0.22	0.11	0.7	2	12.8	3_Literature	0	0	0	0	0	0	0	1	0	0	0	0	0	0	0	1	0	0	0	0	0	0	0	0	0	0	0	0	0	0	0	0	0	0	0	0	0	1	0
Zn	Li	none	MgO	79.985	0.28	0.13	0.6	2.1	11.7	3_Literature	0	0	0	0	0	0	0	0	0	0	0	0	0	0	0	0	0	0	0	0	0	0	0	0	0	0	0	0	0	0	0	0	0	0	0	0	0	1	0
Li	none	none	MgO	79.985	0.28	0.13	0.6	2.1	13.4	3_Literature	0	0	0	0	0	0	0	0	0	0	0	0	0	0	0	0	0	0	0	0	0	0	0	0	0	0	0	0	0	0	0	0	0	0	0	0	0	1	0
Co	Li	none	MgO	79.985	0.28	0.13	0.6	2.1	21.3	3_Literature	0	0	0	0	0	0	0	0	0	0	0	0	0	0	0	0	0	1	0	0	0	0	0	0	0	0	0	0	0	0	0	0	0	0	0	0	0	1	0
Fe	Li	none	MgO	79.985	0.28	0.13	0.6	2.1	21.9	3_Literature	0	0	0	0	0	0	0	0	0	0	0	0	0	0	0	0	0	0	0	0	0	0	0	0	0	0	1	0	0	0	0	0	0	0	0	0	0	1	0
Mn	Li	none	MgO	79.985	0.28	0.13	0.6	2.1	20.8	3_Literature	0	0	0	0	0	0	0	0	0	0	0	0	0	0	0	0	0	0	0	0	0	0	0	0	0	0	0	0	0	0	0	0	0	0	0	0	0	1	0
Li	none	none	MgO	77.985	0.67	0.07	0.3	9.6	9.5	3_Literature	0	0	0	0	0	0	0	0	0	0	0	0	0	0	0	0	0	0	0	0	0	0	0	0	0	0	0	0	0	0	0	0	0	0	0	0	0	1	0
Pb	none	none	Al2O3	79.985	0.14	0.02	0.9	8.9	9.1	3_Literature	0	0	1	0	0	0	0	0	0	0	0	0	0	0	0	0	0	0	0	0	0	0	0	0	0	0	0	0	0	0	0	0	0	0	0	0	0	0	0
Na	none	none	CaO	73.985	0.7	0.08	0.2	9.3	12.2	3_Literature	0	0	0	0	0	0	0	0	0	0	0	0	0	1	0	0	0	0	0	0	0	0	0	0	0	0	0	0	0	0	0	0	0	0	0	0	0	0	0
none	none	none	BaO	73.985	0.67	0.08	0.3	8	8.8	3_Literature	0	0	0	0	0	0	0	1	0	0	0	0	0	0	0	0	0	0	0	0	0	0	0	0	0	0	0	0	0	0	0	0	0	0	0	0	0	0	0
Li	none	none	MgO	69.985	0.28	0.16	0.6	1.8	14.8	3_Literature	0	0	0	0	0	0	0	0	0	0	0	0	0	0	0	0	0	0	0	0	0	0	0	0	0	0	0	0	0	0	0	0	0	0	0	0	0	1	0
Li	Ce	none	MgO	69.985	0.22	0.11	0.7	2	20.3	3_Literature	0	0	0	0	0	0	0	0	0	0	0	0	0	0	0	1	0	0	0	0	0	0	0	0	0	0	0	0	0	0	0	0	0	0	0	0	0	1	0
Li	Ce	none	CaO	69.985	0.22	0.11	0.7	2	20.1	3_Literature	0	0	0	0	0	0	0	0	0	0	0	0	0	1	0	1	0	0	0	0	0	0	0	0	0	0	0	0	0	0	0	0	0	0	0	0	0	1	0
Li	Ce	none	SrO	69.985	0.22	0.11	0.7	2	12.5	3_Literature	0	0	0	0	0	0	0	0	0	0	0	0	0	0	0	1	0	0	0	0	0	0	0	0	0	0	0	0	0	0	0	0	0	0	0	0	0	1	0
Li	Ce	none	BaO	69.985	0.22	0.11	0.7	2	13.1	3_Literature	0	0	0	0	0	0	0	1	0	0	0	0	0	0	0	1	0	0	0	0	0	0	0	0	0	0	0	0	0	0	0	0	0	0	0	0	0	1	0
Na	none	none	CaO	73.985	0.66	0.08	0.3	8.3	14	3_Literature	0	0	0	0	0	0	0	0	0	0	0	0	0	1	0	0	0	0	0	0	0	0	0	0	0	0	0	0	0	0	0	0	0	0	0	0	0	0	0
Na	none	none	CaO	73.985	0.35	0.14	0.5	2.5	17	3_Literature	0	0	0	0	0	0	0	0	0	0	0	0	0	1	0	0	0	0	0	0	0	0	0	0	0	0	0	0	0	0	0	0	0	0	0	0	0	0	0
Li	none	none	ZnO	70.685	0.5	0.06	0.5	8.3	8.5	3_Literature	0	0	0	0	0	0	0	0	0	0	0	0	0	0	0	0	0	0	0	0	0	0	0	0	0	0	0	0	0	0	0	0	0	0	0	0	0	1	0
Na	none	none	La2O3	79.985	0.3	0.05	0.7	6	21.1	3_Literature	0	0	0	0	0	0	0	0	0	0	0	0	0	0	0	0	0	0	0	0	0	0	0	0	0	0	0	0	0	0	0	0	0	0	0	0	1	0	0
K	none	none	La2O3	79.985	0.3	0.05	0.7	6	18	3_Literature	0	0	0	0	0	0	0	0	0	0	0	0	0	0	0	0	0	0	0	0	0	0	0	0	0	0	0	0	0	0	0	0	0	1	0	0	1	0	0
Mg	none	none	La2O3	74.985	0.3	0.05	0.7	6	12.6	3_Literature	0	0	0	0	0	0	0	0	0	0	0	0	0	0	0	0	0	0	0	0	0	0	0	0	0	0	0	0	0	0	0	0	0	0	0	0	1	0	0
Ba	none	none	La2O3	79.985	0.3	0.05	0.7	6	13	3_Literature	0	0	0	0	0	0	1	0	0	0	0	0	0	0	0	0	0	0	0	0	0	0	0	0	0	0	0	0	0	0	0	0	0	0	0	0	1	0	0
Bi	none	none	La2O3	74.985	0.3	0.05	0.7	6	11.2	3_Literature	0	0	0	0	0	0	0	0	0	0	1	0	0	0	0	0	0	0	0	0	0	0	0	0	0	0	0	0	0	0	0	0	0	0	0	0	1	0	0
Li	none	none	MgO	69.985	0.76	0.25	0	3	21.4	3_Literature	0	0	0	0	0	0	0	0	0	0	0	0	0	0	0	0	0	0	0	0	0	0	0	0	0	0	0	0	0	0	0	0	0	0	0	0	0	1	0
Li	Sb	none	SiO2	77.985	0.51	0.11	0.4	4.5	1.4	3_Literature	0	0	0	0	0	0	0	0	0	0	0	0	0	0	0	0	0	0	0	0	0	0	0	0	0	0	0	0	0	0	0	0	0	0	0	0	0	1	0
Ti	Li	none	SiO2	77.385	0.14	0.05	0.8	3	11.3	3_Literature	0	0	0	0	0	0	0	0	0	0	0	0	0	0	0	0	0	0	0	0	0	0	0	0	0	0	0	0	0	0	0	0	0	0	0	0	0	1	0
Sn	Li	none	MgO	67.985	0.67	0.07	0.3	9.6	12	3_Literature	0	0	0	0	0	0	0	0	0	0	0	0	0	0	0	0	0	0	0	0	0	0	0	0	0	0	0	0	0	0	0	0	0	0	0	0	0	1	0
Li	Zn	none	MgO	77.985	0.17	0.07	0.8	2.3	19.7	3_Literature	0	0	0	0	0	0	0	0	0	0	0	0	0	0	0	0	0	0	0	0	0	0	0	0	0	0	0	0	0	0	0	0	0	0	0	0	0	1	0
La	none	none	CaO	79.985	0.81	0.2	0	4	15.2	3_Literature	0	0	0	0	0	0	0	0	0	0	0	0	0	1	0	0	0	0	0	0	0	0	0	0	0	0	0	0	0	0	0	0	0	0	0	1	0	0	0
none	none	none	BaO	79.985	0.14	0.06	0.8	2.3	14.7	3_Literature	0	0	0	0	0	0	0	1	0	0	0	0	0	0	0	0	0	0	0	0	0	0	0	0	0	0	0	0	0	0	0	0	0	0	0	0	0	0	0
La	none	none	BaO	79.985	0.14	0.06	0.8	2.3	18.3	3_Literature	0	0	0	0	0	0	0	1	0	0	0	0	0	0	0	0	0	0	0	0	0	0	0	0	0	0	0	0	0	0	0	0	0	0	0	1	0	0	0
none	none	none	BaO	79.985	0.14	0.06	0.8	2.3	14.9	3_Literature	0	0	0	0	0	0	0	1	0	0	0	0	0	0	0	0	0	0	0	0	0	0	0	0	0	0	0	0	0	0	0	0	0	0	0	0	0	0	0
Na	none	none	ZrO2	74.985	0.4	0.13	0.5	3.1	10.7	3_Literature	0	0	0	0	0	0	0	0	0	0	0	0	0	0	0	0	0	0	0	0	0	0	0	0	0	0	0	0	0	0	0	0	0	0	0	0	0	0	0
La	none	none	MgO	79.985	0.81	0.2	0	4	15.3	3_Literature	0	0	0	0	0	0	0	0	0	0	0	0	0	0	0	0	0	0	0	0	0	0	0	0	0	0	0	0	0	0	0	0	0	0	0	1	0	0	0
La	none	none	MgO	74.985	0.81	0.2	0	4	20.4	3_Literature	0	0	0	0	0	0	0	0	0	0	0	0	0	0	0	0	0	0	0	0	0	0	0	0	0	0	0	0	0	0	0	0	0	0	0	1	0	0	0
none	none	none	Sm2O3	57.285	0.71	0.29	0	2.5	7.2	3_Literature	0	0	0	0	0	0	0	0	0	0	0	0	0	0	0	0	0	0	0	0	0	0	0	0	0	0	0	0	0	0	0	0	0	0	0	0	0	0	0
Ba	La	none	MgO	79.985	0.81	0.2	0	4	17	3_Literature	0	0	0	0	0	0	1	0	0	0	0	0	0	0	0	0	0	0	0	0	0	0	0	0	0	0	0	0	0	0	0	0	0	0	0	1	0	0	0
Ti	La	none	Li2O	74.985	0.32	0.08	0.6	4	14.3	3_Literature	0	0	0	0	0	0	0	0	0	0	0	0	0	0	0	0	0	0	0	0	0	0	0	0	0	0	0	0	0	0	0	0	0	0	0	1	0	0	1
Li	none	none	CaO	73.985	0.67	0.07	0.3	9.1	10.9	3_Literature	0	0	0	0	0	0	0	0	0	0	0	0	0	1	0	0	0	0	0	0	0	0	0	0	0	0	0	0	0	0	0	0	0	0	0	0	0	1	0
K	none	none	CaO	73.985	0.67	0.07	0.3	9.1	9.9	3_Literature	0	0	0	0	0	0	0	0	0	0	0	0	0	1	0	0	0	0	0	0	0	0	0	0	0	0	0	0	0	0	0	0	0	1	0	0	0	0	0
Na	none	none	CaO	73.985	0.67	0.07	0.3	9	9.4	3_Literature	0	0	0	0	0	0	0	0	0	0	0	0	0	1	0	0	0	0	0	0	0	0	0	0	0	0	0	0	0	0	0	0	0	0	0	0	0	0	0
Sr	none	none	SrO	73.985	0.67	0.08	0.3	8	7.7	3_Literature	0	0	0	0	0	0	0	0	0	0	0	0	0	0	0	0	0	0	0	0	0	0	0	0	0	0	0	0	0	0	0	0	0	0	0	0	0	0	0
Pb	none	none	Al2O3	74.385	0.5	0.05	0.5	10.1	2.2	3_Literature	0	0	1	0	0	0	0	0	0	0	0	0	0	0	0	0	0	0	0	0	0	0	0	0	0	0	0	0	0	0	0	0	0	0	0	0	0	0	0
Mn	none	none	Li2O	77.985	0.33	0.17	0.5	2	16	3_Literature	0	0	0	0	0	0	0	0	0	0	0	0	0	0	0	0	0	0	0	0	0	0	0	0	0	0	0	0	0	0	0	0	0	0	0	0	0	0	1
Fe	none	none	Li2O	79.985	0.33	0.17	0.5	2	22	3_Literature	0	0	0	0	0	0	0	0	0	0	0	0	0	0	0	0	0	0	0	0	0	0	0	0	0	0	1	0	0	0	0	0	0	0	0	0	0	0	1
In	none	none	Li2O	77.985	0.33	0.17	0.5	2	20	3_Literature	0	0	0	0	0	0	0	0	0	0	0	0	0	0	0	0	0	0	0	0	0	0	0	0	0	0	0	0	0	0	0	0	1	0	0	0	0	0	1
Ni	none	none	Li2O	75.985	0.33	0.17	0.5	2	23.8	3_Literature	0	0	0	0	0	0	0	0	0	0	0	0	0	0	0	0	0	0	0	0	0	0	0	0	0	0	0	0	0	0	0	0	0	0	0	0	0	0	1
Ti	none	none	Li2O	77.985	0.33	0.17	0.5	2	18.6	3_Literature	0	0	0	0	0	0	0	0	0	0	0	0	0	0	0	0	0	0	0	0	0	0	0	0	0	0	0	0	0	0	0	0	0	0	0	0	0	0	1
Ge	none	none	Li2O	83.985	0.33	0.17	0.5	2	16	3_Literature	0	0	0	0	0	0	0	0	0	0	0	0	0	0	0	0	0	0	0	0	0	0	0	0	0	0	0	0	0	0	1	0	0	0	0	0	0	0	1
Sr	none	none	Li2O	79.985	0.33	0.17	0.5	2	20.4	3_Literature	0	0	0	0	0	0	0	0	0	0	0	0	0	0	0	0	0	0	0	0	0	0	0	0	0	0	0	0	0	0	0	0	0	0	0	0	0	0	1
Sn	none	none	Li2O	77.985	0.33	0.17	0.5	2	18.3	3_Literature	0	0	0	0	0	0	0	0	0	0	0	0	0	0	0	0	0	0	0	0	0	0	0	0	0	0	0	0	0	0	0	0	0	0	0	0	0	0	1
La	none	none	BaO	74.985	0.5	0.1	0.4	5	14.9	3_Literature	0	0	0	0	0	0	0	1	0	0	0	0	0	0	0	0	0	0	0	0	0	0	0	0	0	0	0	0	0	0	0	0	0	0	0	1	0	0	0
Li	none	none	MgO	69.985	0.67	0.33	0	2	19	3_Literature	0	0	0	0	0	0	0	0	0	0	0	0	0	0	0	0	0	0	0	0	0	0	0	0	0	0	0	0	0	0	0	0	0	0	0	0	0	1	0
Li	Zn	none	MgO	69.985	0.67	0.33	0	2	17.5	3_Literature	0	0	0	0	0	0	0	0	0	0	0	0	0	0	0	0	0	0	0	0	0	0	0	0	0	0	0	0	0	0	0	0	0	0	0	0	0	1	0
Li	Ni	none	MgO	69.985	0.67	0.33	0	2	15.6	3_Literature	0	0	0	0	0	0	0	0	0	0	0	0	0	0	0	0	0	0	0	0	0	0	0	0	0	0	0	0	0	0	0	0	0	0	0	0	0	1	0
Li	Sm	none	MgO	69.985	0.67	0.33	0	2	18.4	3_Literature	0	0	0	0	0	0	0	0	0	0	0	0	0	0	0	0	0	0	0	0	0	0	0	0	0	0	0	0	0	0	0	0	0	0	0	0	0	1	0
Li	Ce	none	MgO	69.985	0.67	0.33	0	2	20.2	3_Literature	0	0	0	0	0	0	0	0	0	0	0	0	0	0	0	1	0	0	0	0	0	0	0	0	0	0	0	0	0	0	0	0	0	0	0	0	0	1	0
Li	none	none	MgO	70.185	0.87	0.03	0.1	29	3.2	3_Literature	0	0	0	0	0	0	0	0	0	0	0	0	0	0	0	0	0	0	0	0	0	0	0	0	0	0	0	0	0	0	0	0	0	0	0	0	0	1	0
Li	Al	none	MgO	80.185	0.6	0.08	0.3	7.1	7.8	3_Literature	0	1	0	0	0	0	0	0	0	0	0	0	0	0	0	0	0	0	0	0	0	0	0	0	0	0	0	0	0	0	0	0	0	0	0	0	0	1	0
Li	Y	none	MgO	79.885	0.6	0.08	0.3	7.1	13.6	3_Literature	0	0	0	0	0	0	0	0	0	0	0	0	0	0	0	0	0	0	0	0	0	0	0	0	0	0	0	0	0	0	0	0	0	0	0	0	0	1	0
Li	La	none	MgO	79.885	0.6	0.08	0.3	7.1	13.3	3_Literature	0	0	0	0	0	0	0	0	0	0	0	0	0	0	0	0	0	0	0	0	0	0	0	0	0	0	0	0	0	0	0	0	0	0	0	1	0	1	0
Li	La	none	MgO	79.885	0.6	0.08	0.3	7.1	11.4	3_Literature	0	0	0	0	0	0	0	0	0	0	0	0	0	0	0	0	0	0	0	0	0	0	0	0	0	0	0	0	0	0	0	0	0	0	0	1	0	1	0
Sr	none	none	Li2O	91.585	0.7	0.1	0.2	7	1.3	3_Literature	0	0	0	0	0	0	0	0	0	0	0	0	0	0	0	0	0	0	0	0	0	0	0	0	0	0	0	0	0	0	0	0	0	0	0	0	0	0	1
Pb	none	none	SiO2	91.685	0.83	0.16	0	5.2	9.4	3_Literature	0	0	0	0	0	0	0	0	0	0	0	0	0	0	0	0	0	0	0	0	0	0	0	0	0	0	0	0	0	0	0	0	0	0	0	0	0	0	0
none	none	none	SiO2	79.985	0.96	0.04	0	24	1.9	3_Literature	0	0	0	0	0	0	0	0	0	0	0	0	0	0	0	0	0	0	0	0	0	0	0	0	0	0	0	0	0	0	0	0	0	0	0	0	0	0	0
Pb	none	none	SiO2	83.685	0.87	0.03	0.1	30.9	6.6	3_Literature	0	0	0	0	0	0	0	0	0	0	0	0	0	0	0	0	0	0	0	0	0	0	0	0	0	0	0	0	0	0	0	0	0	0	0	0	0	0	0
Li	Al	none	MgO	79.985	0.6	0.08	0.3	7.1	7.8	3_Literature	0	1	0	0	0	0	0	0	0	0	0	0	0	0	0	0	0	0	0	0	0	0	0	0	0	0	0	0	0	0	0	0	0	0	0	0	0	1	0
Li	Cs	none	ZnO	73.985	0.27	0.06	0.7	4.7	16.8	3_Literature	0	0	0	0	0	0	0	0	0	0	0	0	0	0	0	0	0	0	0	1	0	0	0	0	0	0	0	0	0	0	0	0	0	0	0	0	0	1	0
Li	none	none	MgO	79.985	0.67	0.07	0.3	9.6	13.7	3_Literature	0	0	0	0	0	0	0	0	0	0	0	0	0	0	0	0	0	0	0	0	0	0	0	0	0	0	0	0	0	0	0	0	0	0	0	0	0	1	0
Sr	none	none	La2O3	87.985	0.88	0.13	0	6.7	15.5	3_Literature	0	0	0	0	0	0	0	0	0	0	0	0	0	0	0	0	0	0	0	0	0	0	0	0	0	0	0	0	0	0	0	0	0	0	0	0	1	0	0
Y	none	none	CaO	74.985	0.15	0.08	0.8	2	12.9	3_Literature	0	0	0	0	0	0	0	0	0	0	0	0	0	1	0	0	0	0	0	0	0	0	0	0	0	0	0	0	0	0	0	0	0	0	0	0	0	0	0
none	none	none	CaO	79.985	0.09	0.05	0.9	2	8	3_Literature	0	0	0	0	0	0	0	0	0	0	0	0	0	1	0	0	0	0	0	0	0	0	0	0	0	0	0	0	0	0	0	0	0	0	0	0	0	0	0
none	none	none	SrO	79.985	0.09	0.05	0.9	2	11.5	3_Literature	0	0	0	0	0	0	0	0	0	0	0	0	0	0	0	0	0	0	0	0	0	0	0	0	0	0	0	0	0	0	0	0	0	0	0	0	0	0	0
Sm	none	none	MgO	79.985	0.09	0.05	0.9	2	14	3_Literature	0	0	0	0	0	0	0	0	0	0	0	0	0	0	0	0	0	0	0	0	0	0	0	0	0	0	0	0	0	0	0	0	0	0	0	0	0	0	0
Ca	none	none	BaO	79.985	0.67	0.07	0.3	9.6	0.5	3_Literature	0	0	0	0	0	0	0	1	0	0	0	0	1	0	0	0	0	0	0	0	0	0	0	0	0	0	0	0	0	0	0	0	0	0	0	0	0	0	0
Co	none	none	MgO	74.985	0.03	0.02	1	1.9	11.7	3_Literature	0	0	0	0	0	0	0	0	0	0	0	0	0	0	0	0	0	1	0	0	0	0	0	0	0	0	0	0	0	0	0	0	0	0	0	0	0	0	0
Mn	none	none	MgO	74.985	0.03	0.02	1	1.9	16.1	3_Literature	0	0	0	0	0	0	0	0	0	0	0	0	0	0	0	0	0	0	0	0	0	0	0	0	0	0	0	0	0	0	0	0	0	0	0	0	0	0	0
Li	none	none	MgO	74.985	0.03	0.02	1	1.9	28.9	3_Literature	0	0	0	0	0	0	0	0	0	0	0	0	0	0	0	0	0	0	0	0	0	0	0	0	0	0	0	0	0	0	0	0	0	0	0	0	0	1	0
none	none	none	ZnO	69.985	0.44	0.11	0.5	4	4.1	3_Literature	0	0	0	0	0	0	0	0	0	0	0	0	0	0	0	0	0	0	0	0	0	0	0	0	0	0	0	0	0	0	0	0	0	0	0	0	0	0	0
Li	Cd	none	MgO	77.985	0.17	0.07	0.8	2.3	14.2	3_Literature	0	0	0	0	0	0	0	0	0	0	0	0	0	0	1	0	0	0	0	0	0	0	0	0	0	0	0	0	0	0	0	0	0	0	0	0	0	1	0
La	none	none	BaO	79.985	0.14	0.06	0.8	2.3	18.3	3_Literature	0	0	0	0	0	0	0	1	0	0	0	0	0	0	0	0	0	0	0	0	0	0	0	0	0	0	0	0	0	0	0	0	0	0	0	1	0	0	0
none	none	none	BaO	79.985	0.17	0.05	0.8	3	7.5	3_Literature	0	0	0	0	0	0	0	1	0	0	0	0	0	0	0	0	0	0	0	0	0	0	0	0	0	0	0	0	0	0	0	0	0	0	0	0	0	0	0
none	none	none	BaO	79.985	0.14	0.06	0.8	2.3	14.9	3_Literature	0	0	0	0	0	0	0	1	0	0	0	0	0	0	0	0	0	0	0	0	0	0	0	0	0	0	0	0	0	0	0	0	0	0	0	0	0	0	0
none	none	none	BaO	73.985	0.7	0.08	0.2	9.3	9.8	3_Literature	0	0	0	0	0	0	0	1	0	0	0	0	0	0	0	0	0	0	0	0	0	0	0	0	0	0	0	0	0	0	0	0	0	0	0	0	0	0	0
none	none	none	La2O3	87.985	0.91	0.09	0	10	6.6	3_Literature	0	0	0	0	0	0	0	0	0	0	0	0	0	0	0	0	0	0	0	0	0	0	0	0	0	0	0	0	0	0	0	0	0	0	0	0	1	0	0
none	none	none	ThO2	87.985	0.91	0.09	0	10	5.5	3_Literature	0	0	0	0	0	0	0	0	0	0	0	0	0	0	0	0	0	0	0	0	0	0	0	0	0	0	0	0	0	0	0	0	0	0	0	0	0	0	0
La	Sr	none	ThO2	87.985	0.91	0.09	0	10	11.3	3_Literature	0	0	0	0	0	0	0	0	0	0	0	0	0	0	0	0	0	0	0	0	0	0	0	0	0	0	0	0	0	0	0	0	0	0	0	1	0	0	0
La	none	none	ThO2	87.985	0.91	0.09	0	10	9.4	3_Literature	0	0	0	0	0	0	0	0	0	0	0	0	0	0	0	0	0	0	0	0	0	0	0	0	0	0	0	0	0	0	0	0	0	0	0	1	0	0	0
Th	none	none	La2O3	87.985	0.91	0.09	0	10	9.6	3_Literature	0	0	0	0	0	0	0	0	0	0	0	0	0	0	0	0	0	0	0	0	0	0	0	0	0	0	0	0	0	0	0	0	0	0	0	0	1	0	0
Ce	none	none	Na2O	69.685	0.18	0.03	0.8	6.1	9.3	3_Literature	0	0	0	0	0	0	0	0	0	0	0	0	0	0	0	1	0	0	0	0	0	0	0	0	0	0	0	0	0	0	0	0	0	0	0	0	0	0	0
Na	none	none	MgO	79.985	0.03	0.01	1	2	22.4	3_Literature	0	0	0	0	0	0	0	0	0	0	0	0	0	0	0	0	0	0	0	0	0	0	0	0	0	0	0	0	0	0	0	0	0	0	0	0	0	0	0
none	none	none	Y2O3	79.985	0.3	0.05	0.7	6	10.1	3_Literature	0	0	0	0	0	0	0	0	0	0	0	0	0	0	0	0	0	0	0	0	0	0	0	0	0	0	0	0	0	0	0	0	0	0	0	0	0	0	0
none	none	none	La2O3	72.485	0.18	0.02	0.8	8.8	4.4	3_Literature	0	0	0	0	0	0	0	0	0	0	0	0	0	0	0	0	0	0	0	0	0	0	0	0	0	0	0	0	0	0	0	0	0	0	0	0	1	0	0
none	none	none	Nd2O3	74.985	0.3	0.05	0.7	6	9.7	3_Literature	0	0	0	0	0	0	0	0	0	0	0	0	0	0	0	0	0	0	0	0	0	0	0	0	0	0	0	0	0	0	0	0	0	0	0	0	0	0	0
none	none	none	Eu2O3	69.985	0.3	0.05	0.7	6	10.2	3_Literature	0	0	0	0	0	0	0	0	0	0	0	0	0	0	0	0	0	0	0	0	0	0	0	0	0	1	0	0	0	0	0	0	0	0	0	0	0	0	0
none	none	none	Gd2O3	79.985	0.3	0.05	0.7	6	11.7	3_Literature	0	0	0	0	0	0	0	0	0	0	0	0	0	0	0	0	0	0	0	0	0	0	0	0	0	0	0	0	0	1	0	0	0	0	0	0	0	0	0
Na	none	none	La2O3	79.985	0.3	0.05	0.7	6	13.8	3_Literature	0	0	0	0	0	0	0	0	0	0	0	0	0	0	0	0	0	0	0	0	0	0	0	0	0	0	0	0	0	0	0	0	0	0	0	0	1	0	0
K	none	none	BaO	79.985	0.03	0.01	1	2	20.2	3_Literature	0	0	0	0	0	0	0	1	0	0	0	0	0	0	0	0	0	0	0	0	0	0	0	0	0	0	0	0	0	0	0	0	0	1	0	0	0	0	0
Ca	none	none	MgO	74.985	0.13	0.01	0.9	9.4	12.1	3_Literature	0	0	0	0	0	0	0	0	0	0	0	0	1	0	0	0	0	0	0	0	0	0	0	0	0	0	0	0	0	0	0	0	0	0	0	0	0	0	0
Pb	none	none	MgO	79.985	0.8	0.2	0	4	16.3	3_Literature	0	0	0	0	0	0	0	0	0	0	0	0	0	0	0	0	0	0	0	0	0	0	0	0	0	0	0	0	0	0	0	0	0	0	0	0	0	0	0
La	none	none	MgO	79.985	0.8	0.2	0	4	17.6	3_Literature	0	0	0	0	0	0	0	0	0	0	0	0	0	0	0	0	0	0	0	0	0	0	0	0	0	0	0	0	0	0	0	0	0	0	0	1	0	0	0
K	Ni	none	CaO	59.985	0.29	0.09	0.6	3	8.6	3_Literature	0	0	0	0	0	0	0	0	0	0	0	0	0	1	0	0	0	0	0	0	0	0	0	0	0	0	0	0	0	0	0	0	0	1	0	0	0	0	0
Li	none	none	CaO	74.985	0.03	0.01	1	1.9	22.3	3_Literature	0	0	0	0	0	0	0	0	0	0	0	0	0	1	0	0	0	0	0	0	0	0	0	0	0	0	0	0	0	0	0	0	0	0	0	0	0	1	0
Li	Ba	none	CaO	74.985	0.03	0.01	1	1.9	23.5	3_Literature	0	0	0	0	0	0	1	0	0	0	0	0	0	1	0	0	0	0	0	0	0	0	0	0	0	0	0	0	0	0	0	0	0	0	0	0	0	1	0
La	none	none	Na2O	74.985	0.4	0.08	0.5	5	18.7	3_Literature	0	0	0	0	0	0	0	0	0	0	0	0	0	0	0	0	0	0	0	0	0	0	0	0	0	0	0	0	0	0	0	0	0	0	0	1	0	0	0
none	Ti	none	Li2O	74.985	0.32	0.08	0.6	4	7.3	3_Literature	0	0	0	0	0	0	0	0	0	0	0	0	0	0	0	0	0	0	0	0	0	0	0	0	0	0	0	0	0	0	0	0	0	0	0	0	0	0	1
none	Ni	Ti	Li2O	74.985	0.32	0.08	0.6	4	13.2	3_Literature	0	0	0	0	0	0	0	0	0	0	0	0	0	0	0	0	0	0	0	0	0	0	0	0	0	0	0	0	0	0	0	0	0	0	0	0	0	0	1
Ba	none	none	La2O3	79.985	0.15	0.08	0.8	1.9	13.7	3_Literature	0	0	0	0	0	0	1	0	0	0	0	0	0	0	0	0	0	0	0	0	0	0	0	0	0	0	0	0	0	0	0	0	0	0	0	0	1	0	0
Ba	none	none	La2O3	79.985	0.15	0.08	0.8	1.9	16.3	3_Literature	0	0	0	0	0	0	1	0	0	0	0	0	0	0	0	0	0	0	0	0	0	0	0	0	0	0	0	0	0	0	0	0	0	0	0	0	1	0	0
Ba	none	none	La2O3	79.985	0.15	0.08	0.8	1.9	11.8	3_Literature	0	0	0	0	0	0	1	0	0	0	0	0	0	0	0	0	0	0	0	0	0	0	0	0	0	0	0	0	0	0	0	0	0	0	0	0	1	0	0
La	none	none	La2O3	79.985	0.15	0.08	0.8	1.9	9.3	3_Literature	0	0	0	0	0	0	0	0	0	0	0	0	0	0	0	0	0	0	0	0	0	0	0	0	0	0	0	0	0	0	0	0	0	0	0	1	1	0	0
Ba	none	none	CaO	79.985	0.15	0.08	0.8	1.9	14.1	3_Literature	0	0	0	0	0	0	1	0	0	0	0	0	0	1	0	0	0	0	0	0	0	0	0	0	0	0	0	0	0	0	0	0	0	0	0	0	0	0	0
none	none	none	ZrO2	81.985	0.4	0.1	0.5	4	7.7	3_Literature	0	0	0	0	0	0	0	0	0	0	0	0	0	0	0	0	0	0	0	0	0	0	0	0	0	0	0	0	0	0	0	0	0	0	0	0	0	0	0
K	none	none	Mn2O	74.985	0.51	0.03	0.5	20.3	2.4	3_Literature	0	0	0	0	0	0	0	0	0	0	0	0	0	0	0	0	0	0	0	0	0	0	0	0	0	0	0	0	0	0	0	0	0	1	0	0	0	0	0
Mo	none	none	Na2O	72.885	0.54	0.47	0	1.1	7.2	3_Literature	0	0	0	0	0	0	0	0	0	0	0	0	0	0	0	0	0	0	0	0	0	0	0	0	0	0	0	0	0	0	0	0	0	0	0	0	0	0	0
La	none	none	CaO	73.985	0.93	0.07	0	13.3	9	3_Literature	0	0	0	0	0	0	0	0	0	0	0	0	0	1	0	0	0	0	0	0	0	0	0	0	0	0	0	0	0	0	0	0	0	0	0	1	0	0	0
Na	none	none	CaO	82.785	0.4	0.2	0.4	2	17.2	3_Literature	0	0	0	0	0	0	0	0	0	0	0	0	0	1	0	0	0	0	0	0	0	0	0	0	0	0	0	0	0	0	0	0	0	0	0	0	0	0	0
none	none	none	MgO	77.985	0.43	0.16	0.4	2.7	2.3	3_Literature	0	0	0	0	0	0	0	0	0	0	0	0	0	0	0	0	0	0	0	0	0	0	0	0	0	0	0	0	0	0	0	0	0	0	0	0	0	0	0
Sn	none	none	MgO	77.985	0.43	0.16	0.4	2.7	4.3	3_Literature	0	0	0	0	0	0	0	0	0	0	0	0	0	0	0	0	0	0	0	0	0	0	0	0	0	0	0	0	0	0	0	0	0	0	0	0	0	0	0
Sn	none	none	MgO	77.985	0.43	0.16	0.4	2.7	8	3_Literature	0	0	0	0	0	0	0	0	0	0	0	0	0	0	0	0	0	0	0	0	0	0	0	0	0	0	0	0	0	0	0	0	0	0	0	0	0	0	0
Sn	none	none	MgO	77.985	0.43	0.16	0.4	2.7	7.4	3_Literature	0	0	0	0	0	0	0	0	0	0	0	0	0	0	0	0	0	0	0	0	0	0	0	0	0	0	0	0	0	0	0	0	0	0	0	0	0	0	0
Sn	none	none	MgO	77.985	0.43	0.16	0.4	2.7	5.7	3_Literature	0	0	0	0	0	0	0	0	0	0	0	0	0	0	0	0	0	0	0	0	0	0	0	0	0	0	0	0	0	0	0	0	0	0	0	0	0	0	0
none	none	none	SnO	77.985	0.43	0.16	0.4	2.7	0.7	3_Literature	0	0	0	0	0	0	0	0	0	0	0	0	0	0	0	0	0	0	0	0	0	0	0	0	0	0	0	0	0	0	0	0	0	0	0	0	0	0	0
Pb	none	none	MgO	77.985	0.43	0.16	0.4	2.7	5.5	3_Literature	0	0	0	0	0	0	0	0	0	0	0	0	0	0	0	0	0	0	0	0	0	0	0	0	0	0	0	0	0	0	0	0	0	0	0	0	0	0	0
Pb	none	none	MgO	77.985	0.43	0.16	0.4	2.7	6.7	3_Literature	0	0	0	0	0	0	0	0	0	0	0	0	0	0	0	0	0	0	0	0	0	0	0	0	0	0	0	0	0	0	0	0	0	0	0	0	0	0	0
Pb	none	none	MgO	77.985	0.43	0.16	0.4	2.7	6.4	3_Literature	0	0	0	0	0	0	0	0	0	0	0	0	0	0	0	0	0	0	0	0	0	0	0	0	0	0	0	0	0	0	0	0	0	0	0	0	0	0	0
Pb	none	none	MgO	77.985	0.43	0.16	0.4	2.7	4.1	3_Literature	0	0	0	0	0	0	0	0	0	0	0	0	0	0	0	0	0	0	0	0	0	0	0	0	0	0	0	0	0	0	0	0	0	0	0	0	0	0	0
Pb	none	none	MgO	77.985	0.43	0.16	0.4	2.7	2.1	3_Literature	0	0	0	0	0	0	0	0	0	0	0	0	0	0	0	0	0	0	0	0	0	0	0	0	0	0	0	0	0	0	0	0	0	0	0	0	0	0	0
Pb	none	none	MgO	77.985	0.43	0.16	0.4	2.7	2.1	3_Literature	0	0	0	0	0	0	0	0	0	0	0	0	0	0	0	0	0	0	0	0	0	0	0	0	0	0	0	0	0	0	0	0	0	0	0	0	0	0	0
none	none	none	MgO	69.985	0.75	0.25	0	3	5.4	3_Literature	0	0	0	0	0	0	0	0	0	0	0	0	0	0	0	0	0	0	0	0	0	0	0	0	0	0	0	0	0	0	0	0	0	0	0	0	0	0	0
none	none	none	La2O3	77.485	0.5	0.09	0.4	5.5	11.6	3_Literature	0	0	0	0	0	0	0	0	0	0	0	0	0	0	0	0	0	0	0	0	0	0	0	0	0	0	0	0	0	0	0	0	0	0	0	0	1	0	0
none	none	none	CeO2	77.485	0.5	0.09	0.4	5.5	0.2	3_Literature	0	0	0	0	0	0	0	0	0	0	0	0	0	0	0	0	1	0	0	0	0	0	0	0	0	0	0	0	0	0	0	0	0	0	0	0	0	0	0
none	none	none	Yb2O3	77.485	0.5	0.09	0.4	5.5	8.1	3_Literature	0	0	0	0	0	0	0	0	0	0	0	0	0	0	0	0	0	0	0	0	0	0	0	0	0	0	0	0	0	0	0	0	0	0	0	0	0	0	0
Na	none	none	ZrO2	74.985	0.88	0.13	0	7	7	3_Literature	0	0	0	0	0	0	0	0	0	0	0	0	0	0	0	0	0	0	0	0	0	0	0	0	0	0	0	0	0	0	0	0	0	0	0	0	0	0	0
K	none	none	ZrO2	74.985	0.88	0.13	0	7	6	3_Literature	0	0	0	0	0	0	0	0	0	0	0	0	0	0	0	0	0	0	0	0	0	0	0	0	0	0	0	0	0	0	0	0	0	1	0	0	0	0	0
none	none	none	ZrO2	74.985	0.88	0.13	0	7	0.6	3_Literature	0	0	0	0	0	0	0	0	0	0	0	0	0	0	0	0	0	0	0	0	0	0	0	0	0	0	0	0	0	0	0	0	0	0	0	0	0	0	0
Li	none	none	MgO	78.385	0.59	0.09	0.3	7	12.6	3_Literature	0	0	0	0	0	0	0	0	0	0	0	0	0	0	0	0	0	0	0	0	0	0	0	0	0	0	0	0	0	0	0	0	0	0	0	0	0	1	0
Pb	none	none	SiO2	83.085	0.83	0.04	0.1	23.1	6.8	3_Literature	0	0	0	0	0	0	0	0	0	0	0	0	0	0	0	0	0	0	0	0	0	0	0	0	0	0	0	0	0	0	0	0	0	0	0	0	0	0	0
Co	none	none	Al2O3	64.985	0.09	0.05	0.9	1.9	0.6	3_Literature	0	0	1	0	0	0	0	0	0	0	0	0	0	0	0	0	0	1	0	0	0	0	0	0	0	0	0	0	0	0	0	0	0	0	0	0	0	0	0
Dy	Li	none	MgO	61.985	0.29	0.1	0.6	2.8	14.9	3_Literature	0	0	0	0	0	0	0	0	0	0	0	0	0	0	0	0	0	0	0	0	0	1	0	0	0	0	0	0	0	0	0	0	0	0	0	0	0	1	0
Y	none	none	ZrO2	89.985	0.01	0.01	1	1	11.7	3_Literature	0	0	0	0	0	0	0	0	0	0	0	0	0	0	0	0	0	0	0	0	0	0	0	0	0	0	0	0	0	0	0	0	0	0	0	0	0	0	0
Li	none	none	Pr2O3	74.985	0.81	0.13	0.1	6.1	10.4	3_Literature	0	0	0	0	0	0	0	0	0	0	0	0	0	0	0	0	0	0	0	0	0	0	0	0	0	0	0	0	0	0	0	0	0	0	0	0	0	1	0
Mn	Na	none	SiO2	79.985	0.22	0.04	0.7	5	8.3	3_Literature	0	0	0	0	0	0	0	0	0	0	0	0	0	0	0	0	0	0	0	0	0	0	0	0	0	0	0	0	0	0	0	0	0	0	0	0	0	0	0
Pb	Na	none	SiO2	79.985	0.22	0.04	0.8	5	8.8	3_Literature	0	0	0	0	0	0	0	0	0	0	0	0	0	0	0	0	0	0	0	0	0	0	0	0	0	0	0	0	0	0	0	0	0	0	0	0	0	0	0
Ca	none	none	CeO2	73.985	0.84	0.16	0	5.3	3.1	3_Literature	0	0	0	0	0	0	0	0	0	0	0	0	1	0	0	0	1	0	0	0	0	0	0	0	0	0	0	0	0	0	0	0	0	0	0	0	0	0	0
none	Ba	none	La2O3	74.985	0.4	0.2	0.4	2	18.1	3_Literature	0	0	0	0	0	0	1	0	0	0	0	0	0	0	0	0	0	0	0	0	0	0	0	0	0	0	0	0	0	0	0	0	0	0	0	0	1	0	0
Y	none	none	La2O3	74.985	0.14	0.07	0.8	2	4	3_Literature	0	0	0	0	0	0	0	0	0	0	0	0	0	0	0	0	0	0	0	0	0	0	0	0	0	0	0	0	0	0	0	0	0	0	0	0	1	0	0
Li	Pb	none	CaO	69.985	0.13	0.07	0.8	2	8.4	3_Literature	0	0	0	0	0	0	0	0	0	0	0	0	0	1	0	0	0	0	0	0	0	0	0	0	0	0	0	0	0	0	0	0	0	0	0	0	0	1	0
Sr	none	none	Y2O3	78.585	0.92	0.09	0	10	10.9	3_Literature	0	0	0	0	0	0	0	0	0	0	0	0	0	0	0	0	0	0	0	0	0	0	0	0	0	0	0	0	0	0	0	0	0	0	0	0	0	0	0
none	none	none	SrO	86.785	0.91	0.09	0	10	9.1	3_Literature	0	0	0	0	0	0	0	0	0	0	0	0	0	0	0	0	0	0	0	0	0	0	0	0	0	0	0	0	0	0	0	0	0	0	0	0	0	0	0
none	none	none	BaO	85.585	0.91	0.09	0	10	8.1	3_Literature	0	0	0	0	0	0	0	1	0	0	0	0	0	0	0	0	0	0	0	0	0	0	0	0	0	0	0	0	0	0	0	0	0	0	0	0	0	0	0
none	none	none	Y2O3	80.685	0.91	0.09	0	10	8.7	3_Literature	0	0	0	0	0	0	0	0	0	0	0	0	0	0	0	0	0	0	0	0	0	0	0	0	0	0	0	0	0	0	0	0	0	0	0	0	0	0	0
none	none	none	La2O3	75.885	0.91	0.09	0	10	9.8	3_Literature	0	0	0	0	0	0	0	0	0	0	0	0	0	0	0	0	0	0	0	0	0	0	0	0	0	0	0	0	0	0	0	0	0	0	0	0	1	0	0
Ca	none	none	Y2O3	82.585	0.91	0.09	0	10	7.6	3_Literature	0	0	0	0	0	0	0	0	0	0	0	0	1	0	0	0	0	0	0	0	0	0	0	0	0	0	0	0	0	0	0	0	0	0	0	0	0	0	0
Sr	none	none	Y2O3	77.785	0.91	0.09	0	10	11.6	3_Literature	0	0	0	0	0	0	0	0	0	0	0	0	0	0	0	0	0	0	0	0	0	0	0	0	0	0	0	0	0	0	0	0	0	0	0	0	0	0	0
Ba	none	none	Y2O3	77.185	0.91	0.09	0	10	11.6	3_Literature	0	0	0	0	0	0	1	0	0	0	0	0	0	0	0	0	0	0	0	0	0	0	0	0	0	0	0	0	0	0	0	0	0	0	0	0	0	0	0
Sr	none	none	ThO2	80.685	0.91	0.09	0	10	9	3_Literature	0	0	0	0	0	0	0	0	0	0	0	0	0	0	0	0	0	0	0	0	0	0	0	0	0	0	0	0	0	0	0	0	0	0	0	0	0	0	0
Sr	none	none	La2O3	75.885	0.91	0.09	0	10	11.7	3_Literature	0	0	0	0	0	0	0	0	0	0	0	0	0	0	0	0	0	0	0	0	0	0	0	0	0	0	0	0	0	0	0	0	0	0	0	0	1	0	0
Sr	none	none	Y2O3	77.785	0.92	0.09	0	10	11.4	3_Literature	0	0	0	0	0	0	0	0	0	0	0	0	0	0	0	0	0	0	0	0	0	0	0	0	0	0	0	0	0	0	0	0	0	0	0	0	0	0	0
Ba	none	none	Y2O3	77.185	0.92	0.09	0	10	11.3	3_Literature	0	0	0	0	0	0	1	0	0	0	0	0	0	0	0	0	0	0	0	0	0	0	0	0	0	0	0	0	0	0	0	0	0	0	0	0	0	0	0
Li	none	none	MgO	74.985	0.89	0.11	0	8	15.8	3_Literature	0	0	0	0	0	0	0	0	0	0	0	0	0	0	0	0	0	0	0	0	0	0	0	0	0	0	0	0	0	0	0	0	0	0	0	0	0	1	0
Pr	none	none	Na2O	79.985	0.4	0.1	0.5	4	19.4	3_Literature	0	0	0	0	0	0	0	0	0	0	0	0	0	0	0	0	0	0	0	0	0	0	0	0	0	0	0	0	0	0	0	0	0	0	0	0	0	0	0
Co	Li	none	MgO	69.985	0.67	0.07	0.3	9.6	5.9	3_Literature	0	0	0	0	0	0	0	0	0	0	0	0	0	0	0	0	0	1	0	0	0	0	0	0	0	0	0	0	0	0	0	0	0	0	0	0	0	1	0
none	none	none	La2O3	79.985	0.81	0.19	0	4.3	7.7	3_Literature	0	0	0	0	0	0	0	0	0	0	0	0	0	0	0	0	0	0	0	0	0	0	0	0	0	0	0	0	0	0	0	0	0	0	0	0	1	0	0
none	none	none	SrO	79.985	0.03	0.01	1	2	10	3_Literature	0	0	0	0	0	0	0	0	0	0	0	0	0	0	0	0	0	0	0	0	0	0	0	0	0	0	0	0	0	0	0	0	0	0	0	0	0	0	0
Zn	Li	none	MgO	80.485	0.28	0.13	0.6	2.1	15.1	3_Literature	0	0	0	0	0	0	0	0	0	0	0	0	0	0	0	0	0	0	0	0	0	0	0	0	0	0	0	0	0	0	0	0	0	0	0	0	0	1	0
Li	none	none	MgO	79.985	0.28	0.13	0.6	2.1	17.3	3_Literature	0	0	0	0	0	0	0	0	0	0	0	0	0	0	0	0	0	0	0	0	0	0	0	0	0	0	0	0	0	0	0	0	0	0	0	0	0	1	0
Mn	Li	none	MgO	80.485	0.28	0.13	0.6	2.1	20.7	3_Literature	0	0	0	0	0	0	0	0	0	0	0	0	0	0	0	0	0	0	0	0	0	0	0	0	0	0	0	0	0	0	0	0	0	0	0	0	0	1	0
Bi	none	none	MgO	79.985	0.2	0.04	0.8	5	12.4	3_Literature	0	0	0	0	0	0	0	0	0	0	1	0	0	0	0	0	0	0	0	0	0	0	0	0	0	0	0	0	0	0	0	0	0	0	0	0	0	0	0
Li	none	none	MgO	79.985	0.2	0.1	0.7	2	18	3_Literature	0	0	0	0	0	0	0	0	0	0	0	0	0	0	0	0	0	0	0	0	0	0	0	0	0	0	0	0	0	0	0	0	0	0	0	0	0	1	0
none	none	none	Al2O3	88.985	0.85	0.16	0	5.2	9	3_Literature	0	0	1	0	0	0	0	0	0	0	0	0	0	0	0	0	0	0	0	0	0	0	0	0	0	0	0	0	0	0	0	0	0	0	0	0	0	0	0
Li	none	none	MgO	64.985	0.09	0.04	0.9	2.1	17.6	3_Literature	0	0	0	0	0	0	0	0	0	0	0	0	0	0	0	0	0	0	0	0	0	0	0	0	0	0	0	0	0	0	0	0	0	0	0	0	0	1	0
Al	Li	none	MgO	64.985	0.09	0.04	0.9	2.2	18.2	3_Literature	0	1	0	0	0	0	0	0	0	0	0	0	0	0	0	0	0	0	0	0	0	0	0	0	0	0	0	0	0	0	0	0	0	0	0	0	0	1	0
Na	none	none	SrO	74.985	0.95	0.05	0	19	6.2	3_Literature	0	0	0	0	0	0	0	0	0	0	0	0	0	0	0	0	0	0	0	0	0	0	0	0	0	0	0	0	0	0	0	0	0	0	0	0	0	0	0
Pb	none	none	MgO	82.485	0.71	0.08	0.2	9	12	3_Literature	0	0	0	0	0	0	0	0	0	0	0	0	0	0	0	0	0	0	0	0	0	0	0	0	0	0	0	0	0	0	0	0	0	0	0	0	0	0	0
Li	none	Nd	MgO	91.985	0.47	0.12	0.4	4	13.8	3_Literature	0	0	0	0	0	0	0	0	0	0	0	0	0	0	0	0	0	0	0	0	0	0	0	0	0	0	0	0	0	0	0	0	0	0	0	0	0	1	0
Li	none	Nd	MgO	91.985	0.47	0.12	0.4	4	11.2	3_Literature	0	0	0	0	0	0	0	0	0	0	0	0	0	0	0	0	0	0	0	0	0	0	0	0	0	0	0	0	0	0	0	0	0	0	0	0	0	1	0
none	Nd	none	MgO	91.985	0.47	0.12	0.4	4	10.6	3_Literature	0	0	0	0	0	0	0	0	0	0	0	0	0	0	0	0	0	0	0	0	0	0	0	0	0	0	0	0	0	0	0	0	0	0	0	0	0	0	0
Li	none	Nd	MgO	91.985	0.47	0.12	0.4	4	9.5	3_Literature	0	0	0	0	0	0	0	0	0	0	0	0	0	0	0	0	0	0	0	0	0	0	0	0	0	0	0	0	0	0	0	0	0	0	0	0	0	1	0
Li	Mg	none	Al2O3	67.085	0.6	0.4	0	1.5	11.5	3_Literature	0	0	1	0	0	0	0	0	0	0	0	0	0	0	0	0	0	0	0	0	0	0	0	0	0	0	0	0	0	0	0	0	0	0	0	0	0	1	0
Li	Mg	none	Al2O3	79.585	0.95	0.05	0	19	3.6	3_Literature	0	0	1	0	0	0	0	0	0	0	0	0	0	0	0	0	0	0	0	0	0	0	0	0	0	0	0	0	0	0	0	0	0	0	0	0	0	1	0
Co	Li	Mg	Al2O3	79.985	0.91	0.09	0	10.1	4.6	3_Literature	0	0	1	0	0	0	0	0	0	0	0	0	0	0	0	0	0	1	0	0	0	0	0	0	0	0	0	0	0	0	0	0	0	0	0	0	0	1	0
Ni	Li	Mg	Al2O3	79.985	0.91	0.09	0	10.1	7.8	3_Literature	0	0	1	0	0	0	0	0	0	0	0	0	0	0	0	0	0	0	0	0	0	0	0	0	0	0	0	0	0	0	0	0	0	0	0	0	0	1	0
V	none	none	CaO	79.985	0.29	0.03	0.7	10.1	0.9	3_Literature	0	0	0	0	0	0	0	0	0	0	0	0	0	1	0	0	0	0	0	0	0	0	0	0	0	0	0	0	0	0	0	0	0	0	0	0	0	0	0
none	none	none	CaO	79.985	0.29	0.03	0.7	10.1	1.2	3_Literature	0	0	0	0	0	0	0	0	0	0	0	0	0	1	0	0	0	0	0	0	0	0	0	0	0	0	0	0	0	0	0	0	0	0	0	0	0	0	0
V	Al	none	CaO	79.985	0.29	0.03	0.7	10.1	0.1	3_Literature	0	1	0	0	0	0	0	0	0	0	0	0	0	1	0	0	0	0	0	0	0	0	0	0	0	0	0	0	0	0	0	0	0	0	0	0	0	0	0
V	Si	none	CaO	79.985	0.29	0.03	0.7	10.1	0.2	3_Literature	0	0	0	0	0	0	0	0	0	0	0	0	0	1	0	0	0	0	0	0	0	0	0	0	0	0	0	0	0	0	0	0	0	0	0	0	0	0	0
V	Ti	none	CaO	79.985	0.29	0.03	0.7	10.1	1.3	3_Literature	0	0	0	0	0	0	0	0	0	0	0	0	0	1	0	0	0	0	0	0	0	0	0	0	0	0	0	0	0	0	0	0	0	0	0	0	0	0	0
V	Zr	none	CaO	79.985	0.29	0.03	0.7	10.1	0.8	3_Literature	0	0	0	0	0	0	0	0	0	0	0	0	0	1	0	0	0	0	0	0	0	0	0	0	0	0	0	0	0	0	0	0	0	0	0	0	0	0	0
V	Ti	none	MgO	79.985	0.29	0.03	0.7	10.1	0	3_Literature	0	0	0	0	0	0	0	0	0	0	0	0	0	0	0	0	0	0	0	0	0	0	0	0	0	0	0	0	0	0	0	0	0	0	0	0	0	0	0
V	Zr	none	MgO	79.985	0.29	0.03	0.7	10.1	1.2	3_Literature	0	0	0	0	0	0	0	0	0	0	0	0	0	0	0	0	0	0	0	0	0	0	0	0	0	0	0	0	0	0	0	0	0	0	0	0	0	0	0
none	none	none	MgO	79.985	0.29	0.03	0.7	10.1	0.1	3_Literature	0	0	0	0	0	0	0	0	0	0	0	0	0	0	0	0	0	0	0	0	0	0	0	0	0	0	0	0	0	0	0	0	0	0	0	0	0	0	0
none	none	none	MgO	84.985	0.96	0.05	0	18.9	3.7	3_Literature	0	0	0	0	0	0	0	0	0	0	0	0	0	0	0	0	0	0	0	0	0	0	0	0	0	0	0	0	0	0	0	0	0	0	0	0	0	0	0
none	none	none	CaO	84.985	0.96	0.05	0	18.9	5.8	3_Literature	0	0	0	0	0	0	0	0	0	0	0	0	0	1	0	0	0	0	0	0	0	0	0	0	0	0	0	0	0	0	0	0	0	0	0	0	0	0	0
none	none	none	SrO	84.985	0.96	0.05	0	18.9	7.5	3_Literature	0	0	0	0	0	0	0	0	0	0	0	0	0	0	0	0	0	0	0	0	0	0	0	0	0	0	0	0	0	0	0	0	0	0	0	0	0	0	0
none	none	none	BaO	84.985	0.96	0.05	0	18.9	5.9	3_Literature	0	0	0	0	0	0	0	1	0	0	0	0	0	0	0	0	0	0	0	0	0	0	0	0	0	0	0	0	0	0	0	0	0	0	0	0	0	0	0
none	none	none	La2O3	84.985	0.91	0.1	0	9	9.2	3_Literature	0	0	0	0	0	0	0	0	0	0	0	0	0	0	0	0	0	0	0	0	0	0	0	0	0	0	0	0	0	0	0	0	0	0	0	0	1	0	0
none	none	none	CeO2	84.985	0.91	0.1	0	9	0.2	3_Literature	0	0	0	0	0	0	0	0	0	0	0	0	0	0	0	0	1	0	0	0	0	0	0	0	0	0	0	0	0	0	0	0	0	0	0	0	0	0	0
none	none	none	Pr2O3	84.985	0.91	0.1	0	9	3.7	3_Literature	0	0	0	0	0	0	0	0	0	0	0	0	0	0	0	0	0	0	0	0	0	0	0	0	0	0	0	0	0	0	0	0	0	0	0	0	0	0	0
none	none	none	Nd2O3	84.985	0.91	0.1	0	9	7.7	3_Literature	0	0	0	0	0	0	0	0	0	0	0	0	0	0	0	0	0	0	0	0	0	0	0	0	0	0	0	0	0	0	0	0	0	0	0	0	0	0	0
none	none	none	Sm2O3	84.985	0.91	0.1	0	9	8.9	3_Literature	0	0	0	0	0	0	0	0	0	0	0	0	0	0	0	0	0	0	0	0	0	0	0	0	0	0	0	0	0	0	0	0	0	0	0	0	0	0	0
none	none	none	Eu2O3	84.985	0.91	0.1	0	9	7.7	3_Literature	0	0	0	0	0	0	0	0	0	0	0	0	0	0	0	0	0	0	0	0	0	0	0	0	0	1	0	0	0	0	0	0	0	0	0	0	0	0	0
none	none	none	Gd2O3	84.985	0.91	0.1	0	9	8.6	3_Literature	0	0	0	0	0	0	0	0	0	0	0	0	0	0	0	0	0	0	0	0	0	0	0	0	0	0	0	0	0	1	0	0	0	0	0	0	0	0	0
none	none	none	Tb2O3	84.985	0.91	0.1	0	9	2.2	3_Literature	0	0	0	0	0	0	0	0	0	0	0	0	0	0	0	0	0	0	0	0	0	0	0	0	0	0	0	0	0	0	0	0	0	0	0	0	0	0	0
none	none	none	Dy2O3	84.985	0.91	0.1	0	9	6.9	3_Literature	0	0	0	0	0	0	0	0	0	0	0	0	0	0	0	0	0	0	0	0	0	0	1	0	0	0	0	0	0	0	0	0	0	0	0	0	0	0	0
none	none	none	Yb2O3	84.985	0.91	0.1	0	9	4.5	3_Literature	0	0	0	0	0	0	0	0	0	0	0	0	0	0	0	0	0	0	0	0	0	0	0	0	0	0	0	0	0	0	0	0	0	0	0	0	0	0	0
Pb	none	none	Al2O3	71.985	0.03	0	1	9.3	8.2	3_Literature	0	0	1	0	0	0	0	0	0	0	0	0	0	0	0	0	0	0	0	0	0	0	0	0	0	0	0	0	0	0	0	0	0	0	0	0	0	0	0
none	none	none	MgO	74.985	0.2	0.05	0.8	4	2.2	3_Literature	0	0	0	0	0	0	0	0	0	0	0	0	0	0	0	0	0	0	0	0	0	0	0	0	0	0	0	0	0	0	0	0	0	0	0	0	0	0	0
Li	none	none	MgO	69.985	0.48	0.11	0.4	4.4	14.7	3_Literature	0	0	0	0	0	0	0	0	0	0	0	0	0	0	0	0	0	0	0	0	0	0	0	0	0	0	0	0	0	0	0	0	0	0	0	0	0	1	0
Li	none	none	CaO	71.085	0.48	0.11	0.4	4.4	13.2	3_Literature	0	0	0	0	0	0	0	0	0	0	0	0	0	1	0	0	0	0	0	0	0	0	0	0	0	0	0	0	0	0	0	0	0	0	0	0	0	1	0
Li	none	none	ZnO	71.985	0.51	0.15	0.3	3.5	9.6	3_Literature	0	0	0	0	0	0	0	0	0	0	0	0	0	0	0	0	0	0	0	0	0	0	0	0	0	0	0	0	0	0	0	0	0	0	0	0	0	1	0
Mo	none	none	Na2O	72.585	0.52	0.48	0	1.1	8.9	3_Literature	0	0	0	0	0	0	0	0	0	0	0	0	0	0	0	0	0	0	0	0	0	0	0	0	0	0	0	0	0	0	0	0	0	0	0	0	0	0	0
Na	W	none	SiO2	79.985	0.5	0.1	0.4	4.8	17.5	3_Literature	0	0	0	0	0	0	0	0	0	0	0	0	0	0	0	0	0	0	0	0	0	0	0	0	0	0	0	0	0	0	0	0	0	0	0	0	0	0	0
Li	none	none	MgO	66.785	0.51	0.1	0.4	5	5.7	3_Literature	0	0	0	0	0	0	0	0	0	0	0	0	0	0	0	0	0	0	0	0	0	0	0	0	0	0	0	0	0	0	0	0	0	0	0	0	0	1	0
Zn	Li	none	MgO	67.485	0.51	0.1	0.4	5	10.3	3_Literature	0	0	0	0	0	0	0	0	0	0	0	0	0	0	0	0	0	0	0	0	0	0	0	0	0	0	0	0	0	0	0	0	0	0	0	0	0	1	0
Li	none	none	CaO	70.485	0.51	0.1	0.4	5	11.2	3_Literature	0	0	0	0	0	0	0	0	0	0	0	0	0	1	0	0	0	0	0	0	0	0	0	0	0	0	0	0	0	0	0	0	0	0	0	0	0	1	0
Li	none	none	ZnO	69.985	0.51	0.1	0.4	5	6.1	3_Literature	0	0	0	0	0	0	0	0	0	0	0	0	0	0	0	0	0	0	0	0	0	0	0	0	0	0	0	0	0	0	0	0	0	0	0	0	0	1	0
Li	none	none	MgO	74.485	0.8	0.2	0	4	16.1	3_Literature	0	0	0	0	0	0	0	0	0	0	0	0	0	0	0	0	0	0	0	0	0	0	0	0	0	0	0	0	0	0	0	0	0	0	0	0	0	1	0
Li	none	none	SiO2	79.985	0.83	0.17	0	4.9	6	3_Literature	0	0	0	0	0	0	0	0	0	0	0	0	0	0	0	0	0	0	0	0	0	0	0	0	0	0	0	0	0	0	0	0	0	0	0	0	0	1	0
Co	none	none	SiO2	79.985	0.83	0.17	0	4.9	1.3	3_Literature	0	0	0	0	0	0	0	0	0	0	0	0	0	0	0	0	0	1	0	0	0	0	0	0	0	0	0	0	0	0	0	0	0	0	0	0	0	0	0
none	none	none	Pr2O3	74.985	0.28	0.04	0.7	7	2.1	3_Literature	0	0	0	0	0	0	0	0	0	0	0	0	0	0	0	0	0	0	0	0	0	0	0	0	0	0	0	0	0	0	0	0	0	0	0	0	0	0	0
none	none	none	Sm2O3	74.985	0.28	0.04	0.7	7	8.6	3_Literature	0	0	0	0	0	0	0	0	0	0	0	0	0	0	0	0	0	0	0	0	0	0	0	0	0	0	0	0	0	0	0	0	0	0	0	0	0	0	0
none	none	none	La2O3	74.985	0.28	0.04	0.7	7	8.9	3_Literature	0	0	0	0	0	0	0	0	0	0	0	0	0	0	0	0	0	0	0	0	0	0	0	0	0	0	0	0	0	0	0	0	0	0	0	0	1	0	0
none	none	none	CeO2	74.985	0.28	0.04	0.7	7	0	3_Literature	0	0	0	0	0	0	0	0	0	0	0	0	0	0	0	0	1	0	0	0	0	0	0	0	0	0	0	0	0	0	0	0	0	0	0	0	0	0	0
none	none	none	ZrO2	74.985	0.32	0.08	0.6	4	0.4	3_Literature	0	0	0	0	0	0	0	0	0	0	0	0	0	0	0	0	0	0	0	0	0	0	0	0	0	0	0	0	0	0	0	0	0	0	0	0	0	0	0
none	none	none	La2O3	79.485	0.3	0.05	0.7	6	9.2	3_Literature	0	0	0	0	0	0	0	0	0	0	0	0	0	0	0	0	0	0	0	0	0	0	0	0	0	0	0	0	0	0	0	0	0	0	0	0	1	0	0
none	Sr	none	La2O3	79.485	0.3	0.05	0.7	6	10.9	3_Literature	0	0	0	0	0	0	0	0	0	0	0	0	0	0	0	0	0	0	0	0	0	0	0	0	0	0	0	0	0	0	0	0	0	0	0	0	1	0	0
none	none	none	Y2O3	79.485	0.3	0.05	0.7	6	6.2	3_Literature	0	0	0	0	0	0	0	0	0	0	0	0	0	0	0	0	0	0	0	0	0	0	0	0	0	0	0	0	0	0	0	0	0	0	0	0	0	0	0
Li	Na	none	SiO2	77.485	0.28	0.04	0.7	7.3	0.3	3_Literature	0	0	0	0	0	0	0	0	0	0	0	0	0	0	0	0	0	0	0	0	0	0	0	0	0	0	0	0	0	0	0	0	0	0	0	0	0	1	0
Li	K	none	SiO2	77.485	0.28	0.04	0.7	7.3	0.8	3_Literature	0	0	0	0	0	0	0	0	0	0	0	0	0	0	0	0	0	0	0	0	0	0	0	0	0	0	0	0	0	0	0	0	0	1	0	0	0	1	0
Li	Rb	none	SiO2	77.485	0.28	0.04	0.7	7.3	0.4	3_Literature	0	0	0	0	0	0	0	0	0	0	0	0	0	0	0	0	0	0	0	0	0	0	0	0	0	0	0	0	0	0	0	0	0	0	0	0	0	1	0
Li	Cs	none	SiO2	77.485	0.28	0.04	0.7	7.3	2.2	3_Literature	0	0	0	0	0	0	0	0	0	0	0	0	0	0	0	0	0	0	0	1	0	0	0	0	0	0	0	0	0	0	0	0	0	0	0	0	0	1	0
Na	K	none	SiO2	77.485	0.28	0.04	0.7	7.3	0.5	3_Literature	0	0	0	0	0	0	0	0	0	0	0	0	0	0	0	0	0	0	0	0	0	0	0	0	0	0	0	0	0	0	0	0	0	1	0	0	0	0	0
Na	Rb	none	SiO2	77.485	0.28	0.04	0.7	7.3	0.3	3_Literature	0	0	0	0	0	0	0	0	0	0	0	0	0	0	0	0	0	0	0	0	0	0	0	0	0	0	0	0	0	0	0	0	0	0	0	0	0	0	0
Na	Cs	none	SiO2	77.485	0.28	0.04	0.7	7.3	0.5	3_Literature	0	0	0	0	0	0	0	0	0	0	0	0	0	0	0	0	0	0	0	1	0	0	0	0	0	0	0	0	0	0	0	0	0	0	0	0	0	0	0
K	Rb	none	SiO2	77.485	0.28	0.04	0.7	7.3	0.1	3_Literature	0	0	0	0	0	0	0	0	0	0	0	0	0	0	0	0	0	0	0	0	0	0	0	0	0	0	0	0	0	0	0	0	0	1	0	0	0	0	0
K	Cs	none	SiO2	77.485	0.28	0.04	0.7	7.3	0.2	3_Literature	0	0	0	0	0	0	0	0	0	0	0	0	0	0	0	0	0	0	0	1	0	0	0	0	0	0	0	0	0	0	0	0	0	1	0	0	0	0	0
Rb	Cs	none	SiO2	77.485	0.28	0.04	0.7	7.3	0.2	3_Literature	0	0	0	0	0	0	0	0	0	0	0	0	0	0	0	0	0	0	0	1	0	0	0	0	0	0	0	0	0	0	0	0	0	0	0	0	0	0	0
Mg	Ca	none	SiO2	77.485	0.28	0.04	0.7	7.3	1.2	3_Literature	0	0	0	0	0	0	0	0	0	0	0	0	1	0	0	0	0	0	0	0	0	0	0	0	0	0	0	0	0	0	0	0	0	0	0	0	0	0	0
Mg	Sr	none	SiO2	77.485	0.28	0.04	0.7	7.3	2.1	3_Literature	0	0	0	0	0	0	0	0	0	0	0	0	0	0	0	0	0	0	0	0	0	0	0	0	0	0	0	0	0	0	0	0	0	0	0	0	0	0	0
Mg	Ba	none	SiO2	77.485	0.28	0.04	0.7	7.3	0.9	3_Literature	0	0	0	0	0	0	1	0	0	0	0	0	0	0	0	0	0	0	0	0	0	0	0	0	0	0	0	0	0	0	0	0	0	0	0	0	0	0	0
Ca	Sr	none	SiO2	77.485	0.28	0.04	0.7	7.3	1.4	3_Literature	0	0	0	0	0	0	0	0	0	0	0	0	1	0	0	0	0	0	0	0	0	0	0	0	0	0	0	0	0	0	0	0	0	0	0	0	0	0	0
Ca	Ba	none	SiO2	77.485	0.28	0.04	0.7	7.3	1.3	3_Literature	0	0	0	0	0	0	1	0	0	0	0	0	1	0	0	0	0	0	0	0	0	0	0	0	0	0	0	0	0	0	0	0	0	0	0	0	0	0	0
Sr	Ba	none	SiO2	77.485	0.28	0.04	0.7	7.3	1.3	3_Literature	0	0	0	0	0	0	1	0	0	0	0	0	0	0	0	0	0	0	0	0	0	0	0	0	0	0	0	0	0	0	0	0	0	0	0	0	0	0	0
Pb	none	none	MgO	69.985	0.29	0.04	0.7	6.9	2.1	3_Literature	0	0	0	0	0	0	0	0	0	0	0	0	0	0	0	0	0	0	0	0	0	0	0	0	0	0	0	0	0	0	0	0	0	0	0	0	0	0	0
none	none	none	MgO	74.985	0.81	0.2	0	4	1.7	3_Literature	0	0	0	0	0	0	0	0	0	0	0	0	0	0	0	0	0	0	0	0	0	0	0	0	0	0	0	0	0	0	0	0	0	0	0	0	0	0	0
Mo	none	none	Na2O	72.985	0.25	0.28	0.5	0.9	3.3	3_Literature	0	0	0	0	0	0	0	0	0	0	0	0	0	0	0	0	0	0	0	0	0	0	0	0	0	0	0	0	0	0	0	0	0	0	0	0	0	0	0
none	none	none	ZrO2	69.985	0.38	0.13	0.5	3	4.2	3_Literature	0	0	0	0	0	0	0	0	0	0	0	0	0	0	0	0	0	0	0	0	0	0	0	0	0	0	0	0	0	0	0	0	0	0	0	0	0	0	0
none	none	none	CeO2	49.985	0.38	0.13	0.5	3	0.4	3_Literature	0	0	0	0	0	0	0	0	0	0	0	0	0	0	0	0	1	0	0	0	0	0	0	0	0	0	0	0	0	0	0	0	0	0	0	0	0	0	0
none	none	none	ThO2	84.985	0.38	0.13	0.5	3	7.7	3_Literature	0	0	0	0	0	0	0	0	0	0	0	0	0	0	0	0	0	0	0	0	0	0	0	0	0	0	0	0	0	0	0	0	0	0	0	0	0	0	0
none	none	none	La2O3	64.985	0.38	0.13	0.5	3	0.8	3_Literature	0	0	0	0	0	0	0	0	0	0	0	0	0	0	0	0	0	0	0	0	0	0	0	0	0	0	0	0	0	0	0	0	0	0	0	0	1	0	0
none	none	none	SiO2	79.985	0.55	0.18	0.3	3	0.5	3_Literature	0	0	0	0	0	0	0	0	0	0	0	0	0	0	0	0	0	0	0	0	0	0	0	0	0	0	0	0	0	0	0	0	0	0	0	0	0	0	0
Mn	none	none	SiO2	79.985	0.55	0.18	0.3	3	5.6	3_Literature	0	0	0	0	0	0	0	0	0	0	0	0	0	0	0	0	0	0	0	0	0	0	0	0	0	0	0	0	0	0	0	0	0	0	0	0	0	0	0
W	Na	none	SiO2	79.985	0.55	0.18	0.3	3	9.1	3_Literature	0	0	0	0	0	0	0	0	0	0	0	0	0	0	0	0	0	0	0	0	0	0	0	0	0	0	0	0	0	0	0	0	0	0	0	0	0	0	0
Mn	W	Na	SiO2	79.985	0.55	0.18	0.3	3	23.9	3_Literature	0	0	0	0	0	0	0	0	0	0	0	0	0	0	0	0	0	0	0	0	0	0	0	0	0	0	0	0	0	0	0	0	0	0	0	0	0	0	0
none	none	none	CaO	79.985	0.9	0.1	0	9	6.6	3_Literature	0	0	0	0	0	0	0	0	0	0	0	0	0	1	0	0	0	0	0	0	0	0	0	0	0	0	0	0	0	0	0	0	0	0	0	0	0	0	0
Li	none	none	TiO2	89.985	0.5	0.16	0.4	3.1	8.4	3_Literature	0	0	0	0	0	0	0	0	0	0	0	0	0	0	0	0	0	0	0	0	0	0	0	0	0	0	0	0	0	0	0	0	0	0	0	0	0	1	0
none	none	none	Al2O3	74.985	0.4	0.04	0.6	10.9	0.5	3_Literature	0	0	1	0	0	0	0	0	0	0	0	0	0	0	0	0	0	0	0	0	0	0	0	0	0	0	0	0	0	0	0	0	0	0	0	0	0	0	0
Pb	none	none	Al2O3	74.985	0.4	0.04	0.6	10.9	2.2	3_Literature	0	0	1	0	0	0	0	0	0	0	0	0	0	0	0	0	0	0	0	0	0	0	0	0	0	0	0	0	0	0	0	0	0	0	0	0	0	0	0
Pb	Na	none	Al2O3	74.985	0.4	0.04	0.6	10.9	3.2	3_Literature	0	0	1	0	0	0	0	0	0	0	0	0	0	0	0	0	0	0	0	0	0	0	0	0	0	0	0	0	0	0	0	0	0	0	0	0	0	0	0
Si	none	none	SrO	84.985	0.95	0.05	0	19	8.1	3_Literature	0	0	0	0	0	0	0	0	0	0	0	0	0	0	0	0	0	0	0	0	0	0	0	0	0	0	0	0	0	0	0	0	0	0	0	0	0	0	0
none	none	none	BaO	84.985	0.95	0.05	0	19	7.7	3_Literature	0	0	0	0	0	0	0	1	0	0	0	0	0	0	0	0	0	0	0	0	0	0	0	0	0	0	0	0	0	0	0	0	0	0	0	0	0	0	0
Sr	none	none	MgO	84.985	0.95	0.05	0	19	8.5	3_Literature	0	0	0	0	0	0	0	0	0	0	0	0	0	0	0	0	0	0	0	0	0	0	0	0	0	0	0	0	0	0	0	0	0	0	0	0	0	0	0
Ba	none	none	MgO	84.985	0.95	0.05	0	19	8.5	3_Literature	0	0	0	0	0	0	1	0	0	0	0	0	0	0	0	0	0	0	0	0	0	0	0	0	0	0	0	0	0	0	0	0	0	0	0	0	0	0	0
Li	Sr	none	MgO	84.985	0.95	0.05	0	19	8.8	3_Literature	0	0	0	0	0	0	0	0	0	0	0	0	0	0	0	0	0	0	0	0	0	0	0	0	0	0	0	0	0	0	0	0	0	0	0	0	0	1	0
Na	Sr	none	MgO	84.985	0.95	0.05	0	19	8.4	3_Literature	0	0	0	0	0	0	0	0	0	0	0	0	0	0	0	0	0	0	0	0	0	0	0	0	0	0	0	0	0	0	0	0	0	0	0	0	0	0	0
Al	Sr	none	MgO	84.985	0.95	0.05	0	19	8.5	3_Literature	0	1	0	0	0	0	0	0	0	0	0	0	0	0	0	0	0	0	0	0	0	0	0	0	0	0	0	0	0	0	0	0	0	0	0	0	0	0	0
Fe	Sr	none	MgO	84.985	0.95	0.05	0	19	5.3	3_Literature	0	0	0	0	0	0	0	0	0	0	0	0	0	0	0	0	0	0	0	0	0	0	0	0	0	0	1	0	0	0	0	0	0	0	0	0	0	0	0
La	Sr	none	MgO	84.985	0.95	0.05	0	19	9	3_Literature	0	0	0	0	0	0	0	0	0	0	0	0	0	0	0	0	0	0	0	0	0	0	0	0	0	0	0	0	0	0	0	0	0	0	0	1	0	0	0
Zr	Sr	none	MgO	84.985	0.95	0.05	0	19	8.5	3_Literature	0	0	0	0	0	0	0	0	0	0	0	0	0	0	0	0	0	0	0	0	0	0	0	0	0	0	0	0	0	0	0	0	0	0	0	0	0	0	0
Nb	Sr	none	MgO	84.985	0.95	0.05	0	19	9.2	3_Literature	0	0	0	0	0	0	0	0	0	0	0	0	0	0	0	0	0	0	0	0	0	0	0	0	0	0	0	0	0	0	0	0	0	0	0	0	0	0	0
Mo	Sr	none	MgO	84.985	0.95	0.05	0	19	5.5	3_Literature	0	0	0	0	0	0	0	0	0	0	0	0	0	0	0	0	0	0	0	0	0	0	0	0	0	0	0	0	0	0	0	0	0	0	0	0	0	0	0
Li	Ba	none	MgO	84.985	0.95	0.05	0	19	8.6	3_Literature	0	0	0	0	0	0	1	0	0	0	0	0	0	0	0	0	0	0	0	0	0	0	0	0	0	0	0	0	0	0	0	0	0	0	0	0	0	1	0
Na	Ba	none	MgO	84.985	0.95	0.05	0	19	8.6	3_Literature	0	0	0	0	0	0	1	0	0	0	0	0	0	0	0	0	0	0	0	0	0	0	0	0	0	0	0	0	0	0	0	0	0	0	0	0	0	0	0
La	Ba	none	MgO	84.985	0.95	0.05	0	19	8.3	3_Literature	0	0	0	0	0	0	1	0	0	0	0	0	0	0	0	0	0	0	0	0	0	0	0	0	0	0	0	0	0	0	0	0	0	0	0	1	0	0	0
Sm	Ba	none	MgO	84.985	0.95	0.05	0	19	8.4	3_Literature	0	0	0	0	0	0	1	0	0	0	0	0	0	0	0	0	0	0	0	0	0	0	0	0	0	0	0	0	0	0	0	0	0	0	0	0	0	0	0
Zr	Ba	none	MgO	84.985	0.95	0.05	0	19	7.6	3_Literature	0	0	0	0	0	0	1	0	0	0	0	0	0	0	0	0	0	0	0	0	0	0	0	0	0	0	0	0	0	0	0	0	0	0	0	0	0	0	0
none	none	none	La2O3	79.985	0.33	0.07	0.6	5	15.1	3_Literature	0	0	0	0	0	0	0	0	0	0	0	0	0	0	0	0	0	0	0	0	0	0	0	0	0	0	0	0	0	0	0	0	0	0	0	0	1	0	0
Ni	K	none	CaO	62.985	0.3	0.12	0.6	2.5	20.1	3_Literature	0	0	0	0	0	0	0	0	0	0	0	0	0	1	0	0	0	0	0	0	0	0	0	0	0	0	0	0	0	0	0	0	0	1	0	0	0	0	0
Ni	K	none	CaO	64.985	0.3	0.12	0.6	2.5	18.7	3_Literature	0	0	0	0	0	0	0	0	0	0	0	0	0	1	0	0	0	0	0	0	0	0	0	0	0	0	0	0	0	0	0	0	0	1	0	0	0	0	0
Ni	K	none	CaO	62.985	0.3	0.12	0.6	2.5	18.9	3_Literature	0	0	0	0	0	0	0	0	0	0	0	0	0	1	0	0	0	0	0	0	0	0	0	0	0	0	0	0	0	0	0	0	0	1	0	0	0	0	0
Co	K	none	CaO	74.985	0.3	0.12	0.6	2.5	18.2	3_Literature	0	0	0	0	0	0	0	0	0	0	0	0	0	1	0	0	0	1	0	0	0	0	0	0	0	0	0	0	0	0	0	0	0	1	0	0	0	0	0
Ni	K	none	BaO	77.985	0.3	0.12	0.6	2.5	10.2	3_Literature	0	0	0	0	0	0	0	1	0	0	0	0	0	0	0	0	0	0	0	0	0	0	0	0	0	0	0	0	0	0	0	0	0	1	0	0	0	0	0
Sn	Li	none	MgO	64.985	0.3	0.12	0.6	2.5	8	3_Literature	0	0	0	0	0	0	0	0	0	0	0	0	0	0	0	0	0	0	0	0	0	0	0	0	0	0	0	0	0	0	0	0	0	0	0	0	0	1	0
none	Ti	none	SrO	72.985	0.29	0.14	0.6	2	4.2	3_Literature	0	0	0	0	0	0	0	0	0	0	0	0	0	0	0	0	0	0	0	0	0	0	0	0	0	0	0	0	0	0	0	0	0	0	0	0	0	0	0
none	Sn	none	SrO	72.985	0.29	0.14	0.6	2	2.2	3_Literature	0	0	0	0	0	0	0	0	0	0	0	0	0	0	0	0	0	0	0	0	0	0	0	0	0	0	0	0	0	0	0	0	0	0	0	0	0	0	0
none	Zr	none	SrO	72.985	0.29	0.14	0.6	2	3.2	3_Literature	0	0	0	0	0	0	0	0	0	0	0	0	0	0	0	0	0	0	0	0	0	0	0	0	0	0	0	0	0	0	0	0	0	0	0	0	0	0	0
Sr	none	none	La2O3	69.985	0.83	0.17	0	4.8	13.8	3_Literature	0	0	0	0	0	0	0	0	0	0	0	0	0	0	0	0	0	0	0	0	0	0	0	0	0	0	0	0	0	0	0	0	0	0	0	0	1	0	0
none	none	none	La2O3	59.985	0.2	0.25	0.6	0.8	13	3_Literature	0	0	0	0	0	0	0	0	0	0	0	0	0	0	0	0	0	0	0	0	0	0	0	0	0	0	0	0	0	0	0	0	0	0	0	0	1	0	0
none	none	none	SrO	74.985	0.2	0.25	0.6	0.8	0.5	3_Literature	0	0	0	0	0	0	0	0	0	0	0	0	0	0	0	0	0	0	0	0	0	0	0	0	0	0	0	0	0	0	0	0	0	0	0	0	0	0	0
Sr	none	none	La2O3	59.985	0.2	0.25	0.6	0.8	14.1	3_Literature	0	0	0	0	0	0	0	0	0	0	0	0	0	0	0	0	0	0	0	0	0	0	0	0	0	0	0	0	0	0	0	0	0	0	0	0	1	0	0
Fe	none	none	SiO2	84.985	0.05	0.03	0.9	1.7	6	3_Literature	0	0	0	0	0	0	0	0	0	0	0	0	0	0	0	0	0	0	0	0	0	0	0	0	0	0	1	0	0	0	0	0	0	0	0	0	0	0	0
Nb	none	none	Na2O	74.985	0.9	0.1	0	9	0.6	3_Literature	0	0	0	0	0	0	0	0	0	0	0	0	0	0	0	0	0	0	0	0	0	0	0	0	0	0	0	0	0	0	0	0	0	0	0	0	0	0	0
Mn	Mg	none	Na2O	74.985	0.75	0.25	0	3	6.1	3_Literature	0	0	0	0	0	0	0	0	0	0	0	0	0	0	0	0	0	0	0	0	0	0	0	0	0	0	0	0	0	0	0	0	0	0	0	0	0	0	0
none	none	none	CaO	73.985	0.67	0.07	0.3	9.6	5.6	3_Literature	0	0	0	0	0	0	0	0	0	0	0	0	0	1	0	0	0	0	0	0	0	0	0	0	0	0	0	0	0	0	0	0	0	0	0	0	0	0	0
Na	none	none	CaO	73.985	0.67	0.07	0.3	9.6	9.9	3_Literature	0	0	0	0	0	0	0	0	0	0	0	0	0	1	0	0	0	0	0	0	0	0	0	0	0	0	0	0	0	0	0	0	0	0	0	0	0	0	0
Li	none	none	CaO	73.985	0.67	0.07	0.3	9.6	10.1	3_Literature	0	0	0	0	0	0	0	0	0	0	0	0	0	1	0	0	0	0	0	0	0	0	0	0	0	0	0	0	0	0	0	0	0	0	0	0	0	1	0
Pb	none	none	Al2O3	84.985	0.48	0.07	0.5	7.1	6.1	3_Literature	0	0	1	0	0	0	0	0	0	0	0	0	0	0	0	0	0	0	0	0	0	0	0	0	0	0	0	0	0	0	0	0	0	0	0	0	0	0	0
Pb	none	none	Al2O3	71.985	0.36	0.05	0.6	7.3	7.9	3_Literature	0	0	1	0	0	0	0	0	0	0	0	0	0	0	0	0	0	0	0	0	0	0	0	0	0	0	0	0	0	0	0	0	0	0	0	0	0	0	0
none	none	none	SrO	74.985	0.75	0.25	0	3	0.5	3_Literature	0	0	0	0	0	0	0	0	0	0	0	0	0	0	0	0	0	0	0	0	0	0	0	0	0	0	0	0	0	0	0	0	0	0	0	0	0	0	0
Sr	none	none	La2O3	69.985	0.75	0.25	0	3	15.4	3_Literature	0	0	0	0	0	0	0	0	0	0	0	0	0	0	0	0	0	0	0	0	0	0	0	0	0	0	0	0	0	0	0	0	0	0	0	0	1	0	0
Pb	none	none	CaO	69.985	0.29	0.04	0.7	7.3	11.7	3_Literature	0	0	0	0	0	0	0	0	0	0	0	0	0	1	0	0	0	0	0	0	0	0	0	0	0	0	0	0	0	0	0	0	0	0	0	0	0	0	0
none	none	none	Fe2O3	74.985	0.32	0.08	0.6	4	0	3_Literature	0	0	0	0	0	0	0	0	0	0	0	0	0	0	0	0	0	0	0	0	0	0	0	0	0	0	0	1	0	0	0	0	0	0	0	0	0	0	0
Au	La	none	CaO	79.985	0.69	0.31	0	2.2	11.6	3_Literature	0	0	0	1	0	0	0	0	0	0	0	0	0	1	0	0	0	0	0	0	0	0	0	0	0	0	0	0	0	0	0	0	0	0	0	1	0	0	0
La	none	none	CaO	79.985	0.9	0.1	0	9	10	3_Literature	0	0	0	0	0	0	0	0	0	0	0	0	0	1	0	0	0	0	0	0	0	0	0	0	0	0	0	0	0	0	0	0	0	0	0	1	0	0	0
Sr	La	none	CaO	79.985	0.9	0.1	0	9	13	3_Literature	0	0	0	0	0	0	0	0	0	0	0	0	0	1	0	0	0	0	0	0	0	0	0	0	0	0	0	0	0	0	0	0	0	0	0	1	0	0	0
Na	none	none	CaO	78.985	0.9	0.1	0	9	14.4	3_Literature	0	0	0	0	0	0	0	0	0	0	0	0	0	1	0	0	0	0	0	0	0	0	0	0	0	0	0	0	0	0	0	0	0	0	0	0	0	0	0
none	none	none	TiO2	79.985	0.75	0.25	0	3	0.9	3_Literature	0	0	0	0	0	0	0	0	0	0	0	0	0	0	0	0	0	0	0	0	0	0	0	0	0	0	0	0	0	0	0	0	0	0	0	0	0	0	0
Mn	none	none	TiO2	79.985	0.75	0.25	0	3	4.1	3_Literature	0	0	0	0	0	0	0	0	0	0	0	0	0	0	0	0	0	0	0	0	0	0	0	0	0	0	0	0	0	0	0	0	0	0	0	0	0	0	0
La	Mn	none	TiO2	79.985	0.75	0.25	0	3	0.4	3_Literature	0	0	0	0	0	0	0	0	0	0	0	0	0	0	0	0	0	0	0	0	0	0	0	0	0	0	0	0	0	0	0	0	0	0	0	1	0	0	0
Li	Mn	none	TiO2	79.985	0.75	0.25	0	3	15.8	3_Literature	0	0	0	0	0	0	0	0	0	0	0	0	0	0	0	0	0	0	0	0	0	0	0	0	0	0	0	0	0	0	0	0	0	0	0	0	0	1	0
Sr	none	none	SiO2	77.485	0.28	0.04	0.7	7.1	1.5	3_Literature	0	0	0	0	0	0	0	0	0	0	0	0	0	0	0	0	0	0	0	0	0	0	0	0	0	0	0	0	0	0	0	0	0	0	0	0	0	0	0
Li	Sr	none	SiO2	77.485	0.28	0.04	0.7	7.1	2.3	3_Literature	0	0	0	0	0	0	0	0	0	0	0	0	0	0	0	0	0	0	0	0	0	0	0	0	0	0	0	0	0	0	0	0	0	0	0	0	0	1	0
Ce	Li	none	MgO	72.985	0.67	0.33	0	2	14.9	3_Literature	0	0	0	0	0	0	0	0	0	0	0	0	0	0	0	1	0	0	0	0	0	0	0	0	0	0	0	0	0	0	0	0	0	0	0	0	0	1	0
none	none	none	Bi2O3	81.485	0.34	0.13	0.5	2.6	4.5	3_Literature	0	0	0	0	0	0	0	0	0	0	0	1	0	0	0	0	0	0	0	0	0	0	0	0	0	0	0	0	0	0	0	0	0	0	0	0	0	0	0
Sm	none	none	Bi2O3	81.485	0.34	0.13	0.5	2.6	6.1	3_Literature	0	0	0	0	0	0	0	0	0	0	0	1	0	0	0	0	0	0	0	0	0	0	0	0	0	0	0	0	0	0	0	0	0	0	0	0	0	0	0
Er	none	none	Bi2O3	81.485	0.34	0.13	0.5	2.6	6.1	3_Literature	0	0	0	0	0	0	0	0	0	0	0	1	0	0	0	0	0	0	0	0	0	0	0	1	0	0	0	0	0	0	0	0	0	0	0	0	0	0	0
Lu	none	none	Bi2O3	81.485	0.34	0.13	0.5	2.6	6.5	3_Literature	0	0	0	0	0	0	0	0	0	0	0	1	0	0	0	0	0	0	0	0	0	0	0	0	0	0	0	0	0	0	0	0	0	0	0	0	0	0	0
W	none	none	SiO2	79.985	0.43	0.14	0.4	3.1	0.9	3_Literature	0	0	0	0	0	0	0	0	0	0	0	0	0	0	0	0	0	0	0	0	0	0	0	0	0	0	0	0	0	0	0	0	0	0	0	0	0	0	0
Na	W	none	SiO2	79.985	0.43	0.14	0.4	3.1	16.4	3_Literature	0	0	0	0	0	0	0	0	0	0	0	0	0	0	0	0	0	0	0	0	0	0	0	0	0	0	0	0	0	0	0	0	0	0	0	0	0	0	0
Li	W	none	SiO2	79.985	0.43	0.14	0.4	3.1	8.9	3_Literature	0	0	0	0	0	0	0	0	0	0	0	0	0	0	0	0	0	0	0	0	0	0	0	0	0	0	0	0	0	0	0	0	0	0	0	0	0	1	0
Na	W	none	SiO2	77.985	0.42	0.09	0.5	4.8	3	3_Literature	0	0	0	0	0	0	0	0	0	0	0	0	0	0	0	0	0	0	0	0	0	0	0	0	0	0	0	0	0	0	0	0	0	0	0	0	0	0	0
Na	W	none	La2O3	77.985	0.42	0.09	0.5	4.8	13.8	3_Literature	0	0	0	0	0	0	0	0	0	0	0	0	0	0	0	0	0	0	0	0	0	0	0	0	0	0	0	0	0	0	0	0	0	0	0	0	1	0	0
Na	W	none	CeO2	77.985	0.42	0.09	0.5	4.8	16.5	3_Literature	0	0	0	0	0	0	0	0	0	0	0	0	0	0	0	0	1	0	0	0	0	0	0	0	0	0	0	0	0	0	0	0	0	0	0	0	0	0	0
Na	W	none	Pr2O3	77.985	0.42	0.09	0.5	4.8	17.2	3_Literature	0	0	0	0	0	0	0	0	0	0	0	0	0	0	0	0	0	0	0	0	0	0	0	0	0	0	0	0	0	0	0	0	0	0	0	0	0	0	0
Na	W	none	Nd2O3	77.985	0.42	0.09	0.5	4.8	16.2	3_Literature	0	0	0	0	0	0	0	0	0	0	0	0	0	0	0	0	0	0	0	0	0	0	0	0	0	0	0	0	0	0	0	0	0	0	0	0	0	0	0
Na	W	none	Sm2O3	77.985	0.42	0.09	0.5	4.8	16.6	3_Literature	0	0	0	0	0	0	0	0	0	0	0	0	0	0	0	0	0	0	0	0	0	0	0	0	0	0	0	0	0	0	0	0	0	0	0	0	0	0	0
Na	W	none	Tb2O3	77.985	0.42	0.09	0.5	4.8	14.9	3_Literature	0	0	0	0	0	0	0	0	0	0	0	0	0	0	0	0	0	0	0	0	0	0	0	0	0	0	0	0	0	0	0	0	0	0	0	0	0	0	0
Na	W	none	Dy2O3	77.985	0.42	0.09	0.5	4.8	13.3	3_Literature	0	0	0	0	0	0	0	0	0	0	0	0	0	0	0	0	0	0	0	0	0	0	1	0	0	0	0	0	0	0	0	0	0	0	0	0	0	0	0
Na	W	none	Yb2O3	77.985	0.42	0.09	0.5	4.8	11.6	3_Literature	0	0	0	0	0	0	0	0	0	0	0	0	0	0	0	0	0	0	0	0	0	0	0	0	0	0	0	0	0	0	0	0	0	0	0	0	0	0	0
none	none	none	ZnO	74.985	0.08	0.04	0.9	2	2.9	3_Literature	0	0	0	0	0	0	0	0	0	0	0	0	0	0	0	0	0	0	0	0	0	0	0	0	0	0	0	0	0	0	0	0	0	0	0	0	0	0	0
Zn	none	none	Al2O3	74.985	0.08	0.04	0.9	2	5.6	3_Literature	0	0	1	0	0	0	0	0	0	0	0	0	0	0	0	0	0	0	0	0	0	0	0	0	0	0	0	0	0	0	0	0	0	0	0	0	0	0	0
Zn	none	none	SiO2	74.985	0.08	0.04	0.9	2	1.1	3_Literature	0	0	0	0	0	0	0	0	0	0	0	0	0	0	0	0	0	0	0	0	0	0	0	0	0	0	0	0	0	0	0	0	0	0	0	0	0	0	0
Pb	none	none	CaO	74.985	0.07	0.03	0.9	2	3.8	3_Literature	0	0	0	0	0	0	0	0	0	0	0	0	0	1	0	0	0	0	0	0	0	0	0	0	0	0	0	0	0	0	0	0	0	0	0	0	0	0	0
La	Pb	none	CaO	74.985	0.07	0.03	0.9	2	8.3	3_Literature	0	0	0	0	0	0	0	0	0	0	0	0	0	1	0	0	0	0	0	0	0	0	0	0	0	0	0	0	0	0	0	0	0	0	0	1	0	0	0
K	Pb	none	CaO	74.985	0.07	0.03	0.9	2	9	3_Literature	0	0	0	0	0	0	0	0	0	0	0	0	0	1	0	0	0	0	0	0	0	0	0	0	0	0	0	0	0	0	0	0	0	1	0	0	0	0	0
Li	Pb	none	CaO	74.985	0.07	0.03	0.9	2	12.2	3_Literature	0	0	0	0	0	0	0	0	0	0	0	0	0	1	0	0	0	0	0	0	0	0	0	0	0	0	0	0	0	0	0	0	0	0	0	0	0	1	0
none	none	none	Y2O3	74.985	0.7	0.17	0.1	4.1	4.7	3_Literature	0	0	0	0	0	0	0	0	0	0	0	0	0	0	0	0	0	0	0	0	0	0	0	0	0	0	0	0	0	0	0	0	0	0	0	0	0	0	0
Sr	none	none	Y2O3	74.985	0.7	0.17	0.1	4.1	6.4	3_Literature	0	0	0	0	0	0	0	0	0	0	0	0	0	0	0	0	0	0	0	0	0	0	0	0	0	0	0	0	0	0	0	0	0	0	0	0	0	0	0
Na	none	none	Y2O3	74.985	0.7	0.09	0.2	7.8	3.3	3_Literature	0	0	0	0	0	0	0	0	0	0	0	0	0	0	0	0	0	0	0	0	0	0	0	0	0	0	0	0	0	0	0	0	0	0	0	0	0	0	0
Na	none	none	Y2O3	74.985	0.7	0.1	0.2	7	3.2	3_Literature	0	0	0	0	0	0	0	0	0	0	0	0	0	0	0	0	0	0	0	0	0	0	0	0	0	0	0	0	0	0	0	0	0	0	0	0	0	0	0
none	none	none	ZrO2	74.985	0.17	0.08	0.8	2	0.8	3_Literature	0	0	0	0	0	0	0	0	0	0	0	0	0	0	0	0	0	0	0	0	0	0	0	0	0	0	0	0	0	0	0	0	0	0	0	0	0	0	0
Na	none	none	ZrO2	74.985	0.17	0.08	0.8	2	15.7	3_Literature	0	0	0	0	0	0	0	0	0	0	0	0	0	0	0	0	0	0	0	0	0	0	0	0	0	0	0	0	0	0	0	0	0	0	0	0	0	0	0
none	none	none	BaO	81.985	0.81	0.19	0	4.3	1.7	3_Literature	0	0	0	0	0	0	0	1	0	0	0	0	0	0	0	0	0	0	0	0	0	0	0	0	0	0	0	0	0	0	0	0	0	0	0	0	0	0	0
V	none	none	BaO	81.985	0.81	0.19	0	4.3	15.3	3_Literature	0	0	0	0	0	0	0	1	0	0	0	0	0	0	0	0	0	0	0	0	0	0	0	0	0	0	0	0	0	0	0	0	0	0	0	0	0	0	0
Ba	none	none	CaO	84.985	0.8	0.2	0	4	13.8	3_Literature	0	0	0	0	0	0	1	0	0	0	0	0	0	1	0	0	0	0	0	0	0	0	0	0	0	0	0	0	0	0	0	0	0	0	0	0	0	0	0
Ba	none	none	CaO	84.985	0.8	0.2	0	4	13.4	3_Literature	0	0	0	0	0	0	1	0	0	0	0	0	0	1	0	0	0	0	0	0	0	0	0	0	0	0	0	0	0	0	0	0	0	0	0	0	0	0	0
Ba	none	none	La2O3	81.985	0.85	0.15	0	5.7	13.7	3_Literature	0	0	0	0	0	0	1	0	0	0	0	0	0	0	0	0	0	0	0	0	0	0	0	0	0	0	0	0	0	0	0	0	0	0	0	0	1	0	0
Cu	none	none	La2O3	74.985	0.18	0.07	0.8	2.5	3.4	3_Literature	0	0	0	0	0	0	0	0	0	0	0	0	0	0	0	0	0	0	0	0	1	0	0	0	0	0	0	0	0	0	0	0	0	0	0	0	1	0	0
Ba	Cu	none	La2O3	74.985	0.18	0.09	0.7	1.9	5.1	3_Literature	0	0	0	0	0	0	1	0	0	0	0	0	0	0	0	0	0	0	0	0	1	0	0	0	0	0	0	0	0	0	0	0	0	0	0	0	1	0	0
none	none	none	La2O3	74.985	0.17	0.06	0.8	2.6	6.8	3_Literature	0	0	0	0	0	0	0	0	0	0	0	0	0	0	0	0	0	0	0	0	0	0	0	0	0	0	0	0	0	0	0	0	0	0	0	0	1	0	0
none	none	none	BaO	74.985	0.17	0.06	0.8	2.6	1.4	3_Literature	0	0	0	0	0	0	0	1	0	0	0	0	0	0	0	0	0	0	0	0	0	0	0	0	0	0	0	0	0	0	0	0	0	0	0	0	0	0	0
Ba	none	none	La2O3	74.985	0.17	0.06	0.8	2.6	8.5	3_Literature	0	0	0	0	0	0	1	0	0	0	0	0	0	0	0	0	0	0	0	0	0	0	0	0	0	0	0	0	0	0	0	0	0	0	0	0	1	0	0
Li	none	none	Fe2O3	72.685	0.67	0.33	0	2	2.8	3_Literature	0	0	0	0	0	0	0	0	0	0	0	0	0	0	0	0	0	0	0	0	0	0	0	0	0	0	0	1	0	0	0	0	0	0	0	0	0	1	0
K	Ni	none	CaO	70.485	0.3	0.12	0.6	2.5	18.3	3_Literature	0	0	0	0	0	0	0	0	0	0	0	0	0	1	0	0	0	0	0	0	0	0	0	0	0	0	0	0	0	0	0	0	0	1	0	0	0	0	0
Li	Ni	none	MgO	70.485	0.3	0.12	0.6	2.5	9.1	3_Literature	0	0	0	0	0	0	0	0	0	0	0	0	0	0	0	0	0	0	0	0	0	0	0	0	0	0	0	0	0	0	0	0	0	0	0	0	0	1	0
Na	Ni	none	MgO	70.485	0.3	0.12	0.6	2.5	4.9	3_Literature	0	0	0	0	0	0	0	0	0	0	0	0	0	0	0	0	0	0	0	0	0	0	0	0	0	0	0	0	0	0	0	0	0	0	0	0	0	0	0
K	Ni	none	MgO	70.485	0.3	0.12	0.6	2.5	6.7	3_Literature	0	0	0	0	0	0	0	0	0	0	0	0	0	0	0	0	0	0	0	0	0	0	0	0	0	0	0	0	0	0	0	0	0	1	0	0	0	0	0
Zn	none	none	Al2O3	74.985	0.08	0.04	0.9	2	5.4	3_Literature	0	0	1	0	0	0	0	0	0	0	0	0	0	0	0	0	0	0	0	0	0	0	0	0	0	0	0	0	0	0	0	0	0	0	0	0	0	0	0
none	none	none	MgO	79.985	0.89	0.11	0	8.1	3.2	3_Literature	0	0	0	0	0	0	0	0	0	0	0	0	0	0	0	0	0	0	0	0	0	0	0	0	0	0	0	0	0	0	0	0	0	0	0	0	0	0	0
La	none	none	MgO	79.985	0.89	0.11	0	8.1	11.6	3_Literature	0	0	0	0	0	0	0	0	0	0	0	0	0	0	0	0	0	0	0	0	0	0	0	0	0	0	0	0	0	0	0	0	0	0	0	1	0	0	0
Ce	none	none	MgO	79.985	0.89	0.11	0	8.1	12.9	3_Literature	0	0	0	0	0	0	0	0	0	0	0	0	0	0	0	1	0	0	0	0	0	0	0	0	0	0	0	0	0	0	0	0	0	0	0	0	0	0	0
Nd	none	none	MgO	79.985	0.89	0.11	0	8.1	7.5	3_Literature	0	0	0	0	0	0	0	0	0	0	0	0	0	0	0	0	0	0	0	0	0	0	0	0	0	0	0	0	0	0	0	0	0	0	0	0	0	0	0
Eu	none	none	MgO	79.985	0.89	0.11	0	8.1	9	3_Literature	0	0	0	0	0	0	0	0	0	0	0	0	0	0	0	0	0	0	0	0	0	0	0	0	1	0	0	0	0	0	0	0	0	0	0	0	0	0	0
Yb	none	none	MgO	79.985	0.89	0.11	0	8.1	4.9	3_Literature	0	0	0	0	0	0	0	0	0	0	0	0	0	0	0	0	0	0	0	0	0	0	0	0	0	0	0	0	0	0	0	0	0	0	0	0	0	0	0
La	none	none	MgO	79.985	0.89	0.11	0	8.1	12.4	3_Literature	0	0	0	0	0	0	0	0	0	0	0	0	0	0	0	0	0	0	0	0	0	0	0	0	0	0	0	0	0	0	0	0	0	0	0	1	0	0	0
Ce	none	none	MgO	79.985	0.89	0.11	0	8.1	13	3_Literature	0	0	0	0	0	0	0	0	0	0	0	0	0	0	0	1	0	0	0	0	0	0	0	0	0	0	0	0	0	0	0	0	0	0	0	0	0	0	0
Nd	none	none	MgO	79.985	0.89	0.11	0	8.1	10.1	3_Literature	0	0	0	0	0	0	0	0	0	0	0	0	0	0	0	0	0	0	0	0	0	0	0	0	0	0	0	0	0	0	0	0	0	0	0	0	0	0	0
Eu	none	none	MgO	79.985	0.89	0.11	0	8.1	13.4	3_Literature	0	0	0	0	0	0	0	0	0	0	0	0	0	0	0	0	0	0	0	0	0	0	0	0	1	0	0	0	0	0	0	0	0	0	0	0	0	0	0
Yb	none	none	MgO	79.985	0.89	0.11	0	8.1	5.7	3_Literature	0	0	0	0	0	0	0	0	0	0	0	0	0	0	0	0	0	0	0	0	0	0	0	0	0	0	0	0	0	0	0	0	0	0	0	0	0	0	0
Mg	none	none	Nd2O3	74.985	0.6	0.06	0.4	10	7	3_Literature	0	0	0	0	0	0	0	0	0	0	0	0	0	0	0	0	0	0	0	0	0	0	0	0	0	0	0	0	0	0	0	0	0	0	0	0	0	0	0
Ca	none	none	Nd2O3	74.985	0.6	0.06	0.4	10	7.5	3_Literature	0	0	0	0	0	0	0	0	0	0	0	0	1	0	0	0	0	0	0	0	0	0	0	0	0	0	0	0	0	0	0	0	0	0	0	0	0	0	0
Sr	none	none	Nd2O3	74.985	0.6	0.06	0.4	10	9.1	3_Literature	0	0	0	0	0	0	0	0	0	0	0	0	0	0	0	0	0	0	0	0	0	0	0	0	0	0	0	0	0	0	0	0	0	0	0	0	0	0	0
Ba	none	none	Nd2O3	74.985	0.6	0.06	0.4	10	8.2	3_Literature	0	0	0	0	0	0	1	0	0	0	0	0	0	0	0	0	0	0	0	0	0	0	0	0	0	0	0	0	0	0	0	0	0	0	0	0	0	0	0
none	none	none	Y2O3	79.985	0.75	0.15	0.1	5	8.6	3_Literature	0	0	0	0	0	0	0	0	0	0	0	0	0	0	0	0	0	0	0	0	0	0	0	0	0	0	0	0	0	0	0	0	0	0	0	0	0	0	0
Li	none	none	MgO	79.985	0.56	0.19	0.3	2.9	19.3	3_Literature	0	0	0	0	0	0	0	0	0	0	0	0	0	0	0	0	0	0	0	0	0	0	0	0	0	0	0	0	0	0	0	0	0	0	0	0	0	1	0
none	none	none	Bi2O3	86.985	0.56	0.19	0.3	2.9	4.5	3_Literature	0	0	0	0	0	0	0	0	0	0	0	1	0	0	0	0	0	0	0	0	0	0	0	0	0	0	0	0	0	0	0	0	0	0	0	0	0	0	0
Bi	none	none	Y2O3	84.985	0.56	0.19	0.3	2.9	18	3_Literature	0	0	0	0	0	0	0	0	0	0	1	0	0	0	0	0	0	0	0	0	0	0	0	0	0	0	0	0	0	0	0	0	0	0	0	0	0	0	0
none	none	none	Y2O3	74.985	0.56	0.19	0.3	2.9	13.5	3_Literature	0	0	0	0	0	0	0	0	0	0	0	0	0	0	0	0	0	0	0	0	0	0	0	0	0	0	0	0	0	0	0	0	0	0	0	0	0	0	0
none	none	none	CeO2	79.985	0.75	0.15	0.1	5	0.6	3_Literature	0	0	0	0	0	0	0	0	0	0	0	0	0	0	0	0	1	0	0	0	0	0	0	0	0	0	0	0	0	0	0	0	0	0	0	0	0	0	0
none	none	none	Pr2O3	79.985	0.75	0.15	0.1	5	5	3_Literature	0	0	0	0	0	0	0	0	0	0	0	0	0	0	0	0	0	0	0	0	0	0	0	0	0	0	0	0	0	0	0	0	0	0	0	0	0	0	0
none	none	none	Tb2O3	79.985	0.75	0.15	0.1	5	5.5	3_Literature	0	0	0	0	0	0	0	0	0	0	0	0	0	0	0	0	0	0	0	0	0	0	0	0	0	0	0	0	0	0	0	0	0	0	0	0	0	0	0
none	none	none	La2O3	79.985	0.5	0.1	0.4	5	8	3_Literature	0	0	0	0	0	0	0	0	0	0	0	0	0	0	0	0	0	0	0	0	0	0	0	0	0	0	0	0	0	0	0	0	0	0	0	0	1	0	0
Sr	La	none	ZrO2	79.985	0.5	0.1	0.4	5	14.9	3_Literature	0	0	0	0	0	0	0	0	0	0	0	0	0	0	0	0	0	0	0	0	0	0	0	0	0	0	0	0	0	0	0	0	0	0	0	1	0	0	0
none	none	none	ZrO2	77.485	0.5	0.08	0.4	6	3.2	3_Literature	0	0	0	0	0	0	0	0	0	0	0	0	0	0	0	0	0	0	0	0	0	0	0	0	0	0	0	0	0	0	0	0	0	0	0	0	0	0	0
none	none	none	Nd2O3	74.985	0.5	0.08	0.4	6	9.2	3_Literature	0	0	0	0	0	0	0	0	0	0	0	0	0	0	0	0	0	0	0	0	0	0	0	0	0	0	0	0	0	0	0	0	0	0	0	0	0	0	0
Ni	none	none	Nd2O3	64.985	0.5	0.08	0.4	6	11.4	3_Literature	0	0	0	0	0	0	0	0	0	0	0	0	0	0	0	0	0	0	0	0	0	0	0	0	0	0	0	0	0	0	0	0	0	0	0	0	0	0	0
Mn	none	none	Nd2O3	71.985	0.5	0.08	0.4	6	11.9	3_Literature	0	0	0	0	0	0	0	0	0	0	0	0	0	0	0	0	0	0	0	0	0	0	0	0	0	0	0	0	0	0	0	0	0	0	0	0	0	0	0
Zr	none	none	Nd2O3	74.985	0.5	0.08	0.4	6	11.6	3_Literature	0	0	0	0	0	0	0	0	0	0	0	0	0	0	0	0	0	0	0	0	0	0	0	0	0	0	0	0	0	0	0	0	0	0	0	0	0	0	0
Ba	none	none	SiO2	77.485	0.29	0.03	0.7	8.8	0.6	3_Literature	0	0	0	0	0	0	1	0	0	0	0	0	0	0	0	0	0	0	0	0	0	0	0	0	0	0	0	0	0	0	0	0	0	0	0	0	0	0	0
Cs	none	none	SiO2	77.485	0.29	0.03	0.7	8.8	0.5	3_Literature	0	0	0	0	0	0	0	0	0	0	0	0	0	0	0	0	0	0	0	1	0	0	0	0	0	0	0	0	0	0	0	0	0	0	0	0	0	0	0
Co	none	none	SiO2	77.485	0.29	0.03	0.7	8.8	0.7	3_Literature	0	0	0	0	0	0	0	0	0	0	0	0	0	0	0	0	0	1	0	0	0	0	0	0	0	0	0	0	0	0	0	0	0	0	0	0	0	0	0
none	none	none	ZrO2	79.985	0.15	0.05	0.8	3	2.9	3_Literature	0	0	0	0	0	0	0	0	0	0	0	0	0	0	0	0	0	0	0	0	0	0	0	0	0	0	0	0	0	0	0	0	0	0	0	0	0	0	0
Li	none	none	ZrO2	79.985	0.15	0.05	0.8	3	8.6	3_Literature	0	0	0	0	0	0	0	0	0	0	0	0	0	0	0	0	0	0	0	0	0	0	0	0	0	0	0	0	0	0	0	0	0	0	0	0	0	1	0
Y	none	none	Bi2O3	89.985	0.3	0.1	0.6	3	17	3_Literature	0	0	0	0	0	0	0	0	0	0	0	1	0	0	0	0	0	0	0	0	0	0	0	0	0	0	0	0	0	0	0	0	0	0	0	0	0	0	0
Sr	none	none	La2O3	79.985	0.8	0.2	0	4	16.2	3_Literature	0	0	0	0	0	0	0	0	0	0	0	0	0	0	0	0	0	0	0	0	0	0	0	0	0	0	0	0	0	0	0	0	0	0	0	0	1	0	0
Li	none	none	MgO	79.985	0.3	0.1	0.6	3	19.3	3_Literature	0	0	0	0	0	0	0	0	0	0	0	0	0	0	0	0	0	0	0	0	0	0	0	0	0	0	0	0	0	0	0	0	0	0	0	0	0	1	0
none	none	none	Pr2O3	84.985	0.55	0.16	0.3	3.4	4.2	3_Literature	0	0	0	0	0	0	0	0	0	0	0	0	0	0	0	0	0	0	0	0	0	0	0	0	0	0	0	0	0	0	0	0	0	0	0	0	0	0	0
Ca	La	none	MgO	79.985	0.89	0.11	0	8.1	14.5	3_Literature	0	0	0	0	0	0	0	0	0	0	0	0	1	0	0	0	0	0	0	0	0	0	0	0	0	0	0	0	0	0	0	0	0	0	0	1	0	0	0
Ca	La	none	MgO	79.985	0.89	0.11	0	8.1	14.7	3_Literature	0	0	0	0	0	0	0	0	0	0	0	0	1	0	0	0	0	0	0	0	0	0	0	0	0	0	0	0	0	0	0	0	0	0	0	1	0	0	0
Ca	La	none	MgO	79.985	0.89	0.11	0	8.1	15.2	3_Literature	0	0	0	0	0	0	0	0	0	0	0	0	1	0	0	0	0	0	0	0	0	0	0	0	0	0	0	0	0	0	0	0	0	0	0	1	0	0	0
Ca	La	none	MgO	79.985	0.89	0.11	0	8.1	15.9	3_Literature	0	0	0	0	0	0	0	0	0	0	0	0	1	0	0	0	0	0	0	0	0	0	0	0	0	0	0	0	0	0	0	0	0	0	0	1	0	0	0
Ba	La	none	MgO	79.985	0.89	0.11	0	8.1	14.9	3_Literature	0	0	0	0	0	0	1	0	0	0	0	0	0	0	0	0	0	0	0	0	0	0	0	0	0	0	0	0	0	0	0	0	0	0	0	1	0	0	0
Ba	La	none	MgO	79.985	0.89	0.11	0	8.1	14	3_Literature	0	0	0	0	0	0	1	0	0	0	0	0	0	0	0	0	0	0	0	0	0	0	0	0	0	0	0	0	0	0	0	0	0	0	0	1	0	0	0
Ba	La	none	MgO	79.985	0.89	0.11	0	8.1	13.8	3_Literature	0	0	0	0	0	0	1	0	0	0	0	0	0	0	0	0	0	0	0	0	0	0	0	0	0	0	0	0	0	0	0	0	0	0	0	1	0	0	0
Ba	La	none	MgO	79.985	0.89	0.11	0	8.1	15.7	3_Literature	0	0	0	0	0	0	1	0	0	0	0	0	0	0	0	0	0	0	0	0	0	0	0	0	0	0	0	0	0	0	0	0	0	0	0	1	0	0	0
Ba	La	none	MgO	79.985	0.89	0.11	0	8.1	15.3	3_Literature	0	0	0	0	0	0	1	0	0	0	0	0	0	0	0	0	0	0	0	0	0	0	0	0	0	0	0	0	0	0	0	0	0	0	0	1	0	0	0
none	La	none	MgO	79.985	0.89	0.11	0	8.1	12	3_Literature	0	0	0	0	0	0	0	0	0	0	0	0	0	0	0	0	0	0	0	0	0	0	0	0	0	0	0	0	0	0	0	0	0	0	0	1	0	0	0
Li	none	none	MgO	74.985	0.8	0.2	0	4	17.7	3_Literature	0	0	0	0	0	0	0	0	0	0	0	0	0	0	0	0	0	0	0	0	0	0	0	0	0	0	0	0	0	0	0	0	0	0	0	0	0	1	0
Na	none	none	MgO	74.985	0.8	0.2	0	4	15.6	3_Literature	0	0	0	0	0	0	0	0	0	0	0	0	0	0	0	0	0	0	0	0	0	0	0	0	0	0	0	0	0	0	0	0	0	0	0	0	0	0	0
K	none	none	MgO	74.985	0.8	0.2	0	4	7.8	3_Literature	0	0	0	0	0	0	0	0	0	0	0	0	0	0	0	0	0	0	0	0	0	0	0	0	0	0	0	0	0	0	0	0	0	1	0	0	0	0	0
Rb	none	none	MgO	74.985	0.8	0.2	0	4	6.2	3_Literature	0	0	0	0	0	0	0	0	0	0	0	0	0	0	0	0	0	0	0	0	0	0	0	0	0	0	0	0	0	0	0	0	0	0	0	0	0	0	0
Cs	none	none	MgO	74.985	0.8	0.2	0	4	2.2	3_Literature	0	0	0	0	0	0	0	0	0	0	0	0	0	0	0	0	0	0	0	1	0	0	0	0	0	0	0	0	0	0	0	0	0	0	0	0	0	0	0
none	W	none	Bi2O3	82.485	0.38	0.13	0.5	3	12	3_Literature	0	0	0	0	0	0	0	0	0	0	0	1	0	0	0	0	0	0	0	0	0	0	0	0	0	0	0	0	0	0	0	0	0	0	0	0	0	0	0
Na	none	none	MgO	89.985	0.8	0.2	0	4	13	3_Literature	0	0	0	0	0	0	0	0	0	0	0	0	0	0	0	0	0	0	0	0	0	0	0	0	0	0	0	0	0	0	0	0	0	0	0	0	0	0	0
none	none	none	MgO	89.985	0.8	0.2	0	4	8.2	3_Literature	0	0	0	0	0	0	0	0	0	0	0	0	0	0	0	0	0	0	0	0	0	0	0	0	0	0	0	0	0	0	0	0	0	0	0	0	0	0	0
Mg	none	none	BaO	77.985	0.8	0.2	0	4	10.3	3_Literature	0	0	0	0	0	0	0	1	0	0	0	0	0	0	0	0	0	0	0	0	0	0	0	0	0	0	0	0	0	0	0	0	0	0	0	0	0	0	0
none	none	none	Gd2O3	74.985	0.17	0.07	0.8	2.5	12	3_Literature	0	0	0	0	0	0	0	0	0	0	0	0	0	0	0	0	0	0	0	0	0	0	0	0	0	0	0	0	0	1	0	0	0	0	0	0	0	0	0
none	none	none	CaO	82.985	0.07	0.03	0.9	2	14.6	3_Literature	0	0	0	0	0	0	0	0	0	0	0	0	0	1	0	0	0	0	0	0	0	0	0	0	0	0	0	0	0	0	0	0	0	0	0	0	0	0	0
La	none	none	CaO	82.985	0.07	0.03	0.9	2	15.3	3_Literature	0	0	0	0	0	0	0	0	0	0	0	0	0	1	0	0	0	0	0	0	0	0	0	0	0	0	0	0	0	0	0	0	0	0	0	1	0	0	0
Sr	La	none	CaO	82.985	0.07	0.03	0.9	2	18.1	3_Literature	0	0	0	0	0	0	0	0	0	0	0	0	0	1	0	0	0	0	0	0	0	0	0	0	0	0	0	0	0	0	0	0	0	0	0	1	0	0	0
none	none	none	Nd2O3	74.985	0.75	0.15	0.1	5	10.7	3_Literature	0	0	0	0	0	0	0	0	0	0	0	0	0	0	0	0	0	0	0	0	0	0	0	0	0	0	0	0	0	0	0	0	0	0	0	0	0	0	0
none	none	none	La2O3	79.985	0.8	0.2	0	4	14.1	3_Literature	0	0	0	0	0	0	0	0	0	0	0	0	0	0	0	0	0	0	0	0	0	0	0	0	0	0	0	0	0	0	0	0	0	0	0	0	1	0	0
Sr	none	none	La2O3	79.985	0.8	0.2	0	4	17.2	3_Literature	0	0	0	0	0	0	0	0	0	0	0	0	0	0	0	0	0	0	0	0	0	0	0	0	0	0	0	0	0	0	0	0	0	0	0	0	1	0	0
none	none	none	Sm2O3	79.985	0.8	0.2	0	4	12.4	3_Literature	0	0	0	0	0	0	0	0	0	0	0	0	0	0	0	0	0	0	0	0	0	0	0	0	0	0	0	0	0	0	0	0	0	0	0	0	0	0	0
Sr	none	none	Sm2O3	79.985	0.8	0.2	0	4	14.4	3_Literature	0	0	0	0	0	0	0	0	0	0	0	0	0	0	0	0	0	0	0	0	0	0	0	0	0	0	0	0	0	0	0	0	0	0	0	0	0	0	0
none	none	none	Yb2O3	79.985	0.8	0.2	0	4	4.8	3_Literature	0	0	0	0	0	0	0	0	0	0	0	0	0	0	0	0	0	0	0	0	0	0	0	0	0	0	0	0	0	0	0	0	0	0	0	0	0	0	0
Sr	none	none	Yb2O3	79.985	0.8	0.2	0	4	13.2	3_Literature	0	0	0	0	0	0	0	0	0	0	0	0	0	0	0	0	0	0	0	0	0	0	0	0	0	0	0	0	0	0	0	0	0	0	0	0	0	0	0
Sr	none	none	CeO2	79.985	0.8	0.2	0	4	9.8	3_Literature	0	0	0	0	0	0	0	0	0	0	0	0	0	0	0	0	1	0	0	0	0	0	0	0	0	0	0	0	0	0	0	0	0	0	0	0	0	0	0
Sr	none	none	Pr2O3	79.985	0.8	0.2	0	4	10	3_Literature	0	0	0	0	0	0	0	0	0	0	0	0	0	0	0	0	0	0	0	0	0	0	0	0	0	0	0	0	0	0	0	0	0	0	0	0	0	0	0
Sr	none	none	Nd2O3	79.985	0.8	0.2	0	4	13.8	3_Literature	0	0	0	0	0	0	0	0	0	0	0	0	0	0	0	0	0	0	0	0	0	0	0	0	0	0	0	0	0	0	0	0	0	0	0	0	0	0	0
Sr	none	none	Gd2O3	79.985	0.8	0.2	0	4	13.8	3_Literature	0	0	0	0	0	0	0	0	0	0	0	0	0	0	0	0	0	0	0	0	0	0	0	0	0	0	0	0	0	1	0	0	0	0	0	0	0	0	0
Sr	none	none	Dy2O3	79.985	0.8	0.2	0	4	5	3_Literature	0	0	0	0	0	0	0	0	0	0	0	0	0	0	0	0	0	0	0	0	0	0	1	0	0	0	0	0	0	0	0	0	0	0	0	0	0	0	0
none	none	none	Y2O3	74.985	0.17	0.07	0.8	2.5	7.9	3_Literature	0	0	0	0	0	0	0	0	0	0	0	0	0	0	0	0	0	0	0	0	0	0	0	0	0	0	0	0	0	0	0	0	0	0	0	0	0	0	0
none	none	none	Nd2O3	74.985	0.17	0.07	0.8	2.5	9.4	3_Literature	0	0	0	0	0	0	0	0	0	0	0	0	0	0	0	0	0	0	0	0	0	0	0	0	0	0	0	0	0	0	0	0	0	0	0	0	0	0	0
Ba	none	none	Nd2O3	74.985	0.17	0.07	0.8	2.5	16.3	3_Literature	0	0	0	0	0	0	1	0	0	0	0	0	0	0	0	0	0	0	0	0	0	0	0	0	0	0	0	0	0	0	0	0	0	0	0	0	0	0	0
Mn	Na	W	SiO2	84.985	0.16	0.04	0.8	4.6	26.4	3_Literature	0	0	0	0	0	0	0	0	0	0	0	0	0	0	0	0	0	0	0	0	0	0	0	0	0	0	0	0	0	0	0	0	0	0	0	0	0	0	0
Na	W	none	SiO2	84.985	0.16	0.04	0.8	4.6	22.9	3_Literature	0	0	0	0	0	0	0	0	0	0	0	0	0	0	0	0	0	0	0	0	0	0	0	0	0	0	0	0	0	0	0	0	0	0	0	0	0	0	0
Mn	W	none	SiO2	84.985	0.16	0.04	0.8	4.6	8	3_Literature	0	0	0	0	0	0	0	0	0	0	0	0	0	0	0	0	0	0	0	0	0	0	0	0	0	0	0	0	0	0	0	0	0	0	0	0	0	0	0
Mn	none	none	SiO2	84.985	0.16	0.04	0.8	4.6	5.3	3_Literature	0	0	0	0	0	0	0	0	0	0	0	0	0	0	0	0	0	0	0	0	0	0	0	0	0	0	0	0	0	0	0	0	0	0	0	0	0	0	0
W	none	none	SiO2	84.985	0.16	0.04	0.8	4.6	2.4	3_Literature	0	0	0	0	0	0	0	0	0	0	0	0	0	0	0	0	0	0	0	0	0	0	0	0	0	0	0	0	0	0	0	0	0	0	0	0	0	0	0
none	none	none	Nd2O3	74.985	0.6	0.06	0.4	10	5.5	3_Literature	0	0	0	0	0	0	0	0	0	0	0	0	0	0	0	0	0	0	0	0	0	0	0	0	0	0	0	0	0	0	0	0	0	0	0	0	0	0	0
Sr	none	none	Nd2O3	74.985	0.6	0.06	0.4	10	8	3_Literature	0	0	0	0	0	0	0	0	0	0	0	0	0	0	0	0	0	0	0	0	0	0	0	0	0	0	0	0	0	0	0	0	0	0	0	0	0	0	0
Mn	Na	W	SiO2	74.985	0.22	0.03	0.8	7.4	2.1	3_Literature	0	0	0	0	0	0	0	0	0	0	0	0	0	0	0	0	0	0	0	0	0	0	0	0	0	0	0	0	0	0	0	0	0	0	0	0	0	0	0
Na	none	none	CaO	79.985	0.8	0.2	0	4	18	3_Literature	0	0	0	0	0	0	0	0	0	0	0	0	0	1	0	0	0	0	0	0	0	0	0	0	0	0	0	0	0	0	0	0	0	0	0	0	0	0	0
Na	none	none	CaO	79.985	0.8	0.2	0	4	17.5	3_Literature	0	0	0	0	0	0	0	0	0	0	0	0	0	1	0	0	0	0	0	0	0	0	0	0	0	0	0	0	0	0	0	0	0	0	0	0	0	0	0
Na	none	none	CaO	79.985	0.8	0.2	0	4	17.9	3_Literature	0	0	0	0	0	0	0	0	0	0	0	0	0	1	0	0	0	0	0	0	0	0	0	0	0	0	0	0	0	0	0	0	0	0	0	0	0	0	0
Ce	none	none	CaO	79.985	0.8	0.2	0	4	11.9	3_Literature	0	0	0	0	0	0	0	0	0	0	0	0	0	1	0	1	0	0	0	0	0	0	0	0	0	0	0	0	0	0	0	0	0	0	0	0	0	0	0
Ce	Na	none	CaO	79.985	0.8	0.2	0	4	18.3	3_Literature	0	0	0	0	0	0	0	0	0	0	0	0	0	1	0	1	0	0	0	0	0	0	0	0	0	0	0	0	0	0	0	0	0	0	0	0	0	0	0
Ce	Na	none	CaO	79.985	0.8	0.2	0	4	17.7	3_Literature	0	0	0	0	0	0	0	0	0	0	0	0	0	1	0	1	0	0	0	0	0	0	0	0	0	0	0	0	0	0	0	0	0	0	0	0	0	0	0
Ce	Na	none	CaO	79.985	0.8	0.2	0	4	17.1	3_Literature	0	0	0	0	0	0	0	0	0	0	0	0	0	1	0	1	0	0	0	0	0	0	0	0	0	0	0	0	0	0	0	0	0	0	0	0	0	0	0
Ce	Na	none	CaO	79.985	0.8	0.2	0	4	17.2	3_Literature	0	0	0	0	0	0	0	0	0	0	0	0	0	1	0	1	0	0	0	0	0	0	0	0	0	0	0	0	0	0	0	0	0	0	0	0	0	0	0
Mn	none	none	SiO2	79.985	0.8	0.2	0	4	2.6	3_Literature	0	0	0	0	0	0	0	0	0	0	0	0	0	0	0	0	0	0	0	0	0	0	0	0	0	0	0	0	0	0	0	0	0	0	0	0	0	0	0
Mn	K	none	Al2O3	79.985	0.8	0.2	0	4	4	3_Literature	0	0	1	0	0	0	0	0	0	0	0	0	0	0	0	0	0	0	0	0	0	0	0	0	0	0	0	0	0	0	0	0	0	1	0	0	0	0	0
none	none	none	La2O3	69.985	0.75	0.15	0.1	5	10.9	3_Literature	0	0	0	0	0	0	0	0	0	0	0	0	0	0	0	0	0	0	0	0	0	0	0	0	0	0	0	0	0	0	0	0	0	0	0	0	1	0	0
none	none	none	Nd2O3	74.985	0.75	0.15	0.1	5	10.7	3_Literature	0	0	0	0	0	0	0	0	0	0	0	0	0	0	0	0	0	0	0	0	0	0	0	0	0	0	0	0	0	0	0	0	0	0	0	0	0	0	0
none	none	none	Sm2O3	79.985	0.75	0.15	0.1	5	10.2	3_Literature	0	0	0	0	0	0	0	0	0	0	0	0	0	0	0	0	0	0	0	0	0	0	0	0	0	0	0	0	0	0	0	0	0	0	0	0	0	0	0
none	none	none	Eu2O3	74.985	0.75	0.15	0.1	5	8.7	3_Literature	0	0	0	0	0	0	0	0	0	0	0	0	0	0	0	0	0	0	0	0	0	0	0	0	0	1	0	0	0	0	0	0	0	0	0	0	0	0	0
none	none	none	Gd2O3	74.985	0.75	0.15	0.1	5	9.9	3_Literature	0	0	0	0	0	0	0	0	0	0	0	0	0	0	0	0	0	0	0	0	0	0	0	0	0	0	0	0	0	1	0	0	0	0	0	0	0	0	0
none	none	none	Dy2O3	74.985	0.75	0.15	0.1	5	13.3	3_Literature	0	0	0	0	0	0	0	0	0	0	0	0	0	0	0	0	0	0	0	0	0	0	1	0	0	0	0	0	0	0	0	0	0	0	0	0	0	0	0
none	none	none	Yb2O3	74.985	0.75	0.15	0.1	5	9	3_Literature	0	0	0	0	0	0	0	0	0	0	0	0	0	0	0	0	0	0	0	0	0	0	0	0	0	0	0	0	0	0	0	0	0	0	0	0	0	0	0
none	none	none	La2O3	79.985	0.8	0.2	0	4	13.1	3_Literature	0	0	0	0	0	0	0	0	0	0	0	0	0	0	0	0	0	0	0	0	0	0	0	0	0	0	0	0	0	0	0	0	0	0	0	0	1	0	0
none	none	none	Nd2O3	79.985	0.8	0.2	0	4	5.2	3_Literature	0	0	0	0	0	0	0	0	0	0	0	0	0	0	0	0	0	0	0	0	0	0	0	0	0	0	0	0	0	0	0	0	0	0	0	0	0	0	0
Li	none	none	MgO	89.985	0.5	0.21	0.3	2.4	14	3_Literature	0	0	0	0	0	0	0	0	0	0	0	0	0	0	0	0	0	0	0	0	0	0	0	0	0	0	0	0	0	0	0	0	0	0	0	0	0	1	0
Li	none	none	MgO	89.985	0.5	0.21	0.3	2.4	12.4	3_Literature	0	0	0	0	0	0	0	0	0	0	0	0	0	0	0	0	0	0	0	0	0	0	0	0	0	0	0	0	0	0	0	0	0	0	0	0	0	1	0
Na	none	none	MgO	89.985	0.5	0.21	0.3	2.4	12.5	3_Literature	0	0	0	0	0	0	0	0	0	0	0	0	0	0	0	0	0	0	0	0	0	0	0	0	0	0	0	0	0	0	0	0	0	0	0	0	0	0	0
K	none	none	MgO	89.985	0.5	0.21	0.3	2.4	9	3_Literature	0	0	0	0	0	0	0	0	0	0	0	0	0	0	0	0	0	0	0	0	0	0	0	0	0	0	0	0	0	0	0	0	0	1	0	0	0	0	0
Na	none	none	SiO2	89.985	0.5	0.21	0.3	2.4	5.5	3_Literature	0	0	0	0	0	0	0	0	0	0	0	0	0	0	0	0	0	0	0	0	0	0	0	0	0	0	0	0	0	0	0	0	0	0	0	0	0	0	0
Li	none	none	SiO2	89.985	0.5	0.21	0.3	2.4	5.6	3_Literature	0	0	0	0	0	0	0	0	0	0	0	0	0	0	0	0	0	0	0	0	0	0	0	0	0	0	0	0	0	0	0	0	0	0	0	0	0	1	0
Li	none	none	Al2O3	89.985	0.5	0.21	0.3	2.4	6.2	3_Literature	0	0	1	0	0	0	0	0	0	0	0	0	0	0	0	0	0	0	0	0	0	0	0	0	0	0	0	0	0	0	0	0	0	0	0	0	0	1	0
Li	none	none	TiO2	89.985	0.5	0.21	0.3	2.4	9.7	3_Literature	0	0	0	0	0	0	0	0	0	0	0	0	0	0	0	0	0	0	0	0	0	0	0	0	0	0	0	0	0	0	0	0	0	0	0	0	0	1	0
none	none	none	MgO	89.985	0.5	0.21	0.3	2.4	10.1	3_Literature	0	0	0	0	0	0	0	0	0	0	0	0	0	0	0	0	0	0	0	0	0	0	0	0	0	0	0	0	0	0	0	0	0	0	0	0	0	0	0
none	none	none	SiO2	89.985	0.5	0.21	0.3	2.4	3	3_Literature	0	0	0	0	0	0	0	0	0	0	0	0	0	0	0	0	0	0	0	0	0	0	0	0	0	0	0	0	0	0	0	0	0	0	0	0	0	0	0
none	none	none	Al2O3	89.985	0.5	0.21	0.3	2.4	1.5	3_Literature	0	0	1	0	0	0	0	0	0	0	0	0	0	0	0	0	0	0	0	0	0	0	0	0	0	0	0	0	0	0	0	0	0	0	0	0	0	0	0
none	none	none	SiO2	84.985	0.09	0.02	0.9	4.5	3.9	3_Literature	0	0	0	0	0	0	0	0	0	0	0	0	0	0	0	0	0	0	0	0	0	0	0	0	0	0	0	0	0	0	0	0	0	0	0	0	0	0	0
Li	none	none	SiO2	84.985	0.09	0.02	0.9	4.5	0	3_Literature	0	0	0	0	0	0	0	0	0	0	0	0	0	0	0	0	0	0	0	0	0	0	0	0	0	0	0	0	0	0	0	0	0	0	0	0	0	1	0
Na	none	none	SiO2	84.985	0.09	0.02	0.9	4.5	0	3_Literature	0	0	0	0	0	0	0	0	0	0	0	0	0	0	0	0	0	0	0	0	0	0	0	0	0	0	0	0	0	0	0	0	0	0	0	0	0	0	0
K	none	none	SiO2	84.985	0.09	0.02	0.9	4.5	0	3_Literature	0	0	0	0	0	0	0	0	0	0	0	0	0	0	0	0	0	0	0	0	0	0	0	0	0	0	0	0	0	0	0	0	0	1	0	0	0	0	0
Rb	none	none	SiO2	84.985	0.09	0.02	0.9	4.5	0.2	3_Literature	0	0	0	0	0	0	0	0	0	0	0	0	0	0	0	0	0	0	0	0	0	0	0	0	0	0	0	0	0	0	0	0	0	0	0	0	0	0	0
Cs	none	none	SiO2	84.985	0.09	0.02	0.9	4.5	0.5	3_Literature	0	0	0	0	0	0	0	0	0	0	0	0	0	0	0	0	0	0	0	1	0	0	0	0	0	0	0	0	0	0	0	0	0	0	0	0	0	0	0
Mg	none	none	SiO2	84.985	0.09	0.02	0.9	4.5	3	3_Literature	0	0	0	0	0	0	0	0	0	0	0	0	0	0	0	0	0	0	0	0	0	0	0	0	0	0	0	0	0	0	0	0	0	0	0	0	0	0	0
Ca	none	none	SiO2	84.985	0.09	0.02	0.9	4.5	3.2	3_Literature	0	0	0	0	0	0	0	0	0	0	0	0	1	0	0	0	0	0	0	0	0	0	0	0	0	0	0	0	0	0	0	0	0	0	0	0	0	0	0
Na	W	none	SiO2	84.985	0.09	0.02	0.9	4.5	22.9	3_Literature	0	0	0	0	0	0	0	0	0	0	0	0	0	0	0	0	0	0	0	0	0	0	0	0	0	0	0	0	0	0	0	0	0	0	0	0	0	0	0
K	W	none	SiO2	84.985	0.09	0.02	0.9	4.5	20.1	3_Literature	0	0	0	0	0	0	0	0	0	0	0	0	0	0	0	0	0	0	0	0	0	0	0	0	0	0	0	0	0	0	0	0	0	1	0	0	0	0	0
Rb	W	none	SiO2	84.985	0.09	0.02	0.9	4.5	25	3_Literature	0	0	0	0	0	0	0	0	0	0	0	0	0	0	0	0	0	0	0	0	0	0	0	0	0	0	0	0	0	0	0	0	0	0	0	0	0	0	0
Cs	W	none	SiO2	84.985	0.09	0.02	0.9	4.5	18.1	3_Literature	0	0	0	0	0	0	0	0	0	0	0	0	0	0	0	0	0	0	0	1	0	0	0	0	0	0	0	0	0	0	0	0	0	0	0	0	0	0	0
Li	W	none	SiO2	84.985	0.09	0.02	0.9	4.5	9.7	3_Literature	0	0	0	0	0	0	0	0	0	0	0	0	0	0	0	0	0	0	0	0	0	0	0	0	0	0	0	0	0	0	0	0	0	0	0	0	0	1	0
Ca	W	none	SiO2	84.985	0.09	0.02	0.9	4.5	4	3_Literature	0	0	0	0	0	0	0	0	0	0	0	0	1	0	0	0	0	0	0	0	0	0	0	0	0	0	0	0	0	0	0	0	0	0	0	0	0	0	0
Mg	W	none	SiO2	84.985	0.09	0.02	0.9	4.5	4	3_Literature	0	0	0	0	0	0	0	0	0	0	0	0	0	0	0	0	0	0	0	0	0	0	0	0	0	0	0	0	0	0	0	0	0	0	0	0	0	0	0
none	none	none	CaO	69.985	0.5	0.1	0.4	5	0.8	3_Literature	0	0	0	0	0	0	0	0	0	0	0	0	0	1	0	0	0	0	0	0	0	0	0	0	0	0	0	0	0	0	0	0	0	0	0	0	0	0	0
Na	none	none	CaO	69.985	0.5	0.1	0.4	5	3.1	3_Literature	0	0	0	0	0	0	0	0	0	0	0	0	0	1	0	0	0	0	0	0	0	0	0	0	0	0	0	0	0	0	0	0	0	0	0	0	0	0	0
Ni	none	none	La2O3	64.985	0.83	0.17	0	5	0	3_Literature	0	0	0	0	0	0	0	0	0	0	0	0	0	0	0	0	0	0	0	0	0	0	0	0	0	0	0	0	0	0	0	0	0	0	0	0	1	0	0
Ni	none	none	Sm2O3	54.985	0.83	0.17	0	5	3.5	3_Literature	0	0	0	0	0	0	0	0	0	0	0	0	0	0	0	0	0	0	0	0	0	0	0	0	0	0	0	0	0	0	0	0	0	0	0	0	0	0	0
Ni	none	none	CeO2	54.985	0.83	0.17	0	5	15.5	3_Literature	0	0	0	0	0	0	0	0	0	0	0	0	0	0	0	0	1	0	0	0	0	0	0	0	0	0	0	0	0	0	0	0	0	0	0	0	0	0	0
La	none	none	MgO	74.985	0.8	0.2	0	4	17	3_Literature	0	0	0	0	0	0	0	0	0	0	0	0	0	0	0	0	0	0	0	0	0	0	0	0	0	0	0	0	0	0	0	0	0	0	0	1	0	0	0
Li	none	none	MgO	89.985	0.09	0.02	0.9	4.1	24.3	3_Literature	0	0	0	0	0	0	0	0	0	0	0	0	0	0	0	0	0	0	0	0	0	0	0	0	0	0	0	0	0	0	0	0	0	0	0	0	0	1	0
Li	none	none	MgO	74.985	0.75	0.25	0	3	21.7	3_Literature	0	0	0	0	0	0	0	0	0	0	0	0	0	0	0	0	0	0	0	0	0	0	0	0	0	0	0	0	0	0	0	0	0	0	0	0	0	1	0
W	none	none	SiO2	64.985	0.9	0.1	0	9	0.1	3_Literature	0	0	0	0	0	0	0	0	0	0	0	0	0	0	0	0	0	0	0	0	0	0	0	0	0	0	0	0	0	0	0	0	0	0	0	0	0	0	0
K	W	none	SiO2	64.985	0.9	0.1	0	9	0.5	3_Literature	0	0	0	0	0	0	0	0	0	0	0	0	0	0	0	0	0	0	0	0	0	0	0	0	0	0	0	0	0	0	0	0	0	1	0	0	0	0	0
K	W	none	TiO2	64.985	0.9	0.1	0	9	0.2	3_Literature	0	0	0	0	0	0	0	0	0	0	0	0	0	0	0	0	0	0	0	0	0	0	0	0	0	0	0	0	0	0	0	0	0	1	0	0	0	0	0
K	W	none	Al2O3	64.985	0.9	0.1	0	9	0	3_Literature	0	0	1	0	0	0	0	0	0	0	0	0	0	0	0	0	0	0	0	0	0	0	0	0	0	0	0	0	0	0	0	0	0	1	0	0	0	0	0
K	W	none	MgO	64.985	0.9	0.1	0	9	0.1	3_Literature	0	0	0	0	0	0	0	0	0	0	0	0	0	0	0	0	0	0	0	0	0	0	0	0	0	0	0	0	0	0	0	0	0	1	0	0	0	0	0
Sm	Y	none	Bi2O3	94.985	0.33	0.17	0.5	2	26.7	3_Literature	0	0	0	0	0	0	0	0	0	0	0	1	0	0	0	0	0	0	0	0	0	0	0	0	0	0	0	0	0	0	0	0	0	0	0	0	0	0	0
Sr	none	none	La2O3	64.985	0.78	0.22	0	3.6	12	3_Literature	0	0	0	0	0	0	0	0	0	0	0	0	0	0	0	0	0	0	0	0	0	0	0	0	0	0	0	0	0	0	0	0	0	0	0	0	1	0	0
Sr	Ni	none	La2O3	64.985	0.78	0.22	0	3.6	0.8	3_Literature	0	0	0	0	0	0	0	0	0	0	0	0	0	0	0	0	0	0	0	0	0	0	0	0	0	0	0	0	0	0	0	0	0	0	0	0	1	0	0
none	none	none	SiO2	77.685	0.88	0.12	0	7.5	0	3_Literature	0	0	0	0	0	0	0	0	0	0	0	0	0	0	0	0	0	0	0	0	0	0	0	0	0	0	0	0	0	0	0	0	0	0	0	0	0	0	0
Mn	none	none	SiO2	77.685	0.88	0.12	0	7.5	0	3_Literature	0	0	0	0	0	0	0	0	0	0	0	0	0	0	0	0	0	0	0	0	0	0	0	0	0	0	0	0	0	0	0	0	0	0	0	0	0	0	0
Na	W	none	SiO2	77.685	0.88	0.12	0	7.5	6.9	3_Literature	0	0	0	0	0	0	0	0	0	0	0	0	0	0	0	0	0	0	0	0	0	0	0	0	0	0	0	0	0	0	0	0	0	0	0	0	0	0	0
V	Na	W	SiO2	77.685	0.88	0.12	0	7.5	1.2	3_Literature	0	0	0	0	0	0	0	0	0	0	0	0	0	0	0	0	0	0	0	0	0	0	0	0	0	0	0	0	0	0	0	0	0	0	0	0	0	0	0
Cr	Na	W	SiO2	77.685	0.88	0.12	0	7.5	2.4	3_Literature	0	0	0	0	0	0	0	0	0	0	0	0	0	0	0	0	0	0	1	0	0	0	0	0	0	0	0	0	0	0	0	0	0	0	0	0	0	0	0
Mn	Na	W	SiO2	77.685	0.88	0.12	0	7.5	16	3_Literature	0	0	0	0	0	0	0	0	0	0	0	0	0	0	0	0	0	0	0	0	0	0	0	0	0	0	0	0	0	0	0	0	0	0	0	0	0	0	0
Fe	Na	W	SiO2	77.685	0.88	0.12	0	7.5	9	3_Literature	0	0	0	0	0	0	0	0	0	0	0	0	0	0	0	0	0	0	0	0	0	0	0	0	0	0	1	0	0	0	0	0	0	0	0	0	0	0	0
Co	Na	W	SiO2	77.685	0.88	0.12	0	7.5	10.9	3_Literature	0	0	0	0	0	0	0	0	0	0	0	0	0	0	0	0	0	1	0	0	0	0	0	0	0	0	0	0	0	0	0	0	0	0	0	0	0	0	0
Zn	Na	W	SiO2	77.685	0.88	0.12	0	7.5	5.7	3_Literature	0	0	0	0	0	0	0	0	0	0	0	0	0	0	0	0	0	0	0	0	0	0	0	0	0	0	0	0	0	0	0	0	0	0	0	0	0	0	0
Li	none	none	MgO	77.985	0.41	0.2	0.4	2	13.1	3_Literature	0	0	0	0	0	0	0	0	0	0	0	0	0	0	0	0	0	0	0	0	0	0	0	0	0	0	0	0	0	0	0	0	0	0	0	0	0	1	0
Li	none	none	Y2O3	77.985	0.41	0.2	0.4	2	18.4	3_Literature	0	0	0	0	0	0	0	0	0	0	0	0	0	0	0	0	0	0	0	0	0	0	0	0	0	0	0	0	0	0	0	0	0	0	0	0	0	1	0
Li	none	none	La2O3	77.985	0.41	0.2	0.4	2	11.9	3_Literature	0	0	0	0	0	0	0	0	0	0	0	0	0	0	0	0	0	0	0	0	0	0	0	0	0	0	0	0	0	0	0	0	0	0	0	0	1	1	0
Li	none	none	Sm2O3	77.985	0.41	0.2	0.4	2	12.7	3_Literature	0	0	0	0	0	0	0	0	0	0	0	0	0	0	0	0	0	0	0	0	0	0	0	0	0	0	0	0	0	0	0	0	0	0	0	0	0	1	0
Na	W	none	SiO2	79.985	0.75	0.25	0	3	4.8	3_Literature	0	0	0	0	0	0	0	0	0	0	0	0	0	0	0	0	0	0	0	0	0	0	0	0	0	0	0	0	0	0	0	0	0	0	0	0	0	0	0
Na	Mn	none	SiO2	79.985	0.75	0.25	0	3	1.4	3_Literature	0	0	0	0	0	0	0	0	0	0	0	0	0	0	0	0	0	0	0	0	0	0	0	0	0	0	0	0	0	0	0	0	0	0	0	0	0	0	0
W	Mn	none	SiO2	79.985	0.75	0.25	0	3	0.5	3_Literature	0	0	0	0	0	0	0	0	0	0	0	0	0	0	0	0	0	0	0	0	0	0	0	0	0	0	0	0	0	0	0	0	0	0	0	0	0	0	0
Na	W	Mn	SiO2	79.985	0.75	0.25	0	3	19.1	3_Literature	0	0	0	0	0	0	0	0	0	0	0	0	0	0	0	0	0	0	0	0	0	0	0	0	0	0	0	0	0	0	0	0	0	0	0	0	0	0	0
Na	W	none	SiO2	77.485	0.88	0.12	0	7.3	2.8	3_Literature	0	0	0	0	0	0	0	0	0	0	0	0	0	0	0	0	0	0	0	0	0	0	0	0	0	0	0	0	0	0	0	0	0	0	0	0	0	0	0
Mn	Na	W	SiO2	77.485	0.88	0.12	0	7.3	18.5	3_Literature	0	0	0	0	0	0	0	0	0	0	0	0	0	0	0	0	0	0	0	0	0	0	0	0	0	0	0	0	0	0	0	0	0	0	0	0	0	0	0
none	Y	Sm	Bi2O3	89.985	0.18	0.05	0.8	4	8	3_Literature	0	0	0	0	0	0	0	0	0	0	0	1	0	0	0	0	0	0	0	0	0	0	0	0	0	0	0	0	0	0	0	0	0	0	0	0	0	0	0
Na	W	Mn	SiO2	74.985	0.89	0.11	0	8.1	10.8	3_Literature	0	0	0	0	0	0	0	0	0	0	0	0	0	0	0	0	0	0	0	0	0	0	0	0	0	0	0	0	0	0	0	0	0	0	0	0	0	0	0
none	none	none	CeO2	80.485	0.55	0.09	0.4	5.8	1.6	3_Literature	0	0	0	0	0	0	0	0	0	0	0	0	0	0	0	0	1	0	0	0	0	0	0	0	0	0	0	0	0	0	0	0	0	0	0	0	0	0	0
none	none	none	Tb2O3	79.985	0.75	0.05	0.2	14.4	7.2	3_Literature	0	0	0	0	0	0	0	0	0	0	0	0	0	0	0	0	0	0	0	0	0	0	0	0	0	0	0	0	0	0	0	0	0	0	0	0	0	0	0
none	none	none	La2O3	81.985	0.74	0.05	0.2	13.7	9.7	3_Literature	0	0	0	0	0	0	0	0	0	0	0	0	0	0	0	0	0	0	0	0	0	0	0	0	0	0	0	0	0	0	0	0	0	0	0	0	1	0	0
none	none	none	Y2O3	86.985	0.58	0.09	0.3	6.7	9.7	3_Literature	0	0	0	0	0	0	0	0	0	0	0	0	0	0	0	0	0	0	0	0	0	0	0	0	0	0	0	0	0	0	0	0	0	0	0	0	0	0	0
none	none	none	Sm2O3	80.985	0.54	0.1	0.4	5.6	11.7	3_Literature	0	0	0	0	0	0	0	0	0	0	0	0	0	0	0	0	0	0	0	0	0	0	0	0	0	0	0	0	0	0	0	0	0	0	0	0	0	0	0
none	none	none	Yb2O3	80.485	0.6	0.08	0.3	7.1	9.6	3_Literature	0	0	0	0	0	0	0	0	0	0	0	0	0	0	0	0	0	0	0	0	0	0	0	0	0	0	0	0	0	0	0	0	0	0	0	0	0	0	0
none	none	none	Eu2O3	79.485	0.6	0.08	0.3	7.1	13.5	3_Literature	0	0	0	0	0	0	0	0	0	0	0	0	0	0	0	0	0	0	0	0	0	0	0	0	0	1	0	0	0	0	0	0	0	0	0	0	0	0	0
none	Nd	none	La2O3	85.485	0.56	0.09	0.4	6.6	11.1	3_Literature	0	0	0	0	0	0	0	0	0	0	0	0	0	0	0	0	0	0	0	0	0	0	0	0	0	0	0	0	0	0	0	0	0	0	0	0	1	0	0
Li	W	Mn	SiO2	79.985	0.76	0.24	0	3.2	13.1	3_Literature	0	0	0	0	0	0	0	0	0	0	0	0	0	0	0	0	0	0	0	0	0	0	0	0	0	0	0	0	0	0	0	0	0	0	0	0	0	1	0
Na	W	Mn	SiO2	79.985	0.76	0.24	0	3.2	19.6	3_Literature	0	0	0	0	0	0	0	0	0	0	0	0	0	0	0	0	0	0	0	0	0	0	0	0	0	0	0	0	0	0	0	0	0	0	0	0	0	0	0
K	W	Mn	SiO2	79.985	0.76	0.24	0	3.2	18.5	3_Literature	0	0	0	0	0	0	0	0	0	0	0	0	0	0	0	0	0	0	0	0	0	0	0	0	0	0	0	0	0	0	0	0	0	1	0	0	0	0	0
Ba	W	Mn	SiO2	79.985	0.76	0.24	0	3.2	6.9	3_Literature	0	0	0	0	0	0	1	0	0	0	0	0	0	0	0	0	0	0	0	0	0	0	0	0	0	0	0	0	0	0	0	0	0	0	0	0	0	0	0
Ca	W	Mn	SiO2	79.985	0.76	0.24	0	3.2	4.8	3_Literature	0	0	0	0	0	0	0	0	0	0	0	0	1	0	0	0	0	0	0	0	0	0	0	0	0	0	0	0	0	0	0	0	0	0	0	0	0	0	0
Fe	W	Mn	SiO2	79.985	0.76	0.24	0	3.2	2.7	3_Literature	0	0	0	0	0	0	0	0	0	0	0	0	0	0	0	0	0	0	0	0	0	0	0	0	0	0	1	0	0	0	0	0	0	0	0	0	0	0	0
Co	W	Mn	SiO2	79.985	0.76	0.24	0	3.2	4.2	3_Literature	0	0	0	0	0	0	0	0	0	0	0	0	0	0	0	0	0	1	0	0	0	0	0	0	0	0	0	0	0	0	0	0	0	0	0	0	0	0	0
Ni	W	Mn	SiO2	79.985	0.76	0.24	0	3.2	4.4	3_Literature	0	0	0	0	0	0	0	0	0	0	0	0	0	0	0	0	0	0	0	0	0	0	0	0	0	0	0	0	0	0	0	0	0	0	0	0	0	0	0
Al	W	Mn	SiO2	79.985	0.76	0.24	0	3.2	3	3_Literature	0	1	0	0	0	0	0	0	0	0	0	0	0	0	0	0	0	0	0	0	0	0	0	0	0	0	0	0	0	0	0	0	0	0	0	0	0	0	0
Li	none	none	MgO	74.985	0.5	0.1	0.4	5	11.8	3_Literature	0	0	0	0	0	0	0	0	0	0	0	0	0	0	0	0	0	0	0	0	0	0	0	0	0	0	0	0	0	0	0	0	0	0	0	0	0	1	0
Li	none	none	MgO	74.985	0.5	0.1	0.4	5	19.9	3_Literature	0	0	0	0	0	0	0	0	0	0	0	0	0	0	0	0	0	0	0	0	0	0	0	0	0	0	0	0	0	0	0	0	0	0	0	0	0	1	0
Li	none	none	MgO	74.985	0.5	0.1	0.4	5	15	3_Literature	0	0	0	0	0	0	0	0	0	0	0	0	0	0	0	0	0	0	0	0	0	0	0	0	0	0	0	0	0	0	0	0	0	0	0	0	0	1	0
Li	none	none	MgO	74.985	0.5	0.1	0.4	5	10.3	3_Literature	0	0	0	0	0	0	0	0	0	0	0	0	0	0	0	0	0	0	0	0	0	0	0	0	0	0	0	0	0	0	0	0	0	0	0	0	0	1	0
Sr	none	none	La2O3	69.985	0.78	0.22	0	3.6	12	3_Literature	0	0	0	0	0	0	0	0	0	0	0	0	0	0	0	0	0	0	0	0	0	0	0	0	0	0	0	0	0	0	0	0	0	0	0	0	1	0	0
Ni	Sr	none	La2O3	69.985	0.78	0.22	0	3.6	2.4	3_Literature	0	0	0	0	0	0	0	0	0	0	0	0	0	0	0	0	0	0	0	0	0	0	0	0	0	0	0	0	0	0	0	0	0	0	0	0	1	0	0
Mn	none	none	SiO2	79.985	0.42	0.17	0.4	2.5	5.8	3_Literature	0	0	0	0	0	0	0	0	0	0	0	0	0	0	0	0	0	0	0	0	0	0	0	0	0	0	0	0	0	0	0	0	0	0	0	0	0	0	0
Na	W	Mn	SiO2	79.985	0.42	0.17	0.4	2.5	19.2	3_Literature	0	0	0	0	0	0	0	0	0	0	0	0	0	0	0	0	0	0	0	0	0	0	0	0	0	0	0	0	0	0	0	0	0	0	0	0	0	0	0
Na	Mo	Mn	SiO2	79.985	0.42	0.17	0.4	2.5	14	3_Literature	0	0	0	0	0	0	0	0	0	0	0	0	0	0	0	0	0	0	0	0	0	0	0	0	0	0	0	0	0	0	0	0	0	0	0	0	0	0	0
Na	Mn	none	SiO2	79.985	0.42	0.17	0.4	2.5	4.2	3_Literature	0	0	0	0	0	0	0	0	0	0	0	0	0	0	0	0	0	0	0	0	0	0	0	0	0	0	0	0	0	0	0	0	0	0	0	0	0	0	0
Na	W	none	SiO2	79.985	0.42	0.17	0.4	2.5	9.5	3_Literature	0	0	0	0	0	0	0	0	0	0	0	0	0	0	0	0	0	0	0	0	0	0	0	0	0	0	0	0	0	0	0	0	0	0	0	0	0	0	0
Na	Mo	none	SiO2	79.985	0.42	0.17	0.4	2.5	8.3	3_Literature	0	0	0	0	0	0	0	0	0	0	0	0	0	0	0	0	0	0	0	0	0	0	0	0	0	0	0	0	0	0	0	0	0	0	0	0	0	0	0
Na	none	none	SiO2	79.985	0.42	0.17	0.4	2.5	0	3_Literature	0	0	0	0	0	0	0	0	0	0	0	0	0	0	0	0	0	0	0	0	0	0	0	0	0	0	0	0	0	0	0	0	0	0	0	0	0	0	0
none	none	none	CaO	79.985	0.89	0.11	0	8	6.6	3_Literature	0	0	0	0	0	0	0	0	0	0	0	0	0	1	0	0	0	0	0	0	0	0	0	0	0	0	0	0	0	0	0	0	0	0	0	0	0	0	0
La	none	none	CaO	79.985	0.89	0.11	0	8	13.3	3_Literature	0	0	0	0	0	0	0	0	0	0	0	0	0	1	0	0	0	0	0	0	0	0	0	0	0	0	0	0	0	0	0	0	0	0	0	1	0	0	0
Ce	none	none	CaO	79.985	0.89	0.11	0	8	11.5	3_Literature	0	0	0	0	0	0	0	0	0	0	0	0	0	1	0	1	0	0	0	0	0	0	0	0	0	0	0	0	0	0	0	0	0	0	0	0	0	0	0
Sm	none	none	CaO	79.985	0.89	0.11	0	8	11.7	3_Literature	0	0	0	0	0	0	0	0	0	0	0	0	0	1	0	0	0	0	0	0	0	0	0	0	0	0	0	0	0	0	0	0	0	0	0	0	0	0	0
Nd	none	none	CaO	79.985	0.89	0.11	0	8	13.8	3_Literature	0	0	0	0	0	0	0	0	0	0	0	0	0	1	0	0	0	0	0	0	0	0	0	0	0	0	0	0	0	0	0	0	0	0	0	0	0	0	0
Yb	none	none	CaO	79.985	0.89	0.11	0	8	13.3	3_Literature	0	0	0	0	0	0	0	0	0	0	0	0	0	1	0	0	0	0	0	0	0	0	0	0	0	0	0	0	0	0	0	0	0	0	0	0	0	0	0
Na	W	Mn	SiO2	81.985	0.8	0.2	0	4	20.7	3_Literature	0	0	0	0	0	0	0	0	0	0	0	0	0	0	0	0	0	0	0	0	0	0	0	0	0	0	0	0	0	0	0	0	0	0	0	0	0	0	0
Na	W	Mn	SiO2	69.985	0.67	0.33	0	2	17.5	3_Literature	0	0	0	0	0	0	0	0	0	0	0	0	0	0	0	0	0	0	0	0	0	0	0	0	0	0	0	0	0	0	0	0	0	0	0	0	0	0	0
Na	W	Mn	SiO2	81.985	0.8	0.2	0	4	15.5	3_Literature	0	0	0	0	0	0	0	0	0	0	0	0	0	0	0	0	0	0	0	0	0	0	0	0	0	0	0	0	0	0	0	0	0	0	0	0	0	0	0
W	Li	none	SiO2	69.985	0.88	0.12	0	7.5	5.2	3_Literature	0	0	0	0	0	0	0	0	0	0	0	0	0	0	0	0	0	0	0	0	0	0	0	0	0	0	0	0	0	0	0	0	0	0	0	0	0	1	0
Mn	Li	none	SiO2	69.985	0.88	0.12	0	7.5	6	3_Literature	0	0	0	0	0	0	0	0	0	0	0	0	0	0	0	0	0	0	0	0	0	0	0	0	0	0	0	0	0	0	0	0	0	0	0	0	0	1	0
Mn	W	none	SiO2	69.985	0.88	0.12	0	7.5	6	3_Literature	0	0	0	0	0	0	0	0	0	0	0	0	0	0	0	0	0	0	0	0	0	0	0	0	0	0	0	0	0	0	0	0	0	0	0	0	0	0	0
Li	Mn	W	SiO2	69.985	0.88	0.12	0	7.5	15	3_Literature	0	0	0	0	0	0	0	0	0	0	0	0	0	0	0	0	0	0	0	0	0	0	0	0	0	0	0	0	0	0	0	0	0	0	0	0	0	1	0
La	Sr	none	CaO	79.985	0.1	0.03	0.9	3	18.8	3_Literature	0	0	0	0	0	0	0	0	0	0	0	0	0	1	0	0	0	0	0	0	0	0	0	0	0	0	0	0	0	0	0	0	0	0	0	1	0	0	0
La	none	none	CaO	79.985	0.1	0.03	0.9	3	16.6	3_Literature	0	0	0	0	0	0	0	0	0	0	0	0	0	1	0	0	0	0	0	0	0	0	0	0	0	0	0	0	0	0	0	0	0	0	0	1	0	0	0
La	none	none	MgO	79.985	0.1	0.03	0.9	3	12.9	3_Literature	0	0	0	0	0	0	0	0	0	0	0	0	0	0	0	0	0	0	0	0	0	0	0	0	0	0	0	0	0	0	0	0	0	0	0	1	0	0	0
Li	none	none	MgO	79.985	0.1	0.03	0.9	3	2.1	3_Literature	0	0	0	0	0	0	0	0	0	0	0	0	0	0	0	0	0	0	0	0	0	0	0	0	0	0	0	0	0	0	0	0	0	0	0	0	0	1	0
Sn	Li	none	MgO	79.985	0.1	0.03	0.9	3	17.7	3_Literature	0	0	0	0	0	0	0	0	0	0	0	0	0	0	0	0	0	0	0	0	0	0	0	0	0	0	0	0	0	0	0	0	0	0	0	0	0	1	0
La	none	none	TiO2	79.985	0.1	0.03	0.9	3	0.4	3_Literature	0	0	0	0	0	0	0	0	0	0	0	0	0	0	0	0	0	0	0	0	0	0	0	0	0	0	0	0	0	0	0	0	0	0	0	1	0	0	0
Co	none	none	MgO	79.985	0.1	0.03	0.9	3	0	3_Literature	0	0	0	0	0	0	0	0	0	0	0	0	0	0	0	0	0	1	0	0	0	0	0	0	0	0	0	0	0	0	0	0	0	0	0	0	0	0	0
La	none	none	MgO	79.985	0.1	0.03	0.9	3	7.5	3_Literature	0	0	0	0	0	0	0	0	0	0	0	0	0	0	0	0	0	0	0	0	0	0	0	0	0	0	0	0	0	0	0	0	0	0	0	1	0	0	0
Sr	none	none	La2O3	79.985	0.1	0.03	0.9	3	15	3_Literature	0	0	0	0	0	0	0	0	0	0	0	0	0	0	0	0	0	0	0	0	0	0	0	0	0	0	0	0	0	0	0	0	0	0	0	0	1	0	0
V	none	none	MgO	79.985	0.1	0.03	0.9	3	0	3_Literature	0	0	0	0	0	0	0	0	0	0	0	0	0	0	0	0	0	0	0	0	0	0	0	0	0	0	0	0	0	0	0	0	0	0	0	0	0	0	0
Pd	none	none	MgO	79.985	0.1	0.03	0.9	3	0.9	3_Literature	0	0	0	0	0	0	0	0	0	0	0	0	0	0	0	0	0	0	0	0	0	0	0	0	0	0	0	0	0	0	0	0	0	0	0	0	0	0	0
Pt	none	none	MgO	79.985	0.1	0.03	0.9	3	0.6	3_Literature	0	0	0	0	0	0	0	0	0	0	0	0	0	0	0	0	0	0	0	0	0	0	0	0	0	0	0	0	0	0	0	0	0	0	0	0	0	0	0
La	none	none	MgO	79.985	0.1	0.03	0.9	3	14.3	3_Literature	0	0	0	0	0	0	0	0	0	0	0	0	0	0	0	0	0	0	0	0	0	0	0	0	0	0	0	0	0	0	0	0	0	0	0	1	0	0	0
Li	none	none	MgO	79.985	0.1	0.03	0.9	3	4.5	3_Literature	0	0	0	0	0	0	0	0	0	0	0	0	0	0	0	0	0	0	0	0	0	0	0	0	0	0	0	0	0	0	0	0	0	0	0	0	0	1	0
Cu	Zn	none	SiO2	79.985	0.1	0.03	0.9	3	0.6	3_Literature	0	0	0	0	0	0	0	0	0	0	0	0	0	0	0	0	0	0	0	0	1	0	0	0	0	0	0	0	0	0	0	0	0	0	0	0	0	0	0
Li	none	none	MgO	79.985	0.1	0.03	0.9	3	6.2	3_Literature	0	0	0	0	0	0	0	0	0	0	0	0	0	0	0	0	0	0	0	0	0	0	0	0	0	0	0	0	0	0	0	0	0	0	0	0	0	1	0
La	none	none	MgO	79.985	0.1	0.03	0.9	3	14	3_Literature	0	0	0	0	0	0	0	0	0	0	0	0	0	0	0	0	0	0	0	0	0	0	0	0	0	0	0	0	0	0	0	0	0	0	0	1	0	0	0
Ce	none	none	ZnO	79.985	0.1	0.03	0.9	3	0.5	3_Literature	0	0	0	0	0	0	0	0	0	0	0	0	0	0	0	1	0	0	0	0	0	0	0	0	0	0	0	0	0	0	0	0	0	0	0	0	0	0	0
Ni	none	none	Nd2O3	79.985	0.1	0.03	0.9	3	1.5	3_Literature	0	0	0	0	0	0	0	0	0	0	0	0	0	0	0	0	0	0	0	0	0	0	0	0	0	0	0	0	0	0	0	0	0	0	0	0	0	0	0
none	none	none	SnO	79.985	0.1	0.03	0.9	3	0	3_Literature	0	0	0	0	0	0	0	0	0	0	0	0	0	0	0	0	0	0	0	0	0	0	0	0	0	0	0	0	0	0	0	0	0	0	0	0	0	0	0
La	Sr	none	CaO	79.985	0.07	0.03	0.9	2	19.7	3_Literature	0	0	0	0	0	0	0	0	0	0	0	0	0	1	0	0	0	0	0	0	0	0	0	0	0	0	0	0	0	0	0	0	0	0	0	1	0	0	0
Na	none	none	CaO	84.985	0.9	0.09	0	9.9	9.8	3_Literature	0	0	0	0	0	0	0	0	0	0	0	0	0	1	0	0	0	0	0	0	0	0	0	0	0	0	0	0	0	0	0	0	0	0	0	0	0	0	0
Na	W	Mn	SiO2	69.985	0.4	0.1	0.5	4	25.2	3_Literature	0	0	0	0	0	0	0	0	0	0	0	0	0	0	0	0	0	0	0	0	0	0	0	0	0	0	0	0	0	0	0	0	0	0	0	0	0	0	0
none	none	none	MgO	85.985	0.28	0.07	0.7	4	7.1	3_Literature	0	0	0	0	0	0	0	0	0	0	0	0	0	0	0	0	0	0	0	0	0	0	0	0	0	0	0	0	0	0	0	0	0	0	0	0	0	0	0
Li	none	none	MgO	77.985	0.28	0.07	0.7	4	19.5	3_Literature	0	0	0	0	0	0	0	0	0	0	0	0	0	0	0	0	0	0	0	0	0	0	0	0	0	0	0	0	0	0	0	0	0	0	0	0	0	1	0
none	none	none	CaO	74.985	0.8	0.2	0	4	6.6	3_Literature	0	0	0	0	0	0	0	0	0	0	0	0	0	1	0	0	0	0	0	0	0	0	0	0	0	0	0	0	0	0	0	0	0	0	0	0	0	0	0
Li	none	none	CaO	74.985	0.8	0.2	0	4	8.7	3_Literature	0	0	0	0	0	0	0	0	0	0	0	0	0	1	0	0	0	0	0	0	0	0	0	0	0	0	0	0	0	0	0	0	0	0	0	0	0	1	0
Na	none	none	CaO	74.985	0.8	0.2	0	4	15.2	3_Literature	0	0	0	0	0	0	0	0	0	0	0	0	0	1	0	0	0	0	0	0	0	0	0	0	0	0	0	0	0	0	0	0	0	0	0	0	0	0	0
K	none	none	CaO	74.985	0.8	0.2	0	4	13.4	3_Literature	0	0	0	0	0	0	0	0	0	0	0	0	0	1	0	0	0	0	0	0	0	0	0	0	0	0	0	0	0	0	0	0	0	1	0	0	0	0	0
Rb	none	none	CaO	74.985	0.8	0.2	0	4	13.6	3_Literature	0	0	0	0	0	0	0	0	0	0	0	0	0	1	0	0	0	0	0	0	0	0	0	0	0	0	0	0	0	0	0	0	0	0	0	0	0	0	0
Cs	none	none	CaO	74.985	0.8	0.2	0	4	11.2	3_Literature	0	0	0	0	0	0	0	0	0	0	0	0	0	1	0	0	0	0	0	1	0	0	0	0	0	0	0	0	0	0	0	0	0	0	0	0	0	0	0
Li	none	none	CaO	74.985	0.8	0.2	0	4	13.7	3_Literature	0	0	0	0	0	0	0	0	0	0	0	0	0	1	0	0	0	0	0	0	0	0	0	0	0	0	0	0	0	0	0	0	0	0	0	0	0	1	0
Na	none	none	CaO	74.985	0.8	0.2	0	4	11.2	3_Literature	0	0	0	0	0	0	0	0	0	0	0	0	0	1	0	0	0	0	0	0	0	0	0	0	0	0	0	0	0	0	0	0	0	0	0	0	0	0	0
K	none	none	CaO	74.985	0.8	0.2	0	4	12.8	3_Literature	0	0	0	0	0	0	0	0	0	0	0	0	0	1	0	0	0	0	0	0	0	0	0	0	0	0	0	0	0	0	0	0	0	1	0	0	0	0	0
Rb	none	none	CaO	74.985	0.8	0.2	0	4	11.6	3_Literature	0	0	0	0	0	0	0	0	0	0	0	0	0	1	0	0	0	0	0	0	0	0	0	0	0	0	0	0	0	0	0	0	0	0	0	0	0	0	0
Cs	none	none	CaO	74.985	0.8	0.2	0	4	7.7	3_Literature	0	0	0	0	0	0	0	0	0	0	0	0	0	1	0	0	0	0	0	1	0	0	0	0	0	0	0	0	0	0	0	0	0	0	0	0	0	0	0
Zn	none	none	Nd2O3	79.985	0.42	0.08	0.5	5	18	3_Literature	0	0	0	0	0	0	0	0	0	0	0	0	0	0	0	0	0	0	0	0	0	0	0	0	0	0	0	0	0	0	0	0	0	0	0	0	0	0	0
Fe	none	none	La2O3	74.985	0.24	0.02	0.7	10.2	3.5	3_Literature	0	0	0	0	0	0	0	0	0	0	0	0	0	0	0	0	0	0	0	0	0	0	0	0	0	0	1	0	0	0	0	0	0	0	0	0	1	0	0
Na	Fe	none	La2O3	74.985	0.24	0.02	0.7	10.2	1.3	3_Literature	0	0	0	0	0	0	0	0	0	0	0	0	0	0	0	0	0	0	0	0	0	0	0	0	0	0	1	0	0	0	0	0	0	0	0	0	1	0	0
none	none	none	ZrO2	59.985	0.67	0.33	0	2	6.3	3_Literature	0	0	0	0	0	0	0	0	0	0	0	0	0	0	0	0	0	0	0	0	0	0	0	0	0	0	0	0	0	0	0	0	0	0	0	0	0	0	0
none	La	none	Li2O	74.985	0.18	0.01	0.8	16.3	1.8	3_Literature	0	0	0	0	0	0	0	0	0	0	0	0	0	0	0	0	0	0	0	0	0	0	0	0	0	0	0	0	0	0	0	0	0	0	0	1	0	0	1
Li	none	none	MgO	78.985	0.68	0.07	0.3	10	9.7	3_Literature	0	0	0	0	0	0	0	0	0	0	0	0	0	0	0	0	0	0	0	0	0	0	0	0	0	0	0	0	0	0	0	0	0	0	0	0	0	1	0
Ca	none	none	Sm2O3	67.485	0.68	0.07	0.3	10	9	3_Literature	0	0	0	0	0	0	0	0	0	0	0	0	1	0	0	0	0	0	0	0	0	0	0	0	0	0	0	0	0	0	0	0	0	0	0	0	0	0	0
none	none	none	Sm2O3	77.985	0.68	0.07	0.3	10	6.6	3_Literature	0	0	0	0	0	0	0	0	0	0	0	0	0	0	0	0	0	0	0	0	0	0	0	0	0	0	0	0	0	0	0	0	0	0	0	0	0	0	0
none	none	none	Dy2O3	79.285	0.68	0.07	0.3	10	6.8	3_Literature	0	0	0	0	0	0	0	0	0	0	0	0	0	0	0	0	0	0	0	0	0	0	1	0	0	0	0	0	0	0	0	0	0	0	0	0	0	0	0
none	none	none	Gd2O3	76.985	0.68	0.07	0.3	10	5.8	3_Literature	0	0	0	0	0	0	0	0	0	0	0	0	0	0	0	0	0	0	0	0	0	0	0	0	0	0	0	0	0	1	0	0	0	0	0	0	0	0	0
none	none	none	La2O3	73.985	0.68	0.07	0.3	10	7.5	3_Literature	0	0	0	0	0	0	0	0	0	0	0	0	0	0	0	0	0	0	0	0	0	0	0	0	0	0	0	0	0	0	0	0	0	0	0	0	1	0	0
none	none	none	Tb2O3	81.985	0.68	0.07	0.3	10	2.2	3_Literature	0	0	0	0	0	0	0	0	0	0	0	0	0	0	0	0	0	0	0	0	0	0	0	0	0	0	0	0	0	0	0	0	0	0	0	0	0	0	0
Li	none	none	MgO	63.385	0.08	0.05	0.9	1.7	0.2	3_Literature	0	0	0	0	0	0	0	0	0	0	0	0	0	0	0	0	0	0	0	0	0	0	0	0	0	0	0	0	0	0	0	0	0	0	0	0	0	1	0
Na	none	none	CaO	76.985	0.37	0.07	0.6	5	3	3_Literature	0	0	0	0	0	0	0	0	0	0	0	0	0	1	0	0	0	0	0	0	0	0	0	0	0	0	0	0	0	0	0	0	0	0	0	0	0	0	0
Pb	none	none	CaO	76.985	0.37	0.07	0.6	5	3.1	3_Literature	0	0	0	0	0	0	0	0	0	0	0	0	0	1	0	0	0	0	0	0	0	0	0	0	0	0	0	0	0	0	0	0	0	0	0	0	0	0	0
Bi	none	none	CaO	76.985	0.37	0.07	0.6	5	2.5	3_Literature	0	0	0	0	0	0	0	0	0	0	1	0	0	1	0	0	0	0	0	0	0	0	0	0	0	0	0	0	0	0	0	0	0	0	0	0	0	0	0
none	none	none	CaO	76.985	0.37	0.07	0.6	5	3.8	3_Literature	0	0	0	0	0	0	0	0	0	0	0	0	0	1	0	0	0	0	0	0	0	0	0	0	0	0	0	0	0	0	0	0	0	0	0	0	0	0	0
La	none	none	BaO	79.985	0.91	0.09	0	10	7.3	3_Literature	0	0	0	0	0	0	0	1	0	0	0	0	0	0	0	0	0	0	0	0	0	0	0	0	0	0	0	0	0	0	0	0	0	0	0	1	0	0	0
La	none	none	BaO	79.985	0.91	0.09	0	10	9.2	3_Literature	0	0	0	0	0	0	0	1	0	0	0	0	0	0	0	0	0	0	0	0	0	0	0	0	0	0	0	0	0	0	0	0	0	0	0	1	0	0	0
none	Ba	none	La2O3	79.985	0.91	0.09	0	10	7.2	3_Literature	0	0	0	0	0	0	1	0	0	0	0	0	0	0	0	0	0	0	0	0	0	0	0	0	0	0	0	0	0	0	0	0	0	0	0	0	1	0	0
none	Ba	none	La2O3	79.985	0.91	0.09	0	10	8.5	3_Literature	0	0	0	0	0	0	1	0	0	0	0	0	0	0	0	0	0	0	0	0	0	0	0	0	0	0	0	0	0	0	0	0	0	0	0	0	1	0	0
Sb	none	none	SiO2	77.985	0.5	0.11	0.4	4.5	1.8	3_Literature	0	0	0	0	0	0	0	0	0	0	0	0	0	0	0	0	0	0	0	0	0	0	0	0	0	0	0	0	0	0	0	0	0	0	0	0	0	0	0
K	Sb	none	SiO2	77.985	0.5	0.11	0.4	4.5	2.5	3_Literature	0	0	0	0	0	0	0	0	0	0	0	0	0	0	0	0	0	0	0	0	0	0	0	0	0	0	0	0	0	0	0	0	0	1	0	0	0	0	0
K	Sb	none	SiO2	77.985	0.5	0.11	0.4	4.5	2.2	3_Literature	0	0	0	0	0	0	0	0	0	0	0	0	0	0	0	0	0	0	0	0	0	0	0	0	0	0	0	0	0	0	0	0	0	1	0	0	0	0	0
none	none	none	La2O3	74.985	0.08	0.04	0.9	2	12	3_Literature	0	0	0	0	0	0	0	0	0	0	0	0	0	0	0	0	0	0	0	0	0	0	0	0	0	0	0	0	0	0	0	0	0	0	0	0	1	0	0
none	none	none	MgO	79.985	0.86	0.14	0	6.1	3.8	3_Literature	0	0	0	0	0	0	0	0	0	0	0	0	0	0	0	0	0	0	0	0	0	0	0	0	0	0	0	0	0	0	0	0	0	0	0	0	0	0	0
none	none	none	SiO2	79.985	0.86	0.14	0	6.1	0.3	3_Literature	0	0	0	0	0	0	0	0	0	0	0	0	0	0	0	0	0	0	0	0	0	0	0	0	0	0	0	0	0	0	0	0	0	0	0	0	0	0	0
none	none	none	CaO	79.985	0.86	0.14	0	6.1	1.3	3_Literature	0	0	0	0	0	0	0	0	0	0	0	0	0	1	0	0	0	0	0	0	0	0	0	0	0	0	0	0	0	0	0	0	0	0	0	0	0	0	0
Li	none	none	Al2O3	79.985	0.86	0.14	0	6.1	1.7	3_Literature	0	0	1	0	0	0	0	0	0	0	0	0	0	0	0	0	0	0	0	0	0	0	0	0	0	0	0	0	0	0	0	0	0	0	0	0	0	1	0
none	none	none	Sm2O3	79.985	0.86	0.14	0	6.1	8.3	3_Literature	0	0	0	0	0	0	0	0	0	0	0	0	0	0	0	0	0	0	0	0	0	0	0	0	0	0	0	0	0	0	0	0	0	0	0	0	0	0	0
Sm	none	none	SiO2	79.985	0.86	0.14	0	6.1	1.6	3_Literature	0	0	0	0	0	0	0	0	0	0	0	0	0	0	0	0	0	0	0	0	0	0	0	0	0	0	0	0	0	0	0	0	0	0	0	0	0	0	0
Sm	none	none	MgO	79.985	0.86	0.14	0	6.1	9.4	3_Literature	0	0	0	0	0	0	0	0	0	0	0	0	0	0	0	0	0	0	0	0	0	0	0	0	0	0	0	0	0	0	0	0	0	0	0	0	0	0	0
Sm	none	none	CaO	79.985	0.86	0.14	0	6.1	6.9	3_Literature	0	0	0	0	0	0	0	0	0	0	0	0	0	1	0	0	0	0	0	0	0	0	0	0	0	0	0	0	0	0	0	0	0	0	0	0	0	0	0
Li	none	none	MgO	69.985	0.91	0.09	0	10	3.8	3_Literature	0	0	0	0	0	0	0	0	0	0	0	0	0	0	0	0	0	0	0	0	0	0	0	0	0	0	0	0	0	0	0	0	0	0	0	0	0	1	0
none	Zr	none	Li2O	69.985	0.91	0.09	0	10	1.4	3_Literature	0	0	0	0	0	0	0	0	0	0	0	0	0	0	0	0	0	0	0	0	0	0	0	0	0	0	0	0	0	0	0	0	0	0	0	0	0	0	1
Zr	none	none	MgO	69.985	0.91	0.09	0	10	0.3	3_Literature	0	0	0	0	0	0	0	0	0	0	0	0	0	0	0	0	0	0	0	0	0	0	0	0	0	0	0	0	0	0	0	0	0	0	0	0	0	0	0
Li	none	none	MgO	74.985	0.91	0.09	0	10	9.6	3_Literature	0	0	0	0	0	0	0	0	0	0	0	0	0	0	0	0	0	0	0	0	0	0	0	0	0	0	0	0	0	0	0	0	0	0	0	0	0	1	0
none	Zr	none	Li2O	74.985	0.91	0.09	0	10	2.4	3_Literature	0	0	0	0	0	0	0	0	0	0	0	0	0	0	0	0	0	0	0	0	0	0	0	0	0	0	0	0	0	0	0	0	0	0	0	0	0	0	1
Zr	none	none	MgO	74.985	0.91	0.09	0	10	2	3_Literature	0	0	0	0	0	0	0	0	0	0	0	0	0	0	0	0	0	0	0	0	0	0	0	0	0	0	0	0	0	0	0	0	0	0	0	0	0	0	0
Li	none	none	MgO	79.985	0.91	0.09	0	10	13.6	3_Literature	0	0	0	0	0	0	0	0	0	0	0	0	0	0	0	0	0	0	0	0	0	0	0	0	0	0	0	0	0	0	0	0	0	0	0	0	0	1	0
none	Zr	none	Li2O	79.985	0.91	0.09	0	10	3.4	3_Literature	0	0	0	0	0	0	0	0	0	0	0	0	0	0	0	0	0	0	0	0	0	0	0	0	0	0	0	0	0	0	0	0	0	0	0	0	0	0	1
Zr	none	none	MgO	79.985	0.91	0.09	0	10	5.5	3_Literature	0	0	0	0	0	0	0	0	0	0	0	0	0	0	0	0	0	0	0	0	0	0	0	0	0	0	0	0	0	0	0	0	0	0	0	0	0	0	0
Li	Zr	none	MgO	73.985	0.82	0.18	0	4.6	11	3_Literature	0	0	0	0	0	0	0	0	0	0	0	0	0	0	0	0	0	0	0	0	0	0	0	0	0	0	0	0	0	0	0	0	0	0	0	0	0	1	0
K	Ni	none	CaO	70.485	0.3	0.12	0.6	2.5	13.2	3_Literature	0	0	0	0	0	0	0	0	0	0	0	0	0	1	0	0	0	0	0	0	0	0	0	0	0	0	0	0	0	0	0	0	0	1	0	0	0	0	0
K	Ni	none	MgO	70.485	0.3	0.12	0.6	2.5	6.7	3_Literature	0	0	0	0	0	0	0	0	0	0	0	0	0	0	0	0	0	0	0	0	0	0	0	0	0	0	0	0	0	0	0	0	0	1	0	0	0	0	0
Na	Ni	none	MgO	70.485	0.3	0.12	0.6	2.5	4.9	3_Literature	0	0	0	0	0	0	0	0	0	0	0	0	0	0	0	0	0	0	0	0	0	0	0	0	0	0	0	0	0	0	0	0	0	0	0	0	0	0	0
Li	Ni	none	MgO	70.485	0.3	0.12	0.6	2.5	9.1	3_Literature	0	0	0	0	0	0	0	0	0	0	0	0	0	0	0	0	0	0	0	0	0	0	0	0	0	0	0	0	0	0	0	0	0	0	0	0	0	1	0
Sr	none	none	La2O3	69.985	0.46	0.05	0.5	10.2	7.2	3_Literature	0	0	0	0	0	0	0	0	0	0	0	0	0	0	0	0	0	0	0	0	0	0	0	0	0	0	0	0	0	0	0	0	0	0	0	0	1	0	0
Sr	none	none	La2O3	72.485	0.46	0.05	0.5	10.2	11.3	3_Literature	0	0	0	0	0	0	0	0	0	0	0	0	0	0	0	0	0	0	0	0	0	0	0	0	0	0	0	0	0	0	0	0	0	0	0	0	1	0	0
Sr	none	none	La2O3	74.985	0.46	0.05	0.5	10.2	12.5	3_Literature	0	0	0	0	0	0	0	0	0	0	0	0	0	0	0	0	0	0	0	0	0	0	0	0	0	0	0	0	0	0	0	0	0	0	0	0	1	0	0
Li	none	none	CaO	74.985	0.3	0.15	0.6	2	2.8	3_Literature	0	0	0	0	0	0	0	0	0	0	0	0	0	1	0	0	0	0	0	0	0	0	0	0	0	0	0	0	0	0	0	0	0	0	0	0	0	1	0
Na	none	none	La2O3	74.985	0.4	0.08	0.5	5	10	3_Literature	0	0	0	0	0	0	0	0	0	0	0	0	0	0	0	0	0	0	0	0	0	0	0	0	0	0	0	0	0	0	0	0	0	0	0	0	1	0	0
Na	none	none	La2O3	64.985	0.4	0.08	0.5	5	3.3	3_Literature	0	0	0	0	0	0	0	0	0	0	0	0	0	0	0	0	0	0	0	0	0	0	0	0	0	0	0	0	0	0	0	0	0	0	0	0	1	0	0
Na	none	none	La2O3	64.985	0.4	0.08	0.5	5	3.6	3_Literature	0	0	0	0	0	0	0	0	0	0	0	0	0	0	0	0	0	0	0	0	0	0	0	0	0	0	0	0	0	0	0	0	0	0	0	0	1	0	0
Na	none	none	La2O3	64.985	0.4	0.08	0.5	5	5.5	3_Literature	0	0	0	0	0	0	0	0	0	0	0	0	0	0	0	0	0	0	0	0	0	0	0	0	0	0	0	0	0	0	0	0	0	0	0	0	1	0	0
Na	none	none	La2O3	64.985	0.4	0.08	0.5	5	2.6	3_Literature	0	0	0	0	0	0	0	0	0	0	0	0	0	0	0	0	0	0	0	0	0	0	0	0	0	0	0	0	0	0	0	0	0	0	0	0	1	0	0
Na	none	none	La2O3	64.985	0.4	0.08	0.5	5	1.6	3_Literature	0	0	0	0	0	0	0	0	0	0	0	0	0	0	0	0	0	0	0	0	0	0	0	0	0	0	0	0	0	0	0	0	0	0	0	0	1	0	0
none	none	none	CeO2	74.985	0.4	0.08	0.5	5	0.8	3_Literature	0	0	0	0	0	0	0	0	0	0	0	0	0	0	0	0	1	0	0	0	0	0	0	0	0	0	0	0	0	0	0	0	0	0	0	0	0	0	0
none	none	none	La2O3	74.985	0.4	0.08	0.5	5	7.1	3_Literature	0	0	0	0	0	0	0	0	0	0	0	0	0	0	0	0	0	0	0	0	0	0	0	0	0	0	0	0	0	0	0	0	0	0	0	0	1	0	0
none	none	none	ZnO	74.985	0.4	0.08	0.5	5	11.1	3_Literature	0	0	0	0	0	0	0	0	0	0	0	0	0	0	0	0	0	0	0	0	0	0	0	0	0	0	0	0	0	0	0	0	0	0	0	0	0	0	0
none	Ge	none	Bi2O3	77.985	0.3	0.15	0.6	2	3	3_Literature	0	0	0	0	0	0	0	0	0	0	0	1	0	0	0	0	0	0	0	0	0	0	0	0	0	0	0	0	0	0	1	0	0	0	0	0	0	0	0
Sm	none	none	SiO2	84.985	0.85	0.15	0	5.7	9.1	3_Literature	0	0	0	0	0	0	0	0	0	0	0	0	0	0	0	0	0	0	0	0	0	0	0	0	0	0	0	0	0	0	0	0	0	0	0	0	0	0	0
Sm	none	none	SiO2	84.985	0.85	0.15	0	5.7	13.2	3_Literature	0	0	0	0	0	0	0	0	0	0	0	0	0	0	0	0	0	0	0	0	0	0	0	0	0	0	0	0	0	0	0	0	0	0	0	0	0	0	0
Sm	none	none	SiO2	84.985	0.85	0.15	0	5.7	7.7	3_Literature	0	0	0	0	0	0	0	0	0	0	0	0	0	0	0	0	0	0	0	0	0	0	0	0	0	0	0	0	0	0	0	0	0	0	0	0	0	0	0
Li	none	none	TiO2	79.985	0.03	0.03	1	1	26.1	3_Literature	0	0	0	0	0	0	0	0	0	0	0	0	0	0	0	0	0	0	0	0	0	0	0	0	0	0	0	0	0	0	0	0	0	0	0	0	0	1	0
Li	none	none	ZnO	79.985	0.03	0.03	1	1	8	3_Literature	0	0	0	0	0	0	0	0	0	0	0	0	0	0	0	0	0	0	0	0	0	0	0	0	0	0	0	0	0	0	0	0	0	0	0	0	0	1	0
none	none	none	Sm2O3	69.985	0.13	0.07	0.8	2	6.4	3_Literature	0	0	0	0	0	0	0	0	0	0	0	0	0	0	0	0	0	0	0	0	0	0	0	0	0	0	0	0	0	0	0	0	0	0	0	0	0	0	0
none	none	none	Nd2O3	69.985	0.13	0.07	0.8	2	8.9	3_Literature	0	0	0	0	0	0	0	0	0	0	0	0	0	0	0	0	0	0	0	0	0	0	0	0	0	0	0	0	0	0	0	0	0	0	0	0	0	0	0
none	none	none	La2O3	69.985	0.13	0.07	0.8	2	6.3	3_Literature	0	0	0	0	0	0	0	0	0	0	0	0	0	0	0	0	0	0	0	0	0	0	0	0	0	0	0	0	0	0	0	0	0	0	0	0	1	0	0
none	none	none	Sm2O3	69.985	0.18	0.01	0.8	20.2	4.6	3_Literature	0	0	0	0	0	0	0	0	0	0	0	0	0	0	0	0	0	0	0	0	0	0	0	0	0	0	0	0	0	0	0	0	0	0	0	0	0	0	0
none	none	none	Sm2O3	74.985	0.18	0.04	0.8	5.2	9.2	3_Literature	0	0	0	0	0	0	0	0	0	0	0	0	0	0	0	0	0	0	0	0	0	0	0	0	0	0	0	0	0	0	0	0	0	0	0	0	0	0	0
Al	none	none	La2O3	70.985	0.5	0.1	0.4	4.8	11.8	3_Literature	0	1	0	0	0	0	0	0	0	0	0	0	0	0	0	0	0	0	0	0	0	0	0	0	0	0	0	0	0	0	0	0	0	0	0	0	1	0	0
none	none	none	Sb2O3	77.985	0.5	0.11	0.4	4.5	2	3_Literature	0	0	0	0	0	0	0	0	0	0	0	0	0	0	0	0	0	0	0	0	0	0	0	0	0	0	0	0	0	0	0	0	0	0	0	0	0	0	0
K	none	none	Sb2O3	77.985	0.5	0.11	0.4	4.5	1.4	3_Literature	0	0	0	0	0	0	0	0	0	0	0	0	0	0	0	0	0	0	0	0	0	0	0	0	0	0	0	0	0	0	0	0	0	1	0	0	0	0	0
K	none	none	Sb2O3	77.985	0.5	0.11	0.4	4.5	2.5	3_Literature	0	0	0	0	0	0	0	0	0	0	0	0	0	0	0	0	0	0	0	0	0	0	0	0	0	0	0	0	0	0	0	0	0	1	0	0	0	0	0
K	none	none	Sb2O3	77.985	0.5	0.11	0.4	4.5	1.4	3_Literature	0	0	0	0	0	0	0	0	0	0	0	0	0	0	0	0	0	0	0	0	0	0	0	0	0	0	0	0	0	0	0	0	0	1	0	0	0	0	0
none	Sb	none	K2O	77.985	0.5	0.11	0.4	4.5	2.3	3_Literature	0	0	0	0	0	0	0	0	0	0	0	0	0	0	0	0	0	0	0	0	0	0	0	0	0	0	0	0	0	0	0	0	0	0	1	0	0	0	0
Na	none	none	Pr2O3	77.485	0.5	0.1	0.4	4.8	19.3	3_Literature	0	0	0	0	0	0	0	0	0	0	0	0	0	0	0	0	0	0	0	0	0	0	0	0	0	0	0	0	0	0	0	0	0	0	0	0	0	0	0
Na	none	none	Tb2O3	77.485	0.5	0.1	0.4	4.8	11.9	3_Literature	0	0	0	0	0	0	0	0	0	0	0	0	0	0	0	0	0	0	0	0	0	0	0	0	0	0	0	0	0	0	0	0	0	0	0	0	0	0	0
Na	none	none	CeO2	77.485	0.5	0.1	0.4	4.8	0.9	3_Literature	0	0	0	0	0	0	0	0	0	0	0	0	0	0	0	0	1	0	0	0	0	0	0	0	0	0	0	0	0	0	0	0	0	0	0	0	0	0	0
K	none	none	Pr2O3	77.485	0.5	0.1	0.4	4.8	14.6	3_Literature	0	0	0	0	0	0	0	0	0	0	0	0	0	0	0	0	0	0	0	0	0	0	0	0	0	0	0	0	0	0	0	0	0	1	0	0	0	0	0
Li	none	none	Pr2O3	77.485	0.5	0.1	0.4	4.8	7.3	3_Literature	0	0	0	0	0	0	0	0	0	0	0	0	0	0	0	0	0	0	0	0	0	0	0	0	0	0	0	0	0	0	0	0	0	0	0	0	0	1	0
Ag	none	none	Pr2O3	77.485	0.5	0.1	0.4	4.8	0.4	3_Literature	1	0	0	0	0	0	0	0	0	0	0	0	0	0	0	0	0	0	0	0	0	0	0	0	0	0	0	0	0	0	0	0	0	0	0	0	0	0	0
Mg	none	none	Pr2O3	77.485	0.5	0.1	0.4	4.8	1.2	3_Literature	0	0	0	0	0	0	0	0	0	0	0	0	0	0	0	0	0	0	0	0	0	0	0	0	0	0	0	0	0	0	0	0	0	0	0	0	0	0	0
Ca	none	none	Pr2O3	77.485	0.5	0.1	0.4	4.8	2.6	3_Literature	0	0	0	0	0	0	0	0	0	0	0	0	1	0	0	0	0	0	0	0	0	0	0	0	0	0	0	0	0	0	0	0	0	0	0	0	0	0	0
Bi	none	none	Pr2O3	77.485	0.5	0.1	0.4	4.8	5.1	3_Literature	0	0	0	0	0	0	0	0	0	0	1	0	0	0	0	0	0	0	0	0	0	0	0	0	0	0	0	0	0	0	0	0	0	0	0	0	0	0	0
Sr	none	none	Pr2O3	77.485	0.5	0.1	0.4	4.8	3.1	3_Literature	0	0	0	0	0	0	0	0	0	0	0	0	0	0	0	0	0	0	0	0	0	0	0	0	0	0	0	0	0	0	0	0	0	0	0	0	0	0	0
In	none	none	Pr2O3	77.485	0.5	0.1	0.4	4.8	0.4	3_Literature	0	0	0	0	0	0	0	0	0	0	0	0	0	0	0	0	0	0	0	0	0	0	0	0	0	0	0	0	0	0	0	0	1	0	0	0	0	0	0
none	none	none	Pr2O3	82.485	0.5	0.1	0.4	4.8	0	3_Literature	0	0	0	0	0	0	0	0	0	0	0	0	0	0	0	0	0	0	0	0	0	0	0	0	0	0	0	0	0	0	0	0	0	0	0	0	0	0	0
none	none	none	Tb2O3	82.485	0.5	0.1	0.4	4.8	0.3	3_Literature	0	0	0	0	0	0	0	0	0	0	0	0	0	0	0	0	0	0	0	0	0	0	0	0	0	0	0	0	0	0	0	0	0	0	0	0	0	0	0
none	none	none	CeO2	82.485	0.5	0.1	0.4	4.8	0	3_Literature	0	0	0	0	0	0	0	0	0	0	0	0	0	0	0	0	1	0	0	0	0	0	0	0	0	0	0	0	0	0	0	0	0	0	0	0	0	0	0
none	none	none	ZrO2	59.985	0.67	0.33	0	2	6.3	3_Literature	0	0	0	0	0	0	0	0	0	0	0	0	0	0	0	0	0	0	0	0	0	0	0	0	0	0	0	0	0	0	0	0	0	0	0	0	0	0	0
Na	W	Mn	SiO2	79.985	0.32	0.08	0.6	4	10.9	3_Literature	0	0	0	0	0	0	0	0	0	0	0	0	0	0	0	0	0	0	0	0	0	0	0	0	0	0	0	0	0	0	0	0	0	0	0	0	0	0	0
Na	W	Mn	SiO2	79.985	0.32	0.08	0.6	4	7.3	3_Literature	0	0	0	0	0	0	0	0	0	0	0	0	0	0	0	0	0	0	0	0	0	0	0	0	0	0	0	0	0	0	0	0	0	0	0	0	0	0	0
none	none	none	Sm2O3	19.985	0.71	0.29	0	2.5	7.2	3_Literature	0	0	0	0	0	0	0	0	0	0	0	0	0	0	0	0	0	0	0	0	0	0	0	0	0	0	0	0	0	0	0	0	0	0	0	0	0	0	0
W	none	none	SiO2	79.985	0.83	0.17	0	5	7.1	3_Literature	0	0	0	0	0	0	0	0	0	0	0	0	0	0	0	0	0	0	0	0	0	0	0	0	0	0	0	0	0	0	0	0	0	0	0	0	0	0	0
W	none	none	SiO2	79.985	0.5	0.11	0.4	4.8	5.9	3_Literature	0	0	0	0	0	0	0	0	0	0	0	0	0	0	0	0	0	0	0	0	0	0	0	0	0	0	0	0	0	0	0	0	0	0	0	0	0	0	0
Mn	none	none	SiO2	79.985	0.83	0.17	0	5	9.2	3_Literature	0	0	0	0	0	0	0	0	0	0	0	0	0	0	0	0	0	0	0	0	0	0	0	0	0	0	0	0	0	0	0	0	0	0	0	0	0	0	0
Mn	none	none	SiO2	79.985	0.5	0.11	0.4	4.8	8.2	3_Literature	0	0	0	0	0	0	0	0	0	0	0	0	0	0	0	0	0	0	0	0	0	0	0	0	0	0	0	0	0	0	0	0	0	0	0	0	0	0	0
Ce	none	none	SiO2	79.985	0.83	0.17	0	5	12.5	3_Literature	0	0	0	0	0	0	0	0	0	0	0	0	0	0	0	1	0	0	0	0	0	0	0	0	0	0	0	0	0	0	0	0	0	0	0	0	0	0	0
Ce	none	none	SiO2	79.985	0.5	0.11	0.4	4.8	11.3	3_Literature	0	0	0	0	0	0	0	0	0	0	0	0	0	0	0	1	0	0	0	0	0	0	0	0	0	0	0	0	0	0	0	0	0	0	0	0	0	0	0
Mn	W	none	SiO2	79.985	0.83	0.17	0	5	12	3_Literature	0	0	0	0	0	0	0	0	0	0	0	0	0	0	0	0	0	0	0	0	0	0	0	0	0	0	0	0	0	0	0	0	0	0	0	0	0	0	0
Mn	W	none	SiO2	79.985	0.5	0.11	0.4	4.8	11.5	3_Literature	0	0	0	0	0	0	0	0	0	0	0	0	0	0	0	0	0	0	0	0	0	0	0	0	0	0	0	0	0	0	0	0	0	0	0	0	0	0	0
Ce	W	none	SiO2	79.985	0.83	0.17	0	5	9.9	3_Literature	0	0	0	0	0	0	0	0	0	0	0	0	0	0	0	1	0	0	0	0	0	0	0	0	0	0	0	0	0	0	0	0	0	0	0	0	0	0	0
Ce	W	none	SiO2	79.985	0.5	0.11	0.4	4.8	7	3_Literature	0	0	0	0	0	0	0	0	0	0	0	0	0	0	0	1	0	0	0	0	0	0	0	0	0	0	0	0	0	0	0	0	0	0	0	0	0	0	0
Mn	Na	none	SiO2	79.985	0.83	0.17	0	5	17.2	3_Literature	0	0	0	0	0	0	0	0	0	0	0	0	0	0	0	0	0	0	0	0	0	0	0	0	0	0	0	0	0	0	0	0	0	0	0	0	0	0	0
Mn	Na	none	SiO2	79.985	0.5	0.11	0.4	4.8	13.6	3_Literature	0	0	0	0	0	0	0	0	0	0	0	0	0	0	0	0	0	0	0	0	0	0	0	0	0	0	0	0	0	0	0	0	0	0	0	0	0	0	0
Ce	Na	none	SiO2	79.985	0.83	0.17	0	5	12.5	3_Literature	0	0	0	0	0	0	0	0	0	0	0	0	0	0	0	1	0	0	0	0	0	0	0	0	0	0	0	0	0	0	0	0	0	0	0	0	0	0	0
Ce	Na	none	SiO2	79.985	0.5	0.11	0.4	4.8	12.4	3_Literature	0	0	0	0	0	0	0	0	0	0	0	0	0	0	0	1	0	0	0	0	0	0	0	0	0	0	0	0	0	0	0	0	0	0	0	0	0	0	0
Na	W	none	SiO2	79.985	0.83	0.17	0	5	16.4	3_Literature	0	0	0	0	0	0	0	0	0	0	0	0	0	0	0	0	0	0	0	0	0	0	0	0	0	0	0	0	0	0	0	0	0	0	0	0	0	0	0
Na	W	none	SiO2	79.985	0.5	0.11	0.4	4.8	14.8	3_Literature	0	0	0	0	0	0	0	0	0	0	0	0	0	0	0	0	0	0	0	0	0	0	0	0	0	0	0	0	0	0	0	0	0	0	0	0	0	0	0
Na	W	Mn	SiO2	79.985	0.83	0.17	0	5	23.4	3_Literature	0	0	0	0	0	0	0	0	0	0	0	0	0	0	0	0	0	0	0	0	0	0	0	0	0	0	0	0	0	0	0	0	0	0	0	0	0	0	0
Na	W	Mn	SiO2	79.985	0.5	0.11	0.4	4.8	20.1	3_Literature	0	0	0	0	0	0	0	0	0	0	0	0	0	0	0	0	0	0	0	0	0	0	0	0	0	0	0	0	0	0	0	0	0	0	0	0	0	0	0
Na	W	Ce	SiO2	79.985	0.83	0.17	0	5	22	3_Literature	0	0	0	0	0	0	0	0	0	0	0	0	0	0	0	1	0	0	0	0	0	0	0	0	0	0	0	0	0	0	0	0	0	0	0	0	0	0	0
Na	W	Ce	SiO2	79.985	0.5	0.11	0.4	4.8	20	3_Literature	0	0	0	0	0	0	0	0	0	0	0	0	0	0	0	1	0	0	0	0	0	0	0	0	0	0	0	0	0	0	0	0	0	0	0	0	0	0	0
La	none	none	MgO	79.985	0.21	0.05	0.7	4	2.9	3_Literature	0	0	0	0	0	0	0	0	0	0	0	0	0	0	0	0	0	0	0	0	0	0	0	0	0	0	0	0	0	0	0	0	0	0	0	1	0	0	0
La	none	none	MgO	79.985	0.21	0.05	0.7	4	2.8	3_Literature	0	0	0	0	0	0	0	0	0	0	0	0	0	0	0	0	0	0	0	0	0	0	0	0	0	0	0	0	0	0	0	0	0	0	0	1	0	0	0
La	none	none	MgO	79.985	0.21	0.05	0.7	4	3.7	3_Literature	0	0	0	0	0	0	0	0	0	0	0	0	0	0	0	0	0	0	0	0	0	0	0	0	0	0	0	0	0	0	0	0	0	0	0	1	0	0	0
La	none	none	MgO	79.985	0.21	0.05	0.7	4	3.9	3_Literature	0	0	0	0	0	0	0	0	0	0	0	0	0	0	0	0	0	0	0	0	0	0	0	0	0	0	0	0	0	0	0	0	0	0	0	1	0	0	0
Li	Ce	none	MgO	69.985	0.5	0.1	0.4	5	3.7	3_Literature	0	0	0	0	0	0	0	0	0	0	0	0	0	0	0	1	0	0	0	0	0	0	0	0	0	0	0	0	0	0	0	0	0	0	0	0	0	1	0
Li	Ce	none	MgO	74.985	0.5	0.1	0.4	5	7.8	3_Literature	0	0	0	0	0	0	0	0	0	0	0	0	0	0	0	1	0	0	0	0	0	0	0	0	0	0	0	0	0	0	0	0	0	0	0	0	0	1	0
Li	Ce	none	MgO	79.985	0.5	0.1	0.4	5	13.9	3_Literature	0	0	0	0	0	0	0	0	0	0	0	0	0	0	0	1	0	0	0	0	0	0	0	0	0	0	0	0	0	0	0	0	0	0	0	0	0	1	0
Li	none	none	MgO	69.985	0.5	0.1	0.4	5	2	3_Literature	0	0	0	0	0	0	0	0	0	0	0	0	0	0	0	0	0	0	0	0	0	0	0	0	0	0	0	0	0	0	0	0	0	0	0	0	0	1	0
Li	none	none	MgO	74.985	0.5	0.1	0.4	5	5.4	3_Literature	0	0	0	0	0	0	0	0	0	0	0	0	0	0	0	0	0	0	0	0	0	0	0	0	0	0	0	0	0	0	0	0	0	0	0	0	0	1	0
Li	none	none	MgO	79.985	0.5	0.1	0.4	5	9.7	3_Literature	0	0	0	0	0	0	0	0	0	0	0	0	0	0	0	0	0	0	0	0	0	0	0	0	0	0	0	0	0	0	0	0	0	0	0	0	0	1	0
Na	Ce	none	MgO	69.985	0.5	0.1	0.4	5	1	3_Literature	0	0	0	0	0	0	0	0	0	0	0	0	0	0	0	1	0	0	0	0	0	0	0	0	0	0	0	0	0	0	0	0	0	0	0	0	0	0	0
Na	Ce	none	MgO	74.985	0.5	0.1	0.4	5	3.5	3_Literature	0	0	0	0	0	0	0	0	0	0	0	0	0	0	0	1	0	0	0	0	0	0	0	0	0	0	0	0	0	0	0	0	0	0	0	0	0	0	0
Na	Ce	none	MgO	79.985	0.5	0.1	0.4	5	7.7	3_Literature	0	0	0	0	0	0	0	0	0	0	0	0	0	0	0	1	0	0	0	0	0	0	0	0	0	0	0	0	0	0	0	0	0	0	0	0	0	0	0
Na	none	none	MgO	69.985	0.5	0.1	0.4	5	0.4	3_Literature	0	0	0	0	0	0	0	0	0	0	0	0	0	0	0	0	0	0	0	0	0	0	0	0	0	0	0	0	0	0	0	0	0	0	0	0	0	0	0
Na	none	none	MgO	74.985	0.5	0.1	0.4	5	1.4	3_Literature	0	0	0	0	0	0	0	0	0	0	0	0	0	0	0	0	0	0	0	0	0	0	0	0	0	0	0	0	0	0	0	0	0	0	0	0	0	0	0
Na	none	none	MgO	79.985	0.5	0.1	0.4	5	4.6	3_Literature	0	0	0	0	0	0	0	0	0	0	0	0	0	0	0	0	0	0	0	0	0	0	0	0	0	0	0	0	0	0	0	0	0	0	0	0	0	0	0
none	none	none	La2O3	79.985	0.29	0.07	0.6	4	5.9	3_Literature	0	0	0	0	0	0	0	0	0	0	0	0	0	0	0	0	0	0	0	0	0	0	0	0	0	0	0	0	0	0	0	0	0	0	0	0	1	0	0
none	none	none	Sm2O3	79.985	0.29	0.07	0.6	4	6.2	3_Literature	0	0	0	0	0	0	0	0	0	0	0	0	0	0	0	0	0	0	0	0	0	0	0	0	0	0	0	0	0	0	0	0	0	0	0	0	0	0	0
none	none	none	MgO	79.985	0.29	0.07	0.6	4	7.5	3_Literature	0	0	0	0	0	0	0	0	0	0	0	0	0	0	0	0	0	0	0	0	0	0	0	0	0	0	0	0	0	0	0	0	0	0	0	0	0	0	0
none	none	none	CaO	79.985	0.29	0.07	0.6	4	5.3	3_Literature	0	0	0	0	0	0	0	0	0	0	0	0	0	1	0	0	0	0	0	0	0	0	0	0	0	0	0	0	0	0	0	0	0	0	0	0	0	0	0
La	none	none	CaO	79.985	0.8	0.2	0	4	14.8	3_Literature	0	0	0	0	0	0	0	0	0	0	0	0	0	1	0	0	0	0	0	0	0	0	0	0	0	0	0	0	0	0	0	0	0	0	0	1	0	0	0
La	none	none	CaO	79.985	0.8	0.2	0	4	15.1	3_Literature	0	0	0	0	0	0	0	0	0	0	0	0	0	1	0	0	0	0	0	0	0	0	0	0	0	0	0	0	0	0	0	0	0	0	0	1	0	0	0
La	none	none	CaO	79.985	0.8	0.2	0	4	15.4	3_Literature	0	0	0	0	0	0	0	0	0	0	0	0	0	1	0	0	0	0	0	0	0	0	0	0	0	0	0	0	0	0	0	0	0	0	0	1	0	0	0
La	none	none	CaO	79.985	0.8	0.2	0	4	14.3	3_Literature	0	0	0	0	0	0	0	0	0	0	0	0	0	1	0	0	0	0	0	0	0	0	0	0	0	0	0	0	0	0	0	0	0	0	0	1	0	0	0
La	none	none	CaO	79.985	0.8	0.2	0	4	12.8	3_Literature	0	0	0	0	0	0	0	0	0	0	0	0	0	1	0	0	0	0	0	0	0	0	0	0	0	0	0	0	0	0	0	0	0	0	0	1	0	0	0
La	none	none	CaO	79.985	0.8	0.2	0	4	10.8	3_Literature	0	0	0	0	0	0	0	0	0	0	0	0	0	1	0	0	0	0	0	0	0	0	0	0	0	0	0	0	0	0	0	0	0	0	0	1	0	0	0
La	none	none	CaO	79.985	0.8	0.2	0	4	14.5	3_Literature	0	0	0	0	0	0	0	0	0	0	0	0	0	1	0	0	0	0	0	0	0	0	0	0	0	0	0	0	0	0	0	0	0	0	0	1	0	0	0
La	none	none	CaO	84.985	0.8	0.2	0	4	13.5	3_Literature	0	0	0	0	0	0	0	0	0	0	0	0	0	1	0	0	0	0	0	0	0	0	0	0	0	0	0	0	0	0	0	0	0	0	0	1	0	0	0
La	none	none	CaO	84.985	0.8	0.2	0	4	15.2	3_Literature	0	0	0	0	0	0	0	0	0	0	0	0	0	1	0	0	0	0	0	0	0	0	0	0	0	0	0	0	0	0	0	0	0	0	0	1	0	0	0
La	none	none	CaO	84.985	0.8	0.2	0	4	14.1	3_Literature	0	0	0	0	0	0	0	0	0	0	0	0	0	1	0	0	0	0	0	0	0	0	0	0	0	0	0	0	0	0	0	0	0	0	0	1	0	0	0
La	none	none	CaO	84.985	0.89	0.11	0	8	12.4	3_Literature	0	0	0	0	0	0	0	0	0	0	0	0	0	1	0	0	0	0	0	0	0	0	0	0	0	0	0	0	0	0	0	0	0	0	0	1	0	0	0
La	none	none	CaO	84.985	0.89	0.11	0	8	13.5	3_Literature	0	0	0	0	0	0	0	0	0	0	0	0	0	1	0	0	0	0	0	0	0	0	0	0	0	0	0	0	0	0	0	0	0	0	0	1	0	0	0
La	none	none	CaO	84.985	0.89	0.11	0	8	12.6	3_Literature	0	0	0	0	0	0	0	0	0	0	0	0	0	1	0	0	0	0	0	0	0	0	0	0	0	0	0	0	0	0	0	0	0	0	0	1	0	0	0
La	none	none	CaO	79.985	0.89	0.11	0	8	13.4	3_Literature	0	0	0	0	0	0	0	0	0	0	0	0	0	1	0	0	0	0	0	0	0	0	0	0	0	0	0	0	0	0	0	0	0	0	0	1	0	0	0
La	none	none	CaO	79.985	0.89	0.11	0	8	12.6	3_Literature	0	0	0	0	0	0	0	0	0	0	0	0	0	1	0	0	0	0	0	0	0	0	0	0	0	0	0	0	0	0	0	0	0	0	0	1	0	0	0
La	none	none	CaO	79.985	0.89	0.11	0	8	9.8	3_Literature	0	0	0	0	0	0	0	0	0	0	0	0	0	1	0	0	0	0	0	0	0	0	0	0	0	0	0	0	0	0	0	0	0	0	0	1	0	0	0
La	none	none	CaO	74.985	0.8	0.2	0	4	15.5	3_Literature	0	0	0	0	0	0	0	0	0	0	0	0	0	1	0	0	0	0	0	0	0	0	0	0	0	0	0	0	0	0	0	0	0	0	0	1	0	0	0
La	none	none	CaO	74.985	0.8	0.2	0	4	14.3	3_Literature	0	0	0	0	0	0	0	0	0	0	0	0	0	1	0	0	0	0	0	0	0	0	0	0	0	0	0	0	0	0	0	0	0	0	0	1	0	0	0
La	none	none	CaO	74.985	0.8	0.2	0	4	14.9	3_Literature	0	0	0	0	0	0	0	0	0	0	0	0	0	1	0	0	0	0	0	0	0	0	0	0	0	0	0	0	0	0	0	0	0	0	0	1	0	0	0
La	none	none	CaO	79.985	0.8	0.2	0	4	15.1	3_Literature	0	0	0	0	0	0	0	0	0	0	0	0	0	1	0	0	0	0	0	0	0	0	0	0	0	0	0	0	0	0	0	0	0	0	0	1	0	0	0
La	none	none	CaO	79.985	0.8	0.2	0	4	8.5	3_Literature	0	0	0	0	0	0	0	0	0	0	0	0	0	1	0	0	0	0	0	0	0	0	0	0	0	0	0	0	0	0	0	0	0	0	0	1	0	0	0
La	none	none	CaO	79.985	0.89	0.11	0	8	13.4	3_Literature	0	0	0	0	0	0	0	0	0	0	0	0	0	1	0	0	0	0	0	0	0	0	0	0	0	0	0	0	0	0	0	0	0	0	0	1	0	0	0
La	none	none	CaO	79.985	0.89	0.11	0	8	14.4	3_Literature	0	0	0	0	0	0	0	0	0	0	0	0	0	1	0	0	0	0	0	0	0	0	0	0	0	0	0	0	0	0	0	0	0	0	0	1	0	0	0
La	none	none	CaO	79.985	0.8	0.2	0	4	12	3_Literature	0	0	0	0	0	0	0	0	0	0	0	0	0	1	0	0	0	0	0	0	0	0	0	0	0	0	0	0	0	0	0	0	0	0	0	1	0	0	0
La	none	none	CaO	79.985	0.8	0.2	0	4	14	3_Literature	0	0	0	0	0	0	0	0	0	0	0	0	0	1	0	0	0	0	0	0	0	0	0	0	0	0	0	0	0	0	0	0	0	0	0	1	0	0	0
La	none	none	CaO	79.985	0.8	0.2	0	4	15.2	3_Literature	0	0	0	0	0	0	0	0	0	0	0	0	0	1	0	0	0	0	0	0	0	0	0	0	0	0	0	0	0	0	0	0	0	0	0	1	0	0	0
La	none	none	CaO	79.985	0.8	0.2	0	4	7.9	3_Literature	0	0	0	0	0	0	0	0	0	0	0	0	0	1	0	0	0	0	0	0	0	0	0	0	0	0	0	0	0	0	0	0	0	0	0	1	0	0	0
La	none	none	CaO	79.985	0.89	0.11	0	8	12.3	3_Literature	0	0	0	0	0	0	0	0	0	0	0	0	0	1	0	0	0	0	0	0	0	0	0	0	0	0	0	0	0	0	0	0	0	0	0	1	0	0	0
La	none	none	CaO	79.985	0.89	0.11	0	8	11.5	3_Literature	0	0	0	0	0	0	0	0	0	0	0	0	0	1	0	0	0	0	0	0	0	0	0	0	0	0	0	0	0	0	0	0	0	0	0	1	0	0	0
La	none	none	CaO	79.985	0.8	0.2	0	4	12	3_Literature	0	0	0	0	0	0	0	0	0	0	0	0	0	1	0	0	0	0	0	0	0	0	0	0	0	0	0	0	0	0	0	0	0	0	0	1	0	0	0
La	none	none	CaO	79.985	0.8	0.2	0	4	15.2	3_Literature	0	0	0	0	0	0	0	0	0	0	0	0	0	1	0	0	0	0	0	0	0	0	0	0	0	0	0	0	0	0	0	0	0	0	0	1	0	0	0
Na	W	Mn	SiO2	79.985	0.71	0.29	0	2.5	10.1	3_Literature	0	0	0	0	0	0	0	0	0	0	0	0	0	0	0	0	0	0	0	0	0	0	0	0	0	0	0	0	0	0	0	0	0	0	0	0	0	0	0
Na	W	Mn	SiO2	79.985	0.71	0.29	0	2.5	17.8	3_Literature	0	0	0	0	0	0	0	0	0	0	0	0	0	0	0	0	0	0	0	0	0	0	0	0	0	0	0	0	0	0	0	0	0	0	0	0	0	0	0
none	Be	none	Nd2O3	54.985	0.42	0.08	0.5	5	1.1	3_Literature	0	0	0	0	0	0	0	0	1	0	0	0	0	0	0	0	0	0	0	0	0	0	0	0	0	0	0	0	0	0	0	0	0	0	0	0	0	0	0
none	Be	none	Nd2O3	57.485	0.42	0.08	0.5	5	1.8	3_Literature	0	0	0	0	0	0	0	0	1	0	0	0	0	0	0	0	0	0	0	0	0	0	0	0	0	0	0	0	0	0	0	0	0	0	0	0	0	0	0
none	Be	none	Nd2O3	59.985	0.42	0.08	0.5	5	2.9	3_Literature	0	0	0	0	0	0	0	0	1	0	0	0	0	0	0	0	0	0	0	0	0	0	0	0	0	0	0	0	0	0	0	0	0	0	0	0	0	0	0
none	Be	none	Nd2O3	62.485	0.42	0.08	0.5	5	4.3	3_Literature	0	0	0	0	0	0	0	0	1	0	0	0	0	0	0	0	0	0	0	0	0	0	0	0	0	0	0	0	0	0	0	0	0	0	0	0	0	0	0
none	Be	none	Nd2O3	64.985	0.42	0.08	0.5	5	5.9	3_Literature	0	0	0	0	0	0	0	0	1	0	0	0	0	0	0	0	0	0	0	0	0	0	0	0	0	0	0	0	0	0	0	0	0	0	0	0	0	0	0
none	Be	none	Nd2O3	67.485	0.42	0.08	0.5	5	6.6	3_Literature	0	0	0	0	0	0	0	0	1	0	0	0	0	0	0	0	0	0	0	0	0	0	0	0	0	0	0	0	0	0	0	0	0	0	0	0	0	0	0
none	Be	none	Nd2O3	69.985	0.42	0.08	0.5	5	7.3	3_Literature	0	0	0	0	0	0	0	0	1	0	0	0	0	0	0	0	0	0	0	0	0	0	0	0	0	0	0	0	0	0	0	0	0	0	0	0	0	0	0
none	Be	none	Nd2O3	72.485	0.42	0.08	0.5	5	7.7	3_Literature	0	0	0	0	0	0	0	0	1	0	0	0	0	0	0	0	0	0	0	0	0	0	0	0	0	0	0	0	0	0	0	0	0	0	0	0	0	0	0
none	Be	none	Nd2O3	74.985	0.42	0.08	0.5	5	8.2	3_Literature	0	0	0	0	0	0	0	0	1	0	0	0	0	0	0	0	0	0	0	0	0	0	0	0	0	0	0	0	0	0	0	0	0	0	0	0	0	0	0
none	Be	none	Nd2O3	77.485	0.42	0.08	0.5	5	8.7	3_Literature	0	0	0	0	0	0	0	0	1	0	0	0	0	0	0	0	0	0	0	0	0	0	0	0	0	0	0	0	0	0	0	0	0	0	0	0	0	0	0
none	Be	none	Nd2O3	79.985	0.42	0.08	0.5	5	8.5	3_Literature	0	0	0	0	0	0	0	0	1	0	0	0	0	0	0	0	0	0	0	0	0	0	0	0	0	0	0	0	0	0	0	0	0	0	0	0	0	0	0
none	Be	none	Nd2O3	82.485	0.42	0.08	0.5	5	7.8	3_Literature	0	0	0	0	0	0	0	0	1	0	0	0	0	0	0	0	0	0	0	0	0	0	0	0	0	0	0	0	0	0	0	0	0	0	0	0	0	0	0
none	Be	none	Nd2O3	84.985	0.42	0.08	0.5	5	6.2	3_Literature	0	0	0	0	0	0	0	0	1	0	0	0	0	0	0	0	0	0	0	0	0	0	0	0	0	0	0	0	0	0	0	0	0	0	0	0	0	0	0
none	Mg	none	Nd2O3	54.985	0.42	0.08	0.5	5	1.9	3_Literature	0	0	0	0	0	0	0	0	0	0	0	0	0	0	0	0	0	0	0	0	0	0	0	0	0	0	0	0	0	0	0	0	0	0	0	0	0	0	0
none	Mg	none	Nd2O3	57.485	0.42	0.08	0.5	5	2.7	3_Literature	0	0	0	0	0	0	0	0	0	0	0	0	0	0	0	0	0	0	0	0	0	0	0	0	0	0	0	0	0	0	0	0	0	0	0	0	0	0	0
none	Mg	none	Nd2O3	59.985	0.42	0.08	0.5	5	3.2	3_Literature	0	0	0	0	0	0	0	0	0	0	0	0	0	0	0	0	0	0	0	0	0	0	0	0	0	0	0	0	0	0	0	0	0	0	0	0	0	0	0
none	Mg	none	Nd2O3	62.485	0.42	0.08	0.5	5	3.9	3_Literature	0	0	0	0	0	0	0	0	0	0	0	0	0	0	0	0	0	0	0	0	0	0	0	0	0	0	0	0	0	0	0	0	0	0	0	0	0	0	0
none	Mg	none	Nd2O3	64.985	0.42	0.08	0.5	5	4.7	3_Literature	0	0	0	0	0	0	0	0	0	0	0	0	0	0	0	0	0	0	0	0	0	0	0	0	0	0	0	0	0	0	0	0	0	0	0	0	0	0	0
none	Mg	none	Nd2O3	67.485	0.42	0.08	0.5	5	5.7	3_Literature	0	0	0	0	0	0	0	0	0	0	0	0	0	0	0	0	0	0	0	0	0	0	0	0	0	0	0	0	0	0	0	0	0	0	0	0	0	0	0
none	Mg	none	Nd2O3	69.985	0.42	0.08	0.5	5	6.8	3_Literature	0	0	0	0	0	0	0	0	0	0	0	0	0	0	0	0	0	0	0	0	0	0	0	0	0	0	0	0	0	0	0	0	0	0	0	0	0	0	0
none	Mg	none	Nd2O3	72.485	0.42	0.08	0.5	5	7.9	3_Literature	0	0	0	0	0	0	0	0	0	0	0	0	0	0	0	0	0	0	0	0	0	0	0	0	0	0	0	0	0	0	0	0	0	0	0	0	0	0	0
none	Mg	none	Nd2O3	74.985	0.42	0.08	0.5	5	9.2	3_Literature	0	0	0	0	0	0	0	0	0	0	0	0	0	0	0	0	0	0	0	0	0	0	0	0	0	0	0	0	0	0	0	0	0	0	0	0	0	0	0
none	Mg	none	Nd2O3	77.485	0.42	0.08	0.5	5	10.7	3_Literature	0	0	0	0	0	0	0	0	0	0	0	0	0	0	0	0	0	0	0	0	0	0	0	0	0	0	0	0	0	0	0	0	0	0	0	0	0	0	0
none	Mg	none	Nd2O3	79.985	0.42	0.08	0.5	5	9.9	3_Literature	0	0	0	0	0	0	0	0	0	0	0	0	0	0	0	0	0	0	0	0	0	0	0	0	0	0	0	0	0	0	0	0	0	0	0	0	0	0	0
none	Mg	none	Nd2O3	82.485	0.42	0.08	0.5	5	8.7	3_Literature	0	0	0	0	0	0	0	0	0	0	0	0	0	0	0	0	0	0	0	0	0	0	0	0	0	0	0	0	0	0	0	0	0	0	0	0	0	0	0
none	Mg	none	Nd2O3	84.985	0.42	0.08	0.5	5	7.6	3_Literature	0	0	0	0	0	0	0	0	0	0	0	0	0	0	0	0	0	0	0	0	0	0	0	0	0	0	0	0	0	0	0	0	0	0	0	0	0	0	0
none	Ca	none	CaO	54.985	0.42	0.08	0.5	5	0.4	3_Literature	0	0	0	0	0	0	0	0	0	0	0	0	1	1	0	0	0	0	0	0	0	0	0	0	0	0	0	0	0	0	0	0	0	0	0	0	0	0	0
none	Ca	none	CaO	57.485	0.42	0.08	0.5	5	0.7	3_Literature	0	0	0	0	0	0	0	0	0	0	0	0	1	1	0	0	0	0	0	0	0	0	0	0	0	0	0	0	0	0	0	0	0	0	0	0	0	0	0
none	Ca	none	CaO	59.985	0.42	0.08	0.5	5	1.3	3_Literature	0	0	0	0	0	0	0	0	0	0	0	0	1	1	0	0	0	0	0	0	0	0	0	0	0	0	0	0	0	0	0	0	0	0	0	0	0	0	0
none	Ca	none	CaO	62.485	0.42	0.08	0.5	5	2.1	3_Literature	0	0	0	0	0	0	0	0	0	0	0	0	1	1	0	0	0	0	0	0	0	0	0	0	0	0	0	0	0	0	0	0	0	0	0	0	0	0	0
none	Ca	none	CaO	64.985	0.42	0.08	0.5	5	3.5	3_Literature	0	0	0	0	0	0	0	0	0	0	0	0	1	1	0	0	0	0	0	0	0	0	0	0	0	0	0	0	0	0	0	0	0	0	0	0	0	0	0
none	Ca	none	CaO	67.485	0.42	0.08	0.5	5	4.6	3_Literature	0	0	0	0	0	0	0	0	0	0	0	0	1	1	0	0	0	0	0	0	0	0	0	0	0	0	0	0	0	0	0	0	0	0	0	0	0	0	0
none	Ca	none	CaO	69.985	0.42	0.08	0.5	5	6.4	3_Literature	0	0	0	0	0	0	0	0	0	0	0	0	1	1	0	0	0	0	0	0	0	0	0	0	0	0	0	0	0	0	0	0	0	0	0	0	0	0	0
none	Ca	none	CaO	72.485	0.42	0.08	0.5	5	8.4	3_Literature	0	0	0	0	0	0	0	0	0	0	0	0	1	1	0	0	0	0	0	0	0	0	0	0	0	0	0	0	0	0	0	0	0	0	0	0	0	0	0
none	Ca	none	CaO	74.985	0.42	0.08	0.5	5	9.5	3_Literature	0	0	0	0	0	0	0	0	0	0	0	0	1	1	0	0	0	0	0	0	0	0	0	0	0	0	0	0	0	0	0	0	0	0	0	0	0	0	0
none	Ca	none	CaO	77.485	0.42	0.08	0.5	5	10.4	3_Literature	0	0	0	0	0	0	0	0	0	0	0	0	1	1	0	0	0	0	0	0	0	0	0	0	0	0	0	0	0	0	0	0	0	0	0	0	0	0	0
none	Ca	none	CaO	79.985	0.42	0.08	0.5	5	9.6	3_Literature	0	0	0	0	0	0	0	0	0	0	0	0	1	1	0	0	0	0	0	0	0	0	0	0	0	0	0	0	0	0	0	0	0	0	0	0	0	0	0
none	Ca	none	CaO	82.485	0.42	0.08	0.5	5	8.5	3_Literature	0	0	0	0	0	0	0	0	0	0	0	0	1	1	0	0	0	0	0	0	0	0	0	0	0	0	0	0	0	0	0	0	0	0	0	0	0	0	0
none	Ca	none	CaO	84.985	0.42	0.08	0.5	5	7.6	3_Literature	0	0	0	0	0	0	0	0	0	0	0	0	1	1	0	0	0	0	0	0	0	0	0	0	0	0	0	0	0	0	0	0	0	0	0	0	0	0	0
none	Sr	none	Nd2O3	54.985	0.42	0.08	0.5	5	1.1	3_Literature	0	0	0	0	0	0	0	0	0	0	0	0	0	0	0	0	0	0	0	0	0	0	0	0	0	0	0	0	0	0	0	0	0	0	0	0	0	0	0
none	Sr	none	Nd2O3	57.485	0.42	0.08	0.5	5	2.4	3_Literature	0	0	0	0	0	0	0	0	0	0	0	0	0	0	0	0	0	0	0	0	0	0	0	0	0	0	0	0	0	0	0	0	0	0	0	0	0	0	0
none	Sr	none	Nd2O3	59.985	0.42	0.08	0.5	5	3.8	3_Literature	0	0	0	0	0	0	0	0	0	0	0	0	0	0	0	0	0	0	0	0	0	0	0	0	0	0	0	0	0	0	0	0	0	0	0	0	0	0	0
none	Sr	none	Nd2O3	62.485	0.42	0.08	0.5	5	5.5	3_Literature	0	0	0	0	0	0	0	0	0	0	0	0	0	0	0	0	0	0	0	0	0	0	0	0	0	0	0	0	0	0	0	0	0	0	0	0	0	0	0
none	Sr	none	Nd2O3	64.985	0.42	0.08	0.5	5	6.7	3_Literature	0	0	0	0	0	0	0	0	0	0	0	0	0	0	0	0	0	0	0	0	0	0	0	0	0	0	0	0	0	0	0	0	0	0	0	0	0	0	0
none	Sr	none	Nd2O3	67.485	0.42	0.08	0.5	5	7.9	3_Literature	0	0	0	0	0	0	0	0	0	0	0	0	0	0	0	0	0	0	0	0	0	0	0	0	0	0	0	0	0	0	0	0	0	0	0	0	0	0	0
none	Sr	none	Nd2O3	69.985	0.42	0.08	0.5	5	9.2	3_Literature	0	0	0	0	0	0	0	0	0	0	0	0	0	0	0	0	0	0	0	0	0	0	0	0	0	0	0	0	0	0	0	0	0	0	0	0	0	0	0
none	Sr	none	Nd2O3	72.485	0.42	0.08	0.5	5	10.6	3_Literature	0	0	0	0	0	0	0	0	0	0	0	0	0	0	0	0	0	0	0	0	0	0	0	0	0	0	0	0	0	0	0	0	0	0	0	0	0	0	0
none	Sr	none	Nd2O3	74.985	0.42	0.08	0.5	5	11.5	3_Literature	0	0	0	0	0	0	0	0	0	0	0	0	0	0	0	0	0	0	0	0	0	0	0	0	0	0	0	0	0	0	0	0	0	0	0	0	0	0	0
none	Sr	none	Nd2O3	77.485	0.42	0.08	0.5	5	11.8	3_Literature	0	0	0	0	0	0	0	0	0	0	0	0	0	0	0	0	0	0	0	0	0	0	0	0	0	0	0	0	0	0	0	0	0	0	0	0	0	0	0
none	Sr	none	Nd2O3	79.985	0.42	0.08	0.5	5	11.1	3_Literature	0	0	0	0	0	0	0	0	0	0	0	0	0	0	0	0	0	0	0	0	0	0	0	0	0	0	0	0	0	0	0	0	0	0	0	0	0	0	0
none	Sr	none	Nd2O3	82.485	0.42	0.08	0.5	5	10.4	3_Literature	0	0	0	0	0	0	0	0	0	0	0	0	0	0	0	0	0	0	0	0	0	0	0	0	0	0	0	0	0	0	0	0	0	0	0	0	0	0	0
none	Sr	none	Nd2O3	84.985	0.42	0.08	0.5	5	9.1	3_Literature	0	0	0	0	0	0	0	0	0	0	0	0	0	0	0	0	0	0	0	0	0	0	0	0	0	0	0	0	0	0	0	0	0	0	0	0	0	0	0
Na	W	Mn	SiO2	74.985	0.4	0.1	0.5	4	6.1	3_Literature	0	0	0	0	0	0	0	0	0	0	0	0	0	0	0	0	0	0	0	0	0	0	0	0	0	0	0	0	0	0	0	0	0	0	0	0	0	0	0
none	none	none	SiO2	79.985	0.4	0.1	0.5	4	0.7	3_Literature	0	0	0	0	0	0	0	0	0	0	0	0	0	0	0	0	0	0	0	0	0	0	0	0	0	0	0	0	0	0	0	0	0	0	0	0	0	0	0
Sr	none	none	Sm2O3	54.985	0.42	0.08	0.5	5	3.1	3_Literature	0	0	0	0	0	0	0	0	0	0	0	0	0	0	0	0	0	0	0	0	0	0	0	0	0	0	0	0	0	0	0	0	0	0	0	0	0	0	0
Sr	none	none	Sm2O3	57.485	0.42	0.08	0.5	5	4.5	3_Literature	0	0	0	0	0	0	0	0	0	0	0	0	0	0	0	0	0	0	0	0	0	0	0	0	0	0	0	0	0	0	0	0	0	0	0	0	0	0	0
Sr	none	none	Sm2O3	59.985	0.42	0.08	0.5	5	6.5	3_Literature	0	0	0	0	0	0	0	0	0	0	0	0	0	0	0	0	0	0	0	0	0	0	0	0	0	0	0	0	0	0	0	0	0	0	0	0	0	0	0
Sr	none	none	Sm2O3	62.485	0.42	0.08	0.5	5	8.2	3_Literature	0	0	0	0	0	0	0	0	0	0	0	0	0	0	0	0	0	0	0	0	0	0	0	0	0	0	0	0	0	0	0	0	0	0	0	0	0	0	0
Sr	none	none	Sm2O3	64.985	0.42	0.08	0.5	5	10.3	3_Literature	0	0	0	0	0	0	0	0	0	0	0	0	0	0	0	0	0	0	0	0	0	0	0	0	0	0	0	0	0	0	0	0	0	0	0	0	0	0	0
Sr	none	none	Sm2O3	67.485	0.42	0.08	0.5	5	12.5	3_Literature	0	0	0	0	0	0	0	0	0	0	0	0	0	0	0	0	0	0	0	0	0	0	0	0	0	0	0	0	0	0	0	0	0	0	0	0	0	0	0
Sr	none	none	Sm2O3	69.985	0.42	0.08	0.5	5	14.1	3_Literature	0	0	0	0	0	0	0	0	0	0	0	0	0	0	0	0	0	0	0	0	0	0	0	0	0	0	0	0	0	0	0	0	0	0	0	0	0	0	0
Sr	none	none	Sm2O3	72.485	0.42	0.08	0.5	5	15.1	3_Literature	0	0	0	0	0	0	0	0	0	0	0	0	0	0	0	0	0	0	0	0	0	0	0	0	0	0	0	0	0	0	0	0	0	0	0	0	0	0	0
Sr	none	none	Sm2O3	74.985	0.42	0.08	0.5	5	15.7	3_Literature	0	0	0	0	0	0	0	0	0	0	0	0	0	0	0	0	0	0	0	0	0	0	0	0	0	0	0	0	0	0	0	0	0	0	0	0	0	0	0
Sr	none	none	Sm2O3	77.485	0.42	0.08	0.5	5	15.4	3_Literature	0	0	0	0	0	0	0	0	0	0	0	0	0	0	0	0	0	0	0	0	0	0	0	0	0	0	0	0	0	0	0	0	0	0	0	0	0	0	0
Sr	none	none	Sm2O3	79.985	0.42	0.08	0.5	5	13.8	3_Literature	0	0	0	0	0	0	0	0	0	0	0	0	0	0	0	0	0	0	0	0	0	0	0	0	0	0	0	0	0	0	0	0	0	0	0	0	0	0	0
Sr	none	none	Sm2O3	82.485	0.42	0.08	0.5	5	12.2	3_Literature	0	0	0	0	0	0	0	0	0	0	0	0	0	0	0	0	0	0	0	0	0	0	0	0	0	0	0	0	0	0	0	0	0	0	0	0	0	0	0
Sr	none	none	Sm2O3	84.985	0.42	0.08	0.5	5	9.6	3_Literature	0	0	0	0	0	0	0	0	0	0	0	0	0	0	0	0	0	0	0	0	0	0	0	0	0	0	0	0	0	0	0	0	0	0	0	0	0	0	0
Ca	none	none	Sm2O3	54.985	0.42	0.08	0.5	5	2.5	3_Literature	0	0	0	0	0	0	0	0	0	0	0	0	1	0	0	0	0	0	0	0	0	0	0	0	0	0	0	0	0	0	0	0	0	0	0	0	0	0	0
Ca	none	none	Sm2O3	57.485	0.42	0.08	0.5	5	3.1	3_Literature	0	0	0	0	0	0	0	0	0	0	0	0	1	0	0	0	0	0	0	0	0	0	0	0	0	0	0	0	0	0	0	0	0	0	0	0	0	0	0
Ca	none	none	Sm2O3	59.985	0.42	0.08	0.5	5	3.9	3_Literature	0	0	0	0	0	0	0	0	0	0	0	0	1	0	0	0	0	0	0	0	0	0	0	0	0	0	0	0	0	0	0	0	0	0	0	0	0	0	0
Ca	none	none	Sm2O3	62.485	0.42	0.08	0.5	5	5.1	3_Literature	0	0	0	0	0	0	0	0	0	0	0	0	1	0	0	0	0	0	0	0	0	0	0	0	0	0	0	0	0	0	0	0	0	0	0	0	0	0	0
Ca	none	none	Sm2O3	64.985	0.42	0.08	0.5	5	6.1	3_Literature	0	0	0	0	0	0	0	0	0	0	0	0	1	0	0	0	0	0	0	0	0	0	0	0	0	0	0	0	0	0	0	0	0	0	0	0	0	0	0
Ca	none	none	Sm2O3	67.485	0.42	0.08	0.5	5	8.8	3_Literature	0	0	0	0	0	0	0	0	0	0	0	0	1	0	0	0	0	0	0	0	0	0	0	0	0	0	0	0	0	0	0	0	0	0	0	0	0	0	0
Ca	none	none	Sm2O3	69.985	0.42	0.08	0.5	5	11.3	3_Literature	0	0	0	0	0	0	0	0	0	0	0	0	1	0	0	0	0	0	0	0	0	0	0	0	0	0	0	0	0	0	0	0	0	0	0	0	0	0	0
Ca	none	none	Sm2O3	72.485	0.42	0.08	0.5	5	12.8	3_Literature	0	0	0	0	0	0	0	0	0	0	0	0	1	0	0	0	0	0	0	0	0	0	0	0	0	0	0	0	0	0	0	0	0	0	0	0	0	0	0
Ca	none	none	Sm2O3	74.985	0.42	0.08	0.5	5	14.1	3_Literature	0	0	0	0	0	0	0	0	0	0	0	0	1	0	0	0	0	0	0	0	0	0	0	0	0	0	0	0	0	0	0	0	0	0	0	0	0	0	0
Ca	none	none	Sm2O3	77.485	0.42	0.08	0.5	5	14.2	3_Literature	0	0	0	0	0	0	0	0	0	0	0	0	1	0	0	0	0	0	0	0	0	0	0	0	0	0	0	0	0	0	0	0	0	0	0	0	0	0	0
Ca	none	none	Sm2O3	79.985	0.42	0.08	0.5	5	13.2	3_Literature	0	0	0	0	0	0	0	0	0	0	0	0	1	0	0	0	0	0	0	0	0	0	0	0	0	0	0	0	0	0	0	0	0	0	0	0	0	0	0
Ca	none	none	Sm2O3	82.485	0.42	0.08	0.5	5	13.1	3_Literature	0	0	0	0	0	0	0	0	0	0	0	0	1	0	0	0	0	0	0	0	0	0	0	0	0	0	0	0	0	0	0	0	0	0	0	0	0	0	0
Ca	none	none	Sm2O3	84.985	0.42	0.08	0.5	5	11.7	3_Literature	0	0	0	0	0	0	0	0	0	0	0	0	1	0	0	0	0	0	0	0	0	0	0	0	0	0	0	0	0	0	0	0	0	0	0	0	0	0	0
Mg	none	none	Sm2O3	54.985	0.42	0.08	0.5	5	3.4	3_Literature	0	0	0	0	0	0	0	0	0	0	0	0	0	0	0	0	0	0	0	0	0	0	0	0	0	0	0	0	0	0	0	0	0	0	0	0	0	0	0
Mg	none	none	Sm2O3	57.485	0.42	0.08	0.5	5	4	3_Literature	0	0	0	0	0	0	0	0	0	0	0	0	0	0	0	0	0	0	0	0	0	0	0	0	0	0	0	0	0	0	0	0	0	0	0	0	0	0	0
Mg	none	none	Sm2O3	59.985	0.42	0.08	0.5	5	5.2	3_Literature	0	0	0	0	0	0	0	0	0	0	0	0	0	0	0	0	0	0	0	0	0	0	0	0	0	0	0	0	0	0	0	0	0	0	0	0	0	0	0
Mg	none	none	Sm2O3	62.485	0.42	0.08	0.5	5	6.2	3_Literature	0	0	0	0	0	0	0	0	0	0	0	0	0	0	0	0	0	0	0	0	0	0	0	0	0	0	0	0	0	0	0	0	0	0	0	0	0	0	0
Mg	none	none	Sm2O3	64.985	0.42	0.08	0.5	5	7.3	3_Literature	0	0	0	0	0	0	0	0	0	0	0	0	0	0	0	0	0	0	0	0	0	0	0	0	0	0	0	0	0	0	0	0	0	0	0	0	0	0	0
Mg	none	none	Sm2O3	67.485	0.42	0.08	0.5	5	8.8	3_Literature	0	0	0	0	0	0	0	0	0	0	0	0	0	0	0	0	0	0	0	0	0	0	0	0	0	0	0	0	0	0	0	0	0	0	0	0	0	0	0
Mg	none	none	Sm2O3	69.985	0.42	0.08	0.5	5	9.7	3_Literature	0	0	0	0	0	0	0	0	0	0	0	0	0	0	0	0	0	0	0	0	0	0	0	0	0	0	0	0	0	0	0	0	0	0	0	0	0	0	0
Mg	none	none	Sm2O3	72.485	0.42	0.08	0.5	5	10.1	3_Literature	0	0	0	0	0	0	0	0	0	0	0	0	0	0	0	0	0	0	0	0	0	0	0	0	0	0	0	0	0	0	0	0	0	0	0	0	0	0	0
Mg	none	none	Sm2O3	74.985	0.42	0.08	0.5	5	10.6	3_Literature	0	0	0	0	0	0	0	0	0	0	0	0	0	0	0	0	0	0	0	0	0	0	0	0	0	0	0	0	0	0	0	0	0	0	0	0	0	0	0
Mg	none	none	Sm2O3	77.485	0.42	0.08	0.5	5	11.4	3_Literature	0	0	0	0	0	0	0	0	0	0	0	0	0	0	0	0	0	0	0	0	0	0	0	0	0	0	0	0	0	0	0	0	0	0	0	0	0	0	0
Mg	none	none	Sm2O3	79.985	0.42	0.08	0.5	5	11.6	3_Literature	0	0	0	0	0	0	0	0	0	0	0	0	0	0	0	0	0	0	0	0	0	0	0	0	0	0	0	0	0	0	0	0	0	0	0	0	0	0	0
Mg	none	none	Sm2O3	82.485	0.42	0.08	0.5	5	11	3_Literature	0	0	0	0	0	0	0	0	0	0	0	0	0	0	0	0	0	0	0	0	0	0	0	0	0	0	0	0	0	0	0	0	0	0	0	0	0	0	0
Mg	none	none	Sm2O3	84.985	0.42	0.08	0.5	5	8.8	3_Literature	0	0	0	0	0	0	0	0	0	0	0	0	0	0	0	0	0	0	0	0	0	0	0	0	0	0	0	0	0	0	0	0	0	0	0	0	0	0	0
Zn	none	none	Sm2O3	54.985	0.42	0.08	0.5	5	1.5	3_Literature	0	0	0	0	0	0	0	0	0	0	0	0	0	0	0	0	0	0	0	0	0	0	0	0	0	0	0	0	0	0	0	0	0	0	0	0	0	0	0
Zn	none	none	Sm2O3	57.485	0.42	0.08	0.5	5	2.2	3_Literature	0	0	0	0	0	0	0	0	0	0	0	0	0	0	0	0	0	0	0	0	0	0	0	0	0	0	0	0	0	0	0	0	0	0	0	0	0	0	0
Zn	none	none	Sm2O3	59.985	0.42	0.08	0.5	5	2.9	3_Literature	0	0	0	0	0	0	0	0	0	0	0	0	0	0	0	0	0	0	0	0	0	0	0	0	0	0	0	0	0	0	0	0	0	0	0	0	0	0	0
Zn	none	none	Sm2O3	62.485	0.42	0.08	0.5	5	3.7	3_Literature	0	0	0	0	0	0	0	0	0	0	0	0	0	0	0	0	0	0	0	0	0	0	0	0	0	0	0	0	0	0	0	0	0	0	0	0	0	0	0
Zn	none	none	Sm2O3	64.985	0.42	0.08	0.5	5	4.7	3_Literature	0	0	0	0	0	0	0	0	0	0	0	0	0	0	0	0	0	0	0	0	0	0	0	0	0	0	0	0	0	0	0	0	0	0	0	0	0	0	0
Zn	none	none	Sm2O3	67.485	0.42	0.08	0.5	5	5.6	3_Literature	0	0	0	0	0	0	0	0	0	0	0	0	0	0	0	0	0	0	0	0	0	0	0	0	0	0	0	0	0	0	0	0	0	0	0	0	0	0	0
Zn	none	none	Sm2O3	69.985	0.42	0.08	0.5	5	7	3_Literature	0	0	0	0	0	0	0	0	0	0	0	0	0	0	0	0	0	0	0	0	0	0	0	0	0	0	0	0	0	0	0	0	0	0	0	0	0	0	0
Zn	none	none	Sm2O3	72.485	0.42	0.08	0.5	5	8.2	3_Literature	0	0	0	0	0	0	0	0	0	0	0	0	0	0	0	0	0	0	0	0	0	0	0	0	0	0	0	0	0	0	0	0	0	0	0	0	0	0	0
Zn	none	none	Sm2O3	74.985	0.42	0.08	0.5	5	9	3_Literature	0	0	0	0	0	0	0	0	0	0	0	0	0	0	0	0	0	0	0	0	0	0	0	0	0	0	0	0	0	0	0	0	0	0	0	0	0	0	0
Zn	none	none	Sm2O3	77.485	0.42	0.08	0.5	5	9.2	3_Literature	0	0	0	0	0	0	0	0	0	0	0	0	0	0	0	0	0	0	0	0	0	0	0	0	0	0	0	0	0	0	0	0	0	0	0	0	0	0	0
Zn	none	none	Sm2O3	79.985	0.42	0.08	0.5	5	8.5	3_Literature	0	0	0	0	0	0	0	0	0	0	0	0	0	0	0	0	0	0	0	0	0	0	0	0	0	0	0	0	0	0	0	0	0	0	0	0	0	0	0
Zn	none	none	Sm2O3	82.485	0.42	0.08	0.5	5	7	3_Literature	0	0	0	0	0	0	0	0	0	0	0	0	0	0	0	0	0	0	0	0	0	0	0	0	0	0	0	0	0	0	0	0	0	0	0	0	0	0	0
Zn	none	none	Sm2O3	84.985	0.42	0.08	0.5	5	4.9	3_Literature	0	0	0	0	0	0	0	0	0	0	0	0	0	0	0	0	0	0	0	0	0	0	0	0	0	0	0	0	0	0	0	0	0	0	0	0	0	0	0
Mn	Na	W	SiO2	84.885	0.68	0.32	0	2.1	7.5	3_Literature	0	0	0	0	0	0	0	0	0	0	0	0	0	0	0	0	0	0	0	0	0	0	0	0	0	0	0	0	0	0	0	0	0	0	0	0	0	0	0
Mn	Na	W	SiO2	88.385	0.68	0.32	0	2.1	12.1	3_Literature	0	0	0	0	0	0	0	0	0	0	0	0	0	0	0	0	0	0	0	0	0	0	0	0	0	0	0	0	0	0	0	0	0	0	0	0	0	0	0
Mn	Na	W	SiO2	91.385	0.68	0.32	0	2.1	14.2	3_Literature	0	0	0	0	0	0	0	0	0	0	0	0	0	0	0	0	0	0	0	0	0	0	0	0	0	0	0	0	0	0	0	0	0	0	0	0	0	0	0
Li	W	Mn	SiO2	74.185	0.68	0.32	0	2.1	0.8	3_Literature	0	0	0	0	0	0	0	0	0	0	0	0	0	0	0	0	0	0	0	0	0	0	0	0	0	0	0	0	0	0	0	0	0	0	0	0	0	1	0
Li	W	Mn	SiO2	78.185	0.7	0.3	0	2.3	4.2	3_Literature	0	0	0	0	0	0	0	0	0	0	0	0	0	0	0	0	0	0	0	0	0	0	0	0	0	0	0	0	0	0	0	0	0	0	0	0	0	1	0
Li	W	Mn	SiO2	80.085	0.67	0.33	0	2	9	3_Literature	0	0	0	0	0	0	0	0	0	0	0	0	0	0	0	0	0	0	0	0	0	0	0	0	0	0	0	0	0	0	0	0	0	0	0	0	0	1	0
Li	W	Mn	SiO2	85.385	0.68	0.32	0	2.1	23.9	3_Literature	0	0	0	0	0	0	0	0	0	0	0	0	0	0	0	0	0	0	0	0	0	0	0	0	0	0	0	0	0	0	0	0	0	0	0	0	0	1	0
Li	W	Mn	SiO2	88.485	0.69	0.31	0	2.2	23.5	3_Literature	0	0	0	0	0	0	0	0	0	0	0	0	0	0	0	0	0	0	0	0	0	0	0	0	0	0	0	0	0	0	0	0	0	0	0	0	0	1	0
Li	W	Mn	SiO2	89.685	0.68	0.32	0	2.1	20.7	3_Literature	0	0	0	0	0	0	0	0	0	0	0	0	0	0	0	0	0	0	0	0	0	0	0	0	0	0	0	0	0	0	0	0	0	0	0	0	0	1	0
Li	W	Mn	SiO2	93.185	0.7	0.3	0	2.3	19.8	3_Literature	0	0	0	0	0	0	0	0	0	0	0	0	0	0	0	0	0	0	0	0	0	0	0	0	0	0	0	0	0	0	0	0	0	0	0	0	0	1	0
Li	W	Mn	SiO2	82.985	0.76	0.24	0	3.2	12.8	3_Literature	0	0	0	0	0	0	0	0	0	0	0	0	0	0	0	0	0	0	0	0	0	0	0	0	0	0	0	0	0	0	0	0	0	0	0	0	0	1	0
Li	W	Mn	SiO2	89.685	0.76	0.24	0	3.2	20.7	3_Literature	0	0	0	0	0	0	0	0	0	0	0	0	0	0	0	0	0	0	0	0	0	0	0	0	0	0	0	0	0	0	0	0	0	0	0	0	0	1	0
Li	W	Mn	SiO2	92.585	0.76	0.24	0	3.2	19.8	3_Literature	0	0	0	0	0	0	0	0	0	0	0	0	0	0	0	0	0	0	0	0	0	0	0	0	0	0	0	0	0	0	0	0	0	0	0	0	0	1	0
Li	W	Mn	SiO2	94.385	0.76	0.24	0	3.2	18.8	3_Literature	0	0	0	0	0	0	0	0	0	0	0	0	0	0	0	0	0	0	0	0	0	0	0	0	0	0	0	0	0	0	0	0	0	0	0	0	0	1	0
Li	W	Mn	SiO2	88.185	0.8	0.2	0	4	20.7	3_Literature	0	0	0	0	0	0	0	0	0	0	0	0	0	0	0	0	0	0	0	0	0	0	0	0	0	0	0	0	0	0	0	0	0	0	0	0	0	1	0
Li	W	Mn	SiO2	91.485	0.8	0.2	0	4	17.6	3_Literature	0	0	0	0	0	0	0	0	0	0	0	0	0	0	0	0	0	0	0	0	0	0	0	0	0	0	0	0	0	0	0	0	0	0	0	0	0	1	0
Li	W	Mn	SiO2	92.985	0.8	0.2	0	4	17	3_Literature	0	0	0	0	0	0	0	0	0	0	0	0	0	0	0	0	0	0	0	0	0	0	0	0	0	0	0	0	0	0	0	0	0	0	0	0	0	1	0
Li	W	Mn	SiO2	93.785	0.8	0.2	0	4	16.7	3_Literature	0	0	0	0	0	0	0	0	0	0	0	0	0	0	0	0	0	0	0	0	0	0	0	0	0	0	0	0	0	0	0	0	0	0	0	0	0	1	0
Li	W	Mn	SiO2	90.285	0.68	0.32	0	2.1	19.5	3_Literature	0	0	0	0	0	0	0	0	0	0	0	0	0	0	0	0	0	0	0	0	0	0	0	0	0	0	0	0	0	0	0	0	0	0	0	0	0	1	0
Na	W	Mn	SiO2	81.885	0.68	0.32	0	2.1	17.8	3_Literature	0	0	0	0	0	0	0	0	0	0	0	0	0	0	0	0	0	0	0	0	0	0	0	0	0	0	0	0	0	0	0	0	0	0	0	0	0	0	0
Na	W	Mn	SiO2	85.085	0.69	0.31	0	2.2	18	3_Literature	0	0	0	0	0	0	0	0	0	0	0	0	0	0	0	0	0	0	0	0	0	0	0	0	0	0	0	0	0	0	0	0	0	0	0	0	0	0	0
Na	W	Mn	SiO2	90.185	0.67	0.33	0	2	23.9	3_Literature	0	0	0	0	0	0	0	0	0	0	0	0	0	0	0	0	0	0	0	0	0	0	0	0	0	0	0	0	0	0	0	0	0	0	0	0	0	0	0
Na	W	Mn	SiO2	84.985	0.73	0.27	0	2.7	17	3_Literature	0	0	0	0	0	0	0	0	0	0	0	0	0	0	0	0	0	0	0	0	0	0	0	0	0	0	0	0	0	0	0	0	0	0	0	0	0	0	0
Na	W	Mn	SiO2	87.785	0.73	0.27	0	2.7	19.5	3_Literature	0	0	0	0	0	0	0	0	0	0	0	0	0	0	0	0	0	0	0	0	0	0	0	0	0	0	0	0	0	0	0	0	0	0	0	0	0	0	0
Na	W	Mn	SiO2	89.885	0.75	0.25	0	3	22.9	3_Literature	0	0	0	0	0	0	0	0	0	0	0	0	0	0	0	0	0	0	0	0	0	0	0	0	0	0	0	0	0	0	0	0	0	0	0	0	0	0	0
Na	W	Mn	SiO2	90.885	0.75	0.25	0	3	23.8	3_Literature	0	0	0	0	0	0	0	0	0	0	0	0	0	0	0	0	0	0	0	0	0	0	0	0	0	0	0	0	0	0	0	0	0	0	0	0	0	0	0
Na	W	Mn	SiO2	90.785	0.73	0.27	0	2.7	24.7	3_Literature	0	0	0	0	0	0	0	0	0	0	0	0	0	0	0	0	0	0	0	0	0	0	0	0	0	0	0	0	0	0	0	0	0	0	0	0	0	0	0
K	W	Mn	SiO2	81.685	0.67	0.33	0	2	5.8	3_Literature	0	0	0	0	0	0	0	0	0	0	0	0	0	0	0	0	0	0	0	0	0	0	0	0	0	0	0	0	0	0	0	0	0	1	0	0	0	0	0
K	W	Mn	SiO2	84.885	0.68	0.32	0	2.1	20.7	3_Literature	0	0	0	0	0	0	0	0	0	0	0	0	0	0	0	0	0	0	0	0	0	0	0	0	0	0	0	0	0	0	0	0	0	1	0	0	0	0	0
K	W	Mn	SiO2	88.385	0.68	0.32	0	2.1	20	3_Literature	0	0	0	0	0	0	0	0	0	0	0	0	0	0	0	0	0	0	0	0	0	0	0	0	0	0	0	0	0	0	0	0	0	1	0	0	0	0	0
K	W	Mn	SiO2	86.885	0.69	0.31	0	2.2	14.7	3_Literature	0	0	0	0	0	0	0	0	0	0	0	0	0	0	0	0	0	0	0	0	0	0	0	0	0	0	0	0	0	0	0	0	0	1	0	0	0	0	0
K	W	Mn	SiO2	87.385	0.69	0.31	0	2.2	20.8	3_Literature	0	0	0	0	0	0	0	0	0	0	0	0	0	0	0	0	0	0	0	0	0	0	0	0	0	0	0	0	0	0	0	0	0	1	0	0	0	0	0
K	W	Mn	SiO2	88.085	0.69	0.31	0	2.2	19.3	3_Literature	0	0	0	0	0	0	0	0	0	0	0	0	0	0	0	0	0	0	0	0	0	0	0	0	0	0	0	0	0	0	0	0	0	1	0	0	0	0	0
K	W	Mn	SiO2	78.385	0.71	0.29	0	2.4	4.3	3_Literature	0	0	0	0	0	0	0	0	0	0	0	0	0	0	0	0	0	0	0	0	0	0	0	0	0	0	0	0	0	0	0	0	0	1	0	0	0	0	0
K	W	Mn	SiO2	80.385	0.71	0.29	0	2.5	12.5	3_Literature	0	0	0	0	0	0	0	0	0	0	0	0	0	0	0	0	0	0	0	0	0	0	0	0	0	0	0	0	0	0	0	0	0	1	0	0	0	0	0
K	W	Mn	SiO2	88.185	0.71	0.29	0	2.4	27.1	3_Literature	0	0	0	0	0	0	0	0	0	0	0	0	0	0	0	0	0	0	0	0	0	0	0	0	0	0	0	0	0	0	0	0	0	1	0	0	0	0	0
K	W	Mn	SiO2	89.485	0.71	0.29	0	2.4	24.2	3_Literature	0	0	0	0	0	0	0	0	0	0	0	0	0	0	0	0	0	0	0	0	0	0	0	0	0	0	0	0	0	0	0	0	0	1	0	0	0	0	0
K	W	Mn	SiO2	89.685	0.71	0.29	0	2.5	23.4	3_Literature	0	0	0	0	0	0	0	0	0	0	0	0	0	0	0	0	0	0	0	0	0	0	0	0	0	0	0	0	0	0	0	0	0	1	0	0	0	0	0
K	W	Mn	SiO2	81.585	0.82	0.18	0	4.6	7	3_Literature	0	0	0	0	0	0	0	0	0	0	0	0	0	0	0	0	0	0	0	0	0	0	0	0	0	0	0	0	0	0	0	0	0	1	0	0	0	0	0
K	W	Mn	SiO2	84.585	0.82	0.18	0	4.6	17.6	3_Literature	0	0	0	0	0	0	0	0	0	0	0	0	0	0	0	0	0	0	0	0	0	0	0	0	0	0	0	0	0	0	0	0	0	1	0	0	0	0	0
K	W	Mn	SiO2	87.585	0.82	0.18	0	4.6	21.8	3_Literature	0	0	0	0	0	0	0	0	0	0	0	0	0	0	0	0	0	0	0	0	0	0	0	0	0	0	0	0	0	0	0	0	0	1	0	0	0	0	0
K	W	Mn	SiO2	87.985	0.71	0.29	0	2.4	12.7	3_Literature	0	0	0	0	0	0	0	0	0	0	0	0	0	0	0	0	0	0	0	0	0	0	0	0	0	0	0	0	0	0	0	0	0	1	0	0	0	0	0
Rb	W	Mn	SiO2	80.685	0.69	0.31	0	2.2	10.7	3_Literature	0	0	0	0	0	0	0	0	0	0	0	0	0	0	0	0	0	0	0	0	0	0	0	0	0	0	0	0	0	0	0	0	0	0	0	0	0	0	0
Rb	W	Mn	SiO2	85.485	0.69	0.31	0	2.2	18.9	3_Literature	0	0	0	0	0	0	0	0	0	0	0	0	0	0	0	0	0	0	0	0	0	0	0	0	0	0	0	0	0	0	0	0	0	0	0	0	0	0	0
Rb	W	Mn	SiO2	86.485	0.69	0.31	0	2.2	19.2	3_Literature	0	0	0	0	0	0	0	0	0	0	0	0	0	0	0	0	0	0	0	0	0	0	0	0	0	0	0	0	0	0	0	0	0	0	0	0	0	0	0
Rb	W	Mn	SiO2	87.185	0.69	0.31	0	2.2	17.8	3_Literature	0	0	0	0	0	0	0	0	0	0	0	0	0	0	0	0	0	0	0	0	0	0	0	0	0	0	0	0	0	0	0	0	0	0	0	0	0	0	0
Rb	W	Mn	SiO2	83.685	0.71	0.29	0	2.4	14.3	3_Literature	0	0	0	0	0	0	0	0	0	0	0	0	0	0	0	0	0	0	0	0	0	0	0	0	0	0	0	0	0	0	0	0	0	0	0	0	0	0	0
Rb	W	Mn	SiO2	84.385	0.71	0.29	0	2.5	25.6	3_Literature	0	0	0	0	0	0	0	0	0	0	0	0	0	0	0	0	0	0	0	0	0	0	0	0	0	0	0	0	0	0	0	0	0	0	0	0	0	0	0
Rb	W	Mn	SiO2	90.785	0.71	0.29	0	2.5	21.1	3_Literature	0	0	0	0	0	0	0	0	0	0	0	0	0	0	0	0	0	0	0	0	0	0	0	0	0	0	0	0	0	0	0	0	0	0	0	0	0	0	0
Rb	W	Mn	SiO2	83.985	0.71	0.29	0	2.4	14.3	3_Literature	0	0	0	0	0	0	0	0	0	0	0	0	0	0	0	0	0	0	0	0	0	0	0	0	0	0	0	0	0	0	0	0	0	0	0	0	0	0	0
Rb	W	Mn	SiO2	80.685	0.73	0.27	0	2.7	6.6	3_Literature	0	0	0	0	0	0	0	0	0	0	0	0	0	0	0	0	0	0	0	0	0	0	0	0	0	0	0	0	0	0	0	0	0	0	0	0	0	0	0
Rb	W	Mn	SiO2	86.485	0.73	0.27	0	2.7	21.7	3_Literature	0	0	0	0	0	0	0	0	0	0	0	0	0	0	0	0	0	0	0	0	0	0	0	0	0	0	0	0	0	0	0	0	0	0	0	0	0	0	0
Rb	W	Mn	SiO2	87.285	0.73	0.27	0	2.7	20.8	3_Literature	0	0	0	0	0	0	0	0	0	0	0	0	0	0	0	0	0	0	0	0	0	0	0	0	0	0	0	0	0	0	0	0	0	0	0	0	0	0	0
Rb	W	Mn	SiO2	89.485	0.73	0.27	0	2.7	16.9	3_Literature	0	0	0	0	0	0	0	0	0	0	0	0	0	0	0	0	0	0	0	0	0	0	0	0	0	0	0	0	0	0	0	0	0	0	0	0	0	0	0
Th	Ca	none	Al2O3	42.685	0.84	0.17	0	5.1	0.1	3_Literature	0	0	1	0	0	0	0	0	0	0	0	0	1	0	0	0	0	0	0	0	0	0	0	0	0	0	0	0	0	0	0	0	0	0	0	0	0	0	0
Th	Ca	none	Al2O3	47.285	0.84	0.17	0	5.1	4.9	3_Literature	0	0	1	0	0	0	0	0	0	0	0	0	1	0	0	0	0	0	0	0	0	0	0	0	0	0	0	0	0	0	0	0	0	0	0	0	0	0	0
Th	Ca	none	Al2O3	51.685	0.84	0.17	0	5.1	6.8	3_Literature	0	0	1	0	0	0	0	0	0	0	0	0	1	0	0	0	0	0	0	0	0	0	0	0	0	0	0	0	0	0	0	0	0	0	0	0	0	0	0
Th	Ca	none	Al2O3	56.185	0.84	0.17	0	5.1	9.5	3_Literature	0	0	1	0	0	0	0	0	0	0	0	0	1	0	0	0	0	0	0	0	0	0	0	0	0	0	0	0	0	0	0	0	0	0	0	0	0	0	0
Th	Ca	none	Al2O3	60.685	0.84	0.17	0	5.1	11.5	3_Literature	0	0	1	0	0	0	0	0	0	0	0	0	1	0	0	0	0	0	0	0	0	0	0	0	0	0	0	0	0	0	0	0	0	0	0	0	0	0	0
Th	Ca	none	Al2O3	65.085	0.84	0.17	0	5.1	13.1	3_Literature	0	0	1	0	0	0	0	0	0	0	0	0	1	0	0	0	0	0	0	0	0	0	0	0	0	0	0	0	0	0	0	0	0	0	0	0	0	0	0
Th	Ca	none	Al2O3	69.285	0.84	0.17	0	5.1	13	3_Literature	0	0	1	0	0	0	0	0	0	0	0	0	1	0	0	0	0	0	0	0	0	0	0	0	0	0	0	0	0	0	0	0	0	0	0	0	0	0	0
Th	Ca	none	Al2O3	73.585	0.84	0.17	0	5.1	12.1	3_Literature	0	0	1	0	0	0	0	0	0	0	0	0	1	0	0	0	0	0	0	0	0	0	0	0	0	0	0	0	0	0	0	0	0	0	0	0	0	0	0
Na	Th	Ca	Al2O3	47.185	0.84	0.17	0	5.1	0	3_Literature	0	0	1	0	0	0	0	0	0	0	0	0	1	0	0	0	0	0	0	0	0	0	0	0	0	0	0	0	0	0	0	0	0	0	0	0	0	0	0
Na	Th	Ca	Al2O3	51.685	0.84	0.17	0	5.1	0	3_Literature	0	0	1	0	0	0	0	0	0	0	0	0	1	0	0	0	0	0	0	0	0	0	0	0	0	0	0	0	0	0	0	0	0	0	0	0	0	0	0
Na	Th	Ca	Al2O3	56.085	0.84	0.17	0	5.1	0.1	3_Literature	0	0	1	0	0	0	0	0	0	0	0	0	1	0	0	0	0	0	0	0	0	0	0	0	0	0	0	0	0	0	0	0	0	0	0	0	0	0	0
Na	Th	Ca	Al2O3	60.585	0.84	0.17	0	5.1	8.4	3_Literature	0	0	1	0	0	0	0	0	0	0	0	0	1	0	0	0	0	0	0	0	0	0	0	0	0	0	0	0	0	0	0	0	0	0	0	0	0	0	0
Na	Th	Ca	Al2O3	65.085	0.84	0.17	0	5.1	10.7	3_Literature	0	0	1	0	0	0	0	0	0	0	0	0	1	0	0	0	0	0	0	0	0	0	0	0	0	0	0	0	0	0	0	0	0	0	0	0	0	0	0
Na	Th	Ca	Al2O3	69.185	0.84	0.17	0	5.1	11.6	3_Literature	0	0	1	0	0	0	0	0	0	0	0	0	1	0	0	0	0	0	0	0	0	0	0	0	0	0	0	0	0	0	0	0	0	0	0	0	0	0	0
K	Th	Ca	Al2O3	46.985	0.84	0.17	0	5.1	0	3_Literature	0	0	1	0	0	0	0	0	0	0	0	0	1	0	0	0	0	0	0	0	0	0	0	0	0	0	0	0	0	0	0	0	0	1	0	0	0	0	0
K	Th	Ca	Al2O3	51.685	0.84	0.17	0	5.1	0	3_Literature	0	0	1	0	0	0	0	0	0	0	0	0	1	0	0	0	0	0	0	0	0	0	0	0	0	0	0	0	0	0	0	0	0	1	0	0	0	0	0
K	Th	Ca	Al2O3	56.185	0.84	0.17	0	5.1	0.1	3_Literature	0	0	1	0	0	0	0	0	0	0	0	0	1	0	0	0	0	0	0	0	0	0	0	0	0	0	0	0	0	0	0	0	0	1	0	0	0	0	0
K	Th	Ca	Al2O3	60.485	0.84	0.17	0	5.1	12.3	3_Literature	0	0	1	0	0	0	0	0	0	0	0	0	1	0	0	0	0	0	0	0	0	0	0	0	0	0	0	0	0	0	0	0	0	1	0	0	0	0	0
K	Th	Ca	Al2O3	64.885	0.84	0.17	0	5.1	13.1	3_Literature	0	0	1	0	0	0	0	0	0	0	0	0	1	0	0	0	0	0	0	0	0	0	0	0	0	0	0	0	0	0	0	0	0	1	0	0	0	0	0
K	Th	Ca	Al2O3	69.185	0.84	0.17	0	5.1	13.2	3_Literature	0	0	1	0	0	0	0	0	0	0	0	0	1	0	0	0	0	0	0	0	0	0	0	0	0	0	0	0	0	0	0	0	0	1	0	0	0	0	0
K	Th	Ca	Al2O3	73.485	0.84	0.17	0	5.1	12	3_Literature	0	0	1	0	0	0	0	0	0	0	0	0	1	0	0	0	0	0	0	0	0	0	0	0	0	0	0	0	0	0	0	0	0	1	0	0	0	0	0
Sr	La	none	Al2O3	42.585	0.84	0.17	0	5.1	0	3_Literature	0	0	1	0	0	0	0	0	0	0	0	0	0	0	0	0	0	0	0	0	0	0	0	0	0	0	0	0	0	0	0	0	0	0	0	1	0	0	0
Sr	La	none	Al2O3	47.185	0.84	0.17	0	5.1	0	3_Literature	0	0	1	0	0	0	0	0	0	0	0	0	0	0	0	0	0	0	0	0	0	0	0	0	0	0	0	0	0	0	0	0	0	0	0	1	0	0	0
Sr	La	none	Al2O3	51.485	0.84	0.17	0	5.1	0	3_Literature	0	0	1	0	0	0	0	0	0	0	0	0	0	0	0	0	0	0	0	0	0	0	0	0	0	0	0	0	0	0	0	0	0	0	0	1	0	0	0
Sr	La	none	Al2O3	55.985	0.84	0.17	0	5.1	2	3_Literature	0	0	1	0	0	0	0	0	0	0	0	0	0	0	0	0	0	0	0	0	0	0	0	0	0	0	0	0	0	0	0	0	0	0	0	1	0	0	0
Sr	La	none	Al2O3	60.485	0.84	0.17	0	5.1	12	3_Literature	0	0	1	0	0	0	0	0	0	0	0	0	0	0	0	0	0	0	0	0	0	0	0	0	0	0	0	0	0	0	0	0	0	0	0	1	0	0	0
Sr	La	none	Al2O3	64.785	0.84	0.17	0	5.1	15.1	3_Literature	0	0	1	0	0	0	0	0	0	0	0	0	0	0	0	0	0	0	0	0	0	0	0	0	0	0	0	0	0	0	0	0	0	0	0	1	0	0	0
Sr	La	none	Al2O3	73.585	0.84	0.17	0	5.1	16.3	3_Literature	0	0	1	0	0	0	0	0	0	0	0	0	0	0	0	0	0	0	0	0	0	0	0	0	0	0	0	0	0	0	0	0	0	0	0	1	0	0	0
Sr	none	none	Al2O3	80.985	0.83	0.17	0	4.9	15.8	3_Literature	0	0	1	0	0	0	0	0	0	0	0	0	0	0	0	0	0	0	0	0	0	0	0	0	0	0	0	0	0	0	0	0	0	0	0	0	0	0	0
none	none	none	Al2O3	80.985	0.83	0.17	0	4.9	2.2	3_Literature	0	0	1	0	0	0	0	0	0	0	0	0	0	0	0	0	0	0	0	0	0	0	0	0	0	0	0	0	0	0	0	0	0	0	0	0	0	0	0
Sr	none	none	Al2O3	80.985	0.83	0.17	0	4.9	7.4	3_Literature	0	0	1	0	0	0	0	0	0	0	0	0	0	0	0	0	0	0	0	0	0	0	0	0	0	0	0	0	0	0	0	0	0	0	0	0	0	0	0
Sr	none	none	Al2O3	80.985	0.83	0.17	0	4.9	9.7	3_Literature	0	0	1	0	0	0	0	0	0	0	0	0	0	0	0	0	0	0	0	0	0	0	0	0	0	0	0	0	0	0	0	0	0	0	0	0	0	0	0
Sr	none	none	Al2O3	80.985	0.83	0.17	0	4.9	13.1	3_Literature	0	0	1	0	0	0	0	0	0	0	0	0	0	0	0	0	0	0	0	0	0	0	0	0	0	0	0	0	0	0	0	0	0	0	0	0	0	0	0
Na	W	Mn	SiO2	80.985	0.83	0.17	0	4.9	12.2	3_Literature	0	0	0	0	0	0	0	0	0	0	0	0	0	0	0	0	0	0	0	0	0	0	0	0	0	0	0	0	0	0	0	0	0	0	0	0	0	0	0
none	Al	none	SrO	80.985	0.83	0.17	0	4.9	3.8	3_Literature	0	1	0	0	0	0	0	0	0	0	0	0	0	0	0	0	0	0	0	0	0	0	0	0	0	0	0	0	0	0	0	0	0	0	0	0	0	0	0
Sr	none	none	Al2O3	80.985	0.83	0.17	0	4.9	4.9	3_Literature	0	0	1	0	0	0	0	0	0	0	0	0	0	0	0	0	0	0	0	0	0	0	0	0	0	0	0	0	0	0	0	0	0	0	0	0	0	0	0
none	Al	none	SrO	80.985	0.83	0.17	0	4.9	15.9	3_Literature	0	1	0	0	0	0	0	0	0	0	0	0	0	0	0	0	0	0	0	0	0	0	0	0	0	0	0	0	0	0	0	0	0	0	0	0	0	0	0
none	Al	none	SrO	80.985	0.83	0.17	0	4.9	14.6	3_Literature	0	1	0	0	0	0	0	0	0	0	0	0	0	0	0	0	0	0	0	0	0	0	0	0	0	0	0	0	0	0	0	0	0	0	0	0	0	0	0
Na	W	Mn	SiO2	79.985	0.67	0.33	0	2	20.7	3_Literature	0	0	0	0	0	0	0	0	0	0	0	0	0	0	0	0	0	0	0	0	0	0	0	0	0	0	0	0	0	0	0	0	0	0	0	0	0	0	0
Na	W	Mn	SiO2	79.985	0.67	0.33	0	2	23.3	3_Literature	0	0	0	0	0	0	0	0	0	0	0	0	0	0	0	0	0	0	0	0	0	0	0	0	0	0	0	0	0	0	0	0	0	0	0	0	0	0	0
Na	W	Mn	SiO2	73.985	0.67	0.33	0	2	13.9	3_Literature	0	0	0	0	0	0	0	0	0	0	0	0	0	0	0	0	0	0	0	0	0	0	0	0	0	0	0	0	0	0	0	0	0	0	0	0	0	0	0
Na	W	Mn	SiO2	75.985	0.67	0.33	0	2	18.3	3_Literature	0	0	0	0	0	0	0	0	0	0	0	0	0	0	0	0	0	0	0	0	0	0	0	0	0	0	0	0	0	0	0	0	0	0	0	0	0	0	0
Na	W	Mn	SiO2	77.985	0.67	0.33	0	2	19.8	3_Literature	0	0	0	0	0	0	0	0	0	0	0	0	0	0	0	0	0	0	0	0	0	0	0	0	0	0	0	0	0	0	0	0	0	0	0	0	0	0	0
Na	W	Mn	SiO2	79.985	0.67	0.33	0	2	19.7	3_Literature	0	0	0	0	0	0	0	0	0	0	0	0	0	0	0	0	0	0	0	0	0	0	0	0	0	0	0	0	0	0	0	0	0	0	0	0	0	0	0
Na	W	Mn	SiO2	81.985	0.67	0.33	0	2	20	3_Literature	0	0	0	0	0	0	0	0	0	0	0	0	0	0	0	0	0	0	0	0	0	0	0	0	0	0	0	0	0	0	0	0	0	0	0	0	0	0	0
Na	W	Mn	SiO2	79.985	0.5	0.5	0	1	22	3_Literature	0	0	0	0	0	0	0	0	0	0	0	0	0	0	0	0	0	0	0	0	0	0	0	0	0	0	0	0	0	0	0	0	0	0	0	0	0	0	0
Na	W	Mn	SiO2	79.985	0.67	0.33	0	2	20.8	3_Literature	0	0	0	0	0	0	0	0	0	0	0	0	0	0	0	0	0	0	0	0	0	0	0	0	0	0	0	0	0	0	0	0	0	0	0	0	0	0	0
Na	W	Mn	SiO2	79.985	0.75	0.25	0	3	17.9	3_Literature	0	0	0	0	0	0	0	0	0	0	0	0	0	0	0	0	0	0	0	0	0	0	0	0	0	0	0	0	0	0	0	0	0	0	0	0	0	0	0
Na	W	Mn	SiO2	79.985	0.8	0.2	0	4	13.2	3_Literature	0	0	0	0	0	0	0	0	0	0	0	0	0	0	0	0	0	0	0	0	0	0	0	0	0	0	0	0	0	0	0	0	0	0	0	0	0	0	0
Na	W	Mn	SiO2	79.985	0.83	0.17	0	5	11.5	3_Literature	0	0	0	0	0	0	0	0	0	0	0	0	0	0	0	0	0	0	0	0	0	0	0	0	0	0	0	0	0	0	0	0	0	0	0	0	0	0	0
Na	W	Mn	SiO2	79.985	0.67	0.33	0	2	20	3_Literature	0	0	0	0	0	0	0	0	0	0	0	0	0	0	0	0	0	0	0	0	0	0	0	0	0	0	0	0	0	0	0	0	0	0	0	0	0	0	0
Na	W	Mn	SiO2	79.985	0.67	0.33	0	2	18.7	3_Literature	0	0	0	0	0	0	0	0	0	0	0	0	0	0	0	0	0	0	0	0	0	0	0	0	0	0	0	0	0	0	0	0	0	0	0	0	0	0	0
Na	W	Mn	SiO2	79.985	0.67	0.33	0	2	19.6	3_Literature	0	0	0	0	0	0	0	0	0	0	0	0	0	0	0	0	0	0	0	0	0	0	0	0	0	0	0	0	0	0	0	0	0	0	0	0	0	0	0
Na	W	Mn	SiO2	79.985	0.67	0.33	0	2	18.6	3_Literature	0	0	0	0	0	0	0	0	0	0	0	0	0	0	0	0	0	0	0	0	0	0	0	0	0	0	0	0	0	0	0	0	0	0	0	0	0	0	0
Na	W	Mn	SiO2	79.985	0.67	0.33	0	2	17.1	3_Literature	0	0	0	0	0	0	0	0	0	0	0	0	0	0	0	0	0	0	0	0	0	0	0	0	0	0	0	0	0	0	0	0	0	0	0	0	0	0	0
Na	W	Mn	SiO2	79.985	0.67	0.33	0	2	16.6	3_Literature	0	0	0	0	0	0	0	0	0	0	0	0	0	0	0	0	0	0	0	0	0	0	0	0	0	0	0	0	0	0	0	0	0	0	0	0	0	0	0
Na	W	Mn	SiO2	79.985	0.67	0.33	0	2	15.5	3_Literature	0	0	0	0	0	0	0	0	0	0	0	0	0	0	0	0	0	0	0	0	0	0	0	0	0	0	0	0	0	0	0	0	0	0	0	0	0	0	0
Sm	none	none	Al2O3	73.985	0.9	0.1	0	9	1.7	3_Literature	0	0	1	0	0	0	0	0	0	0	0	0	0	0	0	0	0	0	0	0	0	0	0	0	0	0	0	0	0	0	0	0	0	0	0	0	0	0	0
Sm	none	none	Al2O3	73.985	0.88	0.13	0	7	2	3_Literature	0	0	1	0	0	0	0	0	0	0	0	0	0	0	0	0	0	0	0	0	0	0	0	0	0	0	0	0	0	0	0	0	0	0	0	0	0	0	0
Sm	none	none	Al2O3	73.985	0.8	0.2	0	4	5	3_Literature	0	0	1	0	0	0	0	0	0	0	0	0	0	0	0	0	0	0	0	0	0	0	0	0	0	0	0	0	0	0	0	0	0	0	0	0	0	0	0
Sm	none	none	Al2O3	73.985	0.8	0.2	0	4	3.2	3_Literature	0	0	1	0	0	0	0	0	0	0	0	0	0	0	0	0	0	0	0	0	0	0	0	0	0	0	0	0	0	0	0	0	0	0	0	0	0	0	0
Sm	none	none	Al2O3	73.985	0.8	0.2	0	4	6.2	3_Literature	0	0	1	0	0	0	0	0	0	0	0	0	0	0	0	0	0	0	0	0	0	0	0	0	0	0	0	0	0	0	0	0	0	0	0	0	0	0	0
Sm	none	none	Al2O3	73.985	0.8	0.2	0	4	4.6	3_Literature	0	0	1	0	0	0	0	0	0	0	0	0	0	0	0	0	0	0	0	0	0	0	0	0	0	0	0	0	0	0	0	0	0	0	0	0	0	0	0
Sm	none	none	Al2O3	79.985	0.9	0.1	0	9	2.6	3_Literature	0	0	1	0	0	0	0	0	0	0	0	0	0	0	0	0	0	0	0	0	0	0	0	0	0	0	0	0	0	0	0	0	0	0	0	0	0	0	0
Sm	none	none	Al2O3	79.985	0.88	0.13	0	7	3.4	3_Literature	0	0	1	0	0	0	0	0	0	0	0	0	0	0	0	0	0	0	0	0	0	0	0	0	0	0	0	0	0	0	0	0	0	0	0	0	0	0	0
Sm	none	none	Al2O3	79.985	0.8	0.2	0	4	5.9	3_Literature	0	0	1	0	0	0	0	0	0	0	0	0	0	0	0	0	0	0	0	0	0	0	0	0	0	0	0	0	0	0	0	0	0	0	0	0	0	0	0
Sm	none	none	Al2O3	79.985	0.8	0.2	0	4	5	3_Literature	0	0	1	0	0	0	0	0	0	0	0	0	0	0	0	0	0	0	0	0	0	0	0	0	0	0	0	0	0	0	0	0	0	0	0	0	0	0	0
Sm	none	none	Al2O3	79.985	0.8	0.2	0	4	7	3_Literature	0	0	1	0	0	0	0	0	0	0	0	0	0	0	0	0	0	0	0	0	0	0	0	0	0	0	0	0	0	0	0	0	0	0	0	0	0	0	0
Sm	none	none	Al2O3	79.985	0.8	0.2	0	4	5.9	3_Literature	0	0	1	0	0	0	0	0	0	0	0	0	0	0	0	0	0	0	0	0	0	0	0	0	0	0	0	0	0	0	0	0	0	0	0	0	0	0	0
none	none	none	Sm2O3	73.985	0.9	0.1	0	9	5.3	3_Literature	0	0	0	0	0	0	0	0	0	0	0	0	0	0	0	0	0	0	0	0	0	0	0	0	0	0	0	0	0	0	0	0	0	0	0	0	0	0	0
none	none	none	Sm2O3	73.985	0.88	0.13	0	7	6.8	3_Literature	0	0	0	0	0	0	0	0	0	0	0	0	0	0	0	0	0	0	0	0	0	0	0	0	0	0	0	0	0	0	0	0	0	0	0	0	0	0	0
none	none	none	Sm2O3	73.985	0.8	0.2	0	4	5.3	3_Literature	0	0	0	0	0	0	0	0	0	0	0	0	0	0	0	0	0	0	0	0	0	0	0	0	0	0	0	0	0	0	0	0	0	0	0	0	0	0	0
Sm	none	none	Al2O3	73.985	0.9	0.1	0	9	1.3	3_Literature	0	0	1	0	0	0	0	0	0	0	0	0	0	0	0	0	0	0	0	0	0	0	0	0	0	0	0	0	0	0	0	0	0	0	0	0	0	0	0
Sm	none	none	Al2O3	73.985	0.88	0.13	0	7	1.7	3_Literature	0	0	1	0	0	0	0	0	0	0	0	0	0	0	0	0	0	0	0	0	0	0	0	0	0	0	0	0	0	0	0	0	0	0	0	0	0	0	0
Sm	none	none	Al2O3	73.985	0.8	0.2	0	4	3.5	3_Literature	0	0	1	0	0	0	0	0	0	0	0	0	0	0	0	0	0	0	0	0	0	0	0	0	0	0	0	0	0	0	0	0	0	0	0	0	0	0	0
Sm	none	none	Al2O3	73.985	0.8	0.2	0	4	5.7	3_Literature	0	0	1	0	0	0	0	0	0	0	0	0	0	0	0	0	0	0	0	0	0	0	0	0	0	0	0	0	0	0	0	0	0	0	0	0	0	0	0
none	none	none	Sm2O3	79.985	0.9	0.1	0	9	3.2	3_Literature	0	0	0	0	0	0	0	0	0	0	0	0	0	0	0	0	0	0	0	0	0	0	0	0	0	0	0	0	0	0	0	0	0	0	0	0	0	0	0
none	none	none	Sm2O3	79.985	0.88	0.13	0	7	6.2	3_Literature	0	0	0	0	0	0	0	0	0	0	0	0	0	0	0	0	0	0	0	0	0	0	0	0	0	0	0	0	0	0	0	0	0	0	0	0	0	0	0
none	none	none	Sm2O3	79.985	0.8	0.2	0	4	5	3_Literature	0	0	0	0	0	0	0	0	0	0	0	0	0	0	0	0	0	0	0	0	0	0	0	0	0	0	0	0	0	0	0	0	0	0	0	0	0	0	0
Sm	none	none	Al2O3	79.985	0.9	0.1	0	9	2.6	3_Literature	0	0	1	0	0	0	0	0	0	0	0	0	0	0	0	0	0	0	0	0	0	0	0	0	0	0	0	0	0	0	0	0	0	0	0	0	0	0	0
Sm	none	none	Al2O3	79.985	0.88	0.13	0	7	3	3_Literature	0	0	1	0	0	0	0	0	0	0	0	0	0	0	0	0	0	0	0	0	0	0	0	0	0	0	0	0	0	0	0	0	0	0	0	0	0	0	0
Sm	none	none	Al2O3	79.985	0.8	0.2	0	4	5.2	3_Literature	0	0	1	0	0	0	0	0	0	0	0	0	0	0	0	0	0	0	0	0	0	0	0	0	0	0	0	0	0	0	0	0	0	0	0	0	0	0	0
Sm	none	none	Al2O3	79.985	0.8	0.2	0	4	5.9	3_Literature	0	0	1	0	0	0	0	0	0	0	0	0	0	0	0	0	0	0	0	0	0	0	0	0	0	0	0	0	0	0	0	0	0	0	0	0	0	0	0
none	none	none	Sm2O3	73.985	0.9	0.1	0	9	3.3	3_Literature	0	0	0	0	0	0	0	0	0	0	0	0	0	0	0	0	0	0	0	0	0	0	0	0	0	0	0	0	0	0	0	0	0	0	0	0	0	0	0
none	none	none	Sm2O3	73.985	0.88	0.13	0	7	4.6	3_Literature	0	0	0	0	0	0	0	0	0	0	0	0	0	0	0	0	0	0	0	0	0	0	0	0	0	0	0	0	0	0	0	0	0	0	0	0	0	0	0
none	none	none	Sm2O3	73.985	0.8	0.2	0	4	8	3_Literature	0	0	0	0	0	0	0	0	0	0	0	0	0	0	0	0	0	0	0	0	0	0	0	0	0	0	0	0	0	0	0	0	0	0	0	0	0	0	0
none	none	none	Sm2O3	73.985	0.9	0.1	0	9	5.9	3_Literature	0	0	0	0	0	0	0	0	0	0	0	0	0	0	0	0	0	0	0	0	0	0	0	0	0	0	0	0	0	0	0	0	0	0	0	0	0	0	0
none	none	none	Sm2O3	73.985	0.88	0.13	0	7	6.9	3_Literature	0	0	0	0	0	0	0	0	0	0	0	0	0	0	0	0	0	0	0	0	0	0	0	0	0	0	0	0	0	0	0	0	0	0	0	0	0	0	0
none	none	none	Sm2O3	73.985	0.8	0.2	0	4	8.5	3_Literature	0	0	0	0	0	0	0	0	0	0	0	0	0	0	0	0	0	0	0	0	0	0	0	0	0	0	0	0	0	0	0	0	0	0	0	0	0	0	0
Sm	none	none	Al2O3	73.985	0.9	0.1	0	9	0.4	3_Literature	0	0	1	0	0	0	0	0	0	0	0	0	0	0	0	0	0	0	0	0	0	0	0	0	0	0	0	0	0	0	0	0	0	0	0	0	0	0	0
Sm	none	none	Al2O3	73.985	0.88	0.13	0	7	0.6	3_Literature	0	0	1	0	0	0	0	0	0	0	0	0	0	0	0	0	0	0	0	0	0	0	0	0	0	0	0	0	0	0	0	0	0	0	0	0	0	0	0
Sm	none	none	Al2O3	73.985	0.8	0.2	0	4	1.6	3_Literature	0	0	1	0	0	0	0	0	0	0	0	0	0	0	0	0	0	0	0	0	0	0	0	0	0	0	0	0	0	0	0	0	0	0	0	0	0	0	0
none	none	none	Al2O3	73.985	0.8	0.2	0	4	1.4	3_Literature	0	0	1	0	0	0	0	0	0	0	0	0	0	0	0	0	0	0	0	0	0	0	0	0	0	0	0	0	0	0	0	0	0	0	0	0	0	0	0
none	none	none	Al2O3	73.985	0.8	0.2	0	4	1.4	3_Literature	0	0	1	0	0	0	0	0	0	0	0	0	0	0	0	0	0	0	0	0	0	0	0	0	0	0	0	0	0	0	0	0	0	0	0	0	0	0	0
Sm	none	none	Al2O3	73.985	0.8	0.2	0	4	2.2	3_Literature	0	0	1	0	0	0	0	0	0	0	0	0	0	0	0	0	0	0	0	0	0	0	0	0	0	0	0	0	0	0	0	0	0	0	0	0	0	0	0
Sm	none	none	Al2O3	73.985	0.8	0.2	0	4	3.9	3_Literature	0	0	1	0	0	0	0	0	0	0	0	0	0	0	0	0	0	0	0	0	0	0	0	0	0	0	0	0	0	0	0	0	0	0	0	0	0	0	0
none	none	none	Sm2O3	79.985	0.9	0.1	0	9	4.3	3_Literature	0	0	0	0	0	0	0	0	0	0	0	0	0	0	0	0	0	0	0	0	0	0	0	0	0	0	0	0	0	0	0	0	0	0	0	0	0	0	0
none	none	none	Sm2O3	79.985	0.88	0.13	0	7	5.9	3_Literature	0	0	0	0	0	0	0	0	0	0	0	0	0	0	0	0	0	0	0	0	0	0	0	0	0	0	0	0	0	0	0	0	0	0	0	0	0	0	0
none	none	none	Sm2O3	79.985	0.8	0.2	0	4	7.8	3_Literature	0	0	0	0	0	0	0	0	0	0	0	0	0	0	0	0	0	0	0	0	0	0	0	0	0	0	0	0	0	0	0	0	0	0	0	0	0	0	0
none	none	none	Sm2O3	79.985	0.9	0.1	0	9	5.7	3_Literature	0	0	0	0	0	0	0	0	0	0	0	0	0	0	0	0	0	0	0	0	0	0	0	0	0	0	0	0	0	0	0	0	0	0	0	0	0	0	0
none	none	none	Sm2O3	79.985	0.88	0.13	0	7	6.4	3_Literature	0	0	0	0	0	0	0	0	0	0	0	0	0	0	0	0	0	0	0	0	0	0	0	0	0	0	0	0	0	0	0	0	0	0	0	0	0	0	0
none	none	none	Sm2O3	79.985	0.8	0.2	0	4	7.6	3_Literature	0	0	0	0	0	0	0	0	0	0	0	0	0	0	0	0	0	0	0	0	0	0	0	0	0	0	0	0	0	0	0	0	0	0	0	0	0	0	0
Sm	none	none	Al2O3	79.985	0.9	0.1	0	9	1.2	3_Literature	0	0	1	0	0	0	0	0	0	0	0	0	0	0	0	0	0	0	0	0	0	0	0	0	0	0	0	0	0	0	0	0	0	0	0	0	0	0	0
Sm	none	none	Al2O3	79.985	0.88	0.13	0	7	1.7	3_Literature	0	0	1	0	0	0	0	0	0	0	0	0	0	0	0	0	0	0	0	0	0	0	0	0	0	0	0	0	0	0	0	0	0	0	0	0	0	0	0
Sm	none	none	Al2O3	79.985	0.8	0.2	0	4	4.7	3_Literature	0	0	1	0	0	0	0	0	0	0	0	0	0	0	0	0	0	0	0	0	0	0	0	0	0	0	0	0	0	0	0	0	0	0	0	0	0	0	0
Sm	none	none	Al2O3	79.985	0.8	0.2	0	4	3.9	3_Literature	0	0	1	0	0	0	0	0	0	0	0	0	0	0	0	0	0	0	0	0	0	0	0	0	0	0	0	0	0	0	0	0	0	0	0	0	0	0	0
Sm	none	none	Al2O3	79.985	0.8	0.2	0	4	4	3_Literature	0	0	1	0	0	0	0	0	0	0	0	0	0	0	0	0	0	0	0	0	0	0	0	0	0	0	0	0	0	0	0	0	0	0	0	0	0	0	0
Na	W	Mn	SiO2	84.985	0.6	0.2	0.2	3	21.1	3_Literature	0	0	0	0	0	0	0	0	0	0	0	0	0	0	0	0	0	0	0	0	0	0	0	0	0	0	0	0	0	0	0	0	0	0	0	0	0	0	0
Na	W	Mn	SiO2	84.985	0.64	0.16	0.2	4	18.6	3_Literature	0	0	0	0	0	0	0	0	0	0	0	0	0	0	0	0	0	0	0	0	0	0	0	0	0	0	0	0	0	0	0	0	0	0	0	0	0	0	0
Na	W	Mn	SiO2	84.985	0.67	0.13	0.2	5	16.3	3_Literature	0	0	0	0	0	0	0	0	0	0	0	0	0	0	0	0	0	0	0	0	0	0	0	0	0	0	0	0	0	0	0	0	0	0	0	0	0	0	0
Na	W	Mn	SiO2	84.985	0.69	0.11	0.2	6	14.7	3_Literature	0	0	0	0	0	0	0	0	0	0	0	0	0	0	0	0	0	0	0	0	0	0	0	0	0	0	0	0	0	0	0	0	0	0	0	0	0	0	0
Na	W	Mn	SiO2	77.485	0.64	0.16	0.2	4	9.4	3_Literature	0	0	0	0	0	0	0	0	0	0	0	0	0	0	0	0	0	0	0	0	0	0	0	0	0	0	0	0	0	0	0	0	0	0	0	0	0	0	0
Na	W	Mn	SiO2	79.985	0.64	0.16	0.2	4	13	3_Literature	0	0	0	0	0	0	0	0	0	0	0	0	0	0	0	0	0	0	0	0	0	0	0	0	0	0	0	0	0	0	0	0	0	0	0	0	0	0	0
Na	W	Mn	SiO2	82.485	0.64	0.16	0.2	4	16	3_Literature	0	0	0	0	0	0	0	0	0	0	0	0	0	0	0	0	0	0	0	0	0	0	0	0	0	0	0	0	0	0	0	0	0	0	0	0	0	0	0
none	Ti	none	SrO	84.985	0.1	0.05	0.9	2	12.1	3_Literature	0	0	0	0	0	0	0	0	0	0	0	0	0	0	0	0	0	0	0	0	0	0	0	0	0	0	0	0	0	0	0	0	0	0	0	0	0	0	0
none	Ti	Mg	SrO	84.985	0.1	0.05	0.9	2	19.4	3_Literature	0	0	0	0	0	0	0	0	0	0	0	0	0	0	0	0	0	0	0	0	0	0	0	0	0	0	0	0	0	0	0	0	0	0	0	0	0	0	0
none	Ti	Al	SrO	84.985	0.1	0.05	0.9	2	13	3_Literature	0	1	0	0	0	0	0	0	0	0	0	0	0	0	0	0	0	0	0	0	0	0	0	0	0	0	0	0	0	0	0	0	0	0	0	0	0	0	0
none	Ti	none	SrO	84.985	0.2	0.05	0.8	4	14.2	3_Literature	0	0	0	0	0	0	0	0	0	0	0	0	0	0	0	0	0	0	0	0	0	0	0	0	0	0	0	0	0	0	0	0	0	0	0	0	0	0	0
none	Ti	Mg	SrO	84.985	0.2	0.05	0.8	4	18.1	3_Literature	0	0	0	0	0	0	0	0	0	0	0	0	0	0	0	0	0	0	0	0	0	0	0	0	0	0	0	0	0	0	0	0	0	0	0	0	0	0	0
none	Ti	Al	SrO	84.985	0.2	0.05	0.8	4	13.8	3_Literature	0	1	0	0	0	0	0	0	0	0	0	0	0	0	0	0	0	0	0	0	0	0	0	0	0	0	0	0	0	0	0	0	0	0	0	0	0	0	0
none	Ti	none	SrO	89.985	0.1	0.05	0.9	2	18.6	3_Literature	0	0	0	0	0	0	0	0	0	0	0	0	0	0	0	0	0	0	0	0	0	0	0	0	0	0	0	0	0	0	0	0	0	0	0	0	0	0	0
none	Ti	Mg	SrO	89.985	0.1	0.05	0.9	2	21.6	3_Literature	0	0	0	0	0	0	0	0	0	0	0	0	0	0	0	0	0	0	0	0	0	0	0	0	0	0	0	0	0	0	0	0	0	0	0	0	0	0	0
none	Ti	Al	SrO	89.985	0.1	0.05	0.9	2	18.5	3_Literature	0	1	0	0	0	0	0	0	0	0	0	0	0	0	0	0	0	0	0	0	0	0	0	0	0	0	0	0	0	0	0	0	0	0	0	0	0	0	0
none	Ti	none	SrO	89.985	0.2	0.05	0.8	4	17.3	3_Literature	0	0	0	0	0	0	0	0	0	0	0	0	0	0	0	0	0	0	0	0	0	0	0	0	0	0	0	0	0	0	0	0	0	0	0	0	0	0	0
none	Ti	Mg	SrO	89.985	0.2	0.05	0.8	4	20.1	3_Literature	0	0	0	0	0	0	0	0	0	0	0	0	0	0	0	0	0	0	0	0	0	0	0	0	0	0	0	0	0	0	0	0	0	0	0	0	0	0	0
none	Ti	Al	SrO	89.985	0.2	0.05	0.8	4	18.2	3_Literature	0	1	0	0	0	0	0	0	0	0	0	0	0	0	0	0	0	0	0	0	0	0	0	0	0	0	0	0	0	0	0	0	0	0	0	0	0	0	0
Sm	none	none	MgO	54.985	0.8	0.2	0	4	8.8	3_Literature	0	0	0	0	0	0	0	0	0	0	0	0	0	0	0	0	0	0	0	0	0	0	0	0	0	0	0	0	0	0	0	0	0	0	0	0	0	0	0
Sm	none	none	MgO	57.485	0.8	0.2	0	4	9.4	3_Literature	0	0	0	0	0	0	0	0	0	0	0	0	0	0	0	0	0	0	0	0	0	0	0	0	0	0	0	0	0	0	0	0	0	0	0	0	0	0	0
Sm	none	none	MgO	59.985	0.8	0.2	0	4	10	3_Literature	0	0	0	0	0	0	0	0	0	0	0	0	0	0	0	0	0	0	0	0	0	0	0	0	0	0	0	0	0	0	0	0	0	0	0	0	0	0	0
Sm	none	none	MgO	62.485	0.8	0.2	0	4	10.6	3_Literature	0	0	0	0	0	0	0	0	0	0	0	0	0	0	0	0	0	0	0	0	0	0	0	0	0	0	0	0	0	0	0	0	0	0	0	0	0	0	0
Sm	none	none	MgO	64.985	0.8	0.2	0	4	10.9	3_Literature	0	0	0	0	0	0	0	0	0	0	0	0	0	0	0	0	0	0	0	0	0	0	0	0	0	0	0	0	0	0	0	0	0	0	0	0	0	0	0
Sm	none	none	MgO	67.485	0.8	0.2	0	4	11.5	3_Literature	0	0	0	0	0	0	0	0	0	0	0	0	0	0	0	0	0	0	0	0	0	0	0	0	0	0	0	0	0	0	0	0	0	0	0	0	0	0	0
Sm	none	none	MgO	69.985	0.8	0.2	0	4	11.1	3_Literature	0	0	0	0	0	0	0	0	0	0	0	0	0	0	0	0	0	0	0	0	0	0	0	0	0	0	0	0	0	0	0	0	0	0	0	0	0	0	0
Sm	none	none	MgO	71.985	0.8	0.2	0	4	10.9	3_Literature	0	0	0	0	0	0	0	0	0	0	0	0	0	0	0	0	0	0	0	0	0	0	0	0	0	0	0	0	0	0	0	0	0	0	0	0	0	0	0
Sm	none	none	MgO	73.985	0.8	0.2	0	4	10.8	3_Literature	0	0	0	0	0	0	0	0	0	0	0	0	0	0	0	0	0	0	0	0	0	0	0	0	0	0	0	0	0	0	0	0	0	0	0	0	0	0	0
Sm	none	none	MgO	75.985	0.8	0.2	0	4	10.5	3_Literature	0	0	0	0	0	0	0	0	0	0	0	0	0	0	0	0	0	0	0	0	0	0	0	0	0	0	0	0	0	0	0	0	0	0	0	0	0	0	0
Sm	none	none	MgO	77.985	0.8	0.2	0	4	9.9	3_Literature	0	0	0	0	0	0	0	0	0	0	0	0	0	0	0	0	0	0	0	0	0	0	0	0	0	0	0	0	0	0	0	0	0	0	0	0	0	0	0
Sm	none	none	MgO	79.985	0.8	0.2	0	4	9	3_Literature	0	0	0	0	0	0	0	0	0	0	0	0	0	0	0	0	0	0	0	0	0	0	0	0	0	0	0	0	0	0	0	0	0	0	0	0	0	0	0
Li	Sm	none	MgO	54.985	0.8	0.2	0	4	0	3_Literature	0	0	0	0	0	0	0	0	0	0	0	0	0	0	0	0	0	0	0	0	0	0	0	0	0	0	0	0	0	0	0	0	0	0	0	0	0	1	0
Li	Sm	none	MgO	57.485	0.8	0.2	0	4	0	3_Literature	0	0	0	0	0	0	0	0	0	0	0	0	0	0	0	0	0	0	0	0	0	0	0	0	0	0	0	0	0	0	0	0	0	0	0	0	0	1	0
Li	Sm	none	MgO	59.985	0.8	0.2	0	4	0.8	3_Literature	0	0	0	0	0	0	0	0	0	0	0	0	0	0	0	0	0	0	0	0	0	0	0	0	0	0	0	0	0	0	0	0	0	0	0	0	0	1	0
Li	Sm	none	MgO	62.485	0.8	0.2	0	4	15.2	3_Literature	0	0	0	0	0	0	0	0	0	0	0	0	0	0	0	0	0	0	0	0	0	0	0	0	0	0	0	0	0	0	0	0	0	0	0	0	0	1	0
Li	Sm	none	MgO	64.985	0.8	0.2	0	4	15.3	3_Literature	0	0	0	0	0	0	0	0	0	0	0	0	0	0	0	0	0	0	0	0	0	0	0	0	0	0	0	0	0	0	0	0	0	0	0	0	0	1	0
Li	Sm	none	MgO	67.485	0.8	0.2	0	4	14.7	3_Literature	0	0	0	0	0	0	0	0	0	0	0	0	0	0	0	0	0	0	0	0	0	0	0	0	0	0	0	0	0	0	0	0	0	0	0	0	0	1	0
Li	Sm	none	MgO	69.985	0.8	0.2	0	4	13.2	3_Literature	0	0	0	0	0	0	0	0	0	0	0	0	0	0	0	0	0	0	0	0	0	0	0	0	0	0	0	0	0	0	0	0	0	0	0	0	0	1	0
Li	Sm	none	MgO	71.985	0.8	0.2	0	4	11.9	3_Literature	0	0	0	0	0	0	0	0	0	0	0	0	0	0	0	0	0	0	0	0	0	0	0	0	0	0	0	0	0	0	0	0	0	0	0	0	0	1	0
Li	Sm	none	MgO	73.985	0.8	0.2	0	4	12.1	3_Literature	0	0	0	0	0	0	0	0	0	0	0	0	0	0	0	0	0	0	0	0	0	0	0	0	0	0	0	0	0	0	0	0	0	0	0	0	0	1	0
Li	Sm	none	MgO	75.985	0.8	0.2	0	4	11.9	3_Literature	0	0	0	0	0	0	0	0	0	0	0	0	0	0	0	0	0	0	0	0	0	0	0	0	0	0	0	0	0	0	0	0	0	0	0	0	0	1	0
Li	Sm	none	MgO	77.985	0.8	0.2	0	4	11.8	3_Literature	0	0	0	0	0	0	0	0	0	0	0	0	0	0	0	0	0	0	0	0	0	0	0	0	0	0	0	0	0	0	0	0	0	0	0	0	0	1	0
Li	Sm	none	MgO	79.985	0.8	0.2	0	4	11.5	3_Literature	0	0	0	0	0	0	0	0	0	0	0	0	0	0	0	0	0	0	0	0	0	0	0	0	0	0	0	0	0	0	0	0	0	0	0	0	0	1	0
Li	Tb	none	MgO	49.985	0.8	0.2	0	4	0	3_Literature	0	0	0	0	0	0	0	0	0	0	0	0	0	0	0	0	0	0	0	0	0	0	0	0	0	0	0	0	0	0	0	0	0	0	0	0	0	1	0
Li	Tb	none	MgO	54.985	0.8	0.2	0	4	8.9	3_Literature	0	0	0	0	0	0	0	0	0	0	0	0	0	0	0	0	0	0	0	0	0	0	0	0	0	0	0	0	0	0	0	0	0	0	0	0	0	1	0
Li	Tb	none	MgO	59.985	0.8	0.2	0	4	13.2	3_Literature	0	0	0	0	0	0	0	0	0	0	0	0	0	0	0	0	0	0	0	0	0	0	0	0	0	0	0	0	0	0	0	0	0	0	0	0	0	1	0
Li	Tb	none	MgO	64.985	0.8	0.2	0	4	14.7	3_Literature	0	0	0	0	0	0	0	0	0	0	0	0	0	0	0	0	0	0	0	0	0	0	0	0	0	0	0	0	0	0	0	0	0	0	0	0	0	1	0
Li	Tb	none	MgO	69.985	0.8	0.2	0	4	14.3	3_Literature	0	0	0	0	0	0	0	0	0	0	0	0	0	0	0	0	0	0	0	0	0	0	0	0	0	0	0	0	0	0	0	0	0	0	0	0	0	1	0
Li	Tb	none	MgO	74.985	0.8	0.2	0	4	13.9	3_Literature	0	0	0	0	0	0	0	0	0	0	0	0	0	0	0	0	0	0	0	0	0	0	0	0	0	0	0	0	0	0	0	0	0	0	0	0	0	1	0
Li	Tb	none	MgO	79.985	0.8	0.2	0	4	12.5	3_Literature	0	0	0	0	0	0	0	0	0	0	0	0	0	0	0	0	0	0	0	0	0	0	0	0	0	0	0	0	0	0	0	0	0	0	0	0	0	1	0
Sm	none	none	MgO	69.985	0.8	0.2	0	4	12.7	3_Literature	0	0	0	0	0	0	0	0	0	0	0	0	0	0	0	0	0	0	0	0	0	0	0	0	0	0	0	0	0	0	0	0	0	0	0	0	0	0	0
Li	Sm	none	MgO	69.985	0.8	0.2	0	4	15.3	3_Literature	0	0	0	0	0	0	0	0	0	0	0	0	0	0	0	0	0	0	0	0	0	0	0	0	0	0	0	0	0	0	0	0	0	0	0	0	0	1	0
Li	Sm	none	MgO	69.985	0.8	0.2	0	4	16.3	3_Literature	0	0	0	0	0	0	0	0	0	0	0	0	0	0	0	0	0	0	0	0	0	0	0	0	0	0	0	0	0	0	0	0	0	0	0	0	0	1	0
Li	Sm	none	MgO	69.985	0.8	0.2	0	4	14.6	3_Literature	0	0	0	0	0	0	0	0	0	0	0	0	0	0	0	0	0	0	0	0	0	0	0	0	0	0	0	0	0	0	0	0	0	0	0	0	0	1	0
Li	Sm	none	MgO	69.985	0.8	0.2	0	4	15.2	3_Literature	0	0	0	0	0	0	0	0	0	0	0	0	0	0	0	0	0	0	0	0	0	0	0	0	0	0	0	0	0	0	0	0	0	0	0	0	0	1	0
Tb	none	none	MgO	69.985	0.8	0.2	0	4	7.7	3_Literature	0	0	0	0	0	0	0	0	0	0	0	0	0	0	0	0	0	0	0	0	0	0	0	0	0	0	0	0	0	0	0	0	0	0	0	0	0	0	0
Li	Tb	none	MgO	69.985	0.8	0.2	0	4	15.9	3_Literature	0	0	0	0	0	0	0	0	0	0	0	0	0	0	0	0	0	0	0	0	0	0	0	0	0	0	0	0	0	0	0	0	0	0	0	0	0	1	0
Li	Tb	none	MgO	69.985	0.8	0.2	0	4	15	3_Literature	0	0	0	0	0	0	0	0	0	0	0	0	0	0	0	0	0	0	0	0	0	0	0	0	0	0	0	0	0	0	0	0	0	0	0	0	0	1	0
Li	Tb	none	MgO	69.985	0.8	0.2	0	4	13.7	3_Literature	0	0	0	0	0	0	0	0	0	0	0	0	0	0	0	0	0	0	0	0	0	0	0	0	0	0	0	0	0	0	0	0	0	0	0	0	0	1	0
Li	Tb	none	MgO	69.985	0.8	0.2	0	4	12.6	3_Literature	0	0	0	0	0	0	0	0	0	0	0	0	0	0	0	0	0	0	0	0	0	0	0	0	0	0	0	0	0	0	0	0	0	0	0	0	0	1	0
Li	none	none	MgO	64.985	0.8	0.2	0	4	1.7	3_Literature	0	0	0	0	0	0	0	0	0	0	0	0	0	0	0	0	0	0	0	0	0	0	0	0	0	0	0	0	0	0	0	0	0	0	0	0	0	1	0
Li	none	none	MgO	69.985	0.8	0.2	0	4	8.9	3_Literature	0	0	0	0	0	0	0	0	0	0	0	0	0	0	0	0	0	0	0	0	0	0	0	0	0	0	0	0	0	0	0	0	0	0	0	0	0	1	0
Li	none	none	MgO	64.985	0.8	0.2	0	4	2.8	3_Literature	0	0	0	0	0	0	0	0	0	0	0	0	0	0	0	0	0	0	0	0	0	0	0	0	0	0	0	0	0	0	0	0	0	0	0	0	0	1	0
Li	none	none	MgO	69.985	0.8	0.2	0	4	10.6	3_Literature	0	0	0	0	0	0	0	0	0	0	0	0	0	0	0	0	0	0	0	0	0	0	0	0	0	0	0	0	0	0	0	0	0	0	0	0	0	1	0
Sm	none	none	MgO	64.985	0.8	0.2	0	4	10.8	3_Literature	0	0	0	0	0	0	0	0	0	0	0	0	0	0	0	0	0	0	0	0	0	0	0	0	0	0	0	0	0	0	0	0	0	0	0	0	0	0	0
Sm	none	none	MgO	69.985	0.8	0.2	0	4	11.2	3_Literature	0	0	0	0	0	0	0	0	0	0	0	0	0	0	0	0	0	0	0	0	0	0	0	0	0	0	0	0	0	0	0	0	0	0	0	0	0	0	0
Li	Sm	none	MgO	64.985	0.8	0.2	0	4	3.3	3_Literature	0	0	0	0	0	0	0	0	0	0	0	0	0	0	0	0	0	0	0	0	0	0	0	0	0	0	0	0	0	0	0	0	0	0	0	0	0	1	0
Li	Sm	none	MgO	69.985	0.8	0.2	0	4	13	3_Literature	0	0	0	0	0	0	0	0	0	0	0	0	0	0	0	0	0	0	0	0	0	0	0	0	0	0	0	0	0	0	0	0	0	0	0	0	0	1	0
Tb	none	none	MgO	64.985	0.8	0.2	0	4	5.5	3_Literature	0	0	0	0	0	0	0	0	0	0	0	0	0	0	0	0	0	0	0	0	0	0	0	0	0	0	0	0	0	0	0	0	0	0	0	0	0	0	0
Tb	none	none	MgO	69.985	0.8	0.2	0	4	7.2	3_Literature	0	0	0	0	0	0	0	0	0	0	0	0	0	0	0	0	0	0	0	0	0	0	0	0	0	0	0	0	0	0	0	0	0	0	0	0	0	0	0
Li	Tb	none	MgO	64.985	0.8	0.2	0	4	13.6	3_Literature	0	0	0	0	0	0	0	0	0	0	0	0	0	0	0	0	0	0	0	0	0	0	0	0	0	0	0	0	0	0	0	0	0	0	0	0	0	1	0
Li	Tb	none	MgO	69.985	0.8	0.2	0	4	13.8	3_Literature	0	0	0	0	0	0	0	0	0	0	0	0	0	0	0	0	0	0	0	0	0	0	0	0	0	0	0	0	0	0	0	0	0	0	0	0	0	1	0
Li	Tb	none	MgO	69.985	0.8	0.2	0	4	11.1	3_Literature	0	0	0	0	0	0	0	0	0	0	0	0	0	0	0	0	0	0	0	0	0	0	0	0	0	0	0	0	0	0	0	0	0	0	0	0	0	1	0
Sm	none	none	MgO	69.985	0.8	0.2	0	4	12.3	3_Literature	0	0	0	0	0	0	0	0	0	0	0	0	0	0	0	0	0	0	0	0	0	0	0	0	0	0	0	0	0	0	0	0	0	0	0	0	0	0	0
Li	Sm	none	MgO	69.985	0.8	0.2	0	4	15.8	3_Literature	0	0	0	0	0	0	0	0	0	0	0	0	0	0	0	0	0	0	0	0	0	0	0	0	0	0	0	0	0	0	0	0	0	0	0	0	0	1	0
Li	Sm	none	MgO	69.985	0.8	0.2	0	4	12.6	3_Literature	0	0	0	0	0	0	0	0	0	0	0	0	0	0	0	0	0	0	0	0	0	0	0	0	0	0	0	0	0	0	0	0	0	0	0	0	0	1	0
Tb	none	none	MgO	69.985	0.8	0.2	0	4	10.7	3_Literature	0	0	0	0	0	0	0	0	0	0	0	0	0	0	0	0	0	0	0	0	0	0	0	0	0	0	0	0	0	0	0	0	0	0	0	0	0	0	0
Li	Tb	none	MgO	69.985	0.8	0.2	0	4	15.8	3_Literature	0	0	0	0	0	0	0	0	0	0	0	0	0	0	0	0	0	0	0	0	0	0	0	0	0	0	0	0	0	0	0	0	0	0	0	0	0	1	0
Li	Tb	none	MgO	69.985	0.8	0.2	0	4	15.1	3_Literature	0	0	0	0	0	0	0	0	0	0	0	0	0	0	0	0	0	0	0	0	0	0	0	0	0	0	0	0	0	0	0	0	0	0	0	0	0	1	0
none	none	none	MgO	64.985	0.8	0.2	0	4	8.8	3_Literature	0	0	0	0	0	0	0	0	0	0	0	0	0	0	0	0	0	0	0	0	0	0	0	0	0	0	0	0	0	0	0	0	0	0	0	0	0	0	0
none	none	none	MgO	69.985	0.8	0.2	0	4	8.8	3_Literature	0	0	0	0	0	0	0	0	0	0	0	0	0	0	0	0	0	0	0	0	0	0	0	0	0	0	0	0	0	0	0	0	0	0	0	0	0	0	0
Mn	none	none	SiO2	79.985	0.83	0.17	0	5	2.2	3_Literature	0	0	0	0	0	0	0	0	0	0	0	0	0	0	0	0	0	0	0	0	0	0	0	0	0	0	0	0	0	0	0	0	0	0	0	0	0	0	0
Mn	Na	W	SiO2	79.985	0.83	0.17	0	5	13.2	3_Literature	0	0	0	0	0	0	0	0	0	0	0	0	0	0	0	0	0	0	0	0	0	0	0	0	0	0	0	0	0	0	0	0	0	0	0	0	0	0	0
Mn	Na	W	SiO2	79.985	0.83	0.17	0	5	16.8	3_Literature	0	0	0	0	0	0	0	0	0	0	0	0	0	0	0	0	0	0	0	0	0	0	0	0	0	0	0	0	0	0	0	0	0	0	0	0	0	0	0
Mn	Na	W	SiO2	79.985	0.83	0.17	0	5	18.3	3_Literature	0	0	0	0	0	0	0	0	0	0	0	0	0	0	0	0	0	0	0	0	0	0	0	0	0	0	0	0	0	0	0	0	0	0	0	0	0	0	0
Mn	Na	W	SiO2	79.985	0.83	0.17	0	5	16.7	3_Literature	0	0	0	0	0	0	0	0	0	0	0	0	0	0	0	0	0	0	0	0	0	0	0	0	0	0	0	0	0	0	0	0	0	0	0	0	0	0	0
Mn	Na	W	SiO2	79.985	0.83	0.17	0	5	12.4	3_Literature	0	0	0	0	0	0	0	0	0	0	0	0	0	0	0	0	0	0	0	0	0	0	0	0	0	0	0	0	0	0	0	0	0	0	0	0	0	0	0
Mn	Na	W	SiO2	79.985	0.83	0.17	0	5	11.9	3_Literature	0	0	0	0	0	0	0	0	0	0	0	0	0	0	0	0	0	0	0	0	0	0	0	0	0	0	0	0	0	0	0	0	0	0	0	0	0	0	0
Na	W	none	SiO2	79.985	0.83	0.17	0	5	1.8	3_Literature	0	0	0	0	0	0	0	0	0	0	0	0	0	0	0	0	0	0	0	0	0	0	0	0	0	0	0	0	0	0	0	0	0	0	0	0	0	0	0
Mn	Na	W	SiO2	79.985	0.83	0.17	0	5	4.8	3_Literature	0	0	0	0	0	0	0	0	0	0	0	0	0	0	0	0	0	0	0	0	0	0	0	0	0	0	0	0	0	0	0	0	0	0	0	0	0	0	0
Mn	Na	W	SiO2	79.985	0.83	0.17	0	5	18.5	3_Literature	0	0	0	0	0	0	0	0	0	0	0	0	0	0	0	0	0	0	0	0	0	0	0	0	0	0	0	0	0	0	0	0	0	0	0	0	0	0	0
Mn	Na	W	SiO2	79.985	0.83	0.17	0	5	16.8	3_Literature	0	0	0	0	0	0	0	0	0	0	0	0	0	0	0	0	0	0	0	0	0	0	0	0	0	0	0	0	0	0	0	0	0	0	0	0	0	0	0
Mn	Na	W	SiO2	79.985	0.83	0.17	0	5	16.7	3_Literature	0	0	0	0	0	0	0	0	0	0	0	0	0	0	0	0	0	0	0	0	0	0	0	0	0	0	0	0	0	0	0	0	0	0	0	0	0	0	0
Mn	Na	W	SiO2	79.985	0.83	0.17	0	5	16.9	3_Literature	0	0	0	0	0	0	0	0	0	0	0	0	0	0	0	0	0	0	0	0	0	0	0	0	0	0	0	0	0	0	0	0	0	0	0	0	0	0	0
Mn	Na	W	SiO2	76.985	0.83	0.17	0	5	9.7	3_Literature	0	0	0	0	0	0	0	0	0	0	0	0	0	0	0	0	0	0	0	0	0	0	0	0	0	0	0	0	0	0	0	0	0	0	0	0	0	0	0
Mn	Na	W	SiO2	78.985	0.83	0.17	0	5	14.6	3_Literature	0	0	0	0	0	0	0	0	0	0	0	0	0	0	0	0	0	0	0	0	0	0	0	0	0	0	0	0	0	0	0	0	0	0	0	0	0	0	0
Mn	Na	W	SiO2	80.985	0.83	0.17	0	5	18.3	3_Literature	0	0	0	0	0	0	0	0	0	0	0	0	0	0	0	0	0	0	0	0	0	0	0	0	0	0	0	0	0	0	0	0	0	0	0	0	0	0	0
Mn	Na	W	SiO2	82.985	0.83	0.17	0	5	16	3_Literature	0	0	0	0	0	0	0	0	0	0	0	0	0	0	0	0	0	0	0	0	0	0	0	0	0	0	0	0	0	0	0	0	0	0	0	0	0	0	0
Mn	Na	W	SiO2	84.985	0.83	0.17	0	5	16	3_Literature	0	0	0	0	0	0	0	0	0	0	0	0	0	0	0	0	0	0	0	0	0	0	0	0	0	0	0	0	0	0	0	0	0	0	0	0	0	0	0
Mn	Na	W	SiO2	86.985	0.83	0.17	0	5	15.1	3_Literature	0	0	0	0	0	0	0	0	0	0	0	0	0	0	0	0	0	0	0	0	0	0	0	0	0	0	0	0	0	0	0	0	0	0	0	0	0	0	0
Mn	Na	W	SiO2	88.985	0.83	0.17	0	5	14.1	3_Literature	0	0	0	0	0	0	0	0	0	0	0	0	0	0	0	0	0	0	0	0	0	0	0	0	0	0	0	0	0	0	0	0	0	0	0	0	0	0	0
Mn	Na	W	SiO2	90.985	0.67	0.33	0	2	19.6	3_Literature	0	0	0	0	0	0	0	0	0	0	0	0	0	0	0	0	0	0	0	0	0	0	0	0	0	0	0	0	0	0	0	0	0	0	0	0	0	0	0
Mn	Na	W	SiO2	90.985	0.75	0.25	0	3	18.3	3_Literature	0	0	0	0	0	0	0	0	0	0	0	0	0	0	0	0	0	0	0	0	0	0	0	0	0	0	0	0	0	0	0	0	0	0	0	0	0	0	0
Mn	Na	W	SiO2	90.985	0.8	0.2	0	4	17.5	3_Literature	0	0	0	0	0	0	0	0	0	0	0	0	0	0	0	0	0	0	0	0	0	0	0	0	0	0	0	0	0	0	0	0	0	0	0	0	0	0	0
Mn	Na	W	SiO2	90.985	0.83	0.17	0	5	17.6	3_Literature	0	0	0	0	0	0	0	0	0	0	0	0	0	0	0	0	0	0	0	0	0	0	0	0	0	0	0	0	0	0	0	0	0	0	0	0	0	0	0
Mn	Na	W	SiO2	90.985	0.86	0.14	0	6	11.4	3_Literature	0	0	0	0	0	0	0	0	0	0	0	0	0	0	0	0	0	0	0	0	0	0	0	0	0	0	0	0	0	0	0	0	0	0	0	0	0	0	0
Li	W	Mn	SiO2	74.185	0.68	0.32	0	2.1	1	3_Literature	0	0	0	0	0	0	0	0	0	0	0	0	0	0	0	0	0	0	0	0	0	0	0	0	0	0	0	0	0	0	0	0	0	0	0	0	0	1	0
Li	W	Mn	SiO2	80.085	0.67	0.33	0	2	9	3_Literature	0	0	0	0	0	0	0	0	0	0	0	0	0	0	0	0	0	0	0	0	0	0	0	0	0	0	0	0	0	0	0	0	0	0	0	0	0	1	0
Li	W	Mn	SiO2	85.385	0.68	0.32	0	2.1	24	3_Literature	0	0	0	0	0	0	0	0	0	0	0	0	0	0	0	0	0	0	0	0	0	0	0	0	0	0	0	0	0	0	0	0	0	0	0	0	0	1	0
Li	W	Mn	SiO2	88.485	0.69	0.31	0	2.2	23	3_Literature	0	0	0	0	0	0	0	0	0	0	0	0	0	0	0	0	0	0	0	0	0	0	0	0	0	0	0	0	0	0	0	0	0	0	0	0	0	1	0
Li	W	Mn	SiO2	89.685	0.68	0.32	0	2.1	21	3_Literature	0	0	0	0	0	0	0	0	0	0	0	0	0	0	0	0	0	0	0	0	0	0	0	0	0	0	0	0	0	0	0	0	0	0	0	0	0	1	0
Li	W	Mn	SiO2	93.185	0.7	0.3	0	2.3	20	3_Literature	0	0	0	0	0	0	0	0	0	0	0	0	0	0	0	0	0	0	0	0	0	0	0	0	0	0	0	0	0	0	0	0	0	0	0	0	0	1	0
Li	W	Mn	SiO2	74.585	0.67	0.33	0	2	0	3_Literature	0	0	0	0	0	0	0	0	0	0	0	0	0	0	0	0	0	0	0	0	0	0	0	0	0	0	0	0	0	0	0	0	0	0	0	0	0	1	0
Li	W	Mn	SiO2	77.085	0.67	0.33	0	2	2	3_Literature	0	0	0	0	0	0	0	0	0	0	0	0	0	0	0	0	0	0	0	0	0	0	0	0	0	0	0	0	0	0	0	0	0	0	0	0	0	1	0
Li	W	Mn	SiO2	80.485	0.67	0.33	0	2	6	3_Literature	0	0	0	0	0	0	0	0	0	0	0	0	0	0	0	0	0	0	0	0	0	0	0	0	0	0	0	0	0	0	0	0	0	0	0	0	0	1	0
Li	W	Mn	SiO2	90.485	0.67	0.33	0	2	24	3_Literature	0	0	0	0	0	0	0	0	0	0	0	0	0	0	0	0	0	0	0	0	0	0	0	0	0	0	0	0	0	0	0	0	0	0	0	0	0	1	0
Li	W	Mn	SiO2	73.085	0.66	0.34	0	1.9	2	3_Literature	0	0	0	0	0	0	0	0	0	0	0	0	0	0	0	0	0	0	0	0	0	0	0	0	0	0	0	0	0	0	0	0	0	0	0	0	0	1	0
Na	W	Mn	SiO2	78.285	0.64	0.36	0	1.8	10	3_Literature	0	0	0	0	0	0	0	0	0	0	0	0	0	0	0	0	0	0	0	0	0	0	0	0	0	0	0	0	0	0	0	0	0	0	0	0	0	0	0
Na	W	Mn	SiO2	87.985	0.66	0.34	0	1.9	22	3_Literature	0	0	0	0	0	0	0	0	0	0	0	0	0	0	0	0	0	0	0	0	0	0	0	0	0	0	0	0	0	0	0	0	0	0	0	0	0	0	0
Na	W	Mn	SiO2	90.185	0.64	0.36	0	1.8	21	3_Literature	0	0	0	0	0	0	0	0	0	0	0	0	0	0	0	0	0	0	0	0	0	0	0	0	0	0	0	0	0	0	0	0	0	0	0	0	0	0	0
Na	W	Mn	SiO2	84.785	0.69	0.31	0	2.2	16	3_Literature	0	0	0	0	0	0	0	0	0	0	0	0	0	0	0	0	0	0	0	0	0	0	0	0	0	0	0	0	0	0	0	0	0	0	0	0	0	0	0
Na	W	Mn	SiO2	87.885	0.69	0.31	0	2.2	20	3_Literature	0	0	0	0	0	0	0	0	0	0	0	0	0	0	0	0	0	0	0	0	0	0	0	0	0	0	0	0	0	0	0	0	0	0	0	0	0	0	0
Na	W	Mn	SiO2	91.185	0.71	0.29	0	2.4	22	3_Literature	0	0	0	0	0	0	0	0	0	0	0	0	0	0	0	0	0	0	0	0	0	0	0	0	0	0	0	0	0	0	0	0	0	0	0	0	0	0	0
Mn	Na	W	SiO2	66.485	0.64	0.16	0.2	4	2.4	3_Literature	0	0	0	0	0	0	0	0	0	0	0	0	0	0	0	0	0	0	0	0	0	0	0	0	0	0	0	0	0	0	0	0	0	0	0	0	0	0	0
Mn	Na	W	SiO2	71.485	0.64	0.16	0.2	4	18.4	3_Literature	0	0	0	0	0	0	0	0	0	0	0	0	0	0	0	0	0	0	0	0	0	0	0	0	0	0	0	0	0	0	0	0	0	0	0	0	0	0	0
Mn	Na	W	SiO2	72.985	0.64	0.16	0.2	4	20.2	3_Literature	0	0	0	0	0	0	0	0	0	0	0	0	0	0	0	0	0	0	0	0	0	0	0	0	0	0	0	0	0	0	0	0	0	0	0	0	0	0	0
Mn	Na	W	SiO2	73.985	0.64	0.16	0.2	4	21.1	3_Literature	0	0	0	0	0	0	0	0	0	0	0	0	0	0	0	0	0	0	0	0	0	0	0	0	0	0	0	0	0	0	0	0	0	0	0	0	0	0	0
Mn	Na	W	SiO2	75.785	0.64	0.16	0.2	4	19.5	3_Literature	0	0	0	0	0	0	0	0	0	0	0	0	0	0	0	0	0	0	0	0	0	0	0	0	0	0	0	0	0	0	0	0	0	0	0	0	0	0	0
Mn	Na	W	SiO2	75.985	0.64	0.16	0.2	4	19.6	3_Literature	0	0	0	0	0	0	0	0	0	0	0	0	0	0	0	0	0	0	0	0	0	0	0	0	0	0	0	0	0	0	0	0	0	0	0	0	0	0	0
Mn	Na	W	SiO2	78.085	0.64	0.16	0.2	4	17.9	3_Literature	0	0	0	0	0	0	0	0	0	0	0	0	0	0	0	0	0	0	0	0	0	0	0	0	0	0	0	0	0	0	0	0	0	0	0	0	0	0	0
Mn	Na	W	SiO2	80.585	0.64	0.16	0.2	4	15.8	3_Literature	0	0	0	0	0	0	0	0	0	0	0	0	0	0	0	0	0	0	0	0	0	0	0	0	0	0	0	0	0	0	0	0	0	0	0	0	0	0	0
Li	W	Mn	SiO2	90.185	0.6	0.4	0	1.5	18.4	3_Literature	0	0	0	0	0	0	0	0	0	0	0	0	0	0	0	0	0	0	0	0	0	0	0	0	0	0	0	0	0	0	0	0	0	0	0	0	0	1	0
Li	W	Mn	SiO2	74.185	0.68	0.32	0	2.1	0.8	3_Literature	0	0	0	0	0	0	0	0	0	0	0	0	0	0	0	0	0	0	0	0	0	0	0	0	0	0	0	0	0	0	0	0	0	0	0	0	0	1	0
Li	W	Mn	SiO2	80.085	0.67	0.33	0	2	9	3_Literature	0	0	0	0	0	0	0	0	0	0	0	0	0	0	0	0	0	0	0	0	0	0	0	0	0	0	0	0	0	0	0	0	0	0	0	0	0	1	0
Li	W	Mn	SiO2	85.385	0.68	0.32	0	2.1	23.9	3_Literature	0	0	0	0	0	0	0	0	0	0	0	0	0	0	0	0	0	0	0	0	0	0	0	0	0	0	0	0	0	0	0	0	0	0	0	0	0	1	0
Li	W	Mn	SiO2	88.485	0.69	0.31	0	2.2	23.5	3_Literature	0	0	0	0	0	0	0	0	0	0	0	0	0	0	0	0	0	0	0	0	0	0	0	0	0	0	0	0	0	0	0	0	0	0	0	0	0	1	0
Li	W	Mn	SiO2	89.685	0.68	0.32	0	2.1	20.7	3_Literature	0	0	0	0	0	0	0	0	0	0	0	0	0	0	0	0	0	0	0	0	0	0	0	0	0	0	0	0	0	0	0	0	0	0	0	0	0	1	0
Li	W	Mn	SiO2	93.185	0.7	0.3	0	2.3	19.8	3_Literature	0	0	0	0	0	0	0	0	0	0	0	0	0	0	0	0	0	0	0	0	0	0	0	0	0	0	0	0	0	0	0	0	0	0	0	0	0	1	0
Li	W	Mn	SiO2	74.585	0.67	0.33	0	2	0	3_Literature	0	0	0	0	0	0	0	0	0	0	0	0	0	0	0	0	0	0	0	0	0	0	0	0	0	0	0	0	0	0	0	0	0	0	0	0	0	1	0
Li	W	Mn	SiO2	77.085	0.67	0.33	0	2	1.5	3_Literature	0	0	0	0	0	0	0	0	0	0	0	0	0	0	0	0	0	0	0	0	0	0	0	0	0	0	0	0	0	0	0	0	0	0	0	0	0	1	0
Li	W	Mn	SiO2	80.485	0.67	0.33	0	2	6.7	3_Literature	0	0	0	0	0	0	0	0	0	0	0	0	0	0	0	0	0	0	0	0	0	0	0	0	0	0	0	0	0	0	0	0	0	0	0	0	0	1	0
Li	W	Mn	SiO2	90.485	0.67	0.33	0	2	24.7	3_Literature	0	0	0	0	0	0	0	0	0	0	0	0	0	0	0	0	0	0	0	0	0	0	0	0	0	0	0	0	0	0	0	0	0	0	0	0	0	1	0
Na	W	Mn	SiO2	73.085	0.66	0.34	0	1.9	2.6	3_Literature	0	0	0	0	0	0	0	0	0	0	0	0	0	0	0	0	0	0	0	0	0	0	0	0	0	0	0	0	0	0	0	0	0	0	0	0	0	0	0
Na	W	Mn	SiO2	78.285	0.64	0.36	0	1.8	10.4	3_Literature	0	0	0	0	0	0	0	0	0	0	0	0	0	0	0	0	0	0	0	0	0	0	0	0	0	0	0	0	0	0	0	0	0	0	0	0	0	0	0
Na	W	Mn	SiO2	87.985	0.66	0.34	0	1.9	22.1	3_Literature	0	0	0	0	0	0	0	0	0	0	0	0	0	0	0	0	0	0	0	0	0	0	0	0	0	0	0	0	0	0	0	0	0	0	0	0	0	0	0
Na	W	Mn	SiO2	90.185	0.64	0.36	0	1.8	21.2	3_Literature	0	0	0	0	0	0	0	0	0	0	0	0	0	0	0	0	0	0	0	0	0	0	0	0	0	0	0	0	0	0	0	0	0	0	0	0	0	0	0
Na	W	Mn	SiO2	84.785	0.69	0.31	0	2.2	15.9	3_Literature	0	0	0	0	0	0	0	0	0	0	0	0	0	0	0	0	0	0	0	0	0	0	0	0	0	0	0	0	0	0	0	0	0	0	0	0	0	0	0
Na	W	Mn	SiO2	87.885	0.69	0.31	0	2.2	20	3_Literature	0	0	0	0	0	0	0	0	0	0	0	0	0	0	0	0	0	0	0	0	0	0	0	0	0	0	0	0	0	0	0	0	0	0	0	0	0	0	0
Na	W	Mn	SiO2	91.185	0.71	0.29	0	2.4	21.6	3_Literature	0	0	0	0	0	0	0	0	0	0	0	0	0	0	0	0	0	0	0	0	0	0	0	0	0	0	0	0	0	0	0	0	0	0	0	0	0	0	0
W	none	none	La2O3	74.985	0.4	0.1	0.5	4	1.9	3_Literature	0	0	0	0	0	0	0	0	0	0	0	0	0	0	0	0	0	0	0	0	0	0	0	0	0	0	0	0	0	0	0	0	0	0	0	0	1	0	0
Na	W	none	La2O3	74.985	0.4	0.1	0.5	4	8.8	3_Literature	0	0	0	0	0	0	0	0	0	0	0	0	0	0	0	0	0	0	0	0	0	0	0	0	0	0	0	0	0	0	0	0	0	0	0	0	1	0	0
Mn	none	none	La2O3	74.985	0.4	0.1	0.5	4	5.9	3_Literature	0	0	0	0	0	0	0	0	0	0	0	0	0	0	0	0	0	0	0	0	0	0	0	0	0	0	0	0	0	0	0	0	0	0	0	0	1	0	0
Na	W	Mn	La2O3	74.985	0.4	0.1	0.5	4	6.1	3_Literature	0	0	0	0	0	0	0	0	0	0	0	0	0	0	0	0	0	0	0	0	0	0	0	0	0	0	0	0	0	0	0	0	0	0	0	0	1	0	0
W	none	none	CaO	74.985	0.4	0.1	0.5	4	2.6	3_Literature	0	0	0	0	0	0	0	0	0	0	0	0	0	1	0	0	0	0	0	0	0	0	0	0	0	0	0	0	0	0	0	0	0	0	0	0	0	0	0
Na	W	none	CaO	74.985	0.4	0.1	0.5	4	3.2	3_Literature	0	0	0	0	0	0	0	0	0	0	0	0	0	1	0	0	0	0	0	0	0	0	0	0	0	0	0	0	0	0	0	0	0	0	0	0	0	0	0
Mn	none	none	CaO	74.985	0.4	0.1	0.5	4	3	3_Literature	0	0	0	0	0	0	0	0	0	0	0	0	0	1	0	0	0	0	0	0	0	0	0	0	0	0	0	0	0	0	0	0	0	0	0	0	0	0	0
Na	W	Mn	CaO	74.985	0.4	0.1	0.5	4	5	3_Literature	0	0	0	0	0	0	0	0	0	0	0	0	0	1	0	0	0	0	0	0	0	0	0	0	0	0	0	0	0	0	0	0	0	0	0	0	0	0	0
W	none	none	Al2O3	74.985	0.4	0.1	0.5	4	0.1	3_Literature	0	0	1	0	0	0	0	0	0	0	0	0	0	0	0	0	0	0	0	0	0	0	0	0	0	0	0	0	0	0	0	0	0	0	0	0	0	0	0
Na	W	none	Al2O3	74.985	0.4	0.1	0.5	4	1	3_Literature	0	0	1	0	0	0	0	0	0	0	0	0	0	0	0	0	0	0	0	0	0	0	0	0	0	0	0	0	0	0	0	0	0	0	0	0	0	0	0
Mn	none	none	Al2O3	74.985	0.4	0.1	0.5	4	0.2	3_Literature	0	0	1	0	0	0	0	0	0	0	0	0	0	0	0	0	0	0	0	0	0	0	0	0	0	0	0	0	0	0	0	0	0	0	0	0	0	0	0
Na	W	Mn	Al2O3	74.985	0.4	0.1	0.5	4	3.3	3_Literature	0	0	1	0	0	0	0	0	0	0	0	0	0	0	0	0	0	0	0	0	0	0	0	0	0	0	0	0	0	0	0	0	0	0	0	0	0	0	0
W	none	none	ZrO2	74.985	0.4	0.1	0.5	4	0.4	3_Literature	0	0	0	0	0	0	0	0	0	0	0	0	0	0	0	0	0	0	0	0	0	0	0	0	0	0	0	0	0	0	0	0	0	0	0	0	0	0	0
Na	W	none	ZrO2	74.985	0.4	0.1	0.5	4	1.8	3_Literature	0	0	0	0	0	0	0	0	0	0	0	0	0	0	0	0	0	0	0	0	0	0	0	0	0	0	0	0	0	0	0	0	0	0	0	0	0	0	0
Mn	none	none	ZrO2	74.985	0.4	0.1	0.5	4	1.3	3_Literature	0	0	0	0	0	0	0	0	0	0	0	0	0	0	0	0	0	0	0	0	0	0	0	0	0	0	0	0	0	0	0	0	0	0	0	0	0	0	0
Na	W	Mn	ZrO2	74.985	0.4	0.1	0.5	4	2.1	3_Literature	0	0	0	0	0	0	0	0	0	0	0	0	0	0	0	0	0	0	0	0	0	0	0	0	0	0	0	0	0	0	0	0	0	0	0	0	0	0	0
W	none	none	SiO2	74.985	0.4	0.1	0.5	4	0.8	3_Literature	0	0	0	0	0	0	0	0	0	0	0	0	0	0	0	0	0	0	0	0	0	0	0	0	0	0	0	0	0	0	0	0	0	0	0	0	0	0	0
Na	W	none	SiO2	74.985	0.4	0.1	0.5	4	0.9	3_Literature	0	0	0	0	0	0	0	0	0	0	0	0	0	0	0	0	0	0	0	0	0	0	0	0	0	0	0	0	0	0	0	0	0	0	0	0	0	0	0
Mn	none	none	SiO2	74.985	0.4	0.1	0.5	4	1.1	3_Literature	0	0	0	0	0	0	0	0	0	0	0	0	0	0	0	0	0	0	0	0	0	0	0	0	0	0	0	0	0	0	0	0	0	0	0	0	0	0	0
Na	W	Mn	SiO2	74.985	0.4	0.1	0.5	4	4.1	3_Literature	0	0	0	0	0	0	0	0	0	0	0	0	0	0	0	0	0	0	0	0	0	0	0	0	0	0	0	0	0	0	0	0	0	0	0	0	0	0	0
W	none	none	MgO	74.985	0.4	0.1	0.5	4	0.4	3_Literature	0	0	0	0	0	0	0	0	0	0	0	0	0	0	0	0	0	0	0	0	0	0	0	0	0	0	0	0	0	0	0	0	0	0	0	0	0	0	0
Na	W	none	MgO	74.985	0.4	0.1	0.5	4	1.4	3_Literature	0	0	0	0	0	0	0	0	0	0	0	0	0	0	0	0	0	0	0	0	0	0	0	0	0	0	0	0	0	0	0	0	0	0	0	0	0	0	0
Mn	none	none	MgO	74.985	0.4	0.1	0.5	4	0.4	3_Literature	0	0	0	0	0	0	0	0	0	0	0	0	0	0	0	0	0	0	0	0	0	0	0	0	0	0	0	0	0	0	0	0	0	0	0	0	0	0	0
Na	W	Mn	MgO	74.985	0.4	0.1	0.5	4	1	3_Literature	0	0	0	0	0	0	0	0	0	0	0	0	0	0	0	0	0	0	0	0	0	0	0	0	0	0	0	0	0	0	0	0	0	0	0	0	0	0	0
W	none	none	Fe2O3	74.985	0.4	0.1	0.5	4	0.6	3_Literature	0	0	0	0	0	0	0	0	0	0	0	0	0	0	0	0	0	0	0	0	0	0	0	0	0	0	0	1	0	0	0	0	0	0	0	0	0	0	0
Na	W	none	Fe2O3	74.985	0.4	0.1	0.5	4	1.1	3_Literature	0	0	0	0	0	0	0	0	0	0	0	0	0	0	0	0	0	0	0	0	0	0	0	0	0	0	0	1	0	0	0	0	0	0	0	0	0	0	0
Mn	none	none	Fe2O3	74.985	0.4	0.1	0.5	4	1.5	3_Literature	0	0	0	0	0	0	0	0	0	0	0	0	0	0	0	0	0	0	0	0	0	0	0	0	0	0	0	1	0	0	0	0	0	0	0	0	0	0	0
Na	W	Mn	Fe2O3	74.985	0.4	0.1	0.5	4	1.5	3_Literature	0	0	0	0	0	0	0	0	0	0	0	0	0	0	0	0	0	0	0	0	0	0	0	0	0	0	0	1	0	0	0	0	0	0	0	0	0	0	0
W	none	none	Fe2O3	74.985	0.4	0.1	0.5	4	0.4	3_Literature	0	0	0	0	0	0	0	0	0	0	0	0	0	0	0	0	0	0	0	0	0	0	0	0	0	0	0	1	0	0	0	0	0	0	0	0	0	0	0
Na	W	none	Fe2O3	74.985	0.4	0.1	0.5	4	0.6	3_Literature	0	0	0	0	0	0	0	0	0	0	0	0	0	0	0	0	0	0	0	0	0	0	0	0	0	0	0	1	0	0	0	0	0	0	0	0	0	0	0
Mn	none	none	Fe2O3	74.985	0.4	0.1	0.5	4	0.8	3_Literature	0	0	0	0	0	0	0	0	0	0	0	0	0	0	0	0	0	0	0	0	0	0	0	0	0	0	0	1	0	0	0	0	0	0	0	0	0	0	0
Na	W	Mn	Fe2O3	74.985	0.4	0.1	0.5	4	1.3	3_Literature	0	0	0	0	0	0	0	0	0	0	0	0	0	0	0	0	0	0	0	0	0	0	0	0	0	0	0	1	0	0	0	0	0	0	0	0	0	0	0
W	none	none	SrO	74.985	0.4	0.1	0.5	4	2.5	3_Literature	0	0	0	0	0	0	0	0	0	0	0	0	0	0	0	0	0	0	0	0	0	0	0	0	0	0	0	0	0	0	0	0	0	0	0	0	0	0	0
Na	W	none	SrO	74.985	0.4	0.1	0.5	4	1.7	3_Literature	0	0	0	0	0	0	0	0	0	0	0	0	0	0	0	0	0	0	0	0	0	0	0	0	0	0	0	0	0	0	0	0	0	0	0	0	0	0	0
Mn	none	none	SrO	74.985	0.4	0.1	0.5	4	1.1	3_Literature	0	0	0	0	0	0	0	0	0	0	0	0	0	0	0	0	0	0	0	0	0	0	0	0	0	0	0	0	0	0	0	0	0	0	0	0	0	0	0
Na	W	Mn	SrO	74.985	0.4	0.1	0.5	4	1.2	3_Literature	0	0	0	0	0	0	0	0	0	0	0	0	0	0	0	0	0	0	0	0	0	0	0	0	0	0	0	0	0	0	0	0	0	0	0	0	0	0	0
W	none	none	TiO2	74.985	0.4	0.1	0.5	4	0.5	3_Literature	0	0	0	0	0	0	0	0	0	0	0	0	0	0	0	0	0	0	0	0	0	0	0	0	0	0	0	0	0	0	0	0	0	0	0	0	0	0	0
Na	W	none	TiO2	74.985	0.4	0.1	0.5	4	2.8	3_Literature	0	0	0	0	0	0	0	0	0	0	0	0	0	0	0	0	0	0	0	0	0	0	0	0	0	0	0	0	0	0	0	0	0	0	0	0	0	0	0
Mn	none	none	TiO2	74.985	0.4	0.1	0.5	4	1.6	3_Literature	0	0	0	0	0	0	0	0	0	0	0	0	0	0	0	0	0	0	0	0	0	0	0	0	0	0	0	0	0	0	0	0	0	0	0	0	0	0	0
Na	W	Mn	TiO2	74.985	0.4	0.1	0.5	4	3.2	3_Literature	0	0	0	0	0	0	0	0	0	0	0	0	0	0	0	0	0	0	0	0	0	0	0	0	0	0	0	0	0	0	0	0	0	0	0	0	0	0	0
W	none	none	TiO2	74.985	0.4	0.1	0.5	4	0.7	3_Literature	0	0	0	0	0	0	0	0	0	0	0	0	0	0	0	0	0	0	0	0	0	0	0	0	0	0	0	0	0	0	0	0	0	0	0	0	0	0	0
Na	W	none	TiO2	74.985	0.4	0.1	0.5	4	1.1	3_Literature	0	0	0	0	0	0	0	0	0	0	0	0	0	0	0	0	0	0	0	0	0	0	0	0	0	0	0	0	0	0	0	0	0	0	0	0	0	0	0
Mn	none	none	TiO2	74.985	0.4	0.1	0.5	4	1.5	3_Literature	0	0	0	0	0	0	0	0	0	0	0	0	0	0	0	0	0	0	0	0	0	0	0	0	0	0	0	0	0	0	0	0	0	0	0	0	0	0	0
Na	W	Mn	TiO2	74.985	0.4	0.1	0.5	4	1.6	3_Literature	0	0	0	0	0	0	0	0	0	0	0	0	0	0	0	0	0	0	0	0	0	0	0	0	0	0	0	0	0	0	0	0	0	0	0	0	0	0	0
none	W	none	Na2O	74.985	0.4	0.1	0.5	4	1.5	3_Literature	0	0	0	0	0	0	0	0	0	0	0	0	0	0	0	0	0	0	0	0	0	0	0	0	0	0	0	0	0	0	0	0	0	0	0	0	0	0	0
Na	W	Mn	SiO2	74.985	0.4	0.1	0.5	4	2.3	3_Literature	0	0	0	0	0	0	0	0	0	0	0	0	0	0	0	0	0	0	0	0	0	0	0	0	0	0	0	0	0	0	0	0	0	0	0	0	0	0	0
Na	W	Mn	SiO2	82.485	0.4	0.1	0.5	2.5	19.1	3_Literature	0	0	0	0	0	0	0	0	0	0	0	0	0	0	0	0	0	0	0	0	0	0	0	0	0	0	0	0	0	0	0	0	0	0	0	0	0	0	0
Na	W	Mn	SiO2	82.485	0.4	0.1	0.5	2.5	20.6	3_Literature	0	0	0	0	0	0	0	0	0	0	0	0	0	0	0	0	0	0	0	0	0	0	0	0	0	0	0	0	0	0	0	0	0	0	0	0	0	0	0
Na	W	Mn	SiO2	82.485	0.4	0.1	0.5	3	16	3_Literature	0	0	0	0	0	0	0	0	0	0	0	0	0	0	0	0	0	0	0	0	0	0	0	0	0	0	0	0	0	0	0	0	0	0	0	0	0	0	0
none	none	none	La2O3	74.985	0.4	0.1	0.5	4	9.2	3_Literature	0	0	0	0	0	0	0	0	0	0	0	0	0	0	0	0	0	0	0	0	0	0	0	0	0	0	0	0	0	0	0	0	0	0	0	0	1	0	0
none	none	none	CaO	74.985	0.4	0.1	0.5	4	3.4	3_Literature	0	0	0	0	0	0	0	0	0	0	0	0	0	1	0	0	0	0	0	0	0	0	0	0	0	0	0	0	0	0	0	0	0	0	0	0	0	0	0
none	none	none	Al2O3	74.985	0.4	0.1	0.5	4	0.5	3_Literature	0	0	1	0	0	0	0	0	0	0	0	0	0	0	0	0	0	0	0	0	0	0	0	0	0	0	0	0	0	0	0	0	0	0	0	0	0	0	0
none	none	none	ZrO2	74.985	0.4	0.1	0.5	4	2.4	3_Literature	0	0	0	0	0	0	0	0	0	0	0	0	0	0	0	0	0	0	0	0	0	0	0	0	0	0	0	0	0	0	0	0	0	0	0	0	0	0	0
none	none	none	SiO2	74.985	0.4	0.1	0.5	4	0.7	3_Literature	0	0	0	0	0	0	0	0	0	0	0	0	0	0	0	0	0	0	0	0	0	0	0	0	0	0	0	0	0	0	0	0	0	0	0	0	0	0	0
none	none	none	MgO	74.985	0.4	0.1	0.5	4	2.7	3_Literature	0	0	0	0	0	0	0	0	0	0	0	0	0	0	0	0	0	0	0	0	0	0	0	0	0	0	0	0	0	0	0	0	0	0	0	0	0	0	0
none	none	none	Fe2O3	74.985	0.4	0.1	0.5	4	0.3	3_Literature	0	0	0	0	0	0	0	0	0	0	0	0	0	0	0	0	0	0	0	0	0	0	0	0	0	0	0	1	0	0	0	0	0	0	0	0	0	0	0
none	none	none	Fe2O3	74.985	0.4	0.1	0.5	4	0.4	3_Literature	0	0	0	0	0	0	0	0	0	0	0	0	0	0	0	0	0	0	0	0	0	0	0	0	0	0	0	1	0	0	0	0	0	0	0	0	0	0	0
none	none	none	SrO	74.985	0.4	0.1	0.5	4	1	3_Literature	0	0	0	0	0	0	0	0	0	0	0	0	0	0	0	0	0	0	0	0	0	0	0	0	0	0	0	0	0	0	0	0	0	0	0	0	0	0	0
none	none	none	TiO2	74.985	0.4	0.1	0.5	4	0.9	3_Literature	0	0	0	0	0	0	0	0	0	0	0	0	0	0	0	0	0	0	0	0	0	0	0	0	0	0	0	0	0	0	0	0	0	0	0	0	0	0	0
none	none	none	TiO2	74.985	0.4	0.1	0.5	4	0.6	3_Literature	0	0	0	0	0	0	0	0	0	0	0	0	0	0	0	0	0	0	0	0	0	0	0	0	0	0	0	0	0	0	0	0	0	0	0	0	0	0	0
Li	none	none	MgO	69.985	0.95	0.05	0	19	2	3_Literature	0	0	0	0	0	0	0	0	0	0	0	0	0	0	0	0	0	0	0	0	0	0	0	0	0	0	0	0	0	0	0	0	0	0	0	0	0	1	0
Li	none	none	MgO	69.985	0.4	0.2	0.4	2	12.5	3_Literature	0	0	0	0	0	0	0	0	0	0	0	0	0	0	0	0	0	0	0	0	0	0	0	0	0	0	0	0	0	0	0	0	0	0	0	0	0	1	0
Li	none	none	MgO	72.485	0.4	0.2	0.4	2	12.9	3_Literature	0	0	0	0	0	0	0	0	0	0	0	0	0	0	0	0	0	0	0	0	0	0	0	0	0	0	0	0	0	0	0	0	0	0	0	0	0	1	0
Li	none	none	MgO	74.985	0.4	0.2	0.4	2	14.9	3_Literature	0	0	0	0	0	0	0	0	0	0	0	0	0	0	0	0	0	0	0	0	0	0	0	0	0	0	0	0	0	0	0	0	0	0	0	0	0	1	0
Li	none	none	MgO	77.485	0.4	0.2	0.4	2	16	3_Literature	0	0	0	0	0	0	0	0	0	0	0	0	0	0	0	0	0	0	0	0	0	0	0	0	0	0	0	0	0	0	0	0	0	0	0	0	0	1	0
Li	none	none	MgO	79.985	0.4	0.2	0.4	2	13.4	3_Literature	0	0	0	0	0	0	0	0	0	0	0	0	0	0	0	0	0	0	0	0	0	0	0	0	0	0	0	0	0	0	0	0	0	0	0	0	0	1	0
Li	none	none	MgO	82.485	0.4	0.2	0.4	2	8.1	3_Literature	0	0	0	0	0	0	0	0	0	0	0	0	0	0	0	0	0	0	0	0	0	0	0	0	0	0	0	0	0	0	0	0	0	0	0	0	0	1	0
Li	none	none	MgO	84.985	0.4	0.2	0.4	2	5.2	3_Literature	0	0	0	0	0	0	0	0	0	0	0	0	0	0	0	0	0	0	0	0	0	0	0	0	0	0	0	0	0	0	0	0	0	0	0	0	0	1	0
Ca	none	none	ZnO	67.485	0.4	0.2	0.4	2	0.8	3_Literature	0	0	0	0	0	0	0	0	0	0	0	0	1	0	0	0	0	0	0	0	0	0	0	0	0	0	0	0	0	0	0	0	0	0	0	0	0	0	0
Ca	none	none	ZnO	69.985	0.4	0.2	0.4	2	2.1	3_Literature	0	0	0	0	0	0	0	0	0	0	0	0	1	0	0	0	0	0	0	0	0	0	0	0	0	0	0	0	0	0	0	0	0	0	0	0	0	0	0
Ca	none	none	ZnO	72.485	0.4	0.2	0.4	2	3.1	3_Literature	0	0	0	0	0	0	0	0	0	0	0	0	1	0	0	0	0	0	0	0	0	0	0	0	0	0	0	0	0	0	0	0	0	0	0	0	0	0	0
Ca	none	none	ZnO	74.985	0.4	0.2	0.4	2	8.6	3_Literature	0	0	0	0	0	0	0	0	0	0	0	0	1	0	0	0	0	0	0	0	0	0	0	0	0	0	0	0	0	0	0	0	0	0	0	0	0	0	0
Ca	none	none	ZnO	77.485	0.4	0.2	0.4	2	10.2	3_Literature	0	0	0	0	0	0	0	0	0	0	0	0	1	0	0	0	0	0	0	0	0	0	0	0	0	0	0	0	0	0	0	0	0	0	0	0	0	0	0
Ca	none	none	ZnO	79.985	0.4	0.2	0.4	2	10.8	3_Literature	0	0	0	0	0	0	0	0	0	0	0	0	1	0	0	0	0	0	0	0	0	0	0	0	0	0	0	0	0	0	0	0	0	0	0	0	0	0	0
Ca	none	none	ZnO	82.485	0.4	0.2	0.4	2	6.6	3_Literature	0	0	0	0	0	0	0	0	0	0	0	0	1	0	0	0	0	0	0	0	0	0	0	0	0	0	0	0	0	0	0	0	0	0	0	0	0	0	0
Ca	none	none	ZnO	67.485	0.4	0.2	0.4	2	14.3	3_Literature	0	0	0	0	0	0	0	0	0	0	0	0	1	0	0	0	0	0	0	0	0	0	0	0	0	0	0	0	0	0	0	0	0	0	0	0	0	0	0
Ca	none	none	ZnO	69.985	0.4	0.2	0.4	2	15	3_Literature	0	0	0	0	0	0	0	0	0	0	0	0	1	0	0	0	0	0	0	0	0	0	0	0	0	0	0	0	0	0	0	0	0	0	0	0	0	0	0
Ca	none	none	ZnO	72.485	0.4	0.2	0.4	2	15	3_Literature	0	0	0	0	0	0	0	0	0	0	0	0	1	0	0	0	0	0	0	0	0	0	0	0	0	0	0	0	0	0	0	0	0	0	0	0	0	0	0
Ca	none	none	ZnO	74.985	0.4	0.2	0.4	2	15.4	3_Literature	0	0	0	0	0	0	0	0	0	0	0	0	1	0	0	0	0	0	0	0	0	0	0	0	0	0	0	0	0	0	0	0	0	0	0	0	0	0	0
Ca	none	none	ZnO	77.485	0.4	0.2	0.4	2	7.9	3_Literature	0	0	0	0	0	0	0	0	0	0	0	0	1	0	0	0	0	0	0	0	0	0	0	0	0	0	0	0	0	0	0	0	0	0	0	0	0	0	0
Ca	none	none	ZnO	79.985	0.4	0.2	0.4	2	7.3	3_Literature	0	0	0	0	0	0	0	0	0	0	0	0	1	0	0	0	0	0	0	0	0	0	0	0	0	0	0	0	0	0	0	0	0	0	0	0	0	0	0
Ca	none	none	ZnO	82.485	0.4	0.2	0.4	2	7.1	3_Literature	0	0	0	0	0	0	0	0	0	0	0	0	1	0	0	0	0	0	0	0	0	0	0	0	0	0	0	0	0	0	0	0	0	0	0	0	0	0	0
Sr	none	none	La2O3	39.985	0.75	0.25	0	3	0	3_Literature	0	0	0	0	0	0	0	0	0	0	0	0	0	0	0	0	0	0	0	0	0	0	0	0	0	0	0	0	0	0	0	0	0	0	0	0	1	0	0
Sr	none	none	La2O3	44.985	0.75	0.25	0	3	0	3_Literature	0	0	0	0	0	0	0	0	0	0	0	0	0	0	0	0	0	0	0	0	0	0	0	0	0	0	0	0	0	0	0	0	0	0	0	0	1	0	0
Sr	none	none	La2O3	47.485	0.75	0.25	0	3	0	3_Literature	0	0	0	0	0	0	0	0	0	0	0	0	0	0	0	0	0	0	0	0	0	0	0	0	0	0	0	0	0	0	0	0	0	0	0	0	1	0	0
Sr	none	none	La2O3	49.985	0.75	0.25	0	3	16	3_Literature	0	0	0	0	0	0	0	0	0	0	0	0	0	0	0	0	0	0	0	0	0	0	0	0	0	0	0	0	0	0	0	0	0	0	0	0	1	0	0
Sr	none	none	La2O3	54.985	0.75	0.25	0	3	17.1	3_Literature	0	0	0	0	0	0	0	0	0	0	0	0	0	0	0	0	0	0	0	0	0	0	0	0	0	0	0	0	0	0	0	0	0	0	0	0	1	0	0
Sr	none	none	La2O3	59.985	0.75	0.25	0	3	17	3_Literature	0	0	0	0	0	0	0	0	0	0	0	0	0	0	0	0	0	0	0	0	0	0	0	0	0	0	0	0	0	0	0	0	0	0	0	0	1	0	0
Sr	none	none	La2O3	64.985	0.75	0.25	0	3	17.1	3_Literature	0	0	0	0	0	0	0	0	0	0	0	0	0	0	0	0	0	0	0	0	0	0	0	0	0	0	0	0	0	0	0	0	0	0	0	0	1	0	0
Sr	none	none	La2O3	69.985	0.75	0.25	0	3	16.6	3_Literature	0	0	0	0	0	0	0	0	0	0	0	0	0	0	0	0	0	0	0	0	0	0	0	0	0	0	0	0	0	0	0	0	0	0	0	0	1	0	0
Sr	none	none	La2O3	74.985	0.75	0.25	0	3	15.7	3_Literature	0	0	0	0	0	0	0	0	0	0	0	0	0	0	0	0	0	0	0	0	0	0	0	0	0	0	0	0	0	0	0	0	0	0	0	0	1	0	0
Sr	none	none	La2O3	79.985	0.75	0.25	0	3	14.8	3_Literature	0	0	0	0	0	0	0	0	0	0	0	0	0	0	0	0	0	0	0	0	0	0	0	0	0	0	0	0	0	0	0	0	0	0	0	0	1	0	0
Sr	none	none	La2O3	39.985	0.75	0.25	0	3	0	3_Literature	0	0	0	0	0	0	0	0	0	0	0	0	0	0	0	0	0	0	0	0	0	0	0	0	0	0	0	0	0	0	0	0	0	0	0	0	1	0	0
Sr	none	none	La2O3	44.985	0.75	0.25	0	3	0	3_Literature	0	0	0	0	0	0	0	0	0	0	0	0	0	0	0	0	0	0	0	0	0	0	0	0	0	0	0	0	0	0	0	0	0	0	0	0	1	0	0
Sr	none	none	La2O3	47.485	0.75	0.25	0	3	0	3_Literature	0	0	0	0	0	0	0	0	0	0	0	0	0	0	0	0	0	0	0	0	0	0	0	0	0	0	0	0	0	0	0	0	0	0	0	0	1	0	0
Sr	none	none	La2O3	49.985	0.75	0.25	0	3	16.8	3_Literature	0	0	0	0	0	0	0	0	0	0	0	0	0	0	0	0	0	0	0	0	0	0	0	0	0	0	0	0	0	0	0	0	0	0	0	0	1	0	0
Sr	none	none	La2O3	54.985	0.75	0.25	0	3	17.5	3_Literature	0	0	0	0	0	0	0	0	0	0	0	0	0	0	0	0	0	0	0	0	0	0	0	0	0	0	0	0	0	0	0	0	0	0	0	0	1	0	0
Sr	none	none	La2O3	59.985	0.75	0.25	0	3	18.4	3_Literature	0	0	0	0	0	0	0	0	0	0	0	0	0	0	0	0	0	0	0	0	0	0	0	0	0	0	0	0	0	0	0	0	0	0	0	0	1	0	0
Sr	none	none	La2O3	64.985	0.75	0.25	0	3	19.1	3_Literature	0	0	0	0	0	0	0	0	0	0	0	0	0	0	0	0	0	0	0	0	0	0	0	0	0	0	0	0	0	0	0	0	0	0	0	0	1	0	0
Sr	none	none	La2O3	69.985	0.75	0.25	0	3	18.5	3_Literature	0	0	0	0	0	0	0	0	0	0	0	0	0	0	0	0	0	0	0	0	0	0	0	0	0	0	0	0	0	0	0	0	0	0	0	0	1	0	0
Sr	none	none	La2O3	74.985	0.75	0.25	0	3	18.4	3_Literature	0	0	0	0	0	0	0	0	0	0	0	0	0	0	0	0	0	0	0	0	0	0	0	0	0	0	0	0	0	0	0	0	0	0	0	0	1	0	0
Sr	none	none	La2O3	79.985	0.75	0.25	0	3	17.7	3_Literature	0	0	0	0	0	0	0	0	0	0	0	0	0	0	0	0	0	0	0	0	0	0	0	0	0	0	0	0	0	0	0	0	0	0	0	0	1	0	0
Sr	none	none	La2O3	39.985	0.75	0.25	0	3	0	3_Literature	0	0	0	0	0	0	0	0	0	0	0	0	0	0	0	0	0	0	0	0	0	0	0	0	0	0	0	0	0	0	0	0	0	0	0	0	1	0	0
Sr	none	none	La2O3	44.985	0.75	0.25	0	3	0	3_Literature	0	0	0	0	0	0	0	0	0	0	0	0	0	0	0	0	0	0	0	0	0	0	0	0	0	0	0	0	0	0	0	0	0	0	0	0	1	0	0
Sr	none	none	La2O3	47.485	0.75	0.25	0	3	0	3_Literature	0	0	0	0	0	0	0	0	0	0	0	0	0	0	0	0	0	0	0	0	0	0	0	0	0	0	0	0	0	0	0	0	0	0	0	0	1	0	0
Sr	none	none	La2O3	49.985	0.75	0.25	0	3	16.5	3_Literature	0	0	0	0	0	0	0	0	0	0	0	0	0	0	0	0	0	0	0	0	0	0	0	0	0	0	0	0	0	0	0	0	0	0	0	0	1	0	0
Sr	none	none	La2O3	54.985	0.75	0.25	0	3	18.1	3_Literature	0	0	0	0	0	0	0	0	0	0	0	0	0	0	0	0	0	0	0	0	0	0	0	0	0	0	0	0	0	0	0	0	0	0	0	0	1	0	0
Sr	none	none	La2O3	59.985	0.75	0.25	0	3	19.2	3_Literature	0	0	0	0	0	0	0	0	0	0	0	0	0	0	0	0	0	0	0	0	0	0	0	0	0	0	0	0	0	0	0	0	0	0	0	0	1	0	0
Sr	none	none	La2O3	64.985	0.75	0.25	0	3	19.3	3_Literature	0	0	0	0	0	0	0	0	0	0	0	0	0	0	0	0	0	0	0	0	0	0	0	0	0	0	0	0	0	0	0	0	0	0	0	0	1	0	0
Sr	none	none	La2O3	69.985	0.75	0.25	0	3	19.6	3_Literature	0	0	0	0	0	0	0	0	0	0	0	0	0	0	0	0	0	0	0	0	0	0	0	0	0	0	0	0	0	0	0	0	0	0	0	0	1	0	0
Sr	none	none	La2O3	74.985	0.75	0.25	0	3	19.4	3_Literature	0	0	0	0	0	0	0	0	0	0	0	0	0	0	0	0	0	0	0	0	0	0	0	0	0	0	0	0	0	0	0	0	0	0	0	0	1	0	0
Sr	none	none	La2O3	79.985	0.75	0.25	0	3	19.4	3_Literature	0	0	0	0	0	0	0	0	0	0	0	0	0	0	0	0	0	0	0	0	0	0	0	0	0	0	0	0	0	0	0	0	0	0	0	0	1	0	0
Sr	none	none	La2O3	39.985	0.75	0.25	0	3	0	3_Literature	0	0	0	0	0	0	0	0	0	0	0	0	0	0	0	0	0	0	0	0	0	0	0	0	0	0	0	0	0	0	0	0	0	0	0	0	1	0	0
Sr	none	none	La2O3	44.985	0.75	0.25	0	3	0	3_Literature	0	0	0	0	0	0	0	0	0	0	0	0	0	0	0	0	0	0	0	0	0	0	0	0	0	0	0	0	0	0	0	0	0	0	0	0	1	0	0
Sr	none	none	La2O3	47.485	0.75	0.25	0	3	0	3_Literature	0	0	0	0	0	0	0	0	0	0	0	0	0	0	0	0	0	0	0	0	0	0	0	0	0	0	0	0	0	0	0	0	0	0	0	0	1	0	0
Sr	none	none	La2O3	49.985	0.75	0.25	0	3	17	3_Literature	0	0	0	0	0	0	0	0	0	0	0	0	0	0	0	0	0	0	0	0	0	0	0	0	0	0	0	0	0	0	0	0	0	0	0	0	1	0	0
Sr	none	none	La2O3	54.985	0.75	0.25	0	3	19	3_Literature	0	0	0	0	0	0	0	0	0	0	0	0	0	0	0	0	0	0	0	0	0	0	0	0	0	0	0	0	0	0	0	0	0	0	0	0	1	0	0
Sr	none	none	La2O3	59.985	0.75	0.25	0	3	19.5	3_Literature	0	0	0	0	0	0	0	0	0	0	0	0	0	0	0	0	0	0	0	0	0	0	0	0	0	0	0	0	0	0	0	0	0	0	0	0	1	0	0
Sr	none	none	La2O3	64.985	0.75	0.25	0	3	20.5	3_Literature	0	0	0	0	0	0	0	0	0	0	0	0	0	0	0	0	0	0	0	0	0	0	0	0	0	0	0	0	0	0	0	0	0	0	0	0	1	0	0
Sr	none	none	La2O3	69.985	0.75	0.25	0	3	20.4	3_Literature	0	0	0	0	0	0	0	0	0	0	0	0	0	0	0	0	0	0	0	0	0	0	0	0	0	0	0	0	0	0	0	0	0	0	0	0	1	0	0
Sr	none	none	La2O3	74.985	0.75	0.25	0	3	19.2	3_Literature	0	0	0	0	0	0	0	0	0	0	0	0	0	0	0	0	0	0	0	0	0	0	0	0	0	0	0	0	0	0	0	0	0	0	0	0	1	0	0
Sr	none	none	La2O3	79.985	0.75	0.25	0	3	18.5	3_Literature	0	0	0	0	0	0	0	0	0	0	0	0	0	0	0	0	0	0	0	0	0	0	0	0	0	0	0	0	0	0	0	0	0	0	0	0	1	0	0
Sr	none	none	La2O3	39.985	0.75	0.25	0	3	0	3_Literature	0	0	0	0	0	0	0	0	0	0	0	0	0	0	0	0	0	0	0	0	0	0	0	0	0	0	0	0	0	0	0	0	0	0	0	0	1	0	0
Sr	none	none	La2O3	44.985	0.75	0.25	0	3	0	3_Literature	0	0	0	0	0	0	0	0	0	0	0	0	0	0	0	0	0	0	0	0	0	0	0	0	0	0	0	0	0	0	0	0	0	0	0	0	1	0	0
Sr	none	none	La2O3	47.485	0.75	0.25	0	3	0	3_Literature	0	0	0	0	0	0	0	0	0	0	0	0	0	0	0	0	0	0	0	0	0	0	0	0	0	0	0	0	0	0	0	0	0	0	0	0	1	0	0
Sr	none	none	La2O3	49.985	0.75	0.25	0	3	0	3_Literature	0	0	0	0	0	0	0	0	0	0	0	0	0	0	0	0	0	0	0	0	0	0	0	0	0	0	0	0	0	0	0	0	0	0	0	0	1	0	0
Sr	none	none	La2O3	54.985	0.75	0.25	0	3	16.6	3_Literature	0	0	0	0	0	0	0	0	0	0	0	0	0	0	0	0	0	0	0	0	0	0	0	0	0	0	0	0	0	0	0	0	0	0	0	0	1	0	0
Sr	none	none	La2O3	59.985	0.75	0.25	0	3	19.1	3_Literature	0	0	0	0	0	0	0	0	0	0	0	0	0	0	0	0	0	0	0	0	0	0	0	0	0	0	0	0	0	0	0	0	0	0	0	0	1	0	0
Sr	none	none	La2O3	64.985	0.75	0.25	0	3	19.9	3_Literature	0	0	0	0	0	0	0	0	0	0	0	0	0	0	0	0	0	0	0	0	0	0	0	0	0	0	0	0	0	0	0	0	0	0	0	0	1	0	0
Sr	none	none	La2O3	69.985	0.75	0.25	0	3	19.7	3_Literature	0	0	0	0	0	0	0	0	0	0	0	0	0	0	0	0	0	0	0	0	0	0	0	0	0	0	0	0	0	0	0	0	0	0	0	0	1	0	0
Sr	none	none	La2O3	74.985	0.75	0.25	0	3	19.3	3_Literature	0	0	0	0	0	0	0	0	0	0	0	0	0	0	0	0	0	0	0	0	0	0	0	0	0	0	0	0	0	0	0	0	0	0	0	0	1	0	0
Sr	none	none	La2O3	79.985	0.75	0.25	0	3	19.5	3_Literature	0	0	0	0	0	0	0	0	0	0	0	0	0	0	0	0	0	0	0	0	0	0	0	0	0	0	0	0	0	0	0	0	0	0	0	0	1	0	0
K	none	none	La2O3	39.985	0.75	0.25	0	3	0.2	3_Literature	0	0	0	0	0	0	0	0	0	0	0	0	0	0	0	0	0	0	0	0	0	0	0	0	0	0	0	0	0	0	0	0	0	1	0	0	1	0	0
K	none	none	La2O3	44.985	0.75	0.25	0	3	0	3_Literature	0	0	0	0	0	0	0	0	0	0	0	0	0	0	0	0	0	0	0	0	0	0	0	0	0	0	0	0	0	0	0	0	0	1	0	0	1	0	0
K	none	none	La2O3	49.985	0.75	0.25	0	3	0.1	3_Literature	0	0	0	0	0	0	0	0	0	0	0	0	0	0	0	0	0	0	0	0	0	0	0	0	0	0	0	0	0	0	0	0	0	1	0	0	1	0	0
K	none	none	La2O3	54.985	0.75	0.25	0	3	0.1	3_Literature	0	0	0	0	0	0	0	0	0	0	0	0	0	0	0	0	0	0	0	0	0	0	0	0	0	0	0	0	0	0	0	0	0	1	0	0	1	0	0
K	none	none	La2O3	59.985	0.75	0.25	0	3	15.5	3_Literature	0	0	0	0	0	0	0	0	0	0	0	0	0	0	0	0	0	0	0	0	0	0	0	0	0	0	0	0	0	0	0	0	0	1	0	0	1	0	0
K	none	none	La2O3	64.985	0.75	0.25	0	3	15.4	3_Literature	0	0	0	0	0	0	0	0	0	0	0	0	0	0	0	0	0	0	0	0	0	0	0	0	0	0	0	0	0	0	0	0	0	1	0	0	1	0	0
K	none	none	La2O3	69.985	0.75	0.25	0	3	14.8	3_Literature	0	0	0	0	0	0	0	0	0	0	0	0	0	0	0	0	0	0	0	0	0	0	0	0	0	0	0	0	0	0	0	0	0	1	0	0	1	0	0
K	none	none	La2O3	74.985	0.75	0.25	0	3	13.7	3_Literature	0	0	0	0	0	0	0	0	0	0	0	0	0	0	0	0	0	0	0	0	0	0	0	0	0	0	0	0	0	0	0	0	0	1	0	0	1	0	0
K	none	none	La2O3	79.985	0.75	0.25	0	3	12.5	3_Literature	0	0	0	0	0	0	0	0	0	0	0	0	0	0	0	0	0	0	0	0	0	0	0	0	0	0	0	0	0	0	0	0	0	1	0	0	1	0	0
Ba	none	none	La2O3	39.985	0.75	0.25	0	3	0.2	3_Literature	0	0	0	0	0	0	1	0	0	0	0	0	0	0	0	0	0	0	0	0	0	0	0	0	0	0	0	0	0	0	0	0	0	0	0	0	1	0	0
Ba	none	none	La2O3	44.985	0.75	0.25	0	3	0.4	3_Literature	0	0	0	0	0	0	1	0	0	0	0	0	0	0	0	0	0	0	0	0	0	0	0	0	0	0	0	0	0	0	0	0	0	0	0	0	1	0	0
Ba	none	none	La2O3	49.985	0.75	0.25	0	3	16.9	3_Literature	0	0	0	0	0	0	1	0	0	0	0	0	0	0	0	0	0	0	0	0	0	0	0	0	0	0	0	0	0	0	0	0	0	0	0	0	1	0	0
Ba	none	none	La2O3	54.985	0.75	0.25	0	3	17.3	3_Literature	0	0	0	0	0	0	1	0	0	0	0	0	0	0	0	0	0	0	0	0	0	0	0	0	0	0	0	0	0	0	0	0	0	0	0	0	1	0	0
Ba	none	none	La2O3	59.985	0.75	0.25	0	3	17.9	3_Literature	0	0	0	0	0	0	1	0	0	0	0	0	0	0	0	0	0	0	0	0	0	0	0	0	0	0	0	0	0	0	0	0	0	0	0	0	1	0	0
Ba	none	none	La2O3	64.985	0.75	0.25	0	3	17.3	3_Literature	0	0	0	0	0	0	1	0	0	0	0	0	0	0	0	0	0	0	0	0	0	0	0	0	0	0	0	0	0	0	0	0	0	0	0	0	1	0	0
Ba	none	none	La2O3	69.985	0.75	0.25	0	3	16.4	3_Literature	0	0	0	0	0	0	1	0	0	0	0	0	0	0	0	0	0	0	0	0	0	0	0	0	0	0	0	0	0	0	0	0	0	0	0	0	1	0	0
Ba	none	none	La2O3	74.985	0.75	0.25	0	3	16.3	3_Literature	0	0	0	0	0	0	1	0	0	0	0	0	0	0	0	0	0	0	0	0	0	0	0	0	0	0	0	0	0	0	0	0	0	0	0	0	1	0	0
Ba	none	none	La2O3	79.985	0.75	0.25	0	3	15.4	3_Literature	0	0	0	0	0	0	1	0	0	0	0	0	0	0	0	0	0	0	0	0	0	0	0	0	0	0	0	0	0	0	0	0	0	0	0	0	1	0	0
Ca	none	none	La2O3	39.985	0.75	0.25	0	3	0.1	3_Literature	0	0	0	0	0	0	0	0	0	0	0	0	1	0	0	0	0	0	0	0	0	0	0	0	0	0	0	0	0	0	0	0	0	0	0	0	1	0	0
Ca	none	none	La2O3	44.985	0.75	0.25	0	3	0.2	3_Literature	0	0	0	0	0	0	0	0	0	0	0	0	1	0	0	0	0	0	0	0	0	0	0	0	0	0	0	0	0	0	0	0	0	0	0	0	1	0	0
Ca	none	none	La2O3	49.985	0.75	0.25	0	3	0.2	3_Literature	0	0	0	0	0	0	0	0	0	0	0	0	1	0	0	0	0	0	0	0	0	0	0	0	0	0	0	0	0	0	0	0	0	0	0	0	1	0	0
Ca	none	none	La2O3	54.985	0.75	0.25	0	3	17.1	3_Literature	0	0	0	0	0	0	0	0	0	0	0	0	1	0	0	0	0	0	0	0	0	0	0	0	0	0	0	0	0	0	0	0	0	0	0	0	1	0	0
Ca	none	none	La2O3	59.985	0.75	0.25	0	3	17.4	3_Literature	0	0	0	0	0	0	0	0	0	0	0	0	1	0	0	0	0	0	0	0	0	0	0	0	0	0	0	0	0	0	0	0	0	0	0	0	1	0	0
Ca	none	none	La2O3	64.985	0.75	0.25	0	3	17.4	3_Literature	0	0	0	0	0	0	0	0	0	0	0	0	1	0	0	0	0	0	0	0	0	0	0	0	0	0	0	0	0	0	0	0	0	0	0	0	1	0	0
Ca	none	none	La2O3	69.985	0.75	0.25	0	3	16.2	3_Literature	0	0	0	0	0	0	0	0	0	0	0	0	1	0	0	0	0	0	0	0	0	0	0	0	0	0	0	0	0	0	0	0	0	0	0	0	1	0	0
Ca	none	none	La2O3	74.985	0.75	0.25	0	3	15.5	3_Literature	0	0	0	0	0	0	0	0	0	0	0	0	1	0	0	0	0	0	0	0	0	0	0	0	0	0	0	0	0	0	0	0	0	0	0	0	1	0	0
Ca	none	none	La2O3	79.985	0.75	0.25	0	3	14.2	3_Literature	0	0	0	0	0	0	0	0	0	0	0	0	1	0	0	0	0	0	0	0	0	0	0	0	0	0	0	0	0	0	0	0	0	0	0	0	1	0	0
none	none	none	La2O3	39.985	0.75	0.25	0	3	0	3_Literature	0	0	0	0	0	0	0	0	0	0	0	0	0	0	0	0	0	0	0	0	0	0	0	0	0	0	0	0	0	0	0	0	0	0	0	0	1	0	0
none	none	none	La2O3	44.985	0.75	0.25	0	3	0	3_Literature	0	0	0	0	0	0	0	0	0	0	0	0	0	0	0	0	0	0	0	0	0	0	0	0	0	0	0	0	0	0	0	0	0	0	0	0	1	0	0
none	none	none	La2O3	47.485	0.75	0.25	0	3	16	3_Literature	0	0	0	0	0	0	0	0	0	0	0	0	0	0	0	0	0	0	0	0	0	0	0	0	0	0	0	0	0	0	0	0	0	0	0	0	1	0	0
none	none	none	La2O3	49.985	0.75	0.25	0	3	16.6	3_Literature	0	0	0	0	0	0	0	0	0	0	0	0	0	0	0	0	0	0	0	0	0	0	0	0	0	0	0	0	0	0	0	0	0	0	0	0	1	0	0
none	none	none	La2O3	54.985	0.75	0.25	0	3	16.9	3_Literature	0	0	0	0	0	0	0	0	0	0	0	0	0	0	0	0	0	0	0	0	0	0	0	0	0	0	0	0	0	0	0	0	0	0	0	0	1	0	0
none	none	none	La2O3	59.985	0.75	0.25	0	3	17.1	3_Literature	0	0	0	0	0	0	0	0	0	0	0	0	0	0	0	0	0	0	0	0	0	0	0	0	0	0	0	0	0	0	0	0	0	0	0	0	1	0	0
none	none	none	La2O3	64.985	0.75	0.25	0	3	16.6	3_Literature	0	0	0	0	0	0	0	0	0	0	0	0	0	0	0	0	0	0	0	0	0	0	0	0	0	0	0	0	0	0	0	0	0	0	0	0	1	0	0
none	none	none	La2O3	69.985	0.75	0.25	0	3	15.9	3_Literature	0	0	0	0	0	0	0	0	0	0	0	0	0	0	0	0	0	0	0	0	0	0	0	0	0	0	0	0	0	0	0	0	0	0	0	0	1	0	0
none	none	none	La2O3	74.985	0.75	0.25	0	3	15.1	3_Literature	0	0	0	0	0	0	0	0	0	0	0	0	0	0	0	0	0	0	0	0	0	0	0	0	0	0	0	0	0	0	0	0	0	0	0	0	1	0	0
none	none	none	La2O3	79.985	0.75	0.25	0	3	13.9	3_Literature	0	0	0	0	0	0	0	0	0	0	0	0	0	0	0	0	0	0	0	0	0	0	0	0	0	0	0	0	0	0	0	0	0	0	0	0	1	0	0
none	none	none	MgO	74.985	0.6	0.2	0.2	3	0.2	3_Literature	0	0	0	0	0	0	0	0	0	0	0	0	0	0	0	0	0	0	0	0	0	0	0	0	0	0	0	0	0	0	0	0	0	0	0	0	0	0	0
none	none	none	MgO	74.985	0.6	0.2	0.2	3	1	3_Literature	0	0	0	0	0	0	0	0	0	0	0	0	0	0	0	0	0	0	0	0	0	0	0	0	0	0	0	0	0	0	0	0	0	0	0	0	0	0	0
none	none	none	MgO	74.985	0.6	0.2	0.2	3	0.2	3_Literature	0	0	0	0	0	0	0	0	0	0	0	0	0	0	0	0	0	0	0	0	0	0	0	0	0	0	0	0	0	0	0	0	0	0	0	0	0	0	0
none	none	none	MgO	74.985	0.6	0.2	0.2	3	0.4	3_Literature	0	0	0	0	0	0	0	0	0	0	0	0	0	0	0	0	0	0	0	0	0	0	0	0	0	0	0	0	0	0	0	0	0	0	0	0	0	0	0
none	none	none	MgO	74.985	0.6	0.2	0.2	3	0.2	3_Literature	0	0	0	0	0	0	0	0	0	0	0	0	0	0	0	0	0	0	0	0	0	0	0	0	0	0	0	0	0	0	0	0	0	0	0	0	0	0	0
none	none	none	MgO	74.985	0.6	0.2	0.2	3	0.3	3_Literature	0	0	0	0	0	0	0	0	0	0	0	0	0	0	0	0	0	0	0	0	0	0	0	0	0	0	0	0	0	0	0	0	0	0	0	0	0	0	0
none	none	none	MgO	74.985	0.6	0.2	0.2	3	0.4	3_Literature	0	0	0	0	0	0	0	0	0	0	0	0	0	0	0	0	0	0	0	0	0	0	0	0	0	0	0	0	0	0	0	0	0	0	0	0	0	0	0
none	none	none	MgO	74.985	0.6	0.2	0.2	3	0.6	3_Literature	0	0	0	0	0	0	0	0	0	0	0	0	0	0	0	0	0	0	0	0	0	0	0	0	0	0	0	0	0	0	0	0	0	0	0	0	0	0	0
none	none	none	MgO	74.985	0.6	0.2	0.2	3	0.6	3_Literature	0	0	0	0	0	0	0	0	0	0	0	0	0	0	0	0	0	0	0	0	0	0	0	0	0	0	0	0	0	0	0	0	0	0	0	0	0	0	0
none	none	none	MgO	74.985	0.6	0.2	0.2	3	1.3	3_Literature	0	0	0	0	0	0	0	0	0	0	0	0	0	0	0	0	0	0	0	0	0	0	0	0	0	0	0	0	0	0	0	0	0	0	0	0	0	0	0
none	none	none	MgO	74.985	0.6	0.2	0.2	3	2.2	3_Literature	0	0	0	0	0	0	0	0	0	0	0	0	0	0	0	0	0	0	0	0	0	0	0	0	0	0	0	0	0	0	0	0	0	0	0	0	0	0	0
none	none	none	MgO	74.985	0.6	0.2	0.2	3	2.9	3_Literature	0	0	0	0	0	0	0	0	0	0	0	0	0	0	0	0	0	0	0	0	0	0	0	0	0	0	0	0	0	0	0	0	0	0	0	0	0	0	0
none	none	none	MgO	74.985	0.6	0.2	0.2	3	0.1	3_Literature	0	0	0	0	0	0	0	0	0	0	0	0	0	0	0	0	0	0	0	0	0	0	0	0	0	0	0	0	0	0	0	0	0	0	0	0	0	0	0
none	none	none	MgO	74.985	0.6	0.2	0.2	3	0.2	3_Literature	0	0	0	0	0	0	0	0	0	0	0	0	0	0	0	0	0	0	0	0	0	0	0	0	0	0	0	0	0	0	0	0	0	0	0	0	0	0	0
none	none	none	MgO	74.985	0.6	0.2	0.2	3	0.3	3_Literature	0	0	0	0	0	0	0	0	0	0	0	0	0	0	0	0	0	0	0	0	0	0	0	0	0	0	0	0	0	0	0	0	0	0	0	0	0	0	0
none	none	none	MgO	74.985	0.6	0.2	0.2	3	0.5	3_Literature	0	0	0	0	0	0	0	0	0	0	0	0	0	0	0	0	0	0	0	0	0	0	0	0	0	0	0	0	0	0	0	0	0	0	0	0	0	0	0
none	none	none	MgO	74.985	0.6	0.2	0.2	3	0.3	3_Literature	0	0	0	0	0	0	0	0	0	0	0	0	0	0	0	0	0	0	0	0	0	0	0	0	0	0	0	0	0	0	0	0	0	0	0	0	0	0	0
none	none	none	MgO	74.985	0.6	0.2	0.2	3	0.7	3_Literature	0	0	0	0	0	0	0	0	0	0	0	0	0	0	0	0	0	0	0	0	0	0	0	0	0	0	0	0	0	0	0	0	0	0	0	0	0	0	0
none	none	none	MgO	74.985	0.6	0.2	0.2	3	1	3_Literature	0	0	0	0	0	0	0	0	0	0	0	0	0	0	0	0	0	0	0	0	0	0	0	0	0	0	0	0	0	0	0	0	0	0	0	0	0	0	0
none	none	none	MgO	74.985	0.6	0.2	0.2	3	1.4	3_Literature	0	0	0	0	0	0	0	0	0	0	0	0	0	0	0	0	0	0	0	0	0	0	0	0	0	0	0	0	0	0	0	0	0	0	0	0	0	0	0
none	none	none	MgO	74.985	0.6	0.2	0.2	3	0.7	3_Literature	0	0	0	0	0	0	0	0	0	0	0	0	0	0	0	0	0	0	0	0	0	0	0	0	0	0	0	0	0	0	0	0	0	0	0	0	0	0	0
none	none	none	MgO	74.985	0.6	0.2	0.2	3	0.4	3_Literature	0	0	0	0	0	0	0	0	0	0	0	0	0	0	0	0	0	0	0	0	0	0	0	0	0	0	0	0	0	0	0	0	0	0	0	0	0	0	0
none	none	none	MgO	74.985	0.6	0.2	0.2	3	0.8	3_Literature	0	0	0	0	0	0	0	0	0	0	0	0	0	0	0	0	0	0	0	0	0	0	0	0	0	0	0	0	0	0	0	0	0	0	0	0	0	0	0
none	none	none	MgO	74.985	0.6	0.2	0.2	3	1.2	3_Literature	0	0	0	0	0	0	0	0	0	0	0	0	0	0	0	0	0	0	0	0	0	0	0	0	0	0	0	0	0	0	0	0	0	0	0	0	0	0	0
none	none	none	MgO	74.985	0.6	0.2	0.2	3	1.6	3_Literature	0	0	0	0	0	0	0	0	0	0	0	0	0	0	0	0	0	0	0	0	0	0	0	0	0	0	0	0	0	0	0	0	0	0	0	0	0	0	0
Mn	Na	W	SiO2	79.985	0.76	0.19	0	4	1	3_Literature	0	0	0	0	0	0	0	0	0	0	0	0	0	0	0	0	0	0	0	0	0	0	0	0	0	0	0	0	0	0	0	0	0	0	0	0	0	0	0
Mn	Na	W	SiO2	79.985	0.76	0.19	0	4	1.3	3_Literature	0	0	0	0	0	0	0	0	0	0	0	0	0	0	0	0	0	0	0	0	0	0	0	0	0	0	0	0	0	0	0	0	0	0	0	0	0	0	0
Mn	Na	W	SiO2	79.985	0.76	0.19	0	4	2.9	3_Literature	0	0	0	0	0	0	0	0	0	0	0	0	0	0	0	0	0	0	0	0	0	0	0	0	0	0	0	0	0	0	0	0	0	0	0	0	0	0	0
Mn	Na	W	SiO2	79.985	0.76	0.19	0	4	6.4	3_Literature	0	0	0	0	0	0	0	0	0	0	0	0	0	0	0	0	0	0	0	0	0	0	0	0	0	0	0	0	0	0	0	0	0	0	0	0	0	0	0
La	Sr	none	CaO	79.985	0.76	0.19	0	4	2.3	3_Literature	0	0	0	0	0	0	0	0	0	0	0	0	0	1	0	0	0	0	0	0	0	0	0	0	0	0	0	0	0	0	0	0	0	0	0	1	0	0	0
La	Sr	none	CaO	79.985	0.76	0.19	0	4	4.8	3_Literature	0	0	0	0	0	0	0	0	0	0	0	0	0	1	0	0	0	0	0	0	0	0	0	0	0	0	0	0	0	0	0	0	0	0	0	1	0	0	0
La	Sr	none	CaO	79.985	0.76	0.19	0	4	4.2	3_Literature	0	0	0	0	0	0	0	0	0	0	0	0	0	1	0	0	0	0	0	0	0	0	0	0	0	0	0	0	0	0	0	0	0	0	0	1	0	0	0
La	Sr	none	CaO	79.985	0.76	0.19	0	4	6	3_Literature	0	0	0	0	0	0	0	0	0	0	0	0	0	1	0	0	0	0	0	0	0	0	0	0	0	0	0	0	0	0	0	0	0	0	0	1	0	0	0
La	Sr	none	CaO	79.985	0.76	0.19	0	4	9.5	3_Literature	0	0	0	0	0	0	0	0	0	0	0	0	0	1	0	0	0	0	0	0	0	0	0	0	0	0	0	0	0	0	0	0	0	0	0	1	0	0	0
La	Sr	none	CaO	79.985	0.76	0.19	0	4	11.3	3_Literature	0	0	0	0	0	0	0	0	0	0	0	0	0	1	0	0	0	0	0	0	0	0	0	0	0	0	0	0	0	0	0	0	0	0	0	1	0	0	0
La	none	none	MgO	94.985	0.59	0.09	0.3	7	12.6	3_Literature	0	0	0	0	0	0	0	0	0	0	0	0	0	0	0	0	0	0	0	0	0	0	0	0	0	0	0	0	0	0	0	0	0	0	0	1	0	0	0
La	none	none	MgO	95.985	0.59	0.09	0.3	7	15	3_Literature	0	0	0	0	0	0	0	0	0	0	0	0	0	0	0	0	0	0	0	0	0	0	0	0	0	0	0	0	0	0	0	0	0	0	0	1	0	0	0
La	none	none	MgO	97.485	0.59	0.09	0.3	7	14.4	3_Literature	0	0	0	0	0	0	0	0	0	0	0	0	0	0	0	0	0	0	0	0	0	0	0	0	0	0	0	0	0	0	0	0	0	0	0	1	0	0	0
La	none	none	MgO	101.985	0.59	0.09	0.3	7	13.5	3_Literature	0	0	0	0	0	0	0	0	0	0	0	0	0	0	0	0	0	0	0	0	0	0	0	0	0	0	0	0	0	0	0	0	0	0	0	1	0	0	0
La	none	none	MgO	101.985	0.59	0.09	0.3	7	13.6	3_Literature	0	0	0	0	0	0	0	0	0	0	0	0	0	0	0	0	0	0	0	0	0	0	0	0	0	0	0	0	0	0	0	0	0	0	0	1	0	0	0
La	none	none	MgO	102.485	0.59	0.09	0.3	7	13.4	3_Literature	0	0	0	0	0	0	0	0	0	0	0	0	0	0	0	0	0	0	0	0	0	0	0	0	0	0	0	0	0	0	0	0	0	0	0	1	0	0	0
La	none	none	MgO	90.985	0.59	0.09	0.3	7	11.5	3_Literature	0	0	0	0	0	0	0	0	0	0	0	0	0	0	0	0	0	0	0	0	0	0	0	0	0	0	0	0	0	0	0	0	0	0	0	1	0	0	0
La	none	none	MgO	73.485	0.59	0.09	0.3	7	11.5	3_Literature	0	0	0	0	0	0	0	0	0	0	0	0	0	0	0	0	0	0	0	0	0	0	0	0	0	0	0	0	0	0	0	0	0	0	0	1	0	0	0
La	none	none	MgO	82.485	0.59	0.09	0.3	7	11.2	3_Literature	0	0	0	0	0	0	0	0	0	0	0	0	0	0	0	0	0	0	0	0	0	0	0	0	0	0	0	0	0	0	0	0	0	0	0	1	0	0	0
La	none	none	MgO	91.985	0.45	0.11	0.4	4	7.6	3_Literature	0	0	0	0	0	0	0	0	0	0	0	0	0	0	0	0	0	0	0	0	0	0	0	0	0	0	0	0	0	0	0	0	0	0	0	1	0	0	0
La	none	none	MgO	99.985	0.45	0.11	0.4	4	7.8	3_Literature	0	0	0	0	0	0	0	0	0	0	0	0	0	0	0	0	0	0	0	0	0	0	0	0	0	0	0	0	0	0	0	0	0	0	0	1	0	0	0
La	none	none	MgO	88.985	0.45	0.11	0.4	4	7.1	3_Literature	0	0	0	0	0	0	0	0	0	0	0	0	0	0	0	0	0	0	0	0	0	0	0	0	0	0	0	0	0	0	0	0	0	0	0	1	0	0	0
none	none	none	La2O3	44.985	0.75	0.25	0	3	0	3_Literature	0	0	0	0	0	0	0	0	0	0	0	0	0	0	0	0	0	0	0	0	0	0	0	0	0	0	0	0	0	0	0	0	0	0	0	0	1	0	0
none	none	none	La2O3	49.985	0.75	0.25	0	3	4	3_Literature	0	0	0	0	0	0	0	0	0	0	0	0	0	0	0	0	0	0	0	0	0	0	0	0	0	0	0	0	0	0	0	0	0	0	0	0	1	0	0
none	none	none	La2O3	41.985	0.75	0.25	0	3	0	3_Literature	0	0	0	0	0	0	0	0	0	0	0	0	0	0	0	0	0	0	0	0	0	0	0	0	0	0	0	0	0	0	0	0	0	0	0	0	1	0	0
none	none	none	La2O3	44.985	0.75	0.25	0	3	10.9	3_Literature	0	0	0	0	0	0	0	0	0	0	0	0	0	0	0	0	0	0	0	0	0	0	0	0	0	0	0	0	0	0	0	0	0	0	0	0	1	0	0
none	none	none	La2O3	49.985	0.75	0.25	0	3	11.9	3_Literature	0	0	0	0	0	0	0	0	0	0	0	0	0	0	0	0	0	0	0	0	0	0	0	0	0	0	0	0	0	0	0	0	0	0	0	0	1	0	0
none	none	none	La2O3	44.985	0.75	0.25	0	3	0	3_Literature	0	0	0	0	0	0	0	0	0	0	0	0	0	0	0	0	0	0	0	0	0	0	0	0	0	0	0	0	0	0	0	0	0	0	0	0	1	0	0
none	none	none	La2O3	49.985	0.75	0.25	0	3	0	3_Literature	0	0	0	0	0	0	0	0	0	0	0	0	0	0	0	0	0	0	0	0	0	0	0	0	0	0	0	0	0	0	0	0	0	0	0	0	1	0	0
Li	W	Mn	SiO2	87.985	0.67	0.33	0	2	15	3_Literature	0	0	0	0	0	0	0	0	0	0	0	0	0	0	0	0	0	0	0	0	0	0	0	0	0	0	0	0	0	0	0	0	0	0	0	0	0	1	0
Li	W	Mn	SiO2	89.585	0.67	0.33	0	2	15	3_Literature	0	0	0	0	0	0	0	0	0	0	0	0	0	0	0	0	0	0	0	0	0	0	0	0	0	0	0	0	0	0	0	0	0	0	0	0	0	1	0
Li	W	Mn	SiO2	90.785	0.69	0.31	0	2.2	15	3_Literature	0	0	0	0	0	0	0	0	0	0	0	0	0	0	0	0	0	0	0	0	0	0	0	0	0	0	0	0	0	0	0	0	0	0	0	0	0	1	0
Li	W	Mn	SiO2	91.785	0.67	0.33	0	2	14	3_Literature	0	0	0	0	0	0	0	0	0	0	0	0	0	0	0	0	0	0	0	0	0	0	0	0	0	0	0	0	0	0	0	0	0	0	0	0	0	1	0
Li	W	Mn	SiO2	87.785	0.67	0.33	0	2	11	3_Literature	0	0	0	0	0	0	0	0	0	0	0	0	0	0	0	0	0	0	0	0	0	0	0	0	0	0	0	0	0	0	0	0	0	0	0	0	0	1	0
Li	W	Mn	SiO2	90.085	0.64	0.36	0	1.8	11	3_Literature	0	0	0	0	0	0	0	0	0	0	0	0	0	0	0	0	0	0	0	0	0	0	0	0	0	0	0	0	0	0	0	0	0	0	0	0	0	1	0
Li	W	Mn	SiO2	91.985	0.66	0.34	0	1.9	11	3_Literature	0	0	0	0	0	0	0	0	0	0	0	0	0	0	0	0	0	0	0	0	0	0	0	0	0	0	0	0	0	0	0	0	0	0	0	0	0	1	0
Li	W	Mn	SiO2	88.585	0.67	0.33	0	2	17	3_Literature	0	0	0	0	0	0	0	0	0	0	0	0	0	0	0	0	0	0	0	0	0	0	0	0	0	0	0	0	0	0	0	0	0	0	0	0	0	1	0
Li	W	Mn	SiO2	90.085	0.67	0.33	0	2	17	3_Literature	0	0	0	0	0	0	0	0	0	0	0	0	0	0	0	0	0	0	0	0	0	0	0	0	0	0	0	0	0	0	0	0	0	0	0	0	0	1	0
Li	W	Mn	SiO2	91.185	0.67	0.33	0	2	17	3_Literature	0	0	0	0	0	0	0	0	0	0	0	0	0	0	0	0	0	0	0	0	0	0	0	0	0	0	0	0	0	0	0	0	0	0	0	0	0	1	0
Li	W	Mn	SiO2	91.985	0.66	0.34	0	1.9	18	3_Literature	0	0	0	0	0	0	0	0	0	0	0	0	0	0	0	0	0	0	0	0	0	0	0	0	0	0	0	0	0	0	0	0	0	0	0	0	0	1	0
Li	W	Mn	SiO2	86.985	0.67	0.33	0	2	14	3_Literature	0	0	0	0	0	0	0	0	0	0	0	0	0	0	0	0	0	0	0	0	0	0	0	0	0	0	0	0	0	0	0	0	0	0	0	0	0	1	0
Li	W	Mn	SiO2	88.885	0.67	0.33	0	2	21	3_Literature	0	0	0	0	0	0	0	0	0	0	0	0	0	0	0	0	0	0	0	0	0	0	0	0	0	0	0	0	0	0	0	0	0	0	0	0	0	1	0
Li	W	Mn	SiO2	91.085	0.67	0.33	0	2	14	3_Literature	0	0	0	0	0	0	0	0	0	0	0	0	0	0	0	0	0	0	0	0	0	0	0	0	0	0	0	0	0	0	0	0	0	0	0	0	0	1	0
Li	W	Mn	SiO2	92.385	0.66	0.34	0	1.9	16	3_Literature	0	0	0	0	0	0	0	0	0	0	0	0	0	0	0	0	0	0	0	0	0	0	0	0	0	0	0	0	0	0	0	0	0	0	0	0	0	1	0
Li	W	Mn	SiO2	85.985	0.64	0.36	0	1.8	14	3_Literature	0	0	0	0	0	0	0	0	0	0	0	0	0	0	0	0	0	0	0	0	0	0	0	0	0	0	0	0	0	0	0	0	0	0	0	0	0	1	0
Li	W	Mn	SiO2	88.385	0.68	0.32	0	2.1	15	3_Literature	0	0	0	0	0	0	0	0	0	0	0	0	0	0	0	0	0	0	0	0	0	0	0	0	0	0	0	0	0	0	0	0	0	0	0	0	0	1	0
Li	W	Mn	SiO2	90.085	0.67	0.33	0	2	15	3_Literature	0	0	0	0	0	0	0	0	0	0	0	0	0	0	0	0	0	0	0	0	0	0	0	0	0	0	0	0	0	0	0	0	0	0	0	0	0	1	0
Li	W	Mn	SiO2	91.185	0.68	0.32	0	2.1	16	3_Literature	0	0	0	0	0	0	0	0	0	0	0	0	0	0	0	0	0	0	0	0	0	0	0	0	0	0	0	0	0	0	0	0	0	0	0	0	0	1	0
[truncated: 1,943 more rows]
[truncated: 52 more columns]
